# Supplementary material for: Evolutionary adaptation to juvenile malnutrition impacts adult metabolism and impairs adult fitness in Drosophila
Source: eLife. 2023 Oct 17;12:e92465. doi: 10.7554/eLife.92465 (PMC10637773; doi:10.7554/eLife.92465)
Supplement: Figure 4—source data 1. [file elife-92465-fig4-data1.xlsx]

## Sheet: Legend
Figure 4 - source data 1
Relationship between the plastic response and evolutionary change in gene expression and metabolite abundance induced by diet
(A) Source data for Figure 4A
(B) Source data for Figure 4B
Log2FC_Diet: plastic response to diet = log2 fold change in gene expression or metabolite abundance corresponding to the main effect of diet
Log2FC_Regime: evolutionary change in response to diet = log2 fold change in gene expression or metabolite abundance corresponding to the main effect of regime
Category: categories of genes as plotted in Figure 4A,B

## Sheet: (A) Plastic vs Evol Expression
FBgn	Symbol	Log2FC_Diet	Log2FC_Regime	Category
FBgn0001311	kkv	0.974802	0.910895	q < 0.1 cuticle
FBgn0004034	y	1.25826	1.706	q < 0.1 cuticle
FBgn0014454	Acp1	1.18636	1.53388	q < 0.1 cuticle
FBgn0020765	Acp65Aa	0.905926	1.21244	q < 0.1 cuticle
FBgn0028544	Vajk3	0.720869	1.20893	q < 0.1 cuticle
FBgn0033308	CG8736	1.78208	1.79597	q < 0.1 cuticle
FBgn0033597	Cpr47Ea	0.942807	1.26382	q < 0.1 cuticle
FBgn0033728	Cpr49Ae	0.648747	0.978565	q < 0.1 cuticle
FBgn0038405	CG8927	1.58104	1.47833	q < 0.1 cuticle
FBgn0039480	Cpr97Ea	0.943927	1.12442	q < 0.1 cuticle
FBgn0263132	Cht6	0.979497	1.08154	q < 0.1 cuticle
FBgn0033731	Cpr49Ah	1.4069	1.73966	q < 0.1 cuticle
FBgn0034391	CG15080	1.22266	1.51651	q < 0.1 cuticle
FBgn0034253	CG10936	0.603083	0.588642	q < 0.1 cuticle
FBgn0033668	exp	0.74702	0.70135	q < 0.1 cuticle
FBgn0024989	CG3777	0.675747	0.868213	q < 0.1 other
FBgn0024897	b6	1.0167	1.14811	q < 0.1 other
FBgn0030617	CG9095	0.842147	0.787941	q < 0.1 other
FBgn0261053	Cad86C	0.400016	0.507695	q < 0.1 other
FBgn0037721	CG9427	0.553268	0.719811	q < 0.1 other
FBgn0038799	MFS9	1.23118	1.08196	q < 0.1 other
FBgn0020762	Atet	0.370666	-0.62044	q < 0.1 other
FBgn0000024	Ace	0.739145	0.893867	q < 0.1 other
FBgn0046875	Obp83g	1.0698	1.20009	q < 0.1 other
FBgn0262717	Skeletor	0.562817	0.78501	q < 0.1 other
FBgn0038385	Fbxl7	0.493242	0.531364	q < 0.1 other
FBgn0261509	haf	0.823128	0.977861	q < 0.1 other
FBgn0028482	bdl	0.281203	0.555081	q < 0.1 other
FBgn0035272	mRpL46	-0.210169	0.289918	q < 0.1 other
FBgn0285925	Fas1	0.181177	0.41541	q < 0.1 other
FBgn0035968	Slc45-1	0.425448	0.70873	q < 0.1 other
FBgn0037897	CG5270	0.202161	-0.314952	q < 0.1 other
FBgn0000052	Pfas	0.219828	0.374921	q < 0.1 other
FBgn0259896	NimC1	0.313828	-0.702313	q < 0.1 other
FBgn0053093	CG33093	0.799822	-1.25061	q < 0.1 other
FBgn0027865	Tsp96F	-0.18778	-0.35611	q < 0.1 other
FBgn0036688	Fit2	-0.311702	0.541806	q < 0.1 other
FBgn0033252	CG12769	0.207511	0.332958	q < 0.1 other
FBgn0039290	CG13654	0.3707	-0.788049	q < 0.1 other
FBgn0031053	CG14223	0.399172	0.694156	q < 0.1 other
FBgn0010424	TpnC73F	0.313887	0.920673	q < 0.1 other
FBgn0002567	Rab32	-0.254437	0.509486	q < 0.1 other
FBgn0038819	Cpr92F	1.38938	1.36256	NS
FBgn0039481	Cpr97Eb	0.855657	0.627536	NS
FBgn0032538	Vajk2	0.726246	0.964437	NS
FBgn0035398	Cht7	0.639019	0.422492	NS
FBgn0039805	Cpr100A	0.968738	0.652506	NS
FBgn0036881	Cpr76Bd	0.628229	0.422208	NS
FBgn0025615	Torsin	-0.168851	0.159325	NS
FBgn0036985	zye	0.946406	0.689848	NS
FBgn0039719	CG15515	0.346746	0.425575	NS
FBgn0026077	Gasp	0.881207	0.507536	NS
FBgn0261341	verm	0.692681	0.445341	NS
FBgn0031879	uif	0.72531	0.478407	NS
FBgn0000319	Chc	0.132879	-0.191857	NS
FBgn0035574	RhoGEF64C	0.342504	0.556106	NS
FBgn0264959	Src42A	0.149509	0.166272	NS
FBgn0010415	Sdc	0.200213	-0.242238	NS
FBgn0085412	kmr	0.521278	0.691392	NS
FBgn0027280	l(1)G0193	0.1722	0.166362	NS
FBgn0037244	CG14647	-0.257177	0.274434	NS
FBgn0031942	CG7203	0.81112	0.782164	NS
FBgn0034974	CG16786	0.824245	0.702695	NS
FBgn0031011	CG8034	0.305147	-0.334431	NS
FBgn0040718	CG15353	-0.6142	-0.536808	NS
FBgn0027600	obst-B	0.53256	0.431566	NS
FBgn0030766	mthl1	0.224682	0.28741	NS
FBgn0038107	CG17327	-0.286061	0.242327	NS
FBgn0034246	Dcr-2	0.158652	-0.227382	NS
FBgn0287234	slf	0.406767	0.5305	NS
FBgn0035104	CG13875	0.521472	0.593834	NS
FBgn0051064	CG31064	0.208086	-0.295675	NS
FBgn0030594	fiz	-1.37415	-1.59144	NS
FBgn0061356	Hao	-0.81177	0.96285	NS
FBgn0032222	CG5037	-0.158988	0.180753	NS
FBgn0039239	CG13641	0.489925	-0.523507	NS
FBgn0032726	CG10621	-0.597834	0.703903	NS
FBgn0266801	CG45263	0.846458	0.557219	NS
FBgn0027791	O-fut2	-0.251846	0.251658	NS
FBgn0000719	fog	0.236264	0.20689	NS
FBgn0069973	CG40485	0.67877	0.804014	NS
FBgn0032681	CG10283	0.329601	0.419949	NS
FBgn0031668	CG31917	-0.254656	0.250864	NS
FBgn0284221	Sema5c	0.210595	0.321186	NS
FBgn0031307	MFS3	0.317536	0.43892	NS
FBgn0022770	Peritrophin-A	0.539388	0.472692	NS
FBgn0033121	Cyp6u1	-0.170573	0.177155	NS
FBgn0000542	ec	0.415401	0.34176	NS
FBgn0039712	CG15514	-0.115997	0.14105	NS
FBgn0040736	BomS3	0.430759	-0.634448	NS
FBgn0036773	CG13698	0.178665	0.234264	NS
FBgn0014877	Roe1	-0.149072	0.162758	NS
FBgn0010651	MFS14	0.342573	-0.526682	NS
FBgn0259727	CG42381	-0.133675	0.156401	NS
FBgn0267001	Ten-a	0.26571	0.319986	NS
FBgn0034649	PIG-M	-0.138532	0.153988	NS
FBgn0016754	sba	0.241575	0.360536	NS
FBgn0259994	OtopLa	0.428177	0.403012	NS
FBgn0032130	brwl	0.155458	0.175259	NS
FBgn0085240	CG34211	0.727831	0.711582	NS
FBgn0040496	CG17104	0.783997	0.981385	NS
FBgn0032805	CG10337	0.247869	-0.610009	NS
FBgn0286075	DNAlig3	0.107138	-0.157096	NS
FBgn0031649	hoe2	0.36871	-0.67194	NS
FBgn0035335	mRpL23	-0.15607	0.218907	NS
FBgn0030887	CG6867	0.250246	0.295676	NS
FBgn0029526	CR18166	0.398938	0.441816	NS
FBgn0035844	CG13676	0.585759	0.336592	NS
FBgn0029971	ND-MNLL	-0.220652	0.215093	NS
FBgn0031973	Spn28Dc	0.26828	-0.375054	NS
FBgn0033486	dmpd	-0.161395	0.232509	NS
FBgn0000636	Fas3	0.327113	0.213811	NS
FBgn0036332	Cul6	-0.244506	0.681448	NS
FBgn0036717	CG13731	0.890782	0.574389	NS
FBgn0032236	mRpS7	-0.176055	0.239292	NS
FBgn0030763	CG9782	0.643384	0.51167	NS
FBgn0037007	BNIP3	0.229237	-0.308793	NS
FBgn0038474	mRpS11	-0.170823	0.361306	NS
FBgn0050021	metro	0.320481	0.323147	NS
FBgn0001218	Hsc70-3	-0.213829	-0.305299	NS
FBgn0034083	lbk	0.266315	0.183121	NS
FBgn0033101	CG9436	-0.249989	0.250951	NS
FBgn0032536	Ance-3	0.433955	-0.519013	NS
FBgn0002716	mei-W68	0.747831	-0.682079	NS
FBgn0034063	CG8389	0.563078	-0.472258	NS
FBgn0035763	mrva	0.166274	-0.326193	NS
FBgn0028579	phtf	-0.118017	0.175198	NS
FBgn0038682	CG5835	0.327069	0.518968	NS
FBgn0025583	BomS2	0.627426	-0.677012	NS
FBgn0015575	alpha-Est7	-0.274206	-0.44547	NS
FBgn0050344	CG30344	0.232545	-0.805947	NS
FBgn0031970	CG7227	-0.378823	0.544854	NS
FBgn0033755	ClC-b	0.117168	-0.227354	NS
FBgn0031948	CG7149	-0.355416	-0.309281	NS
FBgn0030434	Brms1	-0.225804	0.214654	NS
FBgn0033100	CG3420	-0.243703	0.19268	NS
FBgn0034312	CG10916	0.239906	-0.326024	NS
FBgn0053138	AGBE	0.359752	0.552808	NS
FBgn0035266	Gk2	-0.443423	0.484432	NS
FBgn0034072	Dg	0.165568	0.235461	NS
FBgn0038299	Spn88Eb	0.326339	-0.396287	NS
FBgn0001186	Hex-A	0.244514	0.247995	NS
FBgn0032613	Nepl9	0.368111	-0.394607	NS
FBgn0003943	Ubi-p63E	0.235737	-0.342669	NS
FBgn0014009	Rab2	0.161585	-0.225219	NS
FBgn0051769	CG31769	0.238663	-0.31525	NS
FBgn0086446	DCTN6-p27	-0.106115	-0.132524	NS
FBgn0024754	Flo1	0.119705	-0.185196	NS
FBgn0045761	CHKov1	0.248154	-0.280366	NS
FBgn0035540	Syx17	0.198219	-0.253572	NS
FBgn0023001	melt	0.208706	0.280366	NS
FBgn0030056	CAH3	-0.236261	0.253393	NS
FBgn0260858	Ykt6	-0.0998796	0.109188	NS
FBgn0263278	Fic	-0.131107	-0.122222	NS
FBgn0039131	CG12268	0.458961	0.491742	NS
FBgn0031836	CG11050	0.212123	-0.32852	NS
FBgn0004811	fs(2)ltoPP43	-0.191765	-0.220615	NS
FBgn0030271	CG15202	-0.294742	-0.714056	NS
FBgn0033480	mRpL42	-0.184563	0.197808	NS
FBgn0037933	Ho	0.144216	-0.243782	NS
FBgn0034756	Cyp6d2	-0.37344	-0.626481	NS
FBgn0036510	SCCRO	-0.0767079	0.124792	NS
FBgn0033194	Vps13	0.344964	-0.319878	NS
FBgn0035427	ckd	0.70497	0.341502	NS
FBgn0024555	flfl	0.229331	-0.16112	NS
FBgn0034329	BomS1	0.445151	-0.72567	NS
FBgn0016038	Vsp37A	-0.135486	0.159749	NS
FBgn0033904	CG18327	-0.692802	0.659378	NS
FBgn0033744	Dh44-R2	0.33002	-0.606161	NS
FBgn0286222	Fum1	-0.134979	0.211679	NS
FBgn0051028	CG31028	0.47128	0.552442	NS
FBgn0264605	CG43954	0.258615	0.402206	NS
FBgn0263220	Hk	0.425805	0.365716	NS
FBgn0033919	CG8547	0.191473	-0.281075	NS
FBgn0031479	Prx6005	-0.23433	0.232017	NS
FBgn0028550	Atf3	0.200159	-0.298488	NS
FBgn0025391	Scgdelta	0.459395	1.23331	NS
FBgn0036044	Zasp67	0.655011	0.772837	NS
FBgn0029082	hbs	0.413018	0.595957	NS
FBgn0052091	CG32091	0.594028	-0.394079	NS
FBgn0040230	dbo	-0.162746	0.191287	NS
FBgn0050418	nord	0.502869	0.862666	NS
FBgn0052476	mthl14	-0.587326	-0.577373	NS
FBgn0032002	CG8353	-0.317556	-0.73355	NS
FBgn0033980	Cyp6a20	0.465559	-3.8697	NS
FBgn0263705	Myo10A	0.445173	0.234964	NS
FBgn0036030	Prps	0.208386	0.344218	NS
FBgn0017578	Max	0.159498	-0.186438	NS
FBgn0030305	Uba5	-0.261029	0.201209	NS
FBgn0028369	kirre	0.565625	0.402443	NS
FBgn0032935	Atg18b	0.216086	-0.278487	NS
FBgn0039741	CG7943	-0.27362	0.221847	NS
FBgn0266445	CG45075	0.442937	0.680363	NS
FBgn0002641	mal	-0.129495	-0.182918	NS
FBgn0031256	shv	-0.145056	-0.229534	NS
FBgn0030189	CG2909	0.200106	-0.489737	NS
FBgn0040391	CG2854	0.560054	-0.826749	NS
FBgn0042127	CG18789	-0.455477	0.44324	NS
FBgn0032017	CG7810	-0.125567	-0.156842	NS
FBgn0035436	CG12016	0.251279	-0.305643	NS
FBgn0003206	Ras64B	0.095104	-0.163949	NS
FBgn0029823	Shmt	-0.267842	0.638912	NS
FBgn0004363	porin	-0.107216	0.171916	NS
FBgn0032843	CG10730	0.435181	-0.553251	NS
FBgn0046685	Wsck	0.249827	-0.216092	NS
FBgn0043362	bchs	0.463738	-0.441435	NS
FBgn0085376	CG34347	0.400692	0.55069	NS
FBgn0037835	CG14687	0.197927	-0.279076	NS
FBgn0033987	ckn	0.159017	0.20746	NS
FBgn0038224	ATPsynE	-0.164791	0.22256	NS
FBgn0031357	mRpL48	-0.205541	0.204414	NS
FBgn0010473	tutl	0.425723	0.361155	NS
FBgn0033809	CG4630	-0.257052	-0.603984	NS
FBgn0052687	CG32687	0.261817	-0.393101	NS
FBgn0004395	unk	0.345833	0.262683	NS
FBgn0027655	htt	0.147835	-0.18905	NS
FBgn0268063	ltl	0.244728	-0.273507	NS
FBgn0263757	Rpb4	-0.302652	0.374065	NS
FBgn0035798	frac	0.711195	0.532368	NS
FBgn0030100	CG12106	-0.274263	0.288017	NS
FBgn0025680	cry	-0.302183	0.300847	NS
FBgn0036199	Bmcp	0.149273	0.223151	NS
FBgn0265416	Neto	0.317644	-0.472252	NS
FBgn0032076	Argl	-0.569703	0.485013	NS
FBgn0033934	CG17385	-0.132859	0.172852	NS
FBgn0085421	Epac	0.409353	0.418734	NS
FBgn0033529	CG17765	0.115495	-0.234709	NS
FBgn0034674	CG9304	-0.0902749	-0.161706	NS
FBgn0000047	Act88F	0.502049	1.00487	NS
FBgn0030183	Ypel	0.326664	-0.284464	NS
FBgn0037026	CG3634	-0.101417	0.154045	NS
FBgn0024277	trio	0.224176	0.206814	NS
FBgn0052499	Cda4	0.527132	0.331469	NS
FBgn0037610	CG8043	-0.122562	0.183163	NS
FBgn0267795	Frl	0.190714	-0.169787	NS
FBgn0026415	Idgf4	-0.296387	-0.354542	NS
FBgn0261873	sdt	0.304403	0.189935	NS
FBgn0261524	lic	-0.211979	0.157687	NS
FBgn0000451	ect	0.326129	0.37087	NS
FBgn0086687	Desat1	0.2061	-0.214483	NS
FBgn0002534	Lcp3	0.476493	1.59603	NS
FBgn0262111	f	1.13553	0.435938	NS
FBgn0243512	puc	0.340094	-0.203275	NS
FBgn0003371	sgg	0.134044	-0.209367	NS
FBgn0267339	p38c	-0.528573	-1.01103	NS
FBgn0030343	ATP7	0.186985	-0.16912	NS
FBgn0000422	Ddc	0.149111	-0.267557	NS
FBgn0026597	Axn	-0.164414	0.185929	NS
FBgn0024273	WASp	-0.0998688	0.130609	NS
FBgn0036680	Cpr73D	0.205199	-0.294239	NS
FBgn0036141	wls	-0.261824	0.299068	NS
FBgn0286203	stw	0.301651	0.0998428	NS
FBgn0003447	sn	-0.616005	0.777743	NS
FBgn0035280	Cpr62Bb	0.379743	0.241304	NS
FBgn0042627	FASN2	0.16506	0.148526	NS
FBgn0040388	boi	-0.449558	0.652562	NS
FBgn0000317	ck	-0.0526197	0.100997	NS
FBgn0014859	Hr38	0.527841	0.16868	NS
FBgn0015589	Apc	0.20268	-0.125457	NS
FBgn0250871	pot	0.463364	0.124461	NS
FBgn0000543	ecd	0.0750345	-0.228436	NS
FBgn0043900	pygo	-0.334006	0.143413	NS
FBgn0014006	Ask1	0.0418158	-0.125034	NS
FBgn0260006	drd	0.338784	0.358244	NS
FBgn0039594	snu	0.119491	-0.134253	NS
FBgn0002121	l(2)gl	0.0767886	-0.0940109	NS
FBgn0027508	Tnks	0.0369527	-0.175718	NS
FBgn0064237	Idgf5	0.124902	-0.662433	NS
FBgn0038180	Cht5	0.217841	-0.172667	NS
FBgn0026238	gus	-0.236037	0.105233	NS
FBgn0024509	Sec13	-0.174717	0.0470651	NS
FBgn0012051	CalpA	0.122471	-0.0774069	NS
FBgn0013763	Idgf6	-0.0756793	-0.176411	NS
FBgn0020764	Alas	0.102312	-0.0934443	NS
FBgn0283531	Duox	-0.58943	0.248045	NS
FBgn0052029	Cpr66D	-0.219907	-0.916704	NS
FBgn0265434	zip	0.104413	0.0839945	NS
FBgn0015765	p38a	-0.0321306	-0.109573	NS
FBgn0020414	Idgf3	0.175778	-0.307007	NS
FBgn0038947	Sar1	0.0833713	0.0587342	NS
FBgn0039907	lgs	0.0241721	-0.0309799	NS
FBgn0031737	obst-E	0.0657001	-0.235922	NS
FBgn0020416	Idgf1	-0.0630847	-0.545635	NS
FBgn0022702	Cht2	0.0827932	0.393589	NS
FBgn0024326	Mkk4	0.0272364	0.0622534	NS
FBgn0001112	Gld	0.412092	0.118226	NS
FBgn0015623	Cpr	0.0983913	-0.0503714	NS
FBgn0050042	Cpr49Ab	0.0389162	0.155915	NS
FBgn0031872	ihog	-0.163648	0.0685846	NS
FBgn0261260	mgl	0.185176	-0.0411406	NS
FBgn0086357	Sec61alpha	-0.11332	0.028433	NS
FBgn0029091	Chs2	-0.149024	-0.366793	NS
FBgn0086367	t	-0.0651815	-0.0652748	NS
FBgn0035281	Cpr62Bc	0.514013	0.108581	NS
FBgn0011509	SrpRbeta	-0.0116425	-0.0410989	NS
FBgn0003028	ovo	-0.0892671	0.629946	NS
FBgn0034582	Cht9	-1.60838	0.461725	NS
FBgn0020618	Rack1	-0.0943527	-0.0210986	NS
FBgn0016797	fz2	0.152389	-0.0204339	NS
FBgn0031646	snsl	-0.0596632	0.368282	NS
FBgn0050163	Cpr60D	-0.0317649	0.346149	NS
FBgn0004396	CrebA	0.289503	-0.0198426	NS
FBgn0035985	Cpr67B	0.300229	0.0169728	NS
FBgn0011225	jar	-0.0131549	-0.182554	NS
FBgn0042119	Cpr65Au	-0.269144	0.0363994	NS
FBgn0024846	p38b	0.00618223	-0.0225529	NS
FBgn0032234	gny	-0.0540072	0.00691205	NS
FBgn0011591	fng	0.288169	-0.0067746	NS
FBgn0010019	Cyp4g1	0.0791261	-0.0119051	NS
FBgn0000527	e	-0.0169685	-0.0957111	NS
FBgn0034517	Cpr57A	0.181081	-0.0118794	NS
FBgn0261020	wol	0.0320449	0.00312083	NS
FBgn0026598	Apc2	-0.351412	0.017577	NS
FBgn0000546	EcR	-0.066579	0.00190935	NS
FBgn0264672	Eogt	-0.0466802	-0.000600708	NS
FBgn0035612	frm	0.438111	-0.408826	NS
FBgn0035490	CG1136	0.462397	-0.0463575	NS
FBgn0024320	Npc1a	0.19475	-0.128298	NS
FBgn0003301	rut	0.158671	-0.214853	NS
FBgn0015582	dare	-0.0432055	-0.0596832	NS
FBgn0263782	Hmgcr	0.0621784	0.147485	NS
FBgn0287831	speck	0.128843	-0.119375	NS
FBgn0263667	Lpt	-0.048221	0.0733675	NS
FBgn0250850	rig	-0.315298	0.164869	NS
FBgn0261238	Alh	-0.160045	-0.671674	NS
FBgn0000370	crc	0.0288499	-0.108623	NS
FBgn0037207	Mes2	0.0204246	0.029877	NS
FBgn0259243	Pka-R1	0.0154425	0.0585519	NS
FBgn0028738	ETH	-0.102211	-0.0642777	NS
FBgn0003255	rk	0.0518968	0.0422403	NS
FBgn0000568	Eip75B	0.248963	-0.0123673	NS
FBgn0010051	Itpr	-0.0397686	0.00635213	NS
FBgn0004636	Rap1	0.144211	-0.316956	NS
FBgn0003090	pk	0.203058	0.298341	NS
FBgn0264272	mwh	0.262143	0.301507	NS
FBgn0035533	Cip4	0.0950496	0.264783	NS
FBgn0028979	tio	0.178441	-0.22033	NS
FBgn0001083	fw	0.457718	0.367003	NS
FBgn0263289	scrib	0.11674	0.152606	NS
FBgn0035719	tow	0.450237	0.268523	NS
FBgn0086698	frtz	0.169564	-0.0747172	NS
FBgn0016977	spen	0.224591	-0.0752628	NS
FBgn0005536	Mbs	0.0920944	-0.077025	NS
FBgn0283712	LIMK1	0.149051	0.0791473	NS
FBgn0016081	fry	0.170812	-0.0976974	NS
FBgn0031461	daw	0.121029	0.123027	NS
FBgn0261064	Rbsn-5	-0.151419	0.0840426	NS
FBgn0026181	Rok	0.211384	0.0678274	NS
FBgn0260934	par-1	0.151361	-0.0832687	NS
FBgn0015615	SMC3	-0.202052	0.0961135	NS
FBgn0003187	qua	-0.525332	1.22573	NS
FBgn0259734	Nost	-0.0472085	0.0721668	NS
FBgn0003866	tsh	0.211034	-0.0557515	NS
FBgn0039532	Mtl	-0.139072	0.0508896	NS
FBgn0259212	cno	0.126313	0.0337806	NS
FBgn0260049	flr	-0.104975	0.0197933	NS
FBgn0260941	app	0.0907099	0.0168963	NS
FBgn0001122	Galphao	0.081536	-0.0168894	NS
FBgn0003744	trc	-0.0150785	-0.0104682	NS
FBgn0036365	cmb	0.0149844	-0.110294	NS
FBgn0086898	dgo	-0.0188989	0.399509	NS
FBgn0032150	CG13123	-0.013324	0.198828	NS
FBgn0037671	ATP6AP2	-0.00777804	-0.0331158	NS
FBgn0015838	Vang	0.00748921	0.308144	NS
FBgn0011726	tsr	-0.136876	0.00505485	NS
FBgn0001259	in	0.285663	-0.00221379	NS
FBgn0001321	knk	0.650267	0.405043	NS
FBgn0000117	arm	-0.0988915	0.158059	NS
FBgn0261277	rtv	0.249432	-0.463156	NS
FBgn0003162	Pu	0.147175	0.27626	NS
FBgn0260653	serp	0.589803	0.264827	NS
FBgn0262125	Sec23	-0.0735669	-0.0754953	NS
FBgn0259749	mmy	0.134124	0.098173	NS
FBgn0003870	ttk	0.173838	0.0767638	NS
FBgn0261797	Dhc64C	0.0561125	-0.091838	NS
FBgn0001085	fz	-0.37173	0.738202	NS
FBgn0032812	Hakai	-0.208991	0.087495	NS
FBgn0004859	ci	0.170632	-0.0528783	NS
FBgn0028968	gammaCOP	-0.0540657	0.0235698	NS
FBgn0053196	dpy	0.377367	0.079816	NS
FBgn0262126	Sec24CD	-0.0136127	-0.0774936	NS
FBgn0020521	pio	0.176706	-0.0318145	NS
FBgn0005626	ple	-0.328128	-0.0906622	NS
FBgn0085432	pan	0.290007	-0.0203455	NS
FBgn0031097	obst-A	0.225639	0.037742	NS
FBgn0002525	Lam	0.0239385	0.300174	NS
FBgn0259211	grh	0.407196	-0.00486721	NS
FBgn0011642	Zyx	0.0928553	-0.0766986	NS
FBgn0035049	Mmp1	0.148481	-0.0680944	NS
FBgn0002552	lin	-0.205106	0.183357	NS
FBgn0284247	ds	0.63015	0.199057	NS
FBgn0000658	fj	0.422165	-0.311905	NS
FBgn0003514	sqh	0.0774135	-0.187329	NS
FBgn0010333	Rac1	-0.049813	0.154573	NS
FBgn0001987	Gli	0.198415	0.104588	NS
FBgn0010434	cora	0.178171	-0.1107	NS
FBgn0014020	Rho1	0.0521797	-0.163208	NS
FBgn0001075	ft	0.536317	0.113151	NS
FBgn0016076	vri	0.2021	-0.126787	NS
FBgn0000499	dsh	-0.17633	0.0449107	NS
FBgn0010341	Cdc42	-0.0142908	-0.107619	NS
FBgn0040285	Scamp	0.136457	-0.263747	NS
FBgn0263762	CG43679	0.554588	0.953162	NS
FBgn0085397	Fili	0.558952	-0.50754	NS
FBgn0039557	CG12259	-0.209197	0.20113	NS
FBgn0033945	CG12868	0.26597	-0.501813	NS
FBgn0250838	roh	-0.155189	0.20604	NS
FBgn0051475	CG31475	0.423118	0.409308	NS
FBgn0283473	S6KL	0.136329	-0.135359	NS
FBgn0039709	Cad99C	0.228419	0.322774	NS
FBgn0026566	CG1307	-0.167031	0.219058	NS
FBgn0259991	CG42488	-0.201261	0.180247	NS
FBgn0033266	Socs44A	0.199088	-0.360657	NS
FBgn0033249	CG11191	0.433175	0.511532	NS
FBgn0035142	Hipk	0.186418	0.166626	NS
FBgn0039068	Pex11c	-0.209791	0.229562	NS
FBgn0033086	CG9410	-0.13766	0.18339	NS
FBgn0085319	CG34290	1.04114	0.599839	NS
FBgn0261555	CG42673	0.364177	0.293344	NS
FBgn0262574	CG43114	-0.682676	1.24229	NS
FBgn0038515	CG5823	-0.122269	0.156844	NS
FBgn0038857	Bdbt	-0.234792	0.176806	NS
FBgn0032053	mRpL51	-0.185	0.280047	NS
FBgn0010397	LamC	0.141915	-0.285035	NS
FBgn0033373	CG8080	-0.162013	0.268129	NS
FBgn0035998	CG3437	-0.175509	-0.442911	NS
FBgn0017430	Nelf-E	-0.188488	0.274127	NS
FBgn0034331	BomBc2	0.30244	-0.747544	NS
FBgn0036196	CG11658	0.461849	-0.356985	NS
FBgn0261584	CG42694	0.258188	-0.341828	NS
FBgn0003710	tipE	0.331664	0.36564	NS
FBgn0027070	Ugt36E1	-0.142767	-0.230051	NS
FBgn0034909	CG4797	-0.236743	-0.584809	NS
FBgn0266490	CG45089	-0.207703	0.138184	NS
FBgn0031894	CG4496	-0.544681	-0.411592	NS
FBgn0032138	CG4364	0.117384	-0.1565	NS
FBgn0030733	UQCR-14	-0.180025	0.22939	NS
FBgn0051224	CG31224	-0.137176	0.179825	NS
FBgn0066292	CheB42c	0.411915	-0.396911	NS
FBgn0053002	mRpL27	-0.131704	0.402268	NS
FBgn0004133	blow	0.280459	0.471532	NS
FBgn0015380	drl	0.266599	0.460018	NS
FBgn0043783	CG32444	-0.738348	0.504279	NS
FBgn0035977	PGRP-LF	0.435857	-0.2674	NS
FBgn0036622	Agpat4	-0.211707	0.291305	NS
FBgn0032343	CG6201	-0.257657	0.250307	NS
FBgn0050035	Tret1-1	0.251124	-0.405484	NS
FBgn0031459	HINT1	-0.119639	0.201501	NS
FBgn0038533	CG7523	0.20823	-0.273238	NS
FBgn0039562	Gp93	-0.145048	-0.263645	NS
FBgn0051675	CG31675	0.178918	-0.276036	NS
FBgn0025628	CG4199	0.270223	-0.56965	NS
FBgn0033734	CG8520	-0.128369	0.178508	NS
FBgn0051973	Cda5	0.780694	0.329431	NS
FBgn0032004	CG8292	-0.241954	-0.491802	NS
FBgn0032219	CG4995	-0.424794	0.578616	NS
FBgn0085446	CG34417	0.226892	-0.293699	NS
FBgn0004507	GlyP	0.325865	0.327578	NS
FBgn0261113	Xrp1	0.28868	-0.339527	NS
FBgn0283649	elgi	-0.236559	0.461936	NS
FBgn0038649	PGS1	-0.206118	0.238733	NS
FBgn0052672	Atg8a	0.156438	-0.209239	NS
FBgn0003885	alphaTub84D	-0.152954	0.204642	NS
FBgn0260933	rempA	0.295661	0.332322	NS
FBgn0043841	vir-1	0.197774	-0.384949	NS
FBgn0004598	Fur2	-0.205767	0.28667	NS
FBgn0043010	Fsn	-0.17537	0.136935	NS
FBgn0259730	tal-1A	0.212603	0.338539	NS
FBgn0039305	CG11858	-0.186356	0.23422	NS
FBgn0024289	Sodh-1	-0.428771	0.46469	NS
FBgn0013949	Elal	-0.258234	-0.341176	NS
FBgn0039527	CG5639	0.382291	0.253863	NS
FBgn0003209	raw	0.185744	-0.303945	NS
FBgn0029976	snz	0.146571	0.252017	NS
FBgn0033993	CG8089	-0.441598	0.527531	NS
FBgn0038319	mRpL9	-0.234379	0.188003	NS
FBgn0259244	CG42342	0.220946	0.387163	NS
FBgn0015222	Fer1HCH	0.164792	-0.38167	NS
FBgn0085282	CG34253	0.221633	-0.382417	NS
FBgn0004435	Galphaq	0.174422	-0.122132	NS
FBgn0259233	CG42331	0.331968	-0.67943	NS
FBgn0039067	wda	-0.116022	-0.251026	NS
FBgn0025336	CG4882	-0.139649	0.196144	NS
FBgn0051414	Gba1b	0.230067	0.356316	NS
FBgn0000057	adp	-0.136441	-0.133272	NS
FBgn0051823	CG31823	0.584346	-0.308197	NS
FBgn0030329	prtp	0.132901	-0.261587	NS
FBgn0030336	CG1578	0.132413	-0.17993	NS
FBgn0001989	ND-B17	-0.127989	0.187274	NS
FBgn0040099	lectin-28C	-0.516683	-0.457622	NS
FBgn0026261	bonsai	-0.116425	0.159016	NS
FBgn0003388	shd	0.245723	-0.668021	NS
FBgn0029766	CG15784	0.46772	-1.12817	NS
FBgn0019982	Gs1l	-0.127839	0.168727	NS
FBgn0024947	NTPase	0.149055	-0.288643	NS
FBgn0032422	atilla	0.231248	-0.363198	NS
FBgn0040392	CG14050	0.450979	-0.679341	NS
FBgn0031245	CG3625	-0.317526	0.669692	NS
FBgn0036815	HipHop	-0.454608	0.509524	NS
FBgn0028429	I-2	0.215496	-0.58229	NS
FBgn0033608	CG13220	-0.172617	0.150553	NS
FBgn0259938	cwo	0.1922	-0.231601	NS
FBgn0015622	Cnx99A	-0.136837	-0.116218	NS
FBgn0000239	bur	0.102311	-0.145371	NS
FBgn0069969	CG40498	0.333789	0.365873	NS
FBgn0015269	Nf1	0.136434	-0.380571	NS
FBgn0038576	Arp5	-0.15375	0.204706	NS
FBgn0039209	REPTOR	0.38008	-0.1909	NS
FBgn0085419	Rgk2	0.391881	0.824137	NS
FBgn0037024	tzn	-0.264598	0.193467	NS
FBgn0037199	EMC4	-0.0961829	0.143488	NS
FBgn0032116	Mco1	-0.216374	-0.587528	NS
FBgn0036887	CG9231	-0.0926536	0.13298	NS
FBgn0036502	CG7841	-0.112039	0.371163	NS
FBgn0085813	18SrRNA-Psi:CR41602	0.887742	0.427371	NS
FBgn0038465	Irc	0.203643	-0.403835	NS
FBgn0037386	CG1208	0.428897	0.862337	NS
FBgn0035359	CG1143	0.277406	-0.362682	NS
FBgn0036770	Prestin	-0.140732	-0.580876	NS
FBgn0028648	mRpL50	-0.123613	0.26861	NS
FBgn0036211	CG5946	-0.157261	-0.478478	NS
FBgn0036685	CG6664	-0.0931326	0.116722	NS
FBgn0040650	CG15456	-0.339555	0.446312	NS
FBgn0050339	CG30339	-0.572053	1.303	NS
FBgn0034269	Hyccin	-0.187094	0.169556	NS
FBgn0033915	CG8485	0.233788	-0.417791	NS
FBgn0032514	CG9302	-0.253246	0.344071	NS
FBgn0259878	Fs	0.391837	0.595121	NS
FBgn0010226	GstS1	-0.224974	0.433914	NS
FBgn0038925	Cchl	-0.12043	0.219747	NS
FBgn0031908	CG5177	-0.203058	-0.231274	NS
FBgn0050499	Rpe	-0.113178	0.132965	NS
FBgn0034797	nahoda	0.486637	0.244792	NS
FBgn0027552	CG10863	-0.344712	0.442377	NS
FBgn0040899	CG17776	-0.247213	0.14768	NS
FBgn0033302	Cyp6a14	0.331814	-0.701137	NS
FBgn0035769	CTCF	-0.200551	-0.248772	NS
FBgn0035236	CG12004	0.102509	0.149517	NS
FBgn0040993	CG17325	0.285708	0.327244	NS
FBgn0033391	CG8026	-0.177805	0.2108	NS
FBgn0039728	CG7896	0.639751	0.346236	NS
FBgn0283472	S6k	0.165758	-0.201037	NS
FBgn0262141	CG42867	0.312188	-0.591636	NS
FBgn0260743	GC1	-0.284897	0.407348	NS
FBgn0038316	CG6276	-0.269475	0.13018	NS
FBgn0085220	Ufm1	-0.126569	0.191606	NS
FBgn0031239	CG17075	0.605928	0.442413	NS
FBgn0038400	CG5903	-0.133561	0.14864	NS
FBgn0039886	CG2003	-0.19529	-0.293285	NS
FBgn0000083	AnxB9	0.159055	-0.266074	NS
FBgn0031258	CG4297	0.250433	0.215365	NS
FBgn0015229	glec	0.201234	0.304279	NS
FBgn0259239	CG42337	0.442791	1.00239	NS
FBgn0031766	CG9117	-0.163558	-0.373243	NS
FBgn0054056	CG34056	0.180245	-0.251079	NS
FBgn0263863	mRpL45	-0.112894	0.158013	NS
FBgn0031048	CG12237	-0.10586	0.206285	NS
FBgn0028965	CG9933	-0.114978	0.147104	NS
FBgn0020386	Pdk1	0.238666	0.192769	NS
FBgn0085384	CG34355	0.250662	-0.396226	NS
FBgn0035907	GstO1	-0.242972	0.289914	NS
FBgn0037653	Iru	-0.117344	0.129074	NS
FBgn0004449	Ten-m	0.201578	-0.281628	NS
FBgn0035086	CG12851	0.309105	0.828303	NS
FBgn0286818	Pdi	-0.124068	-0.246818	NS
FBgn0034945	CG10904	-0.122806	0.135591	NS
FBgn0027360	Tim10	-0.0978895	0.133688	NS
FBgn0261801	CG42747	0.396785	0.447809	NS
FBgn0030850	stas	0.100652	-0.133569	NS
FBgn0259228	C3G	0.12703	0.201331	NS
FBgn0004397	Vinc	0.137255	-0.222134	NS
FBgn0040653	Dso1	0.542754	-0.718451	NS
FBgn0003435	sm	0.227569	0.160214	NS
FBgn0050154	CG30154	0.291528	-0.420584	NS
FBgn0020294	ko	0.221119	0.247442	NS
FBgn0032612	CG13282	0.305085	-0.248647	NS
FBgn0010602	lwr	-0.251955	0.229809	NS
FBgn0036928	Tom20	-0.15949	0.152339	NS
FBgn0029508	Tsp42Ea	0.118978	0.139236	NS
FBgn0030870	CG6398	0.102315	0.135194	NS
FBgn0259482	Mob3	-0.136625	0.176566	NS
FBgn0051710	CG31710	0.311705	-0.211811	NS
FBgn0038326	CG5044	0.15155	0.237484	NS
FBgn0030065	CG12075	0.309906	0.274893	NS
FBgn0011672	Mvl	0.0876809	-0.167244	NS
FBgn0267519	28SrRNA-Psi:CR45859	0.840031	0.435966	NS
FBgn0031602	CG15431	0.214056	0.25472	NS
FBgn0267522	28SrRNA-Psi:CR45862	1.02354	0.38467	NS
FBgn0037890	CG17734	-0.146759	-0.408304	NS
FBgn0026239	gukh	0.182436	-0.374993	NS
FBgn0260859	Bet3	-0.0803398	0.153379	NS
FBgn0260431	CG42526	0.179291	0.351415	NS
FBgn0267511	28SrRNA-Psi:CR45851	0.831663	0.491862	NS
FBgn0035211	CG2211	-0.122512	-0.251465	NS
FBgn0011455	ND-SGDH	-0.132465	0.202423	NS
FBgn0034067	CG8399	0.236101	0.141937	NS
FBgn0287767	Cndp2	-0.157628	-0.165778	NS
FBgn0033633	Smyd4-3	0.184028	0.331917	NS
FBgn0051216	Naam	0.364814	0.273784	NS
FBgn0045852	ham	0.186423	-0.215845	NS
FBgn0036152	CG6175	0.158252	0.16849	NS
FBgn0034646	Rae1	-0.206141	0.299387	NS
FBgn0263873	sick	0.226423	0.170989	NS
FBgn0034215	Mtap	-0.243323	0.206495	NS
FBgn0051126	CG31126	-0.243352	0.180344	NS
FBgn0001296	kar	0.174807	0.352582	NS
FBgn0029959	Rab39	0.175656	-0.362833	NS
FBgn0085753	28SrRNA-Psi:CR40596	0.942059	0.441301	NS
FBgn0000244	by	0.145442	-0.253604	NS
FBgn0031399	mio	0.0916534	-0.147337	NS
FBgn0032780	CG13085	-0.237439	-0.290569	NS
FBgn0083968	CG34132	-0.161065	0.292025	NS
FBgn0053494	CG33494	0.203009	-0.456368	NS
FBgn0039321	CG10550	-0.167427	-0.427956	NS
FBgn0065032	Arpc3B	-0.383572	-0.64603	NS
FBgn0034110	Atg9	0.117595	-0.268219	NS
FBgn0038830	CG17272	-0.131052	0.381897	NS
FBgn0032084	CG13101	-0.134988	0.231483	NS
FBgn0034365	CG5335	-0.10962	-0.316989	NS
FBgn0036180	Duba	0.0715676	-0.139692	NS
FBgn0026741	mRpL18	-0.243066	0.238875	NS
FBgn0265180	CG44245	0.235124	0.217536	NS
FBgn0039555	mRpS22	-0.109155	0.168612	NS
FBgn0037239	Sfxn1-3	0.175688	-0.229305	NS
FBgn0015609	CadN	0.361932	0.644167	NS
FBgn0033400	CG2063	-0.141295	0.109866	NS
FBgn0026316	Ubc10	-0.126875	0.0817869	NS
FBgn0030286	Gapvd1	0.0917602	0.126625	NS
FBgn0037730	CG9444	0.643673	-0.491952	NS
FBgn0033961	ND-B15	-0.123257	0.160233	NS
FBgn0036291	CG10681	0.125425	-0.361227	NS
FBgn0035181	CG9205	-0.136675	0.130675	NS
FBgn0016119	ATPsynCF6	-0.174092	0.189519	NS
FBgn0264001	bru3	-0.390208	-0.51977	NS
FBgn0013469	klu	0.286369	0.165337	NS
FBgn0035831	Pop4	-0.244607	-0.213734	NS
FBgn0035046	ND-19	-0.219114	0.184716	NS
FBgn0026059	Mhcl	0.215108	0.232795	NS
FBgn0037363	Atg17	0.246837	0.191284	NS
FBgn0250851	CG33981	0.0808855	-0.104949	NS
FBgn0001230	Hsp68	-0.465351	-0.342056	NS
FBgn0002431	hyd	0.0673509	-0.0937434	NS
FBgn0034258	eIF3c	0.101403	-0.168479	NS
FBgn0050197	CG30197	-0.175085	-0.334995	NS
FBgn0034727	mRpS29	-0.180058	0.205904	NS
FBgn0020300	geko	0.314083	-0.2917	NS
FBgn0035470	Ccz1	0.113576	-0.112635	NS
FBgn0261931	CG42797	-0.279069	0.316694	NS
FBgn0034576	ND-B14.7	-0.154965	0.171178	NS
FBgn0259229	CG42329	-0.36281	1.41817	NS
FBgn0038467	AdSL	-0.117399	0.308817	NS
FBgn0032849	mRpS18B	-0.159176	0.324972	NS
FBgn0260223	CG42497	-0.111143	0.127533	NS
FBgn0029825	CG12728	-0.201961	-0.313225	NS
FBgn0014391	sun	-0.179621	0.150225	NS
FBgn0012036	Aldh	-0.194291	0.251775	NS
FBgn0005585	Calr	-0.0893801	-0.137845	NS
FBgn0038704	CG5316	0.0841812	0.234551	NS
FBgn0040206	krz	0.128703	0.16713	NS
FBgn0060296	pain	0.225817	0.178393	NS
FBgn0025864	Crag	0.121125	-0.131744	NS
FBgn0004652	fru	0.368614	0.166638	NS
FBgn0035207	Herc4	-0.0940977	-0.118508	NS
FBgn0262656	Myc	0.397103	-0.205025	NS
FBgn0032205	CG4957	-0.121655	-0.190224	NS
FBgn0023130	a6	-0.126395	0.228369	NS
FBgn0000152	Axs	0.10023	0.21474	NS
FBgn0051673	CG31673	-0.195976	0.221369	NS
FBgn0050463	Pgant9	0.199468	0.185425	NS
FBgn0000629	E(z)	-0.134442	0.169768	NS
FBgn0003285	rst	0.241339	0.52699	NS
FBgn0005612	Sox14	0.206033	-0.333886	NS
FBgn0032401	Plzf	0.199764	0.219217	NS
FBgn0038422	CG14880	0.214119	0.276668	NS
FBgn0039537	Hsdl2	-0.113707	0.183481	NS
FBgn0033686	Hen1	-0.281576	0.216646	NS
FBgn0004509	Fur1	0.102509	-0.14195	NS
FBgn0083972	CG34136	0.419399	-0.303944	NS
FBgn0051777	CG31777	-0.208257	-0.297891	NS
FBgn0062440	EMRE	-0.124975	0.14499	NS
FBgn0020249	stck	0.103741	-0.155831	NS
FBgn0015803	RtGEF	0.0968232	-0.127911	NS
FBgn0031251	CG4213	0.232752	-0.408475	NS
FBgn0034136	DAT	0.350862	0.306919	NS
FBgn0033353	CG13749	0.566209	0.604488	NS
FBgn0020407	asun	-0.266041	-0.209197	NS
FBgn0032485	CG9426	-0.148806	0.160589	NS
FBgn0030007	alpha-PheRS	-0.193098	0.183263	NS
FBgn0031117	GstT3	0.165407	0.186218	NS
FBgn0028683	spt4	-0.267653	0.261162	NS
FBgn0263050	CG43345	-0.560587	0.65603	NS
FBgn0038304	CG12241	-0.111868	-0.100153	NS
FBgn0028526	CG15293	0.212161	-0.415151	NS
FBgn0030966	shop	-0.132379	0.209183	NS
FBgn0028473	Non1	0.131952	-0.34087	NS
FBgn0264908	pHCl-1	0.349863	0.387208	NS
FBgn0036264	CG11529	-0.383676	-0.609003	NS
FBgn0041188	Atx2	0.11053	0.107327	NS
FBgn0029866	CG3842	-0.152715	-0.186299	NS
FBgn0000426	SmF	-0.320556	0.434058	NS
FBgn0037713	CG16790	-0.204459	0.411769	NS
FBgn0036918	Pfdn6	-0.0912841	0.140515	NS
FBgn0051908	CG31908	-0.100338	-0.102528	NS
FBgn0031282	Pex12	-0.0972131	0.137198	NS
FBgn0261625	GLS	0.311117	0.592759	NS
FBgn0031022	CG12204	-0.190738	0.26312	NS
FBgn0262599	SmydA-3	0.306849	0.544839	NS
FBgn0086676	spin	-0.164313	-0.290374	NS
FBgn0032836	CG10680	0.181779	-0.362662	NS
FBgn0029939	CG9650	0.859884	1.43878	NS
FBgn0037203	slif	-0.725283	0.42713	NS
FBgn0036501	CG7272	0.168598	-0.215428	NS
FBgn0038504	Sur-8	0.0972804	0.197146	NS
FBgn0036769	Tsp74F	0.196924	0.186191	NS
FBgn0054001	CG34001	-0.529404	0.374791	NS
FBgn0031776	Pfdn1	-0.180271	0.143567	NS
FBgn0000256	capu	-0.22729	-0.242109	NS
FBgn0016122	Acer	-0.188189	-0.300484	NS
FBgn0050481	mRpL53	-0.125287	0.12371	NS
FBgn0030969	Usp39	-0.229812	0.247343	NS
FBgn0266758	Esyt2	0.174098	-0.330012	NS
FBgn0002772	Mlc1	0.209946	0.186989	NS
FBgn0038424	CG17565	-0.0990395	-0.100319	NS
FBgn0266599	Hsc70-4	-0.15636	-0.161831	NS
FBgn0030572	mRpS25	-0.206716	0.125463	NS
FBgn0033853	CG6145	0.223981	-0.197859	NS
FBgn0036774	mRpS26	-0.0929457	0.226802	NS
FBgn0033402	Myd88	0.223314	-0.408572	NS
FBgn0031640	Mon1	-0.0775513	-0.0815579	NS
FBgn0050345	CG30345	0.177333	-0.565077	NS
FBgn0051146	Nlg1	0.18851	-0.190389	NS
FBgn0027343	fz3	0.152484	0.355733	NS
FBgn0036239	Pop2	-0.14125	0.118472	NS
FBgn0267521	18SrRNA-Psi:CR45861	0.690045	0.659032	NS
FBgn0050160	CG30160	-1.71614	-2.40712	NS
FBgn0011770	Gip	-0.237852	-0.131292	NS
FBgn0028741	fab1	0.0605473	-0.0996995	NS
FBgn0032036	CG13384	0.171353	-0.160858	NS
FBgn0016691	ATPsynO	-0.136433	0.226251	NS
FBgn0032901	sky	0.185873	0.158436	NS
FBgn0022153	l(2)k05819	0.117054	-0.121687	NS
FBgn0267378	sau	0.101164	-0.267824	NS
FBgn0036117	CG6321	-0.223526	0.11919	NS
FBgn0038654	CG14298	0.474099	0.309321	NS
FBgn0031643	CG3008	0.103643	-0.196128	NS
FBgn0036544	sff	0.322313	0.709387	NS
FBgn0040337	CG3021	-0.117195	0.292332	NS
FBgn0051373	CG31373	-0.804357	0.297112	NS
FBgn0037731	CG18542	-1.10104	1.28107	NS
FBgn0019624	COX5A	-0.140785	0.204282	NS
FBgn0031490	CG17264	0.519418	0.974178	NS
FBgn0035675	CG6610	-0.259478	0.256153	NS
FBgn0033226	puml	0.203973	-0.296491	NS
FBgn0034877	levy	-0.163219	0.185438	NS
FBgn0036663	CG9674	0.167691	-0.218842	NS
FBgn0050423	CG30423	0.0927527	-0.178118	NS
FBgn0000115	Arl1	-0.0721778	-0.0841847	NS
FBgn0036761	MED19	-0.297604	0.276551	NS
FBgn0003714	tko	-0.202889	0.164022	NS
FBgn0044511	mRpS21	-0.115765	0.25377	NS
FBgn0004169	up	0.32796	0.187865	NS
FBgn0031298	Atg4a	0.151455	-0.303609	NS
FBgn0038722	Nup58	-0.447031	0.396467	NS
FBgn0031633	Fnta	-0.067655	-0.149241	NS
FBgn0027505	Rab3-GAP	0.119405	-0.101859	NS
FBgn0032052	PIG-U	-0.145726	0.1856	NS
FBgn0004910	Eip63F-1	0.290849	0.247855	NS
FBgn0037885	CG17721	-0.139657	0.13824	NS
FBgn0035813	CG8492	0.322088	0.255061	NS
FBgn0032684	Ugt301D1	0.320866	-0.217285	NS
FBgn0264562	Hr4	-0.383456	-0.483034	NS
FBgn0264816	koko	-0.406828	0.508859	NS
FBgn0085354	CG34325	0.304875	-0.174769	NS
FBgn0037656	CG11986	-0.192189	0.386918	NS
FBgn0261999	Ca-Ma2d	0.325239	0.191984	NS
FBgn0011581	Ms	0.262415	0.396464	NS
FBgn0031590	CG3702	-0.108739	0.245688	NS
FBgn0031021	ND-18	-0.111343	0.234922	NS
FBgn0033033	scaf	0.230916	-0.352932	NS
FBgn0261989	CG42807	-0.651919	-0.7389	NS
FBgn0035251	Vta1	0.102856	-0.185402	NS
FBgn0038484	CG5246	-0.54243	-2.47303	NS
FBgn0036821	CG3961	0.177268	-0.207813	NS
FBgn0002306	sas	0.469158	0.230962	NS
FBgn0035498	Fit1	0.112192	-0.211199	NS
FBgn0265356	tn	0.256454	-0.214844	NS
FBgn0027572	ACOX1	0.177995	-0.42266	NS
FBgn0028743	Dhit	0.239157	0.2766	NS
FBgn0035542	DOR	0.139735	-0.206244	NS
FBgn0030331	CG15221	-1.7964	1.79537	NS
FBgn0030704	CG15916	-0.135729	0.0894732	NS
FBgn0284243	betaTub56D	-0.246529	0.218213	NS
FBgn0030521	CtsB	0.154729	-0.149933	NS
FBgn0037761	CG8534	0.179227	0.301381	NS
FBgn0021967	ND-PDSW	-0.144444	0.143359	NS
FBgn0014023	mRpL47	-0.136167	0.124281	NS
FBgn0029506	Tsp42Ee	0.0916556	-0.233679	NS
FBgn0040534	Sf3b5	-0.225534	0.16497	NS
FBgn0017550	Rga	-0.143488	0.112986	NS
FBgn0031990	PAPLA1	0.189253	-0.194792	NS
FBgn0030790	CG4768	-0.153786	0.192494	NS
FBgn0004957	por	-0.317799	0.286623	NS
FBgn0034878	pita	-0.140275	0.155596	NS
FBgn0265988	mv	0.129096	-0.149192	NS
FBgn0016123	Alp4	-0.482077	0.57281	NS
FBgn0052536	CG32536	-0.173454	-0.392779	NS
FBgn0038381	EndoU	-0.205023	0.26096	NS
FBgn0261270	Sps1	-0.588278	0.464556	NS
FBgn0031529	CG9662	-0.117673	0.138909	NS
FBgn0029801	CG15771	-0.147078	0.289943	NS
FBgn0040308	Jafrac2	-0.1986	0.187773	NS
FBgn0036726	QIL1	-0.152471	0.126061	NS
FBgn0026374	Rhp	0.240692	-0.270682	NS
FBgn0036318	Wbp2	0.142971	-0.247816	NS
FBgn0035981	CG4452	-0.155227	-0.143924	NS
FBgn0035965	Use1	-0.150798	0.351003	NS
FBgn0003189	r	0.358836	0.487589	NS
FBgn0032494	CG5945	-0.217637	-0.24267	NS
FBgn0050476	ave	-0.103749	-0.212911	NS
FBgn0003390	shf	0.181834	-0.301237	NS
FBgn0032117	FucTB	0.145304	-0.183003	NS
FBgn0031498	CG17260	-0.148702	-0.163126	NS
FBgn0030505	NFAT	0.169359	0.195263	NS
FBgn0039663	CG2321	-0.489121	0.835949	NS
FBgn0023517	Pgam5	-0.165273	0.26242	NS
FBgn0261790	SmE	-0.28072	0.293448	NS
FBgn0000116	Argk	-0.116077	-0.226539	NS
FBgn0032260	CG13144	0.307441	0.543073	NS
FBgn0261975	CG42806	0.143833	0.194012	NS
FBgn0027052	STUB1	-0.0842976	0.152631	NS
FBgn0037550	CG9667	-0.15068	-0.120113	NS
FBgn0261353	Ccdc56	-0.111073	0.0935462	NS
FBgn0033538	CG11883	0.169272	0.296004	NS
FBgn0033247	Nup44A	-0.101268	0.311213	NS
FBgn0030017	CG2278	-0.265168	-0.330703	NS
FBgn0033387	CG8008	0.259432	-0.256319	NS
FBgn0038839	Ktl	0.572096	0.445802	NS
FBgn0037081	barc	-0.117252	0.161335	NS
FBgn0036805	Chmp1	0.124164	-0.141544	NS
FBgn0011296	l(2)efl	-0.259119	-0.271041	NS
FBgn0015321	Ubc4	-0.138154	0.133268	NS
FBgn0035189	CG9119	-0.405101	-0.254159	NS
FBgn0036368	CG10738	0.188055	0.630081	NS
FBgn0036684	CG3764	0.18232	-0.251812	NS
FBgn0038451	CG14893	0.50731	0.425208	NS
FBgn0001308	Khc	0.0869966	-0.108346	NS
FBgn0033421	CG1888	-0.140881	0.215725	NS
FBgn0031066	COX6B	-0.199722	0.16408	NS
FBgn0015781	P5cr	-0.170948	0.119351	NS
FBgn0052196	CG32196	0.135831	-0.164788	NS
FBgn0035848	Uxs	-0.0866325	0.0948925	NS
FBgn0034741	CG4269	0.74724	-0.678904	NS
FBgn0036824	CG3902	-0.151256	-0.330761	NS
FBgn0039159	mRpS24	-0.159521	0.124219	NS
FBgn0250814	UQCR-C2	-0.120941	0.157361	NS
FBgn0086785	Vps36	0.0603782	-0.156999	NS
FBgn0033812	Pex13	-0.151643	0.0941621	NS
FBgn0001090	bnb	0.252295	-0.178824	NS
FBgn0030518	CG11134	-0.12207	-0.141679	NS
FBgn0014010	Rab5	0.0996081	-0.166023	NS
FBgn0030809	Ubr1	0.145072	-0.104114	NS
FBgn0027563	CG9631	0.147729	-0.376161	NS
FBgn0036285	toe	0.261147	0.460537	NS
FBgn0001215	Hrb98DE	-0.200512	0.16376	NS
FBgn0035282	CNMa	-0.251942	-0.61636	NS
FBgn0038675	CG6013	-0.0957131	0.091945	NS
FBgn0029840	raptor	-0.08351	0.0764179	NS
FBgn0052115	CG32115	-0.293351	-0.407289	NS
FBgn0053057	CG33057	0.263479	0.193892	NS
FBgn0052174	Coq4	-0.0818431	-0.102872	NS
FBgn0263352	Unr	0.183398	0.211832	NS
FBgn0011584	Trp1	0.108222	-0.198711	NS
FBgn0029819	Usp30	-0.0922902	-0.0733648	NS
FBgn0039266	CG11791	0.167204	-0.156348	NS
FBgn0031049	Sec61gamma	-0.221034	0.133895	NS
FBgn0033381	GstE13	-0.126343	0.30354	NS
FBgn0030787	CG9609	-0.324327	0.494499	NS
FBgn0033209	CG12107	-0.156475	0.105192	NS
FBgn0000055	Adh	-0.325544	0.643838	NS
FBgn0034389	Mctp	-0.116864	-0.174511	NS
FBgn0266669	Sec3	-0.0531763	0.071488	NS
FBgn0039698	CG7789	-0.117533	0.092445	NS
FBgn0040236	c11.1	0.155976	-0.169649	NS
FBgn0040323	GNBP1	0.15982	-0.339145	NS
FBgn0032399	CG6785	0.359514	0.370838	NS
FBgn0041160	comm2	0.379774	-0.382517	NS
FBgn0034182	SmydA-7	0.225939	0.20772	NS
FBgn0039943	CG17168	-0.124843	0.126199	NS
FBgn0259677	CG42346	0.307673	-0.255932	NS
FBgn0024291	Sirt1	-0.129665	0.0862124	NS
FBgn0263260	sel	-0.184782	-0.152312	NS
FBgn0034057	CG8314	-0.0694272	-0.0993155	NS
FBgn0031413	CG9967	-0.343112	0.523024	NS
FBgn0027549	Nulp1	-0.0608047	0.100389	NS
FBgn0013764	Chi	-0.109532	0.0947803	NS
FBgn0035482	CG14985	-0.143501	0.153227	NS
FBgn0050008	CG30008	0.247496	0.217265	NS
FBgn0035032	ATPsynF	-0.125024	0.20755	NS
FBgn0030511	CG11158	0.128458	-0.249415	NS
FBgn0002715	mei-S332	-0.718944	0.964854	NS
FBgn0038460	CG18622	-0.39904	-0.395337	NS
FBgn0039882	Rift	-0.0930235	0.133224	NS
FBgn0015298	Srp19	-0.0843516	0.1201	NS
FBgn0027090	GlnRS	-0.108488	0.238665	NS
FBgn0031632	CG15628	0.255374	0.371163	NS
FBgn0046704	Liprin-alpha	0.0839676	0.120431	NS
FBgn0027495	Smyd4-4	-0.177894	0.248687	NS
FBgn0263397	Ih	0.162531	-0.273116	NS
FBgn0036249	CG11560	-0.131789	-0.123701	NS
FBgn0040777	CG14767	0.128685	-0.135617	NS
FBgn0027342	fz4	-0.289311	0.314884	NS
FBgn0051678	CG31678	0.0756823	0.15838	NS
FBgn0262481	CG43071	-0.827055	0.609178	NS
FBgn0030514	CG9941	-0.0802102	0.0919861	NS
FBgn0034645	ND-B12	-0.165714	0.295318	NS
FBgn0028425	JhI-21	-0.249844	0.433609	NS
FBgn0035073	CG16896	-0.260002	0.34986	NS
FBgn0051365	CG31365	-0.213653	0.200084	NS
FBgn0011274	Dif	0.180958	-0.21105	NS
FBgn0050185	AIMP3	-0.135583	0.198989	NS
FBgn0028397	Tob	0.129416	0.217916	NS
FBgn0035827	Srp9	-0.080638	0.16647	NS
FBgn0035039	Adck1	0.177237	0.347839	NS
FBgn0035916	GAPsec	0.0646395	-0.196668	NS
FBgn0033271	CG8708	0.785767	-0.391547	NS
FBgn0010583	dock	-0.136598	0.151465	NS
FBgn0041702	CG15107	-0.304221	0.345903	NS
FBgn0036812	Nufip	-0.211531	0.241631	NS
FBgn0024329	Mekk1	0.148787	0.143864	NS
FBgn0051935	CG31935	0.0632844	-0.122491	NS
FBgn0038586	CG7168	-0.197346	0.125852	NS
FBgn0040070	Trx-2	-0.123204	-0.0922352	NS
FBgn0267515	28SrRNA-Psi:CR45855	0.908115	0.342894	NS
FBgn0030584	CG14407	-0.0874099	0.121075	NS
FBgn0264002	MsR2	0.158776	-0.390489	NS
FBgn0035517	CG1265	-0.101058	0.301435	NS
FBgn0014073	Tie	0.537367	0.176721	NS
FBgn0033317	CG8635	-0.150174	0.154897	NS
FBgn0067779	dbr	0.11415	0.142674	NS
FBgn0037819	Phyhd1	-0.401843	0.260976	NS
FBgn0036485	FucTA	0.517892	0.27003	NS
FBgn0031871	Fgop2	-0.118639	0.133986	NS
FBgn0014269	prod	-0.189403	0.127046	NS
FBgn0039226	Ude	0.229431	-0.203675	NS
FBgn0045064	bwa	0.226519	-0.327927	NS
FBgn0010222	Nmdmc	0.301674	0.35456	NS
FBgn0262743	Fs(2)Ket	-0.20954	0.271766	NS
FBgn0031050	Arp10	-0.0646421	-0.115237	NS
FBgn0035976	PGRP-LC	0.244231	0.22275	NS
FBgn0034290	CG5773	-0.494952	0.360982	NS
FBgn0035421	nSMase	-0.229009	0.176037	NS
FBgn0028387	chm	-0.311753	0.275221	NS
FBgn0014092	CG4278	-0.113577	0.159197	NS
FBgn0039244	CG11069	0.240793	0.220136	NS
FBgn0016970	l(2)k10201	-0.211781	0.233333	NS
FBgn0032924	Nbr	-0.169578	0.202521	NS
FBgn0263354	CG42784	0.588152	0.54778	NS
FBgn0038461	EMC2B	-0.121939	-0.217224	NS
FBgn0037659	Kdm2	0.0989624	0.123337	NS
FBgn0035688	fmt	-0.179144	-0.309415	NS
FBgn0031815	frj	0.146733	-0.169102	NS
FBgn0010612	ATPsynG	-0.105518	0.179673	NS
FBgn0039355	CG4730	-0.553763	0.833911	NS
FBgn0031126	Cyp6v1	-0.21986	0.243649	NS
FBgn0037109	MED1	-0.120967	0.174666	NS
FBgn0051109	CG31109	-0.285931	0.196101	NS
FBgn0032511	ND-B22	-0.141741	0.133967	NS
FBgn0261067	LSm1	-0.141061	0.110624	NS
FBgn0014000	Hf	-0.174308	-0.270939	NS
FBgn0024811	Crk	-0.143436	0.114214	NS
FBgn0001624	dlg1	0.153758	0.130212	NS
FBgn0025620	CG13360	0.17527	-0.417658	NS
FBgn0036314	Sf3a2	-0.240789	0.126263	NS
FBgn0030853	ND-24	-0.101811	0.208854	NS
FBgn0038678	mRpL55	-0.16955	0.143773	NS
FBgn0030479	Rbp1-like	0.228572	-0.222432	NS
FBgn0036020	CG8336	-0.0825536	0.0864321	NS
FBgn0039024	Nepl15	0.178524	-0.282476	NS
FBgn0022343	CG3760	-0.110612	0.144687	NS
FBgn0003607	Su(var)205	-0.170962	0.208101	NS
FBgn0024833	AP-1mu	-0.146257	0.0888612	NS
FBgn0037130	Syn1	0.303041	0.229418	NS
FBgn0261041	stj	0.445668	0.929689	NS
FBgn0037638	CG8379	-0.0707666	-0.0727241	NS
FBgn0033196	CG1358	-0.294326	0.681243	NS
FBgn0031313	CG5080	-0.167381	-0.366089	NS
FBgn0263046	CG43341	0.29046	0.224681	NS
FBgn0034000	CG11808	-0.177399	0.218815	NS
FBgn0017567	ND-23	-0.127544	0.178604	NS
FBgn0046776	CR14033	-0.810263	1.11343	NS
FBgn0030817	CG4991	-0.421691	0.580225	NS
FBgn0038453	Arl6IP1	-0.17982	0.160184	NS
FBgn0010423	TpnC47D	-0.207669	-0.468912	NS
FBgn0036842	Ugt316A1	-0.061362	0.115065	NS
FBgn0050359	Mal-A5	-0.102376	0.228113	NS
FBgn0038865	cDIP	-0.291782	-0.510784	NS
FBgn0033691	CG8860	-0.217537	0.150656	NS
FBgn0025802	Sbf	0.06842	-0.134622	NS
FBgn0039634	alpha-Man-Ib	-0.243483	0.172091	NS
FBgn0037102	CRIF	-0.243481	0.149111	NS
FBgn0031997	PGAP5	-0.182923	0.117011	NS
FBgn0024983	CG4293	-0.112417	0.158164	NS
FBgn0261547	Exn	0.226771	0.314895	NS
FBgn0000287	salr	0.603758	0.29513	NS
FBgn0030894	Mvb12	0.247171	-0.240315	NS
FBgn0032949	Lamp1	0.0916422	-0.188885	NS
FBgn0087011	CG41520	0.397266	0.179454	NS
FBgn0030686	mRpL3	-0.144476	0.120927	NS
FBgn0034135	Syn2	0.488287	0.310117	NS
FBgn0037340	CG14671	-0.125176	-0.124423	NS
FBgn0051155	Rpb7	-0.140681	0.160638	NS
FBgn0052259	CG32259	0.392678	-0.568421	NS
FBgn0051068	CG31068	0.562472	-0.305676	NS
FBgn0038388	CG4287	-0.0787933	-0.107453	NS
FBgn0260944	Rbp1	-0.0779455	0.0935853	NS
FBgn0035708	axed	0.285681	-0.212586	NS
FBgn0263258	chas	0.214929	0.16686	NS
FBgn0058006	CG40006	-0.109587	-0.147144	NS
FBgn0033134	Tsp42El	0.211507	-0.171079	NS
FBgn0033527	CG11777	-0.187869	0.349221	NS
FBgn0086346	ALiX	0.104069	-0.180786	NS
FBgn0023537	CG17896	-0.0755646	0.281035	NS
FBgn0002283	l(3)73Ah	-0.172474	0.255734	NS
FBgn0038271	UQCR-C1	-0.102322	0.147396	NS
FBgn0030768	Nemp	-0.0987177	-0.122253	NS
FBgn0034315	CG5721	-0.0588613	-0.128186	NS
FBgn0067622	LSm-4	-0.188057	0.388246	NS
FBgn0037796	CG12814	0.252206	-0.159535	NS
FBgn0031453	Bacc	0.26396	-0.108592	NS
FBgn0039873	Smvt	-1.70238	1.63341	NS
FBgn0037288	CG14661	-0.155009	-0.26798	NS
FBgn0016120	ATPsynD	-0.179428	0.156063	NS
FBgn0039589	CG9986	-0.237043	0.220831	NS
FBgn0002707	mei-9	-0.252633	0.427017	NS
FBgn0029888	ND-ASHI	-0.106828	0.145959	NS
FBgn0032248	Bug22	-0.143267	0.198316	NS
FBgn0261588	pdm3	0.350465	0.239451	NS
FBgn0030932	Ggt-1	-0.372664	0.409285	NS
FBgn0033015	d4	-0.165525	0.237319	NS
FBgn0033453	Sting	-0.131953	-0.228473	NS
FBgn0037369	CG2100	-0.170743	0.278753	NS
FBgn0039830	ATPsynC	-0.116028	0.15641	NS
FBgn0037329	POLDIP2	-0.0855537	0.151777	NS
FBgn0033010	Atf6	0.165869	-0.157423	NS
FBgn0264078	Flo2	0.0829979	-0.184197	NS
FBgn0033413	prel	-0.106177	0.259974	NS
FBgn0037076	ebd2	-0.392853	0.693096	NS
FBgn0025678	CaBP1	-0.109735	-0.141894	NS
FBgn0033989	CG7639	-0.0821026	0.104109	NS
FBgn0035444	CG12012	0.114657	-0.343684	NS
FBgn0032614	CG13284	0.168431	-0.18446	NS
FBgn0037822	CG14683	-0.217195	0.193205	NS
FBgn0024689	fws	-0.049983	0.107218	NS
FBgn0033616	CG7745	-0.20041	0.201823	NS
FBgn0028689	Rpn6	0.107314	-0.290889	NS
FBgn0083167	Neb-cGP	-0.156915	0.152295	NS
FBgn0039291	CG13663	-0.08081	-0.477798	NS
FBgn0033192	Corin	0.26117	-0.287331	NS
FBgn0030334	Karl	0.134982	-0.515534	NS
FBgn0050105	CG30105	-0.43909	0.477823	NS
FBgn0036778	Cyp312a1	0.585763	-0.397212	NS
FBgn0000579	Eno	-0.0972727	0.196371	NS
FBgn0029868	ND-B16.6	-0.122002	0.133412	NS
FBgn0259933	Dpm2	0.131619	0.0879417	NS
FBgn0053116	CG33116	-0.285885	0.351429	NS
FBgn0261673	nemy	-0.640815	0.658962	NS
FBgn0036483	CG12316	-0.34039	0.401668	NS
FBgn0050394	CG30394	0.126101	0.098657	NS
FBgn0029689	CG6428	0.149381	-0.134463	NS
FBgn0010339	128up	-0.148674	0.216229	NS
FBgn0034540	Lrt	0.295126	-0.255424	NS
FBgn0035318	CG9018	-0.161035	0.112467	NS
FBgn0039636	Atg14	-0.0900828	-0.173976	NS
FBgn0284253	LeuRS	0.123369	0.212279	NS
FBgn0015569	alpha-Est10	-0.221001	-0.329262	NS
FBgn0265974	ttv	-0.163612	0.187311	NS
FBgn0031493	Sf3b2	-0.131736	0.146076	NS
FBgn0036053	iPLA2-VIA	0.192664	-0.175387	NS
FBgn0036837	CG18135	0.250028	-0.262823	NS
FBgn0001217	Hsc70-2	0.241067	0.281365	NS
FBgn0030087	CG7766	0.285749	-0.175108	NS
FBgn0004167	kst	0.185725	-0.218181	NS
FBgn0086253	rumi	-0.221401	0.233199	NS
FBgn0004876	cdi	-0.228712	0.246735	NS
FBgn0033652	ths	0.655763	0.392499	NS
FBgn0002931	net	0.369951	0.208775	NS
FBgn0033378	tsu	-0.0958579	0.135477	NS
FBgn0067905	Dso2	0.461255	-0.559312	NS
FBgn0038145	Droj2	-0.0841872	-0.100091	NS
FBgn0266598	Kmn2	-0.675449	0.517696	NS
FBgn0033570	ND-B14	-0.141688	0.151173	NS
FBgn0000667	Actn	0.205914	0.115112	NS
FBgn0032907	CG9272	-0.568484	0.469963	NS
FBgn0034519	BORCS7	0.137773	-0.157058	NS
FBgn0011016	SsRbeta	-0.167925	0.102082	NS
FBgn0003480	spn-B	-0.381159	0.626231	NS
FBgn0034191	CG6984	0.0764303	-0.0988606	NS
FBgn0040733	BomS6	0.213627	-0.656317	NS
FBgn0013334	Sap47	0.122522	0.132377	NS
FBgn0015371	chn	-0.477797	0.467689	NS
FBgn0085188	CG34159	-0.0648089	0.0916725	NS
FBgn0015766	Msr-110	0.136529	-0.274936	NS
FBgn0032517	CG7099	0.0688932	-0.101914	NS
FBgn0030740	CG9917	-0.139134	-0.113866	NS
FBgn0029822	CG12236	-0.225218	0.310221	NS
FBgn0039678	Obp99a	-1.38566	1.80076	NS
FBgn0262699	fzr	0.0914483	0.173149	NS
FBgn0031869	CG18304	0.180642	0.215761	NS
FBgn0027615	OXA1L	-0.271647	0.177169	NS
FBgn0031639	mRpS2	-0.111776	0.116381	NS
FBgn0035233	Pex10	-0.220207	-0.139931	NS
FBgn0040384	CG32795	-0.109778	0.131594	NS
FBgn0034361	mRpS28	-0.10071	0.156686	NS
FBgn0250789	alpha-Spec	0.145918	-0.148916	NS
FBgn0030778	CG4678	0.19532	-0.291045	NS
FBgn0039153	GatB	-0.149752	0.160277	NS
FBgn0034002	CG8079	0.202469	0.253698	NS
FBgn0261258	rgn	0.193327	0.169539	NS
FBgn0035082	CG2811	-0.147396	0.235964	NS
FBgn0030692	mRpS30	-0.176651	0.137479	NS
FBgn0040531	CG11741	-0.294407	0.346703	NS
FBgn0040532	CG8369	0.336186	-0.258823	NS
FBgn0037298	Sccpdh1	-0.0968038	-0.234143	NS
FBgn0002441	l(3)mbt	-0.290048	0.135885	NS
FBgn0037807	CG6293	-0.471964	0.74742	NS
FBgn0083983	mRpL34	-0.141857	0.203243	NS
FBgn0037312	CG11999	-0.106694	-0.265527	NS
FBgn0028360	Cdc7	0.205498	0.211732	NS
FBgn0278608	Dsp1	0.222716	0.149635	NS
FBgn0033663	ERp60	-0.150687	-0.130701	NS
FBgn0052698	CARPB	-0.196168	-0.23424	NS
FBgn0034139	CG4927	0.23868	-0.919562	NS
FBgn0015031	cype	-0.180684	0.149642	NS
FBgn0029756	CG3309	-0.185655	0.24801	NS
FBgn0030421	Agpat1	0.287178	-0.28801	NS
FBgn0036848	Naxd	0.0858096	-0.234254	NS
FBgn0031971	Sirup	0.544315	0.249313	NS
FBgn0040985	CG6115	0.168094	0.160172	NS
FBgn0085438	CG34409	0.204491	0.364391	NS
FBgn0029994	Ldsdh1	-0.195561	-0.445757	NS
FBgn0036126	Irbp18	0.1005	-0.291151	NS
FBgn0037094	CG7611	0.135778	-0.128081	NS
FBgn0034624	CG17974	0.848279	0.488343	NS
FBgn0032242	CG5355	-0.088199	0.115571	NS
FBgn0266421	RPA3	-0.320331	0.333139	NS
FBgn0037644	CG11964	-0.108325	0.264445	NS
FBgn0001128	Gpdh1	-0.207287	0.494883	NS
FBgn0034725	CG6044	0.479316	0.286205	NS
FBgn0039328	CHKov2	0.250888	-0.173403	NS
FBgn0051676	CG31676	0.156428	0.279726	NS
FBgn0050290	Ppcdc	-0.0540272	0.110971	NS
FBgn0034521	Mgat1	-0.061503	0.113616	NS
FBgn0027525	LTV1	0.083822	-0.219633	NS
FBgn0029524	CG3176	0.282832	0.194434	NS
FBgn0041194	Prat2	-0.335477	0.352484	NS
FBgn0039022	Nepl13	0.198224	-0.250934	NS
FBgn0038721	subdued	0.177255	-0.56328	NS
FBgn0036509	CG7739	0.0901345	-0.200288	NS
FBgn0032476	CG5439	-0.085631	0.128086	NS
FBgn0038820	CG4000	0.518143	0.224177	NS
FBgn0028658	Adat1	0.290567	0.265118	NS
FBgn0040964	CG18661	-0.170694	0.55834	NS
FBgn0058439	CG40439	0.0711982	-0.100772	NS
FBgn0031473	CG3104	0.137595	0.275728	NS
FBgn0052023	CG32023	-1.91126	1.86295	NS
FBgn0043002	Chrac-14	-0.580373	0.527435	NS
FBgn0039831	CG12054	0.130784	0.121244	NS
FBgn0037443	Dmtn	0.1827	-0.213794	NS
FBgn0037635	CG9837	0.214837	-0.314788	NS
FBgn0033884	CG13344	-0.456598	0.410021	NS
FBgn0026873	MED18	-0.174991	0.149104	NS
FBgn0014857	His3.3A	0.161777	-0.120893	NS
FBgn0039801	Npc2h	-0.290502	-0.260922	NS
FBgn0002868	MtnA	-0.232624	-0.787572	NS
FBgn0037770	Art4	-0.384432	0.688685	NS
FBgn0032295	CG12299	-0.249519	0.744191	NS
FBgn0030612	Dbct	0.0885063	-0.338159	NS
FBgn0029996	UbcE2H	0.088025	-0.122198	NS
FBgn0037960	mthl5	0.126163	-0.24735	NS
FBgn0033117	CG3358	-0.106198	0.24947	NS
FBgn0017448	CG2187	-0.764862	1.04035	NS
FBgn0036039	Naa60	-0.168644	0.338831	NS
FBgn0038923	mRpL35	-0.165829	0.125684	NS
FBgn0004510	Ets97D	-0.254126	0.246876	NS
FBgn0260750	Mulk	-0.0826847	0.11332	NS
FBgn0003330	Sce	-0.146444	0.167191	NS
FBgn0031060	Tcs4	-0.164139	0.172049	NS
FBgn0035475	CG10866	-0.0842792	0.162527	NS
FBgn0087013	Karybeta3	0.089347	-0.31457	NS
FBgn0038965	mats	-0.0587586	0.081015	NS
FBgn0032196	CG5708	-0.140202	0.116309	NS
FBgn0034962	MAN1	-0.230025	0.22444	NS
FBgn0037624	CG8223	-0.361134	0.276549	NS
FBgn0015000	betaggt-I	-0.0638222	-0.122606	NS
FBgn0034484	CG11044	0.403064	-0.219521	NS
FBgn0037911	CG10898	0.103631	0.19211	NS
FBgn0035036	CG4707	-0.160662	0.259203	NS
FBgn0036550	CG17026	-0.132707	-0.228761	NS
FBgn0287184	FASN3	0.193256	-0.236711	NS
FBgn0259164	CG42269	0.285364	0.230278	NS
FBgn0035385	FMRFaR	0.310683	-0.286722	NS
FBgn0034430	mip40	-0.186967	0.23667	NS
FBgn0037359	MED27	-0.204469	0.19045	NS
FBgn0052675	Tango5	0.0865495	-0.248311	NS
FBgn0261674	CG42709	0.108122	-0.273884	NS
FBgn0038307	mRpS10	-0.176608	0.313521	NS
FBgn0015600	toc	0.132729	0.153066	NS
FBgn0004870	bab1	0.298328	0.263976	NS
FBgn0040389	mRpL14	-0.232525	0.29783	NS
FBgn0036667	kud	-0.181935	0.162799	NS
FBgn0030006	CG17982	0.164873	-0.141793	NS
FBgn0046225	CG17230	-0.432186	0.485985	NS
FBgn0034379	CG15073	-0.0928978	0.115133	NS
FBgn0033122	CG17002	-0.296427	0.167536	NS
FBgn0010497	dmGlut	-0.656563	0.6147	NS
FBgn0266672	Sec8	-0.0648765	0.0629777	NS
FBgn0033973	HPS1	0.0802594	-0.18845	NS
FBgn0036096	CG8003	-0.0952302	0.137344	NS
FBgn0250868	CG42239	-0.151253	0.102339	NS
FBgn0040931	CG9034	-0.104463	0.168575	NS
FBgn0010406	RNaseX25	0.0703719	-0.156379	NS
FBgn0259481	Mob2	0.0888078	-0.215477	NS
FBgn0038214	CG9616	-0.652139	-0.598665	NS
FBgn0026148	CG12253	-0.629045	0.430036	NS
FBgn0031217	CG11377	-0.155846	-0.0836996	NS
FBgn0263111	cac	0.627252	0.346645	NS
FBgn0029092	ced-6	0.106021	-0.179102	NS
FBgn0001180	hb	-0.4231	0.409291	NS
FBgn0031834	CG13766	-0.206251	0.153576	NS
FBgn0263131	CG43373	0.337437	0.692722	NS
FBgn0034237	eIF3b	0.0914292	-0.0984599	NS
FBgn0032521	CG7110	-0.156727	0.349504	NS
FBgn0031717	Oscillin	-0.204222	-0.164389	NS
FBgn0284408	trol	-0.184553	-0.331006	NS
FBgn0031739	CG14005	-0.437738	0.408051	NS
FBgn0041205	key	0.0782457	-0.216234	NS
FBgn0031609	CG15443	0.0709047	-0.125446	NS
FBgn0002939	ninaD	-0.198412	-0.781637	NS
FBgn0034371	Ntan1	0.180002	0.169615	NS
FBgn0085434	NaCP60E	0.306413	0.220279	NS
FBgn0038432	CG14883	-0.135559	0.286779	NS
FBgn0036255	Atg12	-0.133941	-0.202567	NS
FBgn0033349	CG8243	-0.132079	0.179307	NS
FBgn0034035	CG8207	-0.208189	0.100335	NS
FBgn0033017	CG10465	-0.0772227	0.102638	NS
FBgn0037290	CG1124	-0.221472	-0.311163	NS
FBgn0015544	spag	-0.232436	0.224747	NS
FBgn0030055	Rubicon	0.077366	-0.107605	NS
FBgn0030793	Rai1	-0.369247	0.782757	NS
FBgn0030631	Prp5	-0.15413	0.154695	NS
FBgn0031106	Syx16	-0.156157	0.0878883	NS
FBgn0033716	Den1	-0.0990488	0.0763507	NS
FBgn0037364	Rab23	-0.564532	0.834302	NS
FBgn0020278	loco	0.113119	-0.240831	NS
FBgn0001612	Grip91	-0.24167	0.302366	NS
FBgn0031081	Nep3	0.359669	-0.226573	NS
FBgn0041004	CG17715	-0.11351	0.226312	NS
FBgn0035164	CG13901	-0.180619	0.287335	NS
FBgn0003996	w	-0.639768	1.00604	NS
FBgn0036381	CG8745	0.20169	-0.427601	NS
FBgn0002774	mle	0.0821341	0.102879	NS
FBgn0037679	Aduk	-0.128543	0.087036	NS
FBgn0259834	out	-0.141989	0.395074	NS
FBgn0005775	Con	0.489151	1.09161	NS
FBgn0263995	cpo	0.286299	-0.156813	NS
FBgn0261791	SNRPG	-0.209683	0.446764	NS
FBgn0085428	Nox	0.351235	0.462624	NS
FBgn0262563	CG43103	0.218572	-0.412672	NS
FBgn0027868	Nup107	-0.149826	0.219911	NS
FBgn0285917	sbb	-0.138133	0.225227	NS
FBgn0052076	Alg10	-0.104894	0.163215	NS
FBgn0035262	CG18171	0.424719	-0.304687	NS
FBgn0085410	TrissinR	0.401698	0.138854	NS
FBgn0003651	svp	0.123133	-0.171185	NS
FBgn0030603	CG5541	-0.055938	-0.0559468	NS
FBgn0037134	CG7407	-0.0864067	0.124394	NS
FBgn0040235	c12.1	-0.0853644	-0.134786	NS
FBgn0032870	CG2608	-0.0998813	0.162133	NS
FBgn0025697	santa-maria	0.15757	-0.505209	NS
FBgn0036756	Cln3	-0.364148	0.335732	NS
FBgn0039431	plum	0.661016	0.550325	NS
FBgn0016687	Nurf-38	-0.0815846	0.120052	NS
FBgn0259238	CG42336	-0.434423	0.204221	NS
FBgn0035370	Non2	-0.260413	0.224122	NS
FBgn0004893	bowl	0.220651	0.103182	NS
FBgn0085320	CG34291	0.348881	1.01019	NS
FBgn0014931	CG2678	-0.248438	0.364907	NS
FBgn0037878	CG6693	-0.185647	0.27617	NS
FBgn0031897	CG13784	0.142745	-0.377505	NS
FBgn0035850	Atg18a	0.0849834	-0.128399	NS
FBgn0250788	beta-Spec	0.193664	-0.144476	NS
FBgn0013435	Cdc2rk	-0.109544	-0.147727	NS
FBgn0085453	Mthfs	-0.208521	-0.222072	NS
FBgn0259721	CG42375	-0.161518	0.0778769	NS
FBgn0004607	zfh2	0.179602	-0.285227	NS
FBgn0015221	Fer2LCH	0.11283	-0.37056	NS
FBgn0283467	PolD3	-0.286431	0.262497	NS
FBgn0046113	GluRIIC	0.154986	0.15093	NS
FBgn0030506	DNAlig4	-0.133099	-0.122278	NS
FBgn0036354	Poc1	-0.355347	0.544056	NS
FBgn0041147	ida	-0.263362	0.228183	NS
FBgn0086378	Alg-2	-0.0671003	0.0860064	NS
FBgn0038478	cal1	-0.381845	0.473582	NS
FBgn0035890	CG13667	0.0916186	-0.317239	NS
FBgn0266487	CG45086	0.0701939	-0.1567	NS
FBgn0029835	CG5921	0.419315	0.483263	NS
FBgn0032240	CG17768	-0.152435	0.145273	NS
FBgn0051121	CG31121	0.189408	0.126714	NS
FBgn0261436	DhpD	0.0833159	-0.192549	NS
FBgn0027621	Pfrx	0.128609	-0.216751	NS
FBgn0039167	CG17786	0.1984	0.195043	NS
FBgn0034054	CG8366	-0.215703	0.483317	NS
FBgn0260407	mRpS23	-0.232918	0.158108	NS
FBgn0040096	lectin-33A	0.305036	0.922106	NS
FBgn0027594	drpr	0.320726	-0.220397	NS
FBgn0041629	Hexo2	-0.137253	-0.337182	NS
FBgn0033050	Pngl	0.124626	-0.113086	NS
FBgn0032707	CG10348	0.575033	0.211944	NS
FBgn0035806	PGRP-SD	-0.353606	-0.239576	NS
FBgn0000251	cad	-0.869023	1.36405	NS
FBgn0037536	CG2698	0.112436	-0.192452	NS
FBgn0027569	cert	0.13492	-0.271592	NS
FBgn0053080	CG33080	-0.357476	-0.258427	NS
FBgn0051431	CG31431	0.328434	-0.21066	NS
FBgn0031662	CG3792	-0.0886802	-0.101528	NS
FBgn0020616	SA	-0.118527	0.146628	NS
FBgn0266449	Kr-h2	-0.0803608	0.102757	NS
FBgn0034282	Mapmodulin	0.129614	0.141179	NS
FBgn0031988	CG8668	0.147077	0.135155	NS
FBgn0021767	org-1	0.212387	-0.20704	NS
FBgn0032022	CG14275	0.133937	-0.269924	NS
FBgn0265140	Meltrin	0.216371	-0.128687	NS
FBgn0052062	Rbfox1	0.248086	0.175722	NS
FBgn0016041	Tom40	-0.160546	0.194168	NS
FBgn0031505	ND-B14.5B	-0.181235	0.134522	NS
FBgn0034172	CG6665	0.0905983	-0.171274	NS
FBgn0038765	CG4424	-0.158996	-0.46317	NS
FBgn0033925	CG8617	-0.115432	-0.107738	NS
FBgn0031681	Pgant5	0.0952027	0.102529	NS
FBgn0030872	Ucp4A	-0.083115	0.127325	NS
FBgn0031247	CG11562	-0.148406	0.12746	NS
FBgn0033272	RagC-D	-0.103529	-0.0622991	NS
FBgn0036910	Cyp305a1	-0.234927	0.235115	NS
FBgn0003117	pnr	0.149454	-0.362657	NS
FBgn0030724	Nipsnap	0.10651	0.125481	NS
FBgn0026620	tacc	0.151955	-0.0983043	NS
FBgn0030871	CG8142	-0.366466	0.472128	NS
FBgn0037647	RagA-B	0.0764862	-0.211705	NS
FBgn0033265	coil	0.090741	-0.128698	NS
FBgn0039807	CG15546	0.453945	0.176528	NS
FBgn0020235	ATPsyngamma	-0.0983817	0.179654	NS
FBgn0025692	Lfg	-0.484625	-0.531756	NS
FBgn0030507	CG11164	-1.20021	1.52638	NS
FBgn0037846	CG6574	0.129565	0.101349	NS
FBgn0085208	CG34179	-0.301371	0.165938	NS
FBgn0005533	RpS17	-0.0917066	0.184714	NS
FBgn0027583	CG7601	-0.127357	-0.117049	NS
FBgn0063649	CG6006	0.415904	0.35302	NS
FBgn0032264	Lip4	0.290229	-0.282046	NS
FBgn0038108	CG7518	-0.129656	-0.233752	NS
FBgn0035995	CG3529	0.115916	-0.297939	NS
FBgn0264291	Det	-0.760756	0.590903	NS
FBgn0038966	pinta	0.16383	-0.164807	NS
FBgn0037379	CG10979	-0.194918	0.238218	NS
FBgn0038571	CG7215	-0.234361	0.0878536	NS
FBgn0000108	Appl	0.333395	0.238959	NS
FBgn0037817	Cyp12e1	0.175061	-0.161239	NS
FBgn0024366	CG11409	0.264377	1.44247	NS
FBgn0037368	CG1239	-0.465565	0.415308	NS
FBgn0030029	CG15343	0.184455	0.208199	NS
FBgn0002773	Mlc2	0.12725	0.159708	NS
FBgn0041186	Slbp	-0.355297	0.268163	NS
FBgn0035206	sturkopf	-0.0555659	-0.130385	NS
FBgn0039691	IntS11	-0.0963574	0.107679	NS
FBgn0035160	hng3	-0.294759	0.444764	NS
FBgn0038737	CG11447	0.0884609	-0.104379	NS
FBgn0266451	fau	0.166894	0.159727	NS
FBgn0025635	CG17829	-0.286011	0.224414	NS
FBgn0040207	kat80	-0.17001	0.319092	NS
FBgn0015218	eIF4E1	-0.0925269	0.140883	NS
FBgn0021906	RFeSP	-0.121295	0.142123	NS
FBgn0035906	GstO2	-0.0776006	0.232886	NS
FBgn0032731	Swip-1	0.193278	-0.16747	NS
FBgn0030558	CG1461	-0.177489	-0.638471	NS
FBgn0266284	Ns3	-0.0650511	-0.104663	NS
FBgn0034382	CG18609	0.235585	0.214887	NS
FBgn0031213	galectin	0.106729	-0.116998	NS
FBgn0086532	Spt-I	0.175761	-0.166921	NS
FBgn0262559	Mdh2	-0.102811	0.210825	NS
FBgn0033451	Marc	-0.191771	0.152332	NS
FBgn0259682	Jabba	-0.131668	-0.269272	NS
FBgn0032079	CG31886	0.198451	-0.241148	NS
FBgn0022787	Hel89B	0.22683	-0.158348	NS
FBgn0035696	Best2	0.336827	0.140628	NS
FBgn0031860	Daao2	-0.405196	-0.284965	NS
FBgn0037166	CG11426	0.375079	-0.243474	NS
FBgn0052195	CG32195	-0.128183	-0.209823	NS
FBgn0053548	SmydA-8	0.26759	-0.26679	NS
FBgn0054039	CG34039	-0.27338	0.123104	NS
FBgn0033690	EndoG	-0.196388	0.120224	NS
FBgn0036336	ste14	-0.258505	0.177175	NS
FBgn0036248	ssp	-0.0795453	-0.149152	NS
FBgn0037873	SdhC	-0.114909	0.279137	NS
FBgn0032801	CG10165	-0.111058	-0.241032	NS
FBgn0035600	Cyt-c1	-0.104529	0.12774	NS
FBgn0263986	cd	0.436996	-1.77606	NS
FBgn0053087	LRP1	-0.0767416	-0.185373	NS
FBgn0062413	Ctr1A	0.092965	-0.0893824	NS
FBgn0040259	Ugt302C1	0.127853	-0.293523	NS
FBgn0036846	MESR6	-0.12669	-0.083096	NS
FBgn0002948	nod	-0.425885	0.377949	NS
FBgn0028926	NC2beta	-0.154654	-0.104948	NS
FBgn0061359	Mvk	-0.0972124	0.267082	NS
FBgn0037251	CG9804	-0.253419	0.163762	NS
FBgn0025743	mbt	-0.193317	0.307669	NS
FBgn0036556	hzg	0.114192	-0.23386	NS
FBgn0263602	Tasp1	-0.155104	0.249899	NS
FBgn0036292	CG10646	0.0699452	-0.106659	NS
FBgn0022344	CG10340	-0.0607315	0.115415	NS
FBgn0020370	TppII	-0.0812001	0.087931	NS
FBgn0010435	emp	0.194094	-0.155492	NS
FBgn0037901	Exd2	0.066628	-0.0940596	NS
FBgn0050010	CG30010	-0.138394	0.134162	NS
FBgn0261349	Mst36Fb	-0.288926	-0.545909	NS
FBgn0032859	Arpc2	-0.189519	0.237374	NS
FBgn0040020	MED21	-0.3194	0.280918	NS
FBgn0050424	CG30424	-0.17446	-0.258046	NS
FBgn0263396	sqd	0.148216	0.115798	NS
FBgn0000056	Adhr	-0.266247	0.688826	NS
FBgn0035872	Cpsf6	-0.169003	0.197423	NS
FBgn0011603	ine	0.380582	0.208024	NS
FBgn0033571	Rpb5	-0.111974	0.273263	NS
FBgn0003116	pn	-0.151699	-0.133338	NS
FBgn0034243	Ns2	0.104831	-0.104924	NS
FBgn0036992	Hpd	0.172919	-0.342711	NS
FBgn0010313	corto	-0.0939765	0.122925	NS
FBgn0002930	nec	0.119131	-0.269356	NS
FBgn0037623	CG9801	0.18032	-0.173831	NS
FBgn0262146	MtnE	0.450192	-0.811191	NS
FBgn0053307	CG33307	-0.412455	0.405578	NS
FBgn0061360	CG33672	-0.0963281	0.267966	NS
FBgn0000355	Cp15	-1.10886	-2.79745	NS
FBgn0032161	CG4594	-0.244839	0.183663	NS
FBgn0260660	Mp	0.187641	-0.183802	NS
FBgn0032382	Mal-B2	0.268406	-0.24638	NS
FBgn0035231	Pcyt2	-0.174436	-0.281767	NS
FBgn0035122	mRpL17	-0.170095	0.111665	NS
FBgn0032724	CG10428	-0.0574841	-0.126057	NS
FBgn0026582	Hmg-2	-0.16521	-0.124125	NS
FBgn0037922	CG14711	-0.282058	0.186131	NS
FBgn0003557	Su(dx)	0.130441	-0.302064	NS
FBgn0051100	CG31100	0.353695	0.153631	NS
FBgn0259735	mtgo	0.13813	0.101663	NS
FBgn0035420	hob	-0.091711	0.116671	NS
FBgn0260008	UQCR-11	-0.126597	0.133974	NS
FBgn0034729	CG10344	-0.132487	0.35255	NS
FBgn0038098	CG7381	-0.316999	0.520899	NS
FBgn0036469	CG18649	0.50654	-0.331639	NS
FBgn0015240	Hr96	-0.141056	0.102617	NS
FBgn0266346	CngB	0.194765	-0.151985	NS
FBgn0003612	Su(var)2-10	-0.299667	0.267771	NS
FBgn0038427	ema	0.0464882	-0.0753352	NS
FBgn0250830	CG12547	-0.0785817	0.0720025	NS
FBgn0032167	CG5853	0.279255	-0.794204	NS
FBgn0027054	CSN4	-0.168379	0.125724	NS
FBgn0264090	CG43759	0.200675	0.559564	NS
FBgn0029711	Usf	0.074689	0.135277	NS
FBgn0032652	CG6870	-0.238511	0.717625	NS
FBgn0030090	fend	-0.410697	0.524789	NS
FBgn0043791	phu	0.353474	-0.666541	NS
FBgn0031284	PGAP2	-0.122076	0.171178	NS
FBgn0034400	CG15099	0.141949	-0.0773683	NS
FBgn0026361	Septin5	-0.41626	-0.480119	NS
FBgn0031695	Cyp4ac3	0.595781	-0.244586	NS
FBgn0032363	Dlg5	0.132299	0.133275	NS
FBgn0264694	mgr	-0.0938508	0.118549	NS
FBgn0033268	Obp44a	-0.609825	1.06318	NS
FBgn0034893	mRpL43	-0.0592676	0.0779014	NS
FBgn0025352	Mtpbeta	-0.0996634	-0.164978	NS
FBgn0019957	ND-42	-0.0796692	0.215546	NS
FBgn0263027	CG43322	-0.231704	-0.180778	NS
FBgn0046876	Obp83ef	0.227036	-0.205043	NS
FBgn0002023	Lim3	-0.23725	-0.610399	NS
FBgn0034733	CG4752	-0.0829289	0.115408	NS
FBgn0032818	CG10628	-0.0908039	0.229704	NS
FBgn0024432	Dlc90F	-0.100976	0.103092	NS
FBgn0032643	GCS2beta	-0.105287	0.125304	NS
FBgn0033918	CG8531	-0.11034	0.0873549	NS
FBgn0283480	Alp2	-1.61985	1.49298	NS
FBgn0037566	mRpL1	-0.160541	0.231726	NS
FBgn0038651	Epg5	0.0916628	-0.350101	NS
FBgn0030400	Pits	0.307118	0.200459	NS
FBgn0033019	CG10395	-0.269123	0.217217	NS
FBgn0260463	Unc-115b	-0.874645	2.66712	NS
FBgn0260936	scny	0.105559	-0.0864283	NS
FBgn0032123	Oatp30B	0.209962	-0.151813	NS
FBgn0050094	CG30094	-0.0663526	0.0836774	NS
FBgn0033752	CG8569	-0.166701	0.181297	NS
FBgn0043854	slam	-0.288828	0.474615	NS
FBgn0026737	CG6171	-0.322504	0.210694	NS
FBgn0031895	CG4497	-0.317157	0.312507	NS
FBgn0001125	Got2	0.127186	0.207636	NS
FBgn0033304	Cyp6a13	0.199011	-0.229082	NS
FBgn0022382	Pka-R2	0.27217	0.13559	NS
FBgn0267977	mh	-0.677011	0.893816	NS
FBgn0030328	Amun	-0.144884	0.161179	NS
FBgn0015035	Cyp4e3	0.587147	1.3177	NS
FBgn0037892	mRpL40	-0.0855984	0.109509	NS
FBgn0261850	Xpd	-0.164146	0.275669	NS
FBgn0032172	CG5850	0.0831054	-0.139014	NS
FBgn0085400	side-V	0.342863	0.486928	NS
FBgn0085290	CG34261	-0.676442	0.697415	NS
FBgn0038890	CG7956	0.122239	-0.108157	NS
FBgn0003141	pr	-0.112795	0.0806772	NS
FBgn0027537	Nup93-1	-0.189297	0.234916	NS
FBgn0037979	GCC185	0.114171	-0.0943959	NS
FBgn0019960	Mitofilin	-0.0653765	0.142117	NS
FBgn0250903	lmgA	-0.105095	0.162517	NS
FBgn0038198	Npc2b	0.253841	-0.173428	NS
FBgn0029161	slmo	-0.0658589	-0.18877	NS
FBgn0052641	CG32641	0.100603	-0.324926	NS
FBgn0261862	whd	0.330961	-0.174974	NS
FBgn0265541	CR44391	0.210964	-0.256465	NS
FBgn0002989	okr	-0.3165	0.247893	NS
FBgn0035690	CG10274	0.0713508	0.068813	NS
FBgn0030049	Trf4-1	-0.116615	-0.131592	NS
FBgn0040754	CG17059	-0.106263	0.121266	NS
FBgn0032479	CG16974	-0.0451006	0.0607114	NS
FBgn0034422	CG7137	-0.210295	0.314533	NS
FBgn0003512	Sry-delta	-0.351127	0.118069	NS
FBgn0033224	Nop17l	-0.0997754	0.111235	NS
FBgn0031947	CG7154	-0.269867	0.268662	NS
FBgn0040717	Nplp4	-0.293944	-0.288597	NS
FBgn0015546	spel1	0.0990368	0.159263	NS
FBgn0264006	dysc	0.400362	0.241767	NS
FBgn0002709	mei-218	-0.461074	0.444612	NS
FBgn0010774	Ref1	-0.0727749	-0.13148	NS
FBgn0260746	Ect3	0.690597	0.636929	NS
FBgn0037792	TAF1B	-0.279089	0.406322	NS
FBgn0033316	Gle1	-0.263147	0.203368	NS
FBgn0032453	CG6180	-0.19755	0.112674	NS
FBgn0263102	psq	0.119009	0.218647	NS
FBgn0032014	CG7840	-0.461234	0.296638	NS
FBgn0040260	Ugt37D1	0.142812	-0.259576	NS
FBgn0020445	E23	-0.341227	0.410667	NS
FBgn0266486	CG45085	-0.152786	0.136106	NS
FBgn0038588	CG7156	-0.1644	0.190962	NS
FBgn0031536	Cog3	0.0555798	-0.133917	NS
FBgn0015372	RabX1	0.0928548	-0.135852	NS
FBgn0267514	5.8SrRNA-Psi:CR45854	0.70195	0.257817	NS
FBgn0033872	CG6329	0.312541	0.243031	NS
FBgn0036990	mRpL15	-0.126147	0.259772	NS
FBgn0266098	rg	0.164456	0.316102	NS
FBgn0038855	CG5745	-0.113047	0.08738	NS
FBgn0000567	Eip74EF	0.381901	-0.157835	NS
FBgn0035234	CG12003	0.334902	0.272501	NS
FBgn0030806	CG13001	-0.36732	0.229986	NS
FBgn0264273	Sema2b	0.360613	0.330566	NS
FBgn0031184	CG14615	0.366904	-0.391465	NS
FBgn0052099	CG32099	0.12632	-0.107615	NS
FBgn0036752	Adgf-A	-0.210325	0.539493	NS
FBgn0034705	CG11170	0.26681	0.299777	NS
FBgn0085339	CG34310	-0.306206	0.361098	NS
FBgn0033738	DUBAI	0.0487316	-0.0580875	NS
FBgn0040942	CG12643	-0.200787	-0.292652	NS
FBgn0030369	Cyp318a1	0.158439	-0.303231	NS
FBgn0033155	Br140	-0.203654	0.271659	NS
FBgn0003016	osp	0.271077	0.266309	NS
FBgn0001280	janA	-0.206122	0.147473	NS
FBgn0015399	kek1	0.421034	0.944676	NS
FBgn0028552	gammaSnap1	0.0776973	-0.0888694	NS
FBgn0031711	CG6907	-0.191757	0.128267	NS
FBgn0052694	CG32694	0.344929	-0.162403	NS
FBgn0034814	CG9890	-0.0751922	0.0989226	NS
FBgn0040398	CG14629	-0.181926	-0.186745	NS
FBgn0037305	CG12173	-0.119762	0.103117	NS
FBgn0052442	Arv1	-0.0624151	-0.132191	NS
FBgn0042180	CG18870	-0.320791	0.455143	NS
FBgn0040093	lectin-46Ca	0.162382	-0.312539	NS
FBgn0038421	CG17931	-0.11394	0.086841	NS
FBgn0039766	CG15536	-0.128478	0.151765	NS
FBgn0035528	CG15012	0.0549817	-0.0696135	NS
FBgn0033448	hebe	0.371398	-0.343481	NS
FBgn0000032	Acph-1	-0.130462	0.189787	NS
FBgn0039073	CG4408	-1.36746	0.908456	NS
FBgn0037009	CG5104	0.11057	-0.0835016	NS
FBgn0029882	CG3226	-0.154607	0.181023	NS
FBgn0033713	CG8841	-0.114572	0.15165	NS
FBgn0062978	CG31808	0.346583	0.106494	NS
FBgn0040735	BomT2	0.21904	-0.576087	NS
FBgn0010328	woc	-0.221241	0.227872	NS
FBgn0034688	CG11474	-0.100515	-0.125706	NS
FBgn0035243	CG13926	-0.152591	0.102494	NS
FBgn0001092	Gapdh2	-0.128832	0.100013	NS
FBgn0028554	x16	-0.342328	0.36221	NS
FBgn0039109	CG10365	0.183861	-0.149013	NS
FBgn0033093	CG3270	-0.423073	0.456127	NS
FBgn0264895	RapGAP1	0.0988769	0.0839541	NS
FBgn0004595	pros	0.530389	0.23964	NS
FBgn0033203	CG2070	0.192056	-0.68259	NS
FBgn0036820	Grx1	-0.130722	0.127012	NS
FBgn0034194	CG15611	0.169407	-0.145293	NS
FBgn0034883	Eglp2	-0.437	-0.480326	NS
FBgn0027841	CstF64	-0.236208	0.205251	NS
FBgn0030660	CG8097	-0.269457	0.281681	NS
FBgn0259748	CG42397	-1.0623	-1.37635	NS
FBgn0085409	smal	0.247153	-0.204542	NS
FBgn0286516	aqz	0.154716	0.0985771	NS
FBgn0030877	Arp8	-0.192299	0.319407	NS
FBgn0036271	Pbgs	0.175988	0.171148	NS
FBgn0036959	CG6951	-0.112293	0.289917	NS
FBgn0032224	Sps2	-0.104355	0.159712	NS
FBgn0031610	Paris	-0.264629	0.209654	NS
FBgn0085810	CR41597	0.137977	0.145443	NS
FBgn0003044	Pcl	-0.321989	0.444634	NS
FBgn0028411	Nxt1	-0.162485	0.212816	NS
FBgn0086912	mbm	-0.2847	0.398628	NS
FBgn0036872	CG12519	-0.224354	0.319538	NS
FBgn0034354	GstE11	-0.263318	-0.902073	NS
FBgn0039889	Arl4	-0.143696	0.110665	NS
FBgn0015924	crq	0.0778523	-0.326416	NS
FBgn0033366	Ance-4	-0.274272	0.300451	NS
FBgn0030512	Nadsyn	-0.0832629	0.0807377	NS
FBgn0266491	SclA	0.213605	-0.200505	NS
FBgn0051313	CG31313	-0.298302	-0.762873	NS
FBgn0086694	Bre1	-0.224954	0.184674	NS
FBgn0039930	CG11077	-0.133176	0.132155	NS
FBgn0032889	CG9331	-0.316917	-0.161029	NS
FBgn0260474	CG30002	-0.540406	-0.636677	NS
FBgn0035532	CG15014	-0.15214	0.186388	NS
FBgn0031760	Tsp26A	0.455934	-0.143497	NS
FBgn0030196	Psf3	-0.291679	-0.134248	NS
FBgn0287844	Dhc1	0.428877	0.244626	NS
FBgn0027356	Amph	0.197573	-0.101349	NS
FBgn0027786	Mtch	-0.0672734	0.0573939	NS
FBgn0030357	Sclp	0.401982	-0.211307	NS
FBgn0036909	Ccdc58	-0.146736	0.173465	NS
FBgn0040466	Dlip2	-0.0832949	0.177275	NS
FBgn0032973	CG6675	0.165302	0.396831	NS
FBgn0035496	CG14990	-0.236882	-0.387525	NS
FBgn0035401	Alg2	-0.115017	-0.0986165	NS
FBgn0034808	CG9896	0.0995048	0.189262	NS
FBgn0003748	Treh	0.108196	0.0949435	NS
FBgn0005198	gig	0.0897105	-0.066672	NS
FBgn0038251	Hexim	-0.275299	0.152235	NS
FBgn0032218	CG5381	0.110468	-0.252274	NS
FBgn0030468	CG1622	-0.419487	0.246193	NS
FBgn0030365	Tango4	-0.229598	0.160487	NS
FBgn0086690	Plp	0.183893	-0.148311	NS
FBgn0036889	CG14100	-0.289928	0.196583	NS
FBgn0022349	CG1910	0.0912596	0.0877262	NS
FBgn0037551	Arl8	0.0714706	-0.102869	NS
FBgn0010741	Pfdn2	-0.0954091	0.117565	NS
FBgn0051380	CG31380	-0.234427	-1.02234	NS
FBgn0085444	mute	-0.179763	0.2207	NS
FBgn0027785	NP15.6	-0.128948	0.125787	NS
FBgn0030292	CG11752	-0.179695	0.134351	NS
FBgn0038662	Mpc1	-0.137486	0.130499	NS
FBgn0261573	CoRest	-0.193971	0.14614	NS
FBgn0040336	Seipin	-0.177598	-0.151812	NS
FBgn0036104	CG6418	-0.111294	0.114002	NS
FBgn0265045	Strn-Mlck	0.199353	0.219392	NS
FBgn0038692	Gdn1	-0.0937592	0.165466	NS
FBgn0033367	PPO2	0.17738	-0.94441	NS
FBgn0024986	CG3719	-0.068995	-0.165369	NS
FBgn0000721	for	0.0991264	-0.158697	NS
FBgn0013548	l(2)dtl	-0.547671	0.408913	NS
FBgn0034030	CG8192	0.750712	0.235624	NS
FBgn0029523	CR18275	0.154481	0.270394	NS
FBgn0038840	Grik	0.438492	0.218261	NS
FBgn0031263	Tspo	0.0766497	-0.183056	NS
FBgn0032814	CG10366	-0.204732	0.0875486	NS
FBgn0038337	CG6125	-0.855092	0.565705	NS
FBgn0015818	Spx	-0.218903	0.192337	NS
FBgn0025674	CycK	-0.107282	-0.0759981	NS
FBgn0035656	CG10479	0.110702	0.416084	NS
FBgn0033427	Smyd4-1	-0.239848	0.288749	NS
FBgn0030575	CG5321	-0.150313	-0.237442	NS
FBgn0032487	Ski6	-0.164366	0.227643	NS
FBgn0029873	CG3918	-0.155632	0.151993	NS
FBgn0032455	Pih1D1	-0.0931894	0.0697243	NS
FBgn0051201	GluRIIE	0.305973	0.126384	NS
FBgn0050016	CG30016	-0.96082	0.824769	NS
FBgn0265487	mbl	0.3057	0.127783	NS
FBgn0026616	alpha-Man-IIb	-0.284732	0.461576	NS
FBgn0051221	CG31221	0.605516	0.280502	NS
FBgn0024196	robl	-0.0702638	-0.059098	NS
FBgn0085370	Pde11	0.0889278	0.166724	NS
FBgn0035715	Ist1	0.168057	-0.217963	NS
FBgn0038815	CG5466	-0.544503	0.816378	NS
FBgn0030662	Chsy	-0.110274	0.360235	NS
FBgn0024150	Ac78C	0.426745	0.218459	NS
FBgn0024991	CG2694	-0.487058	0.326575	NS
FBgn0034229	CG4847	-0.222697	-0.180838	NS
FBgn0039349	Ssadh	-0.0750421	-0.0718361	NS
FBgn0035121	Tudor-SN	-0.10846	0.207767	NS
FBgn0000416	Sap-r	0.0704825	-0.188183	NS
FBgn0030396	CG2556	-0.546762	0.816358	NS
FBgn0036480	Cep135	-0.332446	0.314142	NS
FBgn0031379	CG7289	-0.0683827	0.0655513	NS
FBgn0085470	lmgB	-0.190343	0.129596	NS
FBgn0024187	syd	0.104008	-0.114752	NS
FBgn0025381	rush	0.113058	-0.171005	NS
FBgn0026257	cav	-0.53141	0.529713	NS
FBgn0033130	Tsp42Ei	0.205602	-0.12941	NS
FBgn0031435	Elba2	-0.897239	0.915592	NS
FBgn0030670	Pis	0.0808388	-0.113784	NS
FBgn0035120	wac	-0.489764	0.465563	NS
FBgn0260771	Larp7	-0.279737	0.207045	NS
FBgn0264075	tgo	-0.115607	0.11477	NS
FBgn0029079	icln	-0.432026	0.403202	NS
FBgn0039023	Nepl14	0.168478	-0.275786	NS
FBgn0035802	Pura	0.155226	0.161966	NS
FBgn0000489	Pka-C3	0.134699	-0.15271	NS
FBgn0085284	Blos3	-0.0698123	-0.113109	NS
FBgn0041182	Tep2	0.133939	-0.374843	NS
FBgn0263005	Chpf	-0.177383	0.275467	NS
FBgn0263911	COX8	-0.15614	0.134343	NS
FBgn0052816	CG32816	0.183273	0.512162	NS
FBgn0037028	CG3618	-0.176234	0.48241	NS
FBgn0016794	dos	0.153381	-0.203317	NS
FBgn0263025	HSPBAP1	-0.171241	0.119791	NS
FBgn0026199	myo	0.152736	-0.101451	NS
FBgn0036337	Adk2	0.0966388	-0.187581	NS
FBgn0034081	CG10731	-0.0655667	0.223684	NS
FBgn0037716	Son	-0.209099	0.18035	NS
FBgn0260779	GatA	-0.141421	0.120326	NS
FBgn0040734	BomS5	0.21705	-0.718347	NS
FBgn0033236	CG14764	-0.220884	0.154381	NS
FBgn0264386	Ca-alpha1T	0.270385	0.266648	NS
FBgn0034731	CG10384	-0.310839	-0.42976	NS
FBgn0013770	Cp1	0.277717	-0.14641	NS
FBgn0016715	Reg-2	-0.121654	-0.302788	NS
FBgn0024558	Dph5	-0.198767	0.300734	NS
FBgn0022710	Ac13E	0.185056	-0.185205	NS
FBgn0036173	CG7394	-0.0802319	0.0827055	NS
FBgn0032773	fon	0.110169	-0.385098	NS
FBgn0033547	CG12935	-0.212961	0.107144	NS
FBgn0039175	beta-PheRS	-0.132492	0.213486	NS
FBgn0016070	smg	-0.434391	0.414633	NS
FBgn0003137	Ppn	0.114779	-0.264073	NS
FBgn0027597	CG17712	-0.207123	0.151232	NS
FBgn0020513	Paics	0.306123	-0.158088	NS
FBgn0037262	MED31	-0.0818392	0.160483	NS
FBgn0037683	CG18473	-0.608215	-0.388549	NS
FBgn0263996	CG43739	-1.07652	-1.11064	NS
FBgn0032346	Csl4	-0.166546	0.266932	NS
FBgn0050421	Usp15-31	0.150015	-0.133304	NS
FBgn0038300	Mau2	-0.198012	0.116811	NS
FBgn0066303	CG33932	-0.0531329	0.150454	NS
FBgn0032321	YL-1	-0.091669	0.104597	NS
FBgn0025808	Rad17	-0.419344	0.298637	NS
FBgn0038860	Ice2	-0.261065	0.210482	NS
FBgn0036827	CG6843	-0.0849416	0.141762	NS
FBgn0040600	CG13631	0.147076	-0.130531	NS
FBgn0033673	CG8298	-0.226416	0.141524	NS
FBgn0286783	Etf-QO	0.0961282	-0.196792	NS
FBgn0053198	pen-2	-0.0888712	-0.100946	NS
FBgn0284255	Arpc4	-0.102107	0.104076	NS
FBgn0003268	rod	-0.284181	0.379559	NS
FBgn0034989	CG3356	0.057092	-0.102717	NS
FBgn0032640	Sgt	-0.061133	0.0924325	NS
FBgn0015039	Cyp9b2	-0.193893	-0.421937	NS
FBgn0036547	CG17032	-0.27996	1.31389	NS
FBgn0039337	MED28	-0.234178	0.121476	NS
FBgn0039419	CG12290	0.145322	0.180898	NS
FBgn0004913	Gnf1	-0.203718	0.219911	NS
FBgn0031774	CG9147	-0.0908063	-0.665632	NS
FBgn0019644	ATPsynB	-0.0908651	0.170921	NS
FBgn0032916	CG9257	-0.292577	0.145956	NS
FBgn0032213	CG5390	0.18991	-0.179919	NS
FBgn0038842	hdly	0.439851	-0.147452	NS
FBgn0035033	CG3548	-0.380565	0.287499	NS
FBgn0085450	Snoo	0.284941	-0.140483	NS
FBgn0020392	Nmt	-0.195954	0.161469	NS
FBgn0050000	GstT1	0.225441	-0.138711	NS
FBgn0260943	Rbp6	0.326604	0.214751	NS
FBgn0020372	TM4SF	0.243428	0.543038	NS
FBgn0046222	Wdr33	-0.168247	0.133288	NS
FBgn0034728	rad50	-0.142226	0.201987	NS
FBgn0035702	CG10147	0.158548	0.0904964	NS
FBgn0030991	CG7453	-0.129138	0.0806235	NS
FBgn0035473	mge	-0.0680148	-0.0850578	NS
FBgn0030122	Aladin	-0.21512	0.332416	NS
FBgn0030801	Rcp	-0.223152	0.152676	NS
FBgn0037236	Skp2	-0.435228	0.506217	NS
FBgn0013303	Nca	-0.0645904	0.0837419	NS
FBgn0052407	CG32407	-0.151672	-0.409835	NS
FBgn0034062	CG8388	0.172861	-0.139922	NS
FBgn0004926	eIF2beta	-0.0522937	0.0807755	NS
FBgn0032986	CG3262	0.0531246	0.0754043	NS
FBgn0263121	Prosalpha1	0.549439	0.441806	NS
FBgn0032634	Rpb11	-0.138352	0.319065	NS
FBgn0038223	Afti	-0.137197	0.199771	NS
FBgn0037723	SpdS	-0.34447	0.202655	NS
FBgn0038420	CG10311	-0.114458	-0.577401	NS
FBgn0039112	SdhD	-0.0936395	0.121185	NS
FBgn0031091	Phf7	-0.83721	0.919487	NS
FBgn0033929	Tfb1	-0.106962	0.169243	NS
FBgn0086129	snama	-0.1526	0.125843	NS
FBgn0031037	CG14207	-0.110395	-0.145703	NS
FBgn0034093	CG15706	-0.0856582	-0.06795	NS
FBgn0038488	m-cup	0.0713574	-0.426957	NS
FBgn0261955	kdn	0.115374	0.163077	NS
FBgn0036875	CG9449	0.348512	-0.20395	NS
FBgn0051352	Unc-115a	0.160161	-0.186321	NS
FBgn0011592	fra	0.200348	1.0981	NS
FBgn0015553	tos	-0.708204	0.844158	NS
FBgn0034021	CG8180	-0.612744	0.473848	NS
FBgn0021847	Ttc7	-0.0795932	0.0598246	NS
FBgn0031495	GABPI	-0.0844312	-0.088033	NS
FBgn0262619	DNAlig1	-0.472708	0.681942	NS
FBgn0030605	ND-B18	-0.0884166	0.113098	NS
FBgn0033313	Cirl	0.135155	-0.129653	NS
FBgn0051875	CG31875	-0.47861	0.656229	NS
FBgn0035148	CG3402	-0.362273	0.224652	NS
FBgn0039293	Alg9	-0.153234	0.24138	NS
FBgn0039977	Spf30	-0.0643555	-0.0574174	NS
FBgn0039856	CG1774	-0.22134	0.173823	NS
FBgn0025639	Hmt4-20	-0.155063	0.181134	NS
FBgn0029175	sotv	-0.152339	-0.0703963	NS
FBgn0041775	tral	-0.243577	0.323143	NS
FBgn0027579	mino	0.222866	-0.135762	NS
FBgn0035878	CG7182	-0.232574	0.169027	NS
FBgn0023180	Orc6	-0.480406	0.458479	NS
FBgn0052533	CG32533	0.0545685	-0.102564	NS
FBgn0036488	CG6878	-0.150236	0.0908867	NS
FBgn0031436	ND-B17.2	-0.134358	0.130404	NS
FBgn0032720	mRpL13	-0.0923421	0.275529	NS
FBgn0037090	Est-Q	-0.207956	-0.793685	NS
FBgn0261836	Msp300	0.121647	-0.167906	NS
FBgn0039357	CG4743	-0.101753	0.633858	NS
FBgn0259168	mnb	0.19395	-0.129211	NS
FBgn0264326	PolE1	-0.519584	0.63242	NS
FBgn0040309	Jafrac1	-0.186622	-0.121478	NS
FBgn0027561	CG18659	0.134767	-0.195773	NS
FBgn0035308	CG15822	0.357163	0.302637	NS
FBgn0035815	Snmp2	0.252887	-0.426635	NS
FBgn0052484	Sk2	-0.20217	-0.0771555	NS
FBgn0039155	Kal1	-0.225911	0.245049	NS
FBgn0033889	CG6701	0.111601	-0.101579	NS
FBgn0031544	CG17593	-0.0473361	0.0700764	NS
FBgn0036695	Papst2	-0.069815	-0.114498	NS
FBgn0034245	UQCR-6.4	-0.210077	0.125028	NS
FBgn0046706	Haspin	-0.216529	0.429374	NS
FBgn0028499	CG7985	-0.281082	0.647321	NS
FBgn0037719	bocks	-0.044969	-0.0787211	NS
FBgn0032231	CG5056	0.0849751	-0.296985	NS
FBgn0031039	Shawn	-0.0488013	-0.056229	NS
FBgn0030028	Corp	-0.364	0.488438	NS
FBgn0264574	Glut1	-0.228323	0.196289	NS
FBgn0037831	Cap-H2	0.12334	0.294942	NS
FBgn0039563	CG4951	-0.407221	0.281877	NS
FBgn0030739	SWIP	0.128428	-0.089982	NS
FBgn0023129	aay	0.112722	0.417073	NS
FBgn0262473	Tl	-0.0863086	-0.151923	NS
FBgn0262737	mub	-0.0700029	0.16548	NS
FBgn0039145	CG6000	-0.1558	0.0919987	NS
FBgn0037330	mRpL44	-0.10673	0.132515	NS
FBgn0034908	CG5543	-0.194679	0.157538	NS
FBgn0034262	swi2	-0.371421	0.478434	NS
FBgn0031762	CG9098	0.296833	1.06994	NS
FBgn0027513	ana2	-0.768534	0.89098	NS
FBgn0035817	CG7409	-0.24175	0.201603	NS
FBgn0260499	qvr	0.392849	0.213973	NS
FBgn0035210	msd5	-0.496758	0.890112	NS
FBgn0035025	uri	-0.230915	0.245365	NS
FBgn0031779	CG9175	-0.1028	-0.0772135	NS
FBgn0051674	CG31674	-0.335653	-0.216989	NS
FBgn0033127	Tsp42Ef	0.1019	-0.244375	NS
FBgn0025549	unc-119	-0.175127	0.166704	NS
FBgn0034304	CG5742	-0.195987	0.213822	NS
FBgn0029507	Tsp42Ed	0.184885	-0.345281	NS
FBgn0029837	Tsp5D	0.219294	0.265575	NS
FBgn0034399	CG15083	0.104449	0.471526	NS
FBgn0053147	Hs3st-A	0.488425	0.225644	NS
FBgn0037279	CG1129	0.0792957	-0.283031	NS
FBgn0086710	RpL30	-0.0709752	0.0922951	NS
FBgn0034299	CG5757	-0.313506	0.41506	NS
FBgn0034118	Nup62	-0.165145	0.255973	NS
FBgn0033188	Drat	0.172156	-0.296623	NS
FBgn0035020	CG13585	-0.0691661	-0.0938324	NS
FBgn0250732	gfzf	-0.0729222	0.210555	NS
FBgn0263601	mib1	0.272538	-0.189082	NS
FBgn0040732	CG16926	0.139422	-0.258969	NS
FBgn0050026	CG30026	0.209343	-0.190911	NS
FBgn0038147	CCHa2	-0.17554	-0.696818	NS
FBgn0038313	CG4338	-0.128362	0.334313	NS
FBgn0035888	CG7120	0.177132	-0.116475	NS
FBgn0038426	mRpS33	-0.130404	-0.122333	NS
FBgn0030137	CG15317	-0.222686	0.202609	NS
FBgn0061476	Zwilch	-1.05	0.797083	NS
FBgn0032006	Pvr	0.295672	-0.179851	NS
FBgn0032997	CG17486	-0.0548633	0.0632033	NS
FBgn0037981	Spt3	-0.128023	-0.0911645	NS
FBgn0005695	gcl	-0.319955	0.207357	NS
FBgn0028708	Mst85C	-0.24182	0.099252	NS
FBgn0039273	shams	-0.238388	0.19733	NS
FBgn0086656	shrb	0.153312	-0.088339	NS
FBgn0033740	dgt5	-0.778216	0.717863	NS
FBgn0010398	Lrr47	-0.311462	0.215958	NS
FBgn0003410	sina	-0.0748809	0.16069	NS
FBgn0033081	geminin	-0.546916	0.375219	NS
FBgn0032195	CG4908	-0.141736	0.530277	NS
FBgn0051115	CG31115	0.28097	-0.254912	NS
FBgn0035959	CG4911	-0.0882934	0.240806	NS
FBgn0010356	Taf5	-0.173996	0.0850269	NS
FBgn0004643	Zw10	-0.304018	0.194881	NS
FBgn0043578	PGRP-SB1	-0.365239	-1.00639	NS
FBgn0000964	tj	-0.589376	0.431628	NS
FBgn0031881	MME1	0.174079	-0.270342	NS
FBgn0030228	BTBD9	-0.0965251	0.111173	NS
FBgn0030943	Nup35	-0.412778	0.391254	NS
FBgn0033842	cbc	-0.11222	-0.229867	NS
FBgn0051320	HEATR2	-0.141788	0.40615	NS
FBgn0040601	CG13643	0.849429	0.305527	NS
FBgn0001149	GstD1	-0.417706	-0.123923	NS
FBgn0011659	Mlh1	-0.312657	0.479952	NS
FBgn0033439	CG1773	-0.524689	-0.470607	NS
FBgn0032467	Ube4B	0.0496513	-0.0538226	NS
FBgn0031975	Tg	-0.0590953	-0.130754	NS
FBgn0039044	p53	-0.114321	0.194046	NS
FBgn0264491	how	0.160171	-0.088178	NS
FBgn0038290	CG6912	-0.140578	-0.819897	NS
FBgn0026593	CG5707	-0.493301	-0.208175	NS
FBgn0038805	TFAM	-0.0781072	0.176243	NS
FBgn0029708	CG3556	0.368542	0.238587	NS
FBgn0010611	Hmgs	0.198093	-0.204109	NS
FBgn0039233	CG7006	-0.105216	0.1419	NS
FBgn0033183	CG1620	-0.151499	0.33862	NS
FBgn0039644	rdog	0.213207	0.135552	NS
FBgn0051133	Slimp	-0.115994	-0.137425	NS
FBgn0053096	CG33096	-0.132734	0.111067	NS
FBgn0000611	exd	0.0606004	-0.0800889	NS
FBgn0042112	mRpL36	-0.0853966	0.110292	NS
FBgn0037643	ScsbetaA	0.207911	-0.154812	NS
FBgn0283468	slmb	-0.141671	0.0840326	NS
FBgn0020270	mre11	-0.236935	0.249989	NS
FBgn0035693	CG8219	0.170711	0.331811	NS
FBgn0032229	ClpP	-0.0634461	0.0996357	NS
FBgn0030314	CG11696	-0.235922	0.166058	NS
FBgn0027601	pdgy	0.132779	0.132832	NS
FBgn0038788	Sirt2	0.055735	-0.145351	NS
FBgn0086605	CG9853	-0.158821	0.0742449	NS
FBgn0026778	Rad1	-0.616662	0.299905	NS
FBgn0052579	CG32579	-0.0460878	0.0577034	NS
FBgn0032157	Etl1	-0.238691	0.179713	NS
FBgn0000524	dx	-0.396384	0.246838	NS
FBgn0036857	Aldh7A1	-0.471278	-0.175157	NS
FBgn0000139	ash2	-0.174265	-0.0858018	NS
FBgn0085408	Shrm	0.310056	-0.237639	NS
FBgn0031886	Nuf2	-0.645581	0.922172	NS
FBgn0034420	CG10737	0.0935814	-0.247585	NS
FBgn0037535	PIG-H	-0.377855	0.199413	NS
FBgn0032688	CG15160	-0.068471	0.124462	NS
FBgn0004419	me31B	-0.424802	0.426793	NS
FBgn0031598	Vps53	0.0827454	-0.272576	NS
FBgn0013762	Cdk5	0.0609305	-0.167727	NS
FBgn0038080	CG12279	-0.10446	0.100823	NS
FBgn0039265	CG11790	-0.0392462	0.0834878	NS
FBgn0040773	COX7C	-0.129763	0.114125	NS
FBgn0262518	Rab8	0.0542916	-0.100403	NS
FBgn0028952	Kebab	-0.398184	0.955094	NS
FBgn0032251	Nse4	-0.274878	0.155705	NS
FBgn0062442	Cisd2	-0.119795	0.0869926	NS
FBgn0036973	Rbbp5	-0.0756194	-0.0799065	NS
FBgn0044871	Gos28	-0.0446054	-0.0664576	NS
FBgn0033624	CG12384	-0.0685887	-0.0711142	NS
FBgn0264556	Gr39a	0.310562	-0.273282	NS
FBgn0035816	CG13685	0.376583	0.234564	NS
FBgn0029113	Uba2	-0.170548	0.23797	NS
FBgn0031636	CG12194	0.419606	-0.367349	NS
FBgn0038072	CG6225	0.249536	-0.139031	NS
FBgn0039459	IntS12	-0.438572	0.288955	NS
FBgn0015359	CG2034	-0.196264	0.15161	NS
FBgn0033782	sug	-0.130019	-0.184141	NS
FBgn0019637	Atu	-0.186874	0.140128	NS
FBgn0039169	Spps	-0.083969	0.218277	NS
FBgn0003495	spz	-0.126624	0.138216	NS
FBgn0262730	dtn	-0.143372	0.320137	NS
FBgn0261983	l(2)gd1	0.0854066	-0.17607	NS
FBgn0266174	pre-mod(mdg4)-L	0.279122	0.287358	NS
FBgn0037935	CG6834	-0.298208	0.229264	NS
FBgn0015271	Orc5	-0.43834	0.775842	NS
FBgn0037756	CG8507	-0.0817004	0.0958318	NS
FBgn0031188	CG14613	-0.0875185	0.203756	NS
FBgn0250786	Chd1	-0.0653394	0.107792	NS
FBgn0083940	RhoU	0.326821	-0.191153	NS
FBgn0032956	Cul2	0.0921611	0.0595455	NS
FBgn0036331	CR14117	-0.0999126	0.158437	NS
FBgn0013771	Cyp6a9	0.115753	-0.584634	NS
FBgn0053144	CG33144	0.0813403	0.111794	NS
FBgn0004050	z	-0.210511	0.118117	NS
FBgn0034199	Gbp1	0.137367	-0.466088	NS
FBgn0035209	msd1	-0.659689	0.842142	NS
FBgn0038829	CG17271	-0.0666672	-0.0931118	NS
FBgn0014879	Set	-0.26297	0.288228	NS
FBgn0010768	sqz	-0.138548	0.44393	NS
FBgn0040395	Unc-76	0.0903619	-0.410567	NS
[truncated: 6,702 more rows]

## Sheet: (B) Plastic vs Evol Metabolome
Metabolite	LogFC_Diet	LogFC_Regime	Category
ISOVALERYLCARNITINE	0.512017	0.882038	q < 0.1
KYNURENINE	-1.19268	-1.19478	q < 0.1
LYSINE	0.40859	-0.7748	q < 0.1
PANTOTHENATE	-0.39806	-0.57851	q < 0.1
AGMATINE	0.346216	0.487796	q < 0.1
LACTATE	-0.49184	-0.31948	q < 0.1
GAMMA-AMINOBUTYRATE (GABA)	0.284315	0.451746	q < 0.1
ETHANOLAMINE	-0.35515	-0.27115	q < 0.1
GLYCERATE	0.940373	0.258517	q < 0.1
OCTANOYLCARNITINE	0.645566	1.05116	q < 0.1
HEXANOYLCARNITINE	0.412369	0.623548	q < 0.1
GUANIDINOSUCCINATE	0.234548	0.344872	q < 0.1
2-/3-PHOSPHOGLYCERATE	0.585316	0.37857	q < 0.1
NAD	-0.35128	-0.16474	q < 0.1
O-PHOSPHOETHANOLAMINE	-0.27535	0.467572	q < 0.1
ISOLEUCINE	-0.17198	-0.28842	q < 0.1
N-ACETYLASPARTATE	0.226244	0.314011	q < 0.1
HISTIDINOL	0.42269	-0.5746	q < 0.1
STEAROYLCARNITINE	-0.28446	-0.21909	q < 0.1
URIDINE DIPHOSPHATE HEXOSE	0.568653	0.540025	q < 0.1
SUCCINATE	-0.51366	-0.25264	q < 0.1
ASPARTATE	0.70543	0.479974	q < 0.1
4-GUANIDINOBUTANOATE	0.500732	-0.48542	q < 0.1
DEOXYCARNITINE	0.476647	-0.4964	q < 0.1
NICOTINAMIDE	-0.18028	-0.40858	q < 0.1
NICOTINATE (NIACIN)	-0.48493	-0.3001	q < 0.1
SERINE	0.110243	0.223106	q < 0.1
DECANOYLCARNITINE	0.459834	0.953581	q < 0.1
URIDINE	-0.44367	-0.2314	q < 0.1
NADP	-0.16995	-0.25642	q < 0.1
LAUROYLCARNITINE	0.039116	0.582346	NS
N-ACETYLGLUTAMATE	-0.02705	0.516176	NS
ASPARAGINE	0.101959	0.300291	NS
GLYCERALDEHYDE 3-PHOSPHATE	-0.03299	0.374553	NS
TRYPTOPHAN	-0.01647	-0.39754	NS
GLUTAMINE	0.094684	0.289276	NS
ADENOSINE	0.092931	-0.35342	NS
ADENINE	0.17551	-0.36042	NS
HISTIDINE	-0.06115	-0.59375	NS
HYPOXANTHINE	0.059793	-1.01236	NS
KYNURENATE	0.163141	-0.80251	NS
CYSTATHIONINE	0.027004	-0.44205	NS
DEOXYGUANOSINE	0.109197	-0.99013	NS
BETA-ALANINE/SARCOSINE	-0.10367	0.286506	NS
METHYLTHIOADENOSINE	-0.30252	-0.487	NS
GLYCEROL 3-PHOSPHATE	-0.24598	0.365334	NS
METHIONINE	-0.09812	-0.24327	NS
GUANOSINE	-0.01805	-0.44448	NS
ADP	-0.01166	0.259633	NS
VALINE	-0.09436	-0.21979	NS
GUANINE	0.241832	-0.68751	NS
FAD	-0.05428	-0.18414	NS
THREONINE/HOMOSERINE	0.097125	-0.19891	NS
RAFFINOSE	-0.28217	-0.52129	NS
TREHALOSE	-0.12604	-0.17829	NS
LEUCINE	-0.08599	-0.17897	NS
N-METHYLASPARTATE	0.096593	0.198809	NS
CITRULLINE	0.471375	0.156784	NS
ALANINE	-0.58065	-0.16473	NS
CITICOLINE	-0.69769	-0.07274	NS
CDP-ETHANOLAMINE	-0.59548	-0.01241	NS
RIBOSE 5-PHOSPHATE	-0.45458	0.094592	NS
GLUCOSE 6-PHOSPHATE	-0.2455	-0.03743	NS
OXOGLUTARATE	-0.22185	-0.04846	NS
MYRISTOYLCARNITINE	-0.33694	0.085235	NS
HISTAMINE	0.254831	-0.01808	NS
UREIDOPROPIONATE	0.518816	0.001823	NS
PROLINE	-0.21828	-0.00932	NS
PALMITOYLCARNITINE	-0.36863	-0.24665	NS
INOSINE	-0.4814	-0.09725	NS
4-IMIDAZOLEACETATE	0.253518	-0.0751	NS
GUANOSINE DIPHOSPHATE MANNOSE	-0.23879	-0.066	NS
N-ALPHA-ACETYLLYSINE	0.419581	-0.16035	NS
CADAVERINE	0.415845	-0.27717	NS
PYRUVATE	-0.29185	-0.13417	NS
NAADP	-0.20382	-0.09375	NS
PHENYLALANINE	-0.13803	-0.11792	NS
CITRATE	0.362786	-0.06719	NS
MALATE	0.248968	-0.08821	NS
NADPH	-0.20736	0.008942	NS
N,N,N-TRIMETHYLLYSINE	0.336065	-0.10448	NS
FRUCTOSE 6-PHOSPHATE	-0.15351	0.078197	NS
CARNITINE	-0.13356	-0.01881	NS
TAURINE	0.213777	-0.05489	NS
GLUTAMATE	-0.14664	0.115567	NS
PROPIOYLCARNITINE	0.339154	0.166402	NS
ISOCITRATE	0.309434	-0.0323	NS
SUCROSE	0.291439	0.20333	NS
PHOSPHOENOLPYRUVATE	0.502075	0.472158	NS
RIBOFLAVIN	-0.45856	0.550508	NS
ACETYLCARNITINE	-0.04716	0.045962	NS
URACIL	-0.24101	0.272171	NS
BUTYRYLCARNITINE	0.097747	0.14535	NS
TYROSINE	0.181902	0.097652	NS
CHOLINE	0.099653	0.145202	NS
4-HYDROXY-PROLINE	0.256361	0.162778	NS
HYDROXYKYNURENINE	-0.54312	-0.17634	NS
PUTRESCINE	0.097881	-0.11466	NS
CREATINE	0.224521	0.2427	NS
SALSOLINOL	0.331091	-0.28578	NS
TRIMETHYLAMINE	0.077832	0.119266	NS
CYTOSINE	-0.15411	0.207463	NS
URATE	0.176281	-0.04006	NS
CYTIDINE	-0.12581	0.153609	NS
N,N-DIMETHYLARGININE	-0.05311	0.28858	NS
DIETHANOLAMINE	-0.08306	0.114201	NS
THIAMINE	-0.09988	0.195221	NS
URIDINE 5'-DIPHOSPHATE	-0.09863	0.238127	NS
ARGININE	-0.0283	0.061054	NS
GLYCINE	0.024825	-0.02519	NS
LACTOSE/SUCROSE	0.006396	-0.02028	NS
BIOTIN	0.063632	-0.31933	NS
URIDINE DIPHOSPHATE-N-ACETYLHEXOSAMINE	-0.00999	-0.05882	NS
