# Supplementary material for: Evolutionary adaptation to juvenile malnutrition impacts adult metabolism and impairs adult fitness in Drosophila
Source: eLife. 2023 Oct 17;12:e92465. doi: 10.7554/eLife.92465 (PMC10637773; doi:10.7554/eLife.92465)
Supplement: Figure 5—source data 1. [file elife-92465-fig5-data1.xlsx]

## Sheet: Legend
Figure 5 - source data 1
Relationship between corresponding differnences in gene expression and metabolite abundance in the larvae and adults
(A) Data for Figure 5A
(B) Data for Figure 5B
(C) Data for Figure 5 - figure supplement 1

## Sheet: (A) Expression Regime Lar  v Ad
FBgn	GeneSymbol	Log2FC_Regime_Larvae	Log2FC_Regime_Adults	Category
FBgn0050344	CG30344	-0.66915	-0.932994	q < 0.1
FBgn0031773	Fbw5	-0.507143	-0.327802	q < 0.1
FBgn0031774	CG9147	-0.638641	-0.661638	q < 0.1
FBgn0038484	CG5246	-0.979019	-2.4391	q < 0.1
FBgn0036770	Prestin	-0.373265	-0.627295	q < 0.1
FBgn0039357	CG4743	0.46069	0.688043	q < 0.1
FBgn0004087	Dhfr	-0.595787	-0.571855	q < 0.1
FBgn0263776	CG43693	-0.821711	0.442526	q < 0.1
FBgn0038290	CG6912	-1.63669	-0.888157	q < 0.1
FBgn0036000	CG3434	-0.641934	-0.678849	q < 0.1
FBgn0039969	Fis1	-0.260266	-0.313992	q < 0.1
FBgn0262169	magu	-0.230596	-0.355602	q < 0.1
FBgn0038972	CG7054	-0.461366	-0.935139	q < 0.1
FBgn0020762	Atet	-0.425505	-0.685609	q < 0.1
FBgn0035999	CG3552	-0.688383	-0.697948	q < 0.1
FBgn0042641	frc	-0.23783	-0.480933	q < 0.1
FBgn0015037	Cyp4p1	-1.21758	-1.74352	q < 0.1
FBgn0035499	Chd64	-0.255287	-0.448417	q < 0.1
FBgn0035247	Mettl2	-0.339897	-0.351628	q < 0.1
FBgn0027578	Nepl21	-0.574875	-0.48679	q < 0.1
FBgn0027657	glob1	-1.09462	-1.05377	q < 0.1
FBgn0035968	Slc45-1	-0.341033	0.682823	q < 0.1
FBgn0036806	Cyp12c1	-0.388553	-0.682061	q < 0.1
FBgn0038301	CG6654	-1.00481	-0.448112	q < 0.1
FBgn0029118	ScsbetaG	-0.320936	-0.5784	q < 0.1
FBgn0026619	Taz	-0.262385	-0.397987	q < 0.1
FBgn0003388	shd	-0.349493	-0.675514	q < 0.1
FBgn0050345	CG30345	-0.322376	-0.643736	q < 0.1
FBgn0263132	Cht6	-0.317397	1.15165	q < 0.1
FBgn0035998	CG3437	-0.58674	-0.407484	q < 0.1
FBgn0051380	CG31380	-0.751624	-1.16929	q < 0.1
FBgn0032116	Mco1	-0.252027	-0.685669	q < 0.1
FBgn0034365	CG5335	-0.414415	-0.259155	q < 0.1
FBgn0033809	CG4630	-0.491851	-0.762403	q < 0.1
FBgn0260388	CG42514	-0.253334	-0.628738	q < 0.1
FBgn0034909	CG4797	-0.499003	-0.700134	q < 0.1
FBgn0015033	Cyp4d8	-1.07294	-0.885862	q < 0.1
FBgn0033627	CG13204	0.341661	0.897865	q < 0.1
FBgn0024366	CG11409	0.816482	1.65048	q < 0.1
FBgn0039291	CG13663	-0.191114	-0.410212	q < 0.1
FBgn0031710	Vps52	-0.305471	-0.238237	q < 0.1
FBgn0260799	p120ctn	-0.136499	-0.252808	q < 0.1
FBgn0036547	CG17032	0.441517	1.3284	q < 0.1
FBgn0015924	crq	-0.361682	-0.371416	q < 0.1
FBgn0063497	GstE3	-0.593814	-0.959968	q < 0.1
FBgn0035086	CG12851	0.336879	1.06235	q < 0.1
FBgn0262717	Skeletor	-0.39749	1.13829	q < 0.1
FBgn0030048	CG12112	-1.18844	-1.2552	q < 0.1
FBgn0033372	CG13742	0.61916	1.98167	q < 0.1
FBgn0025391	Scgdelta	0.302968	1.29199	q < 0.1
FBgn0037890	CG17734	-0.323625	-0.389888	q < 0.1
FBgn0035989	Tat	0.31133	0.312803	q < 0.1
FBgn0053002	mRpL27	0.179173	0.42153	q < 0.1
FBgn0035763	mrva	-0.231535	-0.286022	q < 0.1
FBgn0024989	CG3777	-0.237332	0.918579	q < 0.1
FBgn0033395	Cyp4p2	-0.871755	-1.29192	q < 0.1
FBgn0031950	Herp	-0.222787	-0.607897	q < 0.1
FBgn0032005	Snx6	-0.176294	-0.390856	q < 0.1
FBgn0038194	Cyp6d5	-0.620848	-0.497664	q < 0.1
FBgn0002567	Rab32	-0.165989	0.471368	q < 0.1
FBgn0264746	CG44004	-0.470753	-1.72974	q < 0.1
FBgn0051694	Ifrd1	-0.159587	-0.228042	q < 0.1
FBgn0038651	Epg5	-0.382349	-0.380456	q < 0.1
FBgn0262867	Ptr	1.59714	0.51076	q < 0.1
FBgn0029766	CG15784	-0.619688	-1.02032	q < 0.1
FBgn0036988	CG5262	-0.283136	-0.300196	q < 0.1
FBgn0025885	Inos	-0.396308	-0.515902	q < 0.1
FBgn0087013	Karybeta3	-0.172006	-0.232728	q < 0.1
FBgn0002868	MtnA	-0.356576	-0.766669	q < 0.1
FBgn0030558	CG1461	-0.58284	-0.72197	q < 0.1
FBgn0039316	CG11893	-2.12075	-1.78191	q < 0.1
FBgn0036891	CG9372	-0.328358	-0.510681	q < 0.1
FBgn0015222	Fer1HCH	-0.515489	-0.357858	q < 0.1
FBgn0284435	tyn	0.232849	0.560138	q < 0.1
FBgn0039321	CG10550	-0.415149	-0.4745	q < 0.1
FBgn0029990	CG2233	-0.44629	-0.701578	q < 0.1
FBgn0053093	CG33093	-0.812761	-1.23177	q < 0.1
FBgn0033205	CG2064	0.70036	0.837695	q < 0.1
FBgn0033184	mEFTu2	0.253259	0.41762	q < 0.1
FBgn0040964	CG18661	0.502823	0.634855	q < 0.1
FBgn0050361	mtt	0.242471	2.16554	q < 0.1
FBgn0264302	wrm1	0.2557	0.372227	q < 0.1
FBgn0004636	Rap1	-0.11428	-0.353904	q < 0.1
FBgn0031053	CG14223	0.353952	0.757517	q < 0.1
FBgn0264750	CG44008	-0.64523	-0.399897	NS
FBgn0030594	fiz	-2.36901	-1.50403	NS
FBgn0038292	CG3987	-1.14959	-0.832905	NS
FBgn0034602	Lapsyn	-0.556453	-0.294475	NS
FBgn0261862	whd	-0.559345	-0.00722812	NS
FBgn0039430	CG5455	-0.512736	-0.161359	NS
FBgn0039543	CROT	-0.722772	-0.0115806	NS
FBgn0029608	CG3091	-0.769321	0.149124	NS
FBgn0015576	alpha-Est8	-1.27174	-0.164914	NS
FBgn0037090	Est-Q	-0.906355	-0.930156	NS
FBgn0262146	MtnE	-1.13188	-0.828981	NS
FBgn0033139	Tsp42Er	-0.688221	-0.373664	NS
FBgn0031998	SLC5A11	-0.62722	-0.111877	NS
FBgn0032235	CG5096	-0.741413	0.632432	NS
FBgn0264979	CG4267	-0.413861	-0.480754	NS
FBgn0038147	CCHa2	-0.559321	-0.77503	NS
FBgn0052687	CG32687	-0.605329	-0.307677	NS
FBgn0050160	CG30160	-0.83466	-1.2966	NS
FBgn0036837	CG18135	-0.787808	-0.114509	NS
FBgn0031478	CG8814	-0.485544	-0.0456315	NS
FBgn0034392	MFS15	-0.406339	-0.0486075	NS
FBgn0053120	CG33120	-0.986327	-0.204786	NS
FBgn0037265	spartin	-0.294159	-0.174795	NS
FBgn0033221	CG12825	-0.994507	0.19214	NS
FBgn0065032	Arpc3B	-0.516027	-0.555534	NS
FBgn0036759	CG5577	-0.718982	-0.173437	NS
FBgn0287631	CG46491	-0.361554	-0.193642	NS
FBgn0030452	MFS10	-0.40176	-0.139763	NS
FBgn0032124	CG17855	-0.521879	-0.28205	NS
FBgn0002917	na	0.405394	-0.224278	NS
FBgn0033373	CG8080	-0.350943	0.254178	NS
FBgn0036205	CG14131	-0.401276	0.605278	NS
FBgn0025595	AkhR	-0.64065	0.288951	NS
FBgn0033051	Strica	-0.410571	-0.58372	NS
FBgn0037065	CG12974	-0.492674	-0.29697	NS
FBgn0035670	CG10472	-1.06995	0.940485	NS
FBgn0086608	CG34112	-0.526901	-0.139166	NS
FBgn0053494	CG33494	-0.853651	-0.419951	NS
FBgn0037518	CG2641	-0.425244	-0.30915	NS
FBgn0026315	Ugt35A1	-0.700616	-0.573733	NS
FBgn0017558	Pdk	-1.09259	-0.170397	NS
FBgn0030752	CDC50	-0.310056	-0.0748042	NS
FBgn0034951	CG3860	-0.361529	0.0375524	NS
FBgn0032075	Tsp29Fb	-0.55746	-0.26288	NS
FBgn0038391	GATAe	-0.554176	0.301428	NS
FBgn0039154	Npc2f	-0.760262	-0.00995032	NS
FBgn0028381	Decay	-0.535479	0.490237	NS
FBgn0028518	CG18480	-0.5569	-0.155604	NS
FBgn0021979	l(2)k09913	-0.287182	-0.038794	NS
FBgn0020391	Nrk	0.430052	0.161335	NS
FBgn0034758	CG13510	-0.52902	0.0746269	NS
FBgn0016715	Reg-2	-0.654171	-0.266028	NS
FBgn0031988	CG8668	-0.288016	0.234673	NS
FBgn0000464	Lar	0.230019	0.0098309	NS
FBgn0040319	Gclc	-0.818605	0.0518195	NS
FBgn0259224	CG42324	-0.690778	-0.595768	NS
FBgn0266720	Snap24	-0.176831	-0.140347	NS
FBgn0002121	l(2)gl	-0.35276	-0.0548525	NS
FBgn0038682	CG5835	-0.54496	0.661207	NS
FBgn0029835	CG5921	-0.4846	0.286453	NS
FBgn0046302	CG10650	-0.774051	-0.263754	NS
FBgn0002869	MtnB	-1.07023	-0.451065	NS
FBgn0286828	dind	-0.391314	-0.167614	NS
FBgn0036640	nxf2	0.886766	1.10359	NS
FBgn0001208	Hn	-0.799202	-0.305294	NS
FBgn0010425	epsilonTry	-1.05893	1.42299	NS
FBgn0031814	retm	-0.277148	-0.300601	NS
FBgn0035083	Tina-1	-0.477786	-0.191803	NS
FBgn0038388	CG4287	-0.260857	-0.0823581	NS
FBgn0031971	Sirup	-1.0354	0.426454	NS
FBgn0037750	Whamy	-0.612021	-0.516171	NS
FBgn0036727	SecCl	-0.459488	-0.292802	NS
FBgn0051198	CG31198	-0.827296	0.70869	NS
FBgn0050031	CG30031	-1.75203	1.26333	NS
FBgn0032074	Tsp29Fa	-0.675851	0.302278	NS
FBgn0030688	CG8952	-0.662405	1.17242	NS
FBgn0031973	Spn28Dc	-0.363835	-0.313874	NS
FBgn0033402	Myd88	-0.463169	-0.438859	NS
FBgn0033183	CG1620	0.216633	0.318144	NS
FBgn0027601	pdgy	-0.591201	0.0468381	NS
FBgn0260866	dnr1	-0.455311	-0.0812077	NS
FBgn0035877	CG7083	-0.385815	-0.241335	NS
FBgn0034031	CG12963	-0.405993	-0.126025	NS
FBgn0035806	PGRP-SD	-0.694726	-0.322011	NS
FBgn0044047	Ilp6	-0.620859	0.129465	NS
FBgn0010406	RNaseX25	-0.331261	-0.0736401	NS
FBgn0260746	Ect3	-0.526697	0.425068	NS
FBgn0038603	PKD	-0.234251	-0.616035	NS
FBgn0031285	CG3662	-0.302315	-0.17755	NS
FBgn0259749	mmy	-0.387612	0.166309	NS
FBgn0026593	CG5707	-0.798169	-0.300012	NS
FBgn0037741	Tti1	-0.337831	0.123184	NS
FBgn0035583	CG13704	-0.414273	-0.568821	NS
FBgn0014380	RhoL	-0.313323	0.243943	NS
FBgn0028950	CG15255	-1.38416	1.55347	NS
FBgn0019662	qm	-0.317888	-0.0644324	NS
FBgn0033777	CG17574	-0.423051	-0.322028	NS
FBgn0035101	p130CAS	-0.177783	0.135049	NS
FBgn0025352	Mtpbeta	-0.352788	-0.131572	NS
FBgn0040364	CG11378	-0.657497	-0.492269	NS
FBgn0034958	CG3907	-0.223014	0.0154194	NS
FBgn0030484	GstT4	-0.588338	-0.0564602	NS
FBgn0033659	Damm	-1.13537	-0.186816	NS
FBgn0033476	oys	-0.257288	-0.0463312	NS
FBgn0038197	foxo	-0.289105	0.0514212	NS
FBgn0036257	RhoGAP68F	-0.256415	-0.336111	NS
FBgn0032949	Lamp1	-0.321219	-0.164328	NS
FBgn0011274	Dif	-0.33272	-0.172825	NS
FBgn0267698	Pak	-0.215779	-0.164528	NS
FBgn0004228	mex1	-0.631747	0.441429	NS
FBgn0015575	alpha-Est7	-0.640651	-0.474287	NS
FBgn0015609	CadN	0.401246	0.435357	NS
FBgn0032613	Nepl9	-0.980806	-0.314403	NS
FBgn0286785	scb	-0.476101	0.298611	NS
FBgn0035665	Jon65Aiii	-0.946885	0.419237	NS
FBgn0020633	Mcm7	0.36525	0.920017	NS
FBgn0033926	Arc1	-0.886072	-0.433084	NS
FBgn0010583	dock	0.215406	0.0750744	NS
FBgn0030396	CG2556	-0.525374	0.741607	NS
FBgn0040305	MTF-1	-0.338439	-0.0869354	NS
FBgn0033483	egr	-0.363302	-0.0514883	NS
FBgn0030603	CG5541	-0.342171	-0.0850774	NS
FBgn0031092	Ech1	-0.282374	0.133986	NS
FBgn0033423	Alp6	-0.805619	0.655745	NS
FBgn0038465	Irc	-0.486387	-0.311244	NS
FBgn0004687	Mlc-c	-0.223918	-0.177196	NS
FBgn0017482	T3dh	-0.575604	-0.176127	NS
FBgn0083972	CG34136	-1.1064	-0.12829	NS
FBgn0261822	Bsg	-0.230192	-0.206956	NS
FBgn0260744	Tango9	-0.343611	-0.0744058	NS
FBgn0014427	CG11899	-0.842458	0.1288	NS
FBgn0042102	CG18745	-0.520146	0.025277	NS
FBgn0265512	mlt	-0.342624	0.094295	NS
FBgn0015221	Fer2LCH	-0.559679	-0.339414	NS
FBgn0261674	CG42709	-0.252139	-0.301087	NS
FBgn0032435	Oatp33Eb	-0.595198	-0.142255	NS
FBgn0052476	mthl14	-0.368276	-0.833025	NS
FBgn0015795	Rab7	-0.296608	-0.227547	NS
FBgn0261588	pdm3	0.59208	0.0288519	NS
FBgn0025624	CG4025	-0.303775	-0.120483	NS
FBgn0030040	CG15347	-0.751404	-0.233901	NS
FBgn0011205	fbl	-0.290551	0.133127	NS
FBgn0050503	CG30503	-0.782407	0.0520571	NS
FBgn0032373	Vha100-5	-0.586955	1.0976	NS
FBgn0037146	P5CS	-0.434039	0.0195193	NS
FBgn0035444	CG12012	-0.293339	-0.319994	NS
FBgn0030993	Mec2	-0.518124	-0.710092	NS
FBgn0034741	CG4269	-0.866245	-0.455303	NS
FBgn0034717	CG5819	-0.547183	-0.159138	NS
FBgn0030013	GIIIspla2	-0.711435	-0.075416	NS
FBgn0003701	thr	0.431261	0.917787	NS
FBgn0032715	CG17597	-0.623542	0.0234063	NS
FBgn0040336	Seipin	-0.920594	-0.233558	NS
FBgn0032665	CG15152	-0.469027	0.272756	NS
FBgn0036765	CG7408	-0.576437	0.0959793	NS
FBgn0259916	CG42445	-0.284285	-0.0827828	NS
FBgn0038595	CG7142	-0.611793	-0.0957633	NS
FBgn0030747	CG4301	-0.550965	0.248164	NS
FBgn0040299	Myo28B1	-0.610398	0.828362	NS
FBgn0029831	CG5966	-1.31634	0.216163	NS
FBgn0011604	Iswi	0.27529	0.116234	NS
FBgn0028400	Syt4	0.37786	0.0597272	NS
FBgn0035811	Mcad	-0.44235	0.0485943	NS
FBgn0028360	Cdc7	0.258071	0.362482	NS
FBgn0036831	CG6839	-1.11502	0.75931	NS
FBgn0030817	CG4991	-0.841271	0.490438	NS
FBgn0030575	CG5321	-0.925846	-0.322566	NS
FBgn0030685	Graf	-0.194536	-0.109588	NS
FBgn0035186	CG13912	-0.972889	-0.11466	NS
FBgn0034588	CG9394	-1.17315	1.1517	NS
FBgn0032787	CG10195	-0.359732	0.24616	NS
FBgn0052594	be	-0.264039	-0.0715226	NS
FBgn0031764	CG9107	0.355399	0.514696	NS
FBgn0261791	SNRPG	0.272748	0.426084	NS
FBgn0014010	Rab5	-0.226654	-0.16659	NS
FBgn0051648	CG31648	-0.405766	-0.221587	NS
FBgn0003651	svp	-0.316471	-0.136611	NS
FBgn0015777	nrv2	0.219258	0.0236445	NS
FBgn0036449	bmm	-0.504496	-0.0586075	NS
FBgn0033214	CG1941	0.525342	0.127662	NS
FBgn0053056	CG33056	-0.309298	-0.0659748	NS
FBgn0264449	CG43867	0.333169	0.474948	NS
FBgn0010473	tutl	0.320284	0.247447	NS
FBgn0011584	Trp1	-0.208838	-0.198885	NS
FBgn0036318	Wbp2	-0.221322	-0.268499	NS
FBgn0036309	Hip1	-0.336144	-0.0901038	NS
FBgn0031805	Nepl4	-0.648602	-0.101211	NS
FBgn0053105	p24-2	4.56601	2.80185	NS
FBgn0031741	CG11034	-0.855268	0.258381	NS
FBgn0046114	Gclm	-0.483823	-0.327767	NS
FBgn0260462	CtsF	-0.30884	-0.160501	NS
FBgn0035309	CG15879	-0.60875	-0.230559	NS
FBgn0037012	Rcd2	-0.370008	-0.0290857	NS
FBgn0033853	CG6145	-0.315114	-0.0939779	NS
FBgn0021872	Xbp1	-0.336413	-0.105067	NS
FBgn0039970	CG17508	-0.339695	-0.0381504	NS
FBgn0052137	CG32137	-0.236212	0.0196838	NS
FBgn0034354	GstE11	-0.898995	-0.871702	NS
FBgn0031213	galectin	-0.280712	-0.08444	NS
FBgn0020626	Osbp	-0.2268	-0.0659704	NS
FBgn0086687	Desat1	-0.556934	-0.121418	NS
FBgn0265102	Oseg1	0.407642	0.211087	NS
FBgn0032160	CG4598	-0.386362	0.0187454	NS
FBgn0011555	thetaTry	-0.99294	0.863654	NS
FBgn0035397	PAN3	-0.248978	0.105545	NS
FBgn0000557	eEF1alpha2	0.475083	0.257625	NS
FBgn0052485	CG32485	-0.413124	-0.0449014	NS
FBgn0035132	mthl10	-0.270495	-0.0078259	NS
FBgn0262872	milt	-0.328671	-0.217195	NS
FBgn0267339	p38c	-0.483675	-1.11218	NS
FBgn0036556	hzg	-0.335834	-0.197345	NS
FBgn0025373	Fpps	-0.27838	-0.082118	NS
FBgn0038679	CG6040	-0.301	0.0968092	NS
FBgn0015625	CycB3	0.498698	0.800037	NS
FBgn0003963	ush	-0.209823	-0.197637	NS
FBgn0040850	CG15210	-0.364147	-0.387288	NS
FBgn0040398	CG14629	-0.436666	-0.184682	NS
FBgn0287209	Gfat1	-0.271704	0.260651	NS
FBgn0038466	CG8907	-0.710116	-0.194438	NS
FBgn0017561	Ork1	-0.504545	-0.256294	NS
FBgn0036996	mag	-0.861279	0.921611	NS
FBgn0000063	Mps1	0.418085	0.627362	NS
FBgn0014127	barr	0.359052	0.396383	NS
FBgn0031069	Abcd3	-0.41914	-0.0648935	NS
FBgn0000633	tei	0.709854	0.694236	NS
FBgn0034628	Acox57D-p	-0.543686	-0.0710583	NS
FBgn0003545	sub	0.459053	2.12411	NS
FBgn0041156	exex	-0.610199	1.09957	NS
FBgn0040239	bc10	-0.203255	0.0140868	NS
FBgn0026378	Rep	-0.185706	-0.120934	NS
FBgn0040321	GNBP3	-0.27012	-0.187809	NS
FBgn0039310	CG11878	-1.68272	-1.14973	NS
FBgn0266668	Exo84	-0.27423	-0.19179	NS
FBgn0266084	Fhos	-0.33998	-0.204476	NS
FBgn0037028	CG3618	0.296616	0.364271	NS
FBgn0030276	Dlic	-0.211577	-0.220499	NS
FBgn0004509	Fur1	-0.191134	-0.196619	NS
FBgn0004584	Rrp1	0.272629	0.546489	NS
FBgn0023531	CG32809	0.297892	0.358555	NS
FBgn0033259	Tmem63	-0.350263	-0.233007	NS
FBgn0036058	CG6707	-0.20663	-0.148209	NS
FBgn0035438	PHGPx	-0.347798	-0.46233	NS
FBgn0015571	alpha-Est3	-0.394393	-0.268689	NS
FBgn0034172	CG6665	-0.259168	-0.137998	NS
FBgn0263050	CG43345	0.29752	0.583263	NS
FBgn0002638	Rcc1	0.196145	0.518808	NS
FBgn0034290	CG5773	-0.546048	0.425177	NS
FBgn0037070	CG11309	-0.442082	-0.156287	NS
FBgn0033272	RagC-D	-0.141197	-0.0412576	NS
FBgn0037000	ZnT77C	-0.304363	-0.254407	NS
FBgn0021765	scu	-0.385734	-0.115672	NS
FBgn0034978	CG3257	0.36797	0.203736	NS
FBgn0028468	rtet	-0.249538	0.0352782	NS
FBgn0013272	Gp150	-0.257698	-0.0110769	NS
FBgn0263234	Phae1	-0.677683	0.610537	NS
FBgn0031004	CG7992	-0.592516	0.09954	NS
FBgn0038135	CG8773	-0.948196	1.46184	NS
FBgn0030608	Lsd-2	-0.339189	-0.0388213	NS
FBgn0039958	CG12567	-0.244207	-0.105089	NS
FBgn0014184	Oda	-0.297571	0.043059	NS
FBgn0259244	CG42342	0.287175	0.440731	NS
FBgn0052062	Rbfox1	0.248294	0.100036	NS
FBgn0036945	Ssk	-0.45322	0.00721297	NS
FBgn0032130	brwl	-0.219848	0.229628	NS
FBgn0015286	Rala	-0.242255	-0.261275	NS
FBgn0035590	Tcs5	-0.262602	0.111162	NS
FBgn0052672	Atg8a	-0.247115	-0.142774	NS
FBgn0283472	S6k	-0.239186	-0.206637	NS
FBgn0052677	X11Lbeta	0.330454	0.220335	NS
FBgn0031813	Acox3	-0.702526	-0.0407264	NS
FBgn0028424	JhI-26	-0.579358	-0.275217	NS
FBgn0031514	OtopLb	-0.59324	0.408457	NS
FBgn0025692	Lfg	-0.602778	-0.653522	NS
FBgn0028480	CG17841	-0.371947	-0.348816	NS
FBgn0010660	Nup214	0.184829	0.0766145	NS
FBgn0054026	CG34026	-1.40727	0.761851	NS
FBgn0032900	CG14401	-0.393639	-0.0998992	NS
FBgn0034642	CG15674	-0.370477	0.351248	NS
FBgn0032295	CG12299	0.298644	0.716427	NS
FBgn0031968	CG7231	-0.670443	-0.689973	NS
FBgn0011327	Uch-L5	0.394447	0.213915	NS
FBgn0040918	schlank	-0.298866	0.0706787	NS
FBgn0036419	CG13482	-0.748743	0.859871	NS
FBgn0002524	lace	-0.382053	-0.03357	NS
FBgn0038819	Cpr92F	0.684526	1.54633	NS
FBgn0036483	CG12316	0.183591	0.315352	NS
FBgn0029935	CG4615	-0.346902	0.289867	NS
FBgn0033266	Socs44A	-0.217367	-0.389478	NS
FBgn0035498	Fit1	-0.203661	-0.162768	NS
FBgn0003885	alphaTub84D	0.206725	0.184612	NS
FBgn0039209	REPTOR	-0.265272	-0.120124	NS
FBgn0036337	Adk2	-0.29926	-0.174199	NS
FBgn0033448	hebe	-0.548052	-0.146627	NS
FBgn0050115	GEFmeso	-0.292032	-0.19007	NS
FBgn0035094	CG9380	-0.584371	-0.302643	NS
FBgn0030929	CG15043	-1.11306	0.891448	NS
FBgn0039747	AdoR	-0.27837	0.11411	NS
FBgn0025739	pon	0.421719	1.26648	NS
FBgn0001206	Hmr	0.237261	0.0187424	NS
FBgn0265416	Neto	-0.479198	-0.300348	NS
FBgn0266916	Cenp-C	0.342882	0.773425	NS
FBgn0030731	Mfe2	-0.61662	0.214537	NS
FBgn0031473	CG3104	0.408686	0.195048	NS
FBgn0051086	CG31086	-0.661006	0.73011	NS
FBgn0025683	CG3164	-0.310562	-0.266188	NS
FBgn0036480	Cep135	0.329253	0.317192	NS
FBgn0030864	CG8173	0.390105	0.654648	NS
FBgn0085205	CG34176	-0.487862	0.528539	NS
FBgn0039360	CLS	-0.315458	0.126508	NS
FBgn0037020	Pex14	-0.304161	0.0182558	NS
FBgn0015808	ScpX	-0.296308	-0.0448683	NS
FBgn0025625	Sik2	0.367124	-0.398989	NS
FBgn0033760	CG8785	-0.698692	0.586037	NS
FBgn0035246	CG13928	0.363837	0.156103	NS
FBgn0027498	CG2061	0.229456	0.0661878	NS
FBgn0260463	Unc-115b	5.18473	3.19863	NS
FBgn0042104	CG18747	-0.452135	-0.305503	NS
FBgn0053178	CG33178	-0.62264	-0.014364	NS
FBgn0036623	Agpat3	-0.274427	0.024127	NS
FBgn0036732	Oatp74D	-0.263684	-0.249803	NS
FBgn0086356	tum	0.337515	0.926665	NS
FBgn0050183	CG30183	0.279743	0.0380304	NS
FBgn0029526	CR18166	0.413619	0.224067	NS
FBgn0266111	ana3	0.372913	0.368753	NS
FBgn0011656	Mef2	-0.241353	0.0688539	NS
FBgn0038303	SIDL	-0.190206	0.033669	NS
FBgn0036422	CG3868	-0.668906	1.41724	NS
FBgn0260399	gwl	0.481088	2.19294	NS
FBgn0027572	ACOX1	-0.385704	-0.460509	NS
FBgn0026570	CG5704	-0.640415	-0.150506	NS
FBgn0031070	CG12702	0.407298	1.1035	NS
FBgn0043471	kappaTry	-0.616212	1.45282	NS
FBgn0027106	Inx7	-0.593514	-0.193579	NS
FBgn0051004	mesh	-0.53042	-0.000368874	NS
FBgn0029685	CG2938	-0.310815	-0.0886703	NS
FBgn0036341	Syx13	-0.271511	-0.495567	NS
FBgn0034638	CG10433	-0.5982	-0.0571944	NS
FBgn0034436	CG11961	-0.495792	0.185836	NS
FBgn0032782	Rab9	-0.389297	0.0276708	NS
FBgn0031313	CG5080	-0.360994	-0.421239	NS
FBgn0039266	CG11791	-0.196666	-0.160793	NS
FBgn0086384	Mer	-0.190276	0.00772694	NS
FBgn0034400	CG15099	-0.278009	-0.0780451	NS
FBgn0010341	Cdc42	-0.178474	-0.11458	NS
FBgn0031969	pes	-0.434403	0.105659	NS
FBgn0028955	CG8788	-0.545377	-0.0582045	NS
FBgn0030300	Sk1	-0.529446	0.106717	NS
FBgn0003310	S	0.193823	0.338173	NS
FBgn0039449	CG6425	0.624072	1.00398	NS
FBgn0023525	CG3191	-0.354648	-0.0251666	NS
FBgn0015000	betaggt-I	-0.233062	-0.156017	NS
FBgn0035515	CG14997	-0.314595	-0.0335034	NS
FBgn0085261	CG34232	-0.542595	0.232001	NS
FBgn0019932	SamDC	-0.270126	-0.130351	NS
FBgn0010395	Itgbn	-0.552664	-0.323355	NS
FBgn0030890	CG7536	-0.260992	0.0399771	NS
FBgn0030347	CG15739	-0.829611	-0.983183	NS
FBgn0037473	CG10068	-0.252733	-0.238523	NS
FBgn0051087	CG31087	-0.679185	0.0824666	NS
FBgn0034761	CG4250	-0.864851	-0.10738	NS
FBgn0261553	CG42671	-0.202599	-0.0994076	NS
FBgn0261461	RhoGAP18B	-0.175516	0.0057914	NS
FBgn0038156	side-IV	0.243212	-0.0668214	NS
FBgn0032358	Ppt2	-0.311025	-0.221763	NS
FBgn0086698	frtz	-0.406704	-0.0326419	NS
FBgn0036801	MYPT-75D	-0.303355	0.0511598	NS
FBgn0029093	cathD	-0.335498	-0.255238	NS
FBgn0030519	CG11151	-0.337408	0.0384971	NS
FBgn0027070	Ugt36E1	-0.829881	-0.224817	NS
FBgn0002948	nod	0.28033	0.23071	NS
FBgn0037560	CR18228	-0.463874	-0.147231	NS
FBgn0024227	aurB	0.384097	-0.0238365	NS
FBgn0010357	betaTry	-1.61829	1.06295	NS
FBgn0035779	CG8562	-0.852824	1.22016	NS
FBgn0040285	Scamp	-0.247316	-0.266937	NS
FBgn0037817	Cyp12e1	-0.435389	-0.12847	NS
FBgn0004379	Klp67A	0.423367	0.889736	NS
FBgn0032167	CG5853	-0.447512	-1.00002	NS
FBgn0038460	CG18622	-0.436687	-0.694766	NS
FBgn0030629	CG9123	0.475058	0.605022	NS
FBgn0011695	EbpIII	-0.778815	-0.0903	NS
FBgn0004914	Hnf4	-0.229806	-0.0508735	NS
FBgn0040077	primo-1	-0.277366	0.0649431	NS
FBgn0035619	Alp10	-1.09558	1.79211	NS
FBgn0035043	CG4781	-0.511006	0.511731	NS
FBgn0027579	mino	-0.277742	-0.0686925	NS
FBgn0262647	Nup160	0.169316	0.181679	NS
FBgn0034432	CG7461	-0.42557	-0.255735	NS
FBgn0028479	Mtpalpha	-0.361231	-0.137901	NS
FBgn0262636	dati	0.573222	0.529499	NS
FBgn0025381	rush	-0.152058	-0.130926	NS
FBgn0051523	CG31523	-0.209974	0.0278272	NS
FBgn0033783	CG17019	-0.204991	-0.146402	NS
FBgn0002552	lin	0.215125	0.201027	NS
FBgn0038424	CG17565	-0.153528	-0.104951	NS
FBgn0004888	Scsalpha1	-0.310751	0.196583	NS
FBgn0039519	Cyp6a18	0.713845	-1.1606	NS
FBgn0033494	KCNQ	-0.331915	-0.000468251	NS
FBgn0264693	ens	-0.179519	-0.0526335	NS
FBgn0051262	CG31262	-0.974914	0.918339	NS
FBgn0027111	miple1	0.329298	0.102691	NS
FBgn0034128	CG4409	0.413058	1.28476	NS
FBgn0002715	mei-S332	0.513747	1.12115	NS
FBgn0031518	CG3277	-0.461371	0.527637	NS
FBgn0261041	stj	0.333377	0.827652	NS
FBgn0031662	CG3792	-0.295232	-0.130303	NS
FBgn0041186	Slbp	0.258931	0.264859	NS
FBgn0003459	stwl	0.262492	0.162644	NS
FBgn0030882	Gss1	-0.368343	-0.0669144	NS
FBgn0015570	alpha-Est2	-0.756016	-0.107486	NS
FBgn0264089	sli	0.290624	0.0190922	NS
FBgn0038722	Nup58	0.301699	0.333565	NS
FBgn0033812	Pex13	-0.217415	0.0540002	NS
FBgn0016701	Rab4	-0.164355	0.0233648	NS
FBgn0033540	Elp2	-0.481317	-0.543233	NS
FBgn0086784	stmA	-0.180871	-0.175056	NS
FBgn0038984	AdipoR	-0.243761	-0.125436	NS
FBgn0000287	salr	0.391822	0.309755	NS
FBgn0000535	eag	-0.935489	-0.0551844	NS
FBgn0033945	CG12868	-0.526551	-0.443736	NS
FBgn0028399	Serinc	-0.214101	-0.14898	NS
FBgn0266719	stac	-0.197822	-0.288666	NS
FBgn0003346	RanGAP	0.141945	0.252579	NS
FBgn0029996	UbcE2H	-0.302332	-0.15831	NS
FBgn0267384	Ubc7	-0.192011	-0.0216585	NS
FBgn0034720	Liprin-gamma	0.296673	0.0697966	NS
FBgn0066292	CheB42c	-0.59751	-0.149349	NS
FBgn0031602	CG15431	0.363905	0.232989	NS
FBgn0026428	HDAC6	-0.262011	-0.041638	NS
FBgn0002525	Lam	0.334873	0.19406	NS
FBgn0010113	hdc	0.279404	0.364259	NS
FBgn0038981	CG5346	-0.300378	-0.174003	NS
FBgn0034013	unc-5	0.355	0.117352	NS
FBgn0265298	SC35	0.169996	0.0239294	NS
FBgn0011701	repo	0.314759	-0.0227086	NS
FBgn0264785	Hph	-0.308339	-0.284755	NS
FBgn0026076	UBL3	-0.158844	-0.0953945	NS
FBgn0039790	CG2246	-0.18007	-0.106694	NS
FBgn0028554	x16	0.302845	0.277891	NS
FBgn0034058	Pex11ab	-0.354051	-0.065691	NS
FBgn0004435	Galphaq	-0.332176	-0.142883	NS
FBgn0014031	Agxt	-0.540893	-0.161391	NS
FBgn0031886	Nuf2	0.359391	0.745299	NS
FBgn0037298	Sccpdh1	-0.28938	-0.242734	NS
FBgn0052068	Adi1	-0.330895	-0.13275	NS
FBgn0033437	CG12926	-0.320597	-0.0888848	NS
FBgn0032400	CG6770	-0.41899	-0.0326874	NS
FBgn0002566	lt	-0.197124	-0.0493817	NS
FBgn0035872	Cpsf6	0.22393	0.109307	NS
FBgn0034971	Gpat4	-0.281234	-0.0175769	NS
FBgn0023097	bon	0.27273	0.190707	NS
FBgn0001986	Mtr4	0.201325	0.146459	NS
FBgn0036192	Pldn	-0.274691	-0.0860648	NS
FBgn0038291	CG3984	-0.937023	-0.231238	NS
FBgn0261808	cu	-0.211388	0.0666226	NS
FBgn0052170	CG32170	-0.398182	-0.177801	NS
FBgn0001941	ifc	-0.334737	0.0322211	NS
FBgn0027556	CG4928	-0.382513	0.0913108	NS
FBgn0259101	CG42249	-0.499988	0.679775	NS
FBgn0015772	Nak	-0.171881	0.0373092	NS
FBgn0014020	Rho1	-0.173188	-0.185079	NS
FBgn0015765	p38a	-0.223891	-0.0772728	NS
FBgn0035210	msd5	0.45942	0.759668	NS
FBgn0265185	CG44250	-0.535913	0.548759	NS
FBgn0000404	CycA	0.416868	1.52812	NS
FBgn0034943	Fmo-1	-0.50659	0.176651	NS
FBgn0033268	Obp44a	0.328284	0.711073	NS
FBgn0010314	Cks30A	0.344279	1.94405	NS
FBgn0051233	CG31233	-0.750147	1.26393	NS
FBgn0033544	CG7220	-0.270923	-0.319688	NS
FBgn0034249	RhoGAP54D	0.301138	1.00266	NS
FBgn0085400	side-V	0.380468	0.548997	NS
FBgn0036522	Phs	0.234454	0.191615	NS
FBgn0031987	CG12375	-0.253592	0.0903738	NS
FBgn0030060	CG2004	0.436943	-0.0995924	NS
FBgn0001961	Arpc1	-0.211121	-0.178654	NS
FBgn0030757	CG9902	0.310213	0.509032	NS
FBgn0031052	Elys	0.239828	0.0851165	NS
FBgn0085409	smal	0.411983	-0.202735	NS
FBgn0265598	Bx	0.251199	0.14035	NS
FBgn0030775	CG9673	-0.487836	1.11526	NS
FBgn0039751	CG1983	-0.17953	-0.222762	NS
FBgn0025637	SkpA	-0.221667	0.0684956	NS
FBgn0052695	CG32695	-0.396089	-0.0643363	NS
FBgn0032779	Alp12	-0.500305	-0.114692	NS
FBgn0033185	CG1603	0.237678	0.0271965	NS
FBgn0031598	Vps53	-0.162173	-0.339905	NS
FBgn0003557	Su(dx)	-0.247021	-0.389559	NS
FBgn0011259	Sema1a	0.352348	0.959192	NS
FBgn0051431	CG31431	-0.366304	-0.215229	NS
FBgn0034664	CG4377	-0.850345	0.474817	NS
FBgn0039559	NSD	0.174684	0.150442	NS
FBgn0040060	yip7	-0.668592	1.29353	NS
FBgn0038115	CG7966	-0.58035	0.0426316	NS
FBgn0000140	asp	0.348193	1.52643	NS
FBgn0037248	srl	0.197388	0.138102	NS
FBgn0000451	ect	-0.416775	0.307716	NS
FBgn0017577	Mcm5	0.296101	1.39747	NS
FBgn0264574	Glut1	0.229012	-0.0288654	NS
FBgn0051869	CG31869	0.297907	0.150314	NS
FBgn0032704	Jwa	-0.177841	-0.0511344	NS
FBgn0000352	cos	0.183556	0.0992634	NS
FBgn0052267	CG32267	-0.228529	-0.0160946	NS
FBgn0038877	CG3308	-0.230651	-0.0398314	NS
FBgn0032454	CG5787	0.185984	0.120824	NS
FBgn0027500	spd-2	0.337931	0.934161	NS
FBgn0023515	Gcna	0.270009	1.04062	NS
FBgn0263855	BubR1	0.302616	0.797025	NS
FBgn0034490	CG9864	-0.379395	0.223675	NS
FBgn0266801	CG45263	0.262464	0.512634	NS
FBgn0015010	Ag5r	-0.828259	0.375215	NS
FBgn0031942	CG7203	-1.09635	0.864648	NS
FBgn0031970	CG7227	-0.922744	0.440944	NS
FBgn0035644	PolE2	0.346574	1.724	NS
FBgn0032187	CG4839	-0.334819	-0.138401	NS
FBgn0038202	CG12402	0.355815	0.0144431	NS
FBgn0028542	NimB4	-0.36421	-0.317907	NS
FBgn0033320	CG8586	-0.527136	-0.213446	NS
FBgn0250867	CG42238	0.295952	0.0510398	NS
FBgn0020304	drongo	-0.228529	-0.0564547	NS
FBgn0030234	CG15211	-0.481565	0.0714557	NS
FBgn0031401	papi	-0.314254	-0.142715	NS
FBgn0040732	CG16926	-0.448896	-0.323651	NS
FBgn0001085	fz	0.324383	0.688951	NS
FBgn0050467	CG30467	0.26794	0.210493	NS
FBgn0027503	CG11970	0.13313	0.026025	NS
FBgn0036319	Ent3	0.364926	-0.100291	NS
FBgn0033196	CG1358	-0.3211	0.578434	NS
FBgn0085391	trv	0.347694	0.234356	NS
FBgn0032652	CG6870	-0.803564	0.711122	NS
FBgn0031428	CG9886	-0.443796	-0.170945	NS
FBgn0037746	CG8478	0.479859	0.52422	NS
FBgn0034538	CG16799	-0.464634	-0.0771146	NS
FBgn0030872	Ucp4A	-0.207779	0.110685	NS
FBgn0027949	msb1l	0.427939	2.06789	NS
FBgn0264442	ab	0.204828	0.107469	NS
FBgn0051104	CG31104	-0.865129	0.548433	NS
FBgn0036302	sowah	-0.227397	-0.109108	NS
FBgn0032911	tadr	0.419689	-0.121473	NS
FBgn0031579	CG15422	-0.66252	1.21731	NS
FBgn0037801	CG3999	-0.599625	-0.122632	NS
FBgn0038721	subdued	-0.243948	-0.652813	NS
FBgn0263593	Lpin	-0.207874	-0.243487	NS
FBgn0038366	CG4576	-0.469195	0.423683	NS
FBgn0014930	CG2846	-0.309611	-0.157799	NS
FBgn0035409	CG14963	-0.697482	-0.465046	NS
FBgn0002924	ncd	0.348849	0.672786	NS
FBgn0028663	VhaM9.7-b	-0.267866	0.00331744	NS
FBgn0004378	Klp61F	0.305897	1.10752	NS
FBgn0030241	feo	0.326797	1.42315	NS
FBgn0039135	CG13603	-0.22402	-0.00919845	NS
FBgn0031282	Pex12	-0.256346	0.158722	NS
FBgn0037025	Spc105R	0.356663	1.04221	NS
FBgn0033821	CG10799	-1.27774	0.318731	NS
FBgn0023511	Edem1	-0.173364	-0.0837832	NS
FBgn0259176	bun	-0.167284	0.052247	NS
FBgn0032940	Mondo	-0.225042	0.125265	NS
FBgn0036196	CG11658	-0.427895	-0.370267	NS
FBgn0015034	Cyp4e1	-0.650128	0.498024	NS
FBgn0259682	Jabba	-0.588362	-0.302887	NS
FBgn0034808	CG9896	-0.40896	0.160812	NS
FBgn0037340	CG14671	-0.245471	-0.184946	NS
FBgn0034498	CG16868	0.200272	0.298319	NS
FBgn0024196	robl	-0.210075	-0.0723831	NS
FBgn0066101	LpR1	-0.446867	0.124179	NS
FBgn0040232	cmet	0.372651	1.52655	NS
FBgn0039966	Rab21	-0.204822	0.00560808	NS
FBgn0029504	CHES-1-like	-0.356413	-0.0265666	NS
FBgn0033744	Dh44-R2	-0.315712	-0.515186	NS
FBgn0031762	CG9098	0.242707	0.85899	NS
FBgn0032018	CG7806	-0.278489	-0.171624	NS
FBgn0035976	PGRP-LC	-0.282232	0.293189	NS
FBgn0039125	Ndc1	0.179258	0.0352779	NS
FBgn0263934	esn	0.502044	0.39401	NS
FBgn0028952	Kebab	0.492047	0.986427	NS
FBgn0038476	kuk	0.455427	0.651815	NS
FBgn0035033	CG3548	0.279524	0.149999	NS
FBgn0032006	Pvr	-0.216561	-0.140647	NS
FBgn0037019	Pex16	-0.275235	0.0650627	NS
FBgn0259246	brp	0.292489	0.0545153	NS
FBgn0032910	CG9265	-0.377022	0.161002	NS
FBgn0038552	Alg1	-0.212819	0.0853008	NS
FBgn0264556	Gr39a	-0.86911	-0.112234	NS
FBgn0050035	Tret1-1	-0.334127	-0.208332	NS
FBgn0032244	RfC3	0.267881	0.651921	NS
FBgn0014906	Hydr2	-0.32796	-0.550991	NS
FBgn0033451	Marc	-0.228296	0.122853	NS
FBgn0062413	Ctr1A	-0.223356	-0.128356	NS
FBgn0053346	CG33346	-1.82102	-0.785589	NS
FBgn0086347	Myo31DF	-0.313781	0.19375	NS
FBgn0286516	aqz	-0.186538	0.0971223	NS
FBgn0003268	rod	0.293009	0.321856	NS
FBgn0283521	lola	0.185153	0.103051	NS
FBgn0033757	muskelin	-0.175795	0.235074	NS
FBgn0000996	dup	0.197025	0.489605	NS
FBgn0036714	CG7692	0.368748	0.0570957	NS
FBgn0287825	Vha44	-0.299169	0.0184589	NS
FBgn0026371	SAK	0.293062	0.13493	NS
FBgn0037843	CG4511	0.192658	-0.0168513	NS
FBgn0041723	rho-5	0.282124	0.0388115	NS
FBgn0022097	Vha36-1	-0.318521	0.0022795	NS
FBgn0014396	tim	-0.65575	-0.0498297	NS
FBgn0038038	Sccpdh2	-0.371141	-0.104374	NS
FBgn0031170	Abca3	-0.492294	0.207673	NS
FBgn0261649	tinc	0.376911	0.58752	NS
FBgn0063493	GstE7	-0.666523	-0.38031	NS
FBgn0015277	Pi3K59F	-0.222534	-0.0775725	NS
FBgn0035431	CG14968	-0.372237	-0.385577	NS
FBgn0284252	Letm1	-0.214061	-0.024517	NS
FBgn0032144	CG17633	-0.744206	1.10982	NS
FBgn0034094	Tsf3	-0.355534	-4.5808e-05	NS
FBgn0011837	Tis11	-0.233144	-0.0338621	NS
FBgn0035360	CG1246	-0.519231	0.504284	NS
FBgn0003044	Pcl	0.205923	0.381874	NS
FBgn0039714	Zip99C	-0.385591	-0.337985	NS
FBgn0039731	Sas-6	0.325026	0.201304	NS
FBgn0037082	CG5664	0.241367	-0.0694523	NS
FBgn0030237	CG15209	-0.337883	-0.199973	NS
FBgn0036509	CG7739	-0.21449	-0.16445	NS
FBgn0051989	Cap-D3	-0.202218	-0.247766	NS
FBgn0037153	olf413	0.3026	0.0205123	NS
FBgn0042086	Tsp42Eb	-1.0341	0.316687	NS
FBgn0261361	CG42638	-0.324569	-0.093874	NS
FBgn0028490	CG31705	-0.217337	-0.315997	NS
FBgn0032451	spict	-0.221009	-0.273799	NS
FBgn0036294	CG10654	0.367892	0.41093	NS
FBgn0033427	Smyd4-1	0.169939	0.242771	NS
FBgn0037164	CG11438	-0.539361	-0.0328898	NS
FBgn0005631	robo1	0.212524	0.0860767	NS
FBgn0085453	Mthfs	-0.372145	-0.13292	NS
FBgn0032688	CG15160	0.183581	0.12238	NS
FBgn0051313	CG31313	-0.638658	-0.780221	NS
FBgn0261385	scra	0.417301	0.712421	NS
FBgn0031267	Ipk2	-0.231021	0.173078	NS
FBgn0265778	PDZ-GEF	0.259236	0.120319	NS
FBgn0028530	mTTF	-0.165837	-0.0209521	NS
FBgn0000077	amx	-0.230982	0.0681498	NS
FBgn0029507	Tsp42Ed	-0.45382	-0.306804	NS
FBgn0036828	Prp6	0.14675	0.15124	NS
FBgn0037684	Srr	-0.65604	-0.0122135	NS
FBgn0285879	disco-r	0.278763	0.0938138	NS
FBgn0000355	Cp15	-1.45644	-3.66167	NS
FBgn0266758	Esyt2	-0.310648	-0.27222	NS
FBgn0037445	CG9727	-0.342322	0.14702	NS
FBgn0031638	CG11927	0.27058	0.0238684	NS
FBgn0265630	sno	0.192435	-0.0307761	NS
FBgn0085405	CG34376	-0.179341	0.116884	NS
FBgn0005278	Sam-S	-0.336058	-0.00184968	NS
FBgn0038353	CG5399	-0.678633	-1.05395	NS
FBgn0011742	Arp2	-0.156981	-0.0729509	NS
FBgn0266282	jnj	0.286841	0.0629833	NS
FBgn0038973	Pebp1	-0.694884	1.16953	NS
FBgn0263602	Tasp1	0.228273	0.250935	NS
FBgn0031836	CG11050	-0.345064	-0.246935	NS
FBgn0033128	Tsp42Eg	-0.415212	-0.00732007	NS
FBgn0037659	Kdm2	0.288554	0.152692	NS
FBgn0038478	cal1	0.233254	0.340617	NS
FBgn0030051	spirit	-0.475533	-1.03407	NS
FBgn0035977	PGRP-LF	-0.467243	-0.228816	NS
FBgn0035065	CG3589	-0.292369	-0.229035	NS
FBgn0013469	klu	0.306357	0.262376	NS
FBgn0010278	Ssrp	0.190966	0.329921	NS
FBgn0038815	CG5466	0.478755	0.743333	NS
FBgn0037846	CG6574	-0.612675	0.18143	NS
FBgn0030670	Pis	-0.227133	-0.0987402	NS
FBgn0031252	CG13690	0.388392	1.30804	NS
FBgn0025815	Mcm6	0.212932	0.5758	NS
FBgn0002542	lds	0.302766	0.473557	NS
FBgn0032689	CG10413	-0.289914	0.037923	NS
FBgn0035091	CG3829	-0.549569	0.00543557	NS
FBgn0083984	CG34148	-0.306298	0.114153	NS
FBgn0013576	mtd	-0.199932	-0.0248665	NS
FBgn0039665	CG2310	0.394301	0.0703442	NS
FBgn0030799	CG4872	-0.409092	-0.0108782	NS
FBgn0004595	pros	0.575924	0.0648367	NS
FBgn0010223	Galphaf	-0.381049	-0.435872	NS
FBgn0004404	RpS14b	-0.210292	0.0669368	NS
FBgn0035833	CG7565	-0.246091	0.342171	NS
FBgn0265276	l(3)neo38	0.440334	-0.0630233	NS
FBgn0035632	Ppat-Dpck	-0.268604	0.0698841	NS
FBgn0033859	fand	1.18944	0.238733	NS
FBgn0035761	RhoGEF4	0.290576	1.38172	NS
FBgn0035640	mad2	0.361425	0.708741	NS
FBgn0023023	CRMP	0.159483	0.000670887	NS
FBgn0029113	Uba2	0.182701	0.174185	NS
FBgn0027889	ball	0.225183	0.412912	NS
FBgn0261436	DhpD	-0.227449	-0.199317	NS
FBgn0003090	pk	0.329176	0.212115	NS
FBgn0036697	rogdi	-0.238251	-0.198362	NS
FBgn0004880	scrt	0.307821	-0.223788	NS
FBgn0011740	alpha-Man-IIa	0.180529	-0.00345262	NS
FBgn0286198	LKRSDH	-0.292416	-0.545001	NS
FBgn0031734	CG11147	-0.373096	-0.381637	NS
FBgn0003612	Su(var)2-10	0.174429	0.196939	NS
FBgn0021800	Reph	0.26583	0.0227076	NS
FBgn0250848	26-29-p	-0.22627	0.103496	NS
FBgn0031937	CG13795	-0.373591	-0.0379099	NS
FBgn0038564	CG7785	-0.217061	-0.00336914	NS
FBgn0051108	TTLL5	0.242821	0.0805247	NS
FBgn0033983	Agps	0.327883	0.504833	NS
FBgn0040323	GNBP1	-0.198403	-0.329342	NS
FBgn0051973	Cda5	-0.310085	0.414983	NS
FBgn0020545	kraken	-0.349937	-0.233647	NS
FBgn0034500	CG11200	-0.372234	-0.217715	NS
FBgn0033113	Spn42Dc	-0.190708	-0.199051	NS
FBgn0039890	Abcd1	-0.313957	-0.0169567	NS
FBgn0026088	CG14818	-0.207446	0.0115712	NS
FBgn0031374	Wdr62	-0.306725	0.0634946	NS
FBgn0039132	AP-1sigma	-0.168131	-0.113225	NS
FBgn0086346	ALiX	-0.213067	-0.0964669	NS
FBgn0266598	Kmn2	0.3873	0.504493	NS
FBgn0028996	onecut	0.343193	0.210377	NS
FBgn0050020	CG30020	0.195758	0.085373	NS
FBgn0259734	Nost	-0.327954	0.0594721	NS
FBgn0063492	GstE8	-0.732729	-0.20043	NS
FBgn0024846	p38b	-0.224573	0.0344882	NS
FBgn0261565	Lmpt	-0.207967	0.0200299	NS
FBgn0003863	alphaTry	-0.792924	1.61986	NS
FBgn0053127	CG33127	-0.515297	0.637135	NS
FBgn0033015	d4	0.19065	0.140267	NS
FBgn0028509	CenG1A	-0.20151	0.120922	NS
FBgn0035617	l(3)psg2	0.172978	-0.0118984	NS
FBgn0283681	Tcs3	-0.19979	-0.0343927	NS
FBgn0013770	Cp1	-0.339287	-0.0611368	NS
FBgn0037810	sle	0.288128	0.331434	NS
FBgn0005386	ash1	0.206577	-0.023645	NS
FBgn0265988	mv	-0.298608	-0.113558	NS
FBgn0261648	salm	0.286323	-0.0152876	NS
FBgn0032477	Alg7	-0.311012	-0.171259	NS
FBgn0010039	GstD3	-0.377465	-0.0637811	NS
FBgn0040064	yip2	-0.377043	0.0574615	NS
FBgn0000533	ea	-0.244725	0.263842	NS
FBgn0058006	CG40006	-0.362015	-0.164112	NS
FBgn0024273	WASp	-0.217653	0.061003	NS
FBgn0037149	CG14561	0.369035	0.262618	NS
FBgn0035415	CG14966	-0.224592	0.0484907	NS
FBgn0027508	Tnks	-0.16062	-0.217782	NS
FBgn0032770	CG13086	-0.369162	-0.144622	NS
FBgn0050011	gem	-0.164346	-0.116875	NS
FBgn0036428	Gbs-70E	-0.282248	0.0819819	NS
FBgn0034406	Jheh3	-0.381647	0.245275	NS
FBgn0010198	RpS15Aa	-0.233444	-0.12209	NS
FBgn0036126	Irbp18	-0.20087	-0.230761	NS
FBgn0004050	z	0.220016	0.0821155	NS
FBgn0032348	CG4751	0.196035	0.0522751	NS
FBgn0031244	CG11601	-0.233021	-0.0136288	NS
FBgn0038610	CG7675	-0.322818	-0.141164	NS
FBgn0003660	Syb	-0.175005	-0.195215	NS
FBgn0259785	pzg	0.189788	0.053939	NS
FBgn0041180	Tep4	-0.268525	-0.264892	NS
FBgn0259791	bora	0.496786	1.74678	NS
FBgn0034894	sigmar	-0.464315	0.00564087	NS
FBgn0053113	Rtnl1	-0.219454	-0.380657	NS
FBgn0086855	CG17078	0.231716	0.102928	NS
FBgn0030093	Bap111	0.23224	0.171023	NS
FBgn0036805	Chmp1	-0.168753	-0.0741726	NS
FBgn0263120	Acsl	-0.359481	-0.382231	NS
FBgn0038652	CG7720	-0.443884	-0.356319	NS
FBgn0035495	CG14989	-0.372659	0.0119805	NS
FBgn0031563	CG10031	-0.721072	-0.338296	NS
FBgn0013987	MAPk-Ak2	-0.149801	-0.142804	NS
FBgn0035285	CG12025	-0.168225	-0.242473	NS
FBgn0285917	sbb	0.224154	0.157276	NS
FBgn0036821	CG3961	-0.591552	-0.190156	NS
FBgn0042175	CG18858	-0.291056	-0.137211	NS
FBgn0038897	CG5849	-0.532702	-0.0716318	NS
FBgn0001086	fzy	0.392129	0.742806	NS
FBgn0030499	CG11178	-0.215237	-0.12108	NS
FBgn0037648	CG11975	-0.181605	-0.141496	NS
FBgn0262619	DNAlig1	0.19341	0.643134	NS
FBgn0250754	CG42232	0.235848	0.138222	NS
FBgn0052549	CG32549	-0.215148	0.00867463	NS
FBgn0003137	Ppn	-0.28805	-0.246122	NS
FBgn0026597	Axn	0.212747	0.151264	NS
FBgn0053180	Ranbp16	0.142648	0.0126214	NS
FBgn0037074	Tbc1d8-9	-0.198182	-0.0151284	NS
FBgn0037792	TAF1B	0.18711	0.443346	NS
FBgn0003124	polo	0.428624	0.911277	NS
FBgn0034786	CG13531	-0.320337	-0.298807	NS
FBgn0034070	SP2353	0.287618	0.224065	NS
FBgn0034476	Toll-7	0.372878	-0.0845549	NS
FBgn0029828	CG6067	-0.3701	-0.0654439	NS
FBgn0002878	mus101	0.244747	0.154824	NS
FBgn0036921	RhoGDI	-0.153805	-0.0563743	NS
FBgn0040532	CG8369	-0.297537	-0.243958	NS
FBgn0037142	CG14562	0.188197	-0.0449893	NS
FBgn0267849	Syx7	-0.199005	-0.164038	NS
FBgn0011659	Mlh1	0.21671	0.405161	NS
FBgn0261278	grp	0.349645	0.406068	NS
FBgn0263112	Mitf	-0.173113	0.079663	NS
FBgn0035612	frm	-0.333906	0.164539	NS
FBgn0260386	mtg	-0.63951	0.136611	NS
FBgn0000562	egl	-0.202644	-0.0182282	NS
FBgn0000038	nAChRbeta1	0.312171	-0.448278	NS
FBgn0017590	klg	0.268491	-0.0767472	NS
FBgn0026432	Grip163	0.211042	0.0236945	NS
FBgn0036958	CG17233	0.159121	0.107032	NS
FBgn0034194	CG15611	-0.209171	-0.137046	NS
FBgn0002069	AspRS	-0.247694	-0.227965	NS
FBgn0039663	CG2321	0.329639	0.573909	NS
FBgn0033928	Arc2	-0.425224	-0.0561143	NS
FBgn0051729	CG31729	-0.157118	-0.0675645	NS
FBgn0005642	wdn	0.153416	0.0754964	NS
FBgn0028988	Spn42Dd	-0.305859	-0.263624	NS
FBgn0029079	icln	0.290254	0.248001	NS
FBgn0013732	sced	0.283643	0.576178	NS
FBgn0034491	Hsl	-0.127824	-0.00775115	NS
FBgn0026415	Idgf4	-0.255468	-0.45251	NS
FBgn0033463	CG1513	-0.145109	0.0119917	NS
FBgn0085359	CG34330	-0.660298	0.637347	NS
FBgn0034126	jtb	0.67618	0.701008	NS
FBgn0037913	fabp	-0.333712	0.059694	NS
FBgn0263603	Zn72D	0.101124	0.0217304	NS
FBgn0052133	Ptip	0.150931	0.00698211	NS
FBgn0039471	CG6295	-1.83031	1.36415	NS
FBgn0035318	CG9018	0.139464	0.131211	NS
FBgn0036493	CG7255	-0.263915	-0.0898425	NS
FBgn0262730	dtn	0.170489	0.312171	NS
FBgn0036008	CG3408	0.223565	0.0132255	NS
FBgn0031360	CG31937	-0.331192	-0.0148889	NS
FBgn0033170	sPLA2	-0.590375	0.36457	NS
FBgn0033127	Tsp42Ef	-0.213796	-0.211634	NS
FBgn0030311	CG11699	-0.478722	1.30362	NS
FBgn0032938	CG8671	-0.166654	-0.308169	NS
FBgn0004108	Nrt	0.314024	0.477949	NS
FBgn0036486	Msh6	0.191061	0.467687	NS
FBgn0003002	opa	0.420891	0.138038	NS
FBgn0028473	Non1	-0.347368	-0.180113	NS
FBgn0053971	Ir62a	-0.314328	0.394386	NS
FBgn0035371	AhcyL1	-0.224493	0.0964827	NS
FBgn0260934	par-1	-0.149338	-0.0787128	NS
FBgn0039489	CG5880	-0.254809	-0.0523563	NS
FBgn0015380	drl	0.427418	0.606267	NS
FBgn0286051	Rexo5	0.350153	0.137925	NS
FBgn0034141	CG8311	-0.306138	0.139009	NS
FBgn0032706	Irk3	-0.36576	-0.631783	NS
FBgn0005659	Ets98B	-0.197835	-0.171927	NS
FBgn0030693	CG8974	-0.122132	0.0605834	NS
FBgn0038795	CG4335	-0.83598	-0.593191	NS
FBgn0052438	SMC5	0.173066	0.47934	NS
FBgn0027512	CG10254	0.243004	0.428228	NS
FBgn0029911	CG14435	-0.210646	-0.157345	NS
FBgn0000541	E(bx)	0.159831	0.0748535	NS
FBgn0026309	aft	0.172711	-0.000679295	NS
FBgn0260748	CG5004	-0.14061	0.212994	NS
FBgn0032848	nesd	0.256389	0.720538	NS
FBgn0034408	sano	0.304046	0.17126	NS
FBgn0052369	CG32369	-0.171707	-0.0861866	NS
FBgn0036775	Rpc53	0.141518	0.00565338	NS
FBgn0030960	Atg101	-0.236723	0.115367	NS
FBgn0039470	CG6296	-0.925081	2.00188	NS
FBgn0030262	Vago	-0.769511	-0.198153	NS
FBgn0027569	cert	-0.194839	-0.322586	NS
FBgn0011737	Wee1	0.285441	-0.0150927	NS
FBgn0024361	Tsp2A	-0.403908	-0.173996	NS
FBgn0032774	CG17549	-0.263063	-0.138306	NS
FBgn0029512	Aos1	0.220539	0.113329	NS
FBgn0001233	Hsp83	0.261895	0.0822157	NS
FBgn0032170	CG4658	-0.175748	0.131339	NS
FBgn0037315	Cerk	-0.198996	-0.226152	NS
FBgn0015582	dare	-0.20678	-0.0671671	NS
FBgn0034289	CG10910	-0.879965	0.549273	NS
FBgn0042177	Arts	0.176545	0.269277	NS
FBgn0034035	CG8207	-0.204535	0.218466	NS
FBgn0260767	CG42565	-0.464383	0.48559	NS
FBgn0034085	Ptp52F	-0.423942	-0.221355	NS
FBgn0028375	heix	-0.147932	0.0657023	NS
FBgn0015794	Rab18	-0.189256	-0.0944683	NS
FBgn0000319	Chc	-0.19835	-0.220362	NS
FBgn0034057	CG8314	-0.204594	-0.0815558	NS
FBgn0037109	MED1	0.186472	0.142731	NS
FBgn0038820	CG4000	0.969159	0.243627	NS
FBgn0000108	Appl	0.233593	0.256986	NS
FBgn0033782	sug	-0.420221	-0.164341	NS
FBgn0010387	Acbp2	-0.635804	0.0659945	NS
FBgn0039530	Tusp	0.3536	-0.0822637	NS
FBgn0011305	Rsf1	0.24761	-0.016587	NS
FBgn0027529	tapas	-0.168296	0.0225405	NS
FBgn0026718	Agpat2	-0.449327	0.0491649	NS
FBgn0037894	Ranbp9	0.128829	-0.0122211	NS
FBgn0030329	prtp	-0.327773	-0.333903	NS
FBgn0051715	CG31715	-0.184469	-0.0279585	NS
FBgn0260991	Incenp	0.372692	1.44502	NS
FBgn0030607	dob	-0.48776	-0.0996357	NS
FBgn0039633	CG11873	0.220068	0.0113294	NS
FBgn0028526	CG15293	-0.884017	-0.311739	NS
FBgn0002873	mud	0.417702	1.6173	NS
FBgn0028408	Drep2	0.225292	0.980192	NS
FBgn0030660	CG8097	0.350359	0.220049	NS
FBgn0263772	CG43689	0.319776	0.158467	NS
FBgn0285937	Rab1	-0.144958	-0.0648805	NS
FBgn0034802	CNBP	0.242757	0.110041	NS
FBgn0087021	Spc25	0.362086	-0.198505	NS
FBgn0259876	Cap-G	0.255665	0.115169	NS
FBgn0026438	Eaat2	0.290048	0.0598858	NS
FBgn0039678	Obp99a	0.355607	1.36942	NS
FBgn0015391	glu	0.219903	0.418718	NS
FBgn0040236	c11.1	-0.291242	-0.170658	NS
FBgn0034300	CG5098	0.20275	0.0933227	NS
FBgn0261283	SREBP	-0.222479	-0.0760337	NS
FBgn0039040	CG13833	-1.70367	-0.211738	NS
FBgn0030641	CG6299	-0.258049	0.0703754	NS
FBgn0287234	slf	-0.445794	0.720954	NS
FBgn0061356	Hao	-0.439042	0.472287	NS
FBgn0039280	Mocs2B	-0.243801	-0.163077	NS
FBgn0036331	CR14117	-0.29312	0.16136	NS
FBgn0035227	Iml1	-0.285178	-0.299151	NS
FBgn0003159	CG2841	-0.267041	-0.120813	NS
FBgn0052056	scramb1	-0.244074	-0.073421	NS
FBgn0263738	Ada2a	0.60764	0.490998	NS
FBgn0032521	CG7110	0.272368	0.428842	NS
FBgn0035496	CG14990	-0.433558	-0.409893	NS
FBgn0027610	Dic1	-0.402361	0.212288	NS
FBgn0036746	Crtc	-0.118695	0.0535072	NS
FBgn0030638	CG11655	-0.306561	0.0596961	NS
FBgn0011606	Klp3A	0.279372	0.635605	NS
FBgn0036766	CG5506	-0.711744	1.49495	NS
FBgn0036752	Adgf-A	-0.42972	0.517791	NS
FBgn0038095	Cyp304a1	-0.620758	-1.20325	NS
FBgn0002899	mus301	0.208715	0.819958	NS
FBgn0027590	GstE12	-0.234295	-0.0717081	NS
FBgn0028894	GMF	-0.223933	-0.0275574	NS
FBgn0263392	Tet	0.259127	0.0255343	NS
FBgn0263235	Phae2	-1.31072	1.65935	NS
FBgn0033138	Tsp42Eq	-0.421965	-0.294426	NS
FBgn0259700	CG42354	-0.200537	-0.0298706	NS
FBgn0035620	Alp9	-0.942346	1.97077	NS
FBgn0030808	RhoGAP15B	-0.178625	0.0392315	NS
FBgn0039941	CG17167	-0.619964	0.317538	NS
FBgn0026402	NiPp1	0.265421	0.037716	NS
FBgn0026575	hang	0.187837	-0.0239386	NS
FBgn0035987	Cpsf5	0.22367	0.241606	NS
FBgn0262743	Fs(2)Ket	0.131617	0.164962	NS
FBgn0037719	bocks	-0.17515	-0.0406188	NS
FBgn0011666	msi	0.256551	0.189801	NS
FBgn0028369	kirre	0.322382	0.212378	NS
FBgn0003079	Raf	-0.312266	-0.0876646	NS
FBgn0029994	Ldsdh1	-0.501442	-0.566907	NS
FBgn0030777	CG9672	1.23446	1.74221	NS
FBgn0033005	CG3107	-0.201651	-0.10825	NS
FBgn0036787	CG4306	-0.300415	0.130074	NS
FBgn0015872	Drip	-0.321227	0.253058	NS
FBgn0261016	clos	0.379384	1.12968	NS
FBgn0026199	myo	-0.244517	-0.108547	NS
FBgn0052226	Pex23	0.138821	0.085985	NS
FBgn0013343	Syx1A	-0.180633	-0.360637	NS
FBgn0033273	Gasz	0.236026	0.134462	NS
FBgn0058198	CG40198	-1.23558	0.369879	NS
FBgn0039026	CG7029	-0.213215	-0.0264077	NS
FBgn0038462	EMC2A	0.29143	0.333581	NS
FBgn0086706	pix	-0.236236	-0.168464	NS
FBgn0003209	raw	-0.224606	-0.224824	NS
FBgn0003514	sqh	-0.187308	-0.16011	NS
FBgn0005775	Con	0.276356	0.975168	NS
FBgn0028506	CG4455	0.27468	0.441317	NS
FBgn0036354	Poc1	0.30994	0.609197	NS
FBgn0051755	SoYb	0.602824	1.68115	NS
FBgn0002709	mei-218	0.390044	0.38683	NS
FBgn0032258	Cog4	-0.222033	0.118891	NS
FBgn0011202	dia	-0.215872	0.0356271	NS
FBgn0001297	kay	-0.21464	-0.0571196	NS
FBgn0035926	Acbp5	-0.783078	1.3687	NS
FBgn0031682	CG5828	-0.259005	-0.114497	NS
FBgn0261049	Vps45	-0.18483	-0.219374	NS
FBgn0001134	Grd	0.480388	0.0776596	NS
FBgn0035154	hiro	-0.834784	0.955853	NS
FBgn0035253	Srrm234	0.146633	-0.012542	NS
FBgn0034387	Cyp12b2	-0.199426	-0.206007	NS
FBgn0058160	CG40160	-0.321413	-0.346606	NS
FBgn0014000	Hf	-0.435832	-0.256347	NS
FBgn0032248	Bug22	0.280425	0.0837524	NS
FBgn0032243	Klp31E	-0.167702	-0.142941	NS
FBgn0026179	siz	-0.180265	-0.0337276	NS
FBgn0261990	CG42808	0.321242	0.258079	NS
FBgn0036661	CG9705	0.197778	0.292604	NS
FBgn0032603	CG17928	-0.821852	-0.537829	NS
FBgn0031913	CG5958	-0.392609	-0.383097	NS
FBgn0003292	rt	-0.260119	0.398509	NS
FBgn0000346	comt	0.254508	0.34489	NS
FBgn0261801	CG42747	0.37725	0.362672	NS
FBgn0026721	fat-spondin	-0.467748	-0.254465	NS
FBgn0051116	ClC-a	-0.197578	-0.171971	NS
FBgn0024991	CG2694	0.22621	0.240517	NS
FBgn0010342	Map60	0.295992	0.277805	NS
FBgn0004654	Pgd	-0.355956	-0.0496032	NS
FBgn0026061	Mipp1	-0.515225	0.0565906	NS
FBgn0260965	CG42588	0.234942	0.00762259	NS
FBgn0028396	TotA	-1.46963	-1.5597	NS
FBgn0003068	per	0.964571	-0.0508647	NS
FBgn0034573	Sou	-0.250066	-0.176677	NS
FBgn0015805	HDAC1	0.191117	0.0755466	NS
FBgn0037060	CG10508	0.304067	-0.210249	NS
FBgn0035586	Fitm	-0.272189	0.103249	NS
FBgn0038763	PIG-L	-0.222322	-0.0634958	NS
FBgn0035995	CG3529	-0.186272	-0.268599	NS
FBgn0050424	CG30424	-0.253388	-0.415253	NS
FBgn0032213	CG5390	-0.231552	-0.081906	NS
FBgn0031474	CG2991	-0.243228	-0.0570329	NS
FBgn0286511	Pld	-0.243971	-0.0448245	NS
FBgn0285910	VhaAC39-1	-0.295121	-0.0210201	NS
FBgn0259111	Ndae1	-0.226751	-0.174239	NS
FBgn0027560	Tps1	-0.610412	-0.210474	NS
FBgn0015278	Pi3K68D	-0.161985	-0.0404792	NS
FBgn0003334	Scm	0.108659	0.0823272	NS
FBgn0011576	Cyp4d2	-0.329813	-0.216374	NS
FBgn0034002	CG8079	0.25026	0.230166	NS
FBgn0262512	Vha14-1	-0.234848	0.03846	NS
FBgn0035649	CG10483	-0.24215	0.073815	NS
FBgn0039025	Usp12-46	-0.305258	-0.242423	NS
FBgn0028734	Fmr1	0.172093	0.0846666	NS
FBgn0026147	TTLL4A	0.262942	0.0908271	NS
FBgn0030574	sbm	-0.301757	-0.117202	NS
FBgn0031012	CG8051	-0.494724	0.111608	NS
FBgn0026427	Su(var)2-HP2	0.146249	-0.0648023	NS
FBgn0012058	Cdc27	0.200596	0.0380607	NS
FBgn0038437	Sdhaf3	-0.318769	-0.0205851	NS
FBgn0270928	VAChT	0.375654	0.135852	NS
FBgn0037831	Cap-H2	0.154848	0.209063	NS
FBgn0036152	CG6175	-0.281451	0.200937	NS
FBgn0038172	Adgf-D	-0.639124	-0.410045	NS
FBgn0025549	unc-119	0.208593	0.0367967	NS
FBgn0005695	gcl	-0.205392	0.147402	NS
FBgn0002466	sti	0.26571	1.01915	NS
FBgn0259789	zld	0.222997	0.45699	NS
FBgn0038966	pinta	-0.346618	-0.215793	NS
FBgn0000157	Dll	0.597232	0.11537	NS
FBgn0015270	Orc2	0.252363	1.24649	NS
FBgn0039609	Nepl17	-1.08182	0.138337	NS
FBgn0003710	tipE	0.249182	0.273242	NS
FBgn0037878	CG6693	0.18708	0.218951	NS
FBgn0026582	Hmg-2	-0.302042	-0.152237	NS
FBgn0031636	CG12194	-0.560241	-0.129616	NS
FBgn0263979	Caf1-55	0.20058	0.0558167	NS
FBgn0034295	CG10911	-0.810267	1.29222	NS
FBgn0029506	Tsp42Ee	-0.127198	-0.20874	NS
FBgn0037551	Arl8	-0.152456	-0.101706	NS
FBgn0015929	dpa	0.241016	0.608123	NS
FBgn0287695	KFase	-0.498614	-0.0353659	NS
FBgn0262127	kibra	-0.17272	0.0486419	NS
FBgn0039102	SPE	-0.461175	0.0414778	NS
FBgn0000405	CycB	0.459686	1.82458	NS
FBgn0052483	CG32483	-0.845149	1.10412	NS
FBgn0004133	blow	0.233856	0.420172	NS
FBgn0028983	Spn55B	-0.330207	-0.102868	NS
FBgn0030447	CG2200	-0.124681	-0.110505	NS
FBgn0034430	mip40	0.183989	0.183395	NS
FBgn0015600	toc	0.190412	0.226205	NS
FBgn0000581	E(Pc)	0.152978	0.0729532	NS
FBgn0033788	CG13323	-0.899581	-0.311954	NS
FBgn0038313	CG4338	0.260856	0.389482	NS
FBgn0038545	pasi1	0.19602	0.2237	NS
FBgn0267975	vib	-0.125946	-0.126344	NS
FBgn0036286	CG10616	0.200008	-0.0915836	NS
FBgn0010350	Cds	-0.162302	0.0343845	NS
FBgn0015789	Rab10	-0.163729	-0.0910865	NS
FBgn0004657	mys	-0.193795	-0.121877	NS
FBgn0052803	CG32803	-0.19007	0.0486983	NS
FBgn0035449	CG14971	-0.313356	0.156652	NS
FBgn0020414	Idgf3	-0.638267	-0.130537	NS
FBgn0017581	Lk6	-0.250103	0.0137783	NS
FBgn0027581	CG6191	-0.216815	0.00441588	NS
FBgn0052528	parvin	-0.197604	-0.189799	NS
FBgn0034312	CG10916	-0.381459	-0.285205	NS
FBgn0015035	Cyp4e3	-1.75579	1.76942	NS
FBgn0259714	DIP-epsilon	-0.510259	-0.611496	NS
FBgn0250823	gish	0.137637	0.106052	NS
FBgn0030926	psh	-0.298176	-0.100498	NS
FBgn0037844	CG4570	0.338568	1.62518	NS
FBgn0030243	CG2186	0.16311	0.0813582	NS
FBgn0015379	dod	0.175634	0.0811906	NS
FBgn0013773	Cyp6a22	-0.619857	-0.124903	NS
FBgn0261986	RASSF8	0.279089	-0.147389	NS
FBgn0032821	CdGAPr	0.154655	0.0294264	NS
FBgn0027356	Amph	-0.312134	-0.111166	NS
FBgn0004839	otk	0.330248	0.0104227	NS
FBgn0016660	H15	0.439559	0.139823	NS
FBgn0260960	Baldspot	-0.278123	-0.00653708	NS
FBgn0036813	Atg3	-0.177638	-0.254817	NS
FBgn0036848	Naxd	-0.219393	-0.231491	NS
FBgn0034417	CG15117	-0.345012	-0.684161	NS
FBgn0039349	Ssadh	-0.311755	-0.140668	NS
FBgn0011802	Gem3	0.322532	0.139374	NS
FBgn0034059	CG8320	-0.220626	-0.120453	NS
FBgn0032705	Grip71	0.314777	0.416376	NS
FBgn0026577	CG8677	0.161235	-0.00646389	NS
FBgn0024963	GluClalpha	0.283451	-0.0353786	NS
FBgn0003463	sog	-0.244686	0.0353727	NS
FBgn0003462	Sod1	-0.168679	0.102425	NS
FBgn0023171	rnh1	-0.193979	-0.0800359	NS
FBgn0010352	Nc73EF	-0.335324	0.022114	NS
FBgn0028476	Usp1	0.157304	-0.0338354	NS
FBgn0264748	CG44006	-0.863606	-0.99925	NS
FBgn0036544	sff	0.291785	0.582377	NS
FBgn0050197	CG30197	-0.360509	-0.408997	NS
FBgn0003435	sm	0.442245	0.191392	NS
FBgn0010602	lwr	0.212034	0.201067	NS
FBgn0028979	tio	0.222189	-0.0974607	NS
FBgn0034179	CG6805	-0.135425	-0.136067	NS
FBgn0266000	CG44774	0.300074	0.391323	NS
FBgn0261556	CG42674	-0.154105	0.0576476	NS
FBgn0015774	NetB	0.208728	0.0561467	NS
FBgn0002774	mle	0.122747	0.0867051	NS
FBgn0036397	Nprl3	0.175193	-0.0794107	NS
FBgn0026787	Nhe1	-0.179095	-0.0695506	NS
FBgn0033446	CG1648	-0.231136	0.129623	NS
FBgn0039004	Nup133	0.127625	0.137325	NS
FBgn0027575	GABA-B-R2	0.230326	0.0732252	NS
FBgn0031359	Rim2	-0.203774	-0.020018	NS
FBgn0004431	LysX	-1.40529	-2.31902	NS
FBgn0051163	SKIP	0.424714	0.860357	NS
FBgn0025631	moody	-0.215404	-0.0106955	NS
FBgn0033155	Br140	0.150816	0.19743	NS
FBgn0010225	Gel	-0.274879	-0.106869	NS
FBgn0051321	CG31321	-0.385955	-0.0660228	NS
FBgn0037279	CG1129	-0.196444	-0.294176	NS
FBgn0027654	jdp	-0.206885	-0.15674	NS
FBgn0035878	CG7182	0.165616	0.142546	NS
FBgn0031646	snsl	-0.508297	0.506738	NS
FBgn0266019	rudhira	-0.242767	0.0367761	NS
FBgn0037110	ORMDL	-0.211883	0.0647023	NS
FBgn0038720	CG6231	-0.268437	0.0838619	NS
FBgn0039114	Lsd-1	-0.42195	-0.0488664	NS
FBgn0024184	unc-4	0.470546	-0.098418	NS
FBgn0029771	CG12730	-0.179807	-0.052493	NS
FBgn0039250	Mink	0.281968	0.555781	NS
FBgn0259715	CG42369	-1.12288	-0.0111324	NS
FBgn0033980	Cyp6a20	-0.82844	-3.76499	NS
FBgn0010424	TpnC73F	0.147468	0.962903	NS
FBgn0034391	CG15080	-0.717104	1.55032	NS
FBgn0035501	CG1299	-0.0626404	-0.870689	NS
FBgn0285925	Fas1	0.0923514	0.42464	NS
FBgn0262531	CG43085	-0.343309	5.23115	NS
FBgn0036332	Cul6	0.144864	0.634591	NS
FBgn0034253	CG10936	0.0748742	0.767037	NS
FBgn0039356	CG5039	0.0917932	0.514217	NS
FBgn0031693	Cyp4ac1	-0.277201	-2.01216	NS
FBgn0259229	CG42329	-0.135641	1.24917	NS
FBgn0038488	m-cup	0.172571	-0.411496	NS
FBgn0000053	Gart	0.272172	0.764914	NS
FBgn0028482	bdl	0.0926814	0.541104	NS
FBgn0033775	Cyp9h1	-0.181278	-1.26647	NS
FBgn0032805	CG10337	-0.181847	-0.578931	NS
FBgn0001253	ImpE1	-0.265925	3.40962	NS
FBgn0259896	NimC1	-0.0952433	-0.557916	NS
FBgn0036502	CG7841	0.0671975	0.379801	NS
FBgn0028939	NimC2	0.25385	-1.05858	NS
FBgn0266579	tau	-0.201124	-0.630868	NS
FBgn0033367	PPO2	-0.364931	-0.837239	NS
FBgn0052626	AMPdeam	-0.171858	-0.573069	NS
FBgn0011592	fra	0.22043	0.986592	NS
FBgn0028544	Vajk3	-0.488519	1.34526	NS
FBgn0033728	Cpr49Ae	-0.0646264	1.24483	NS
FBgn0033204	CG2065	-0.577761	-1.49237	NS
FBgn0032405	firl	-0.0415421	-1.05122	NS
FBgn0261285	Ppcs	0.089675	0.41917	NS
FBgn0039290	CG13654	0.0866003	-0.63732	NS
FBgn0026404	Dronc	-0.230183	-1.0425	NS
FBgn0030666	CG12708	0.440236	-1.9305	NS
FBgn0030617	CG9095	-0.215486	1.06904	NS
FBgn0022774	Oat	-0.195554	0.633808	NS
FBgn0036211	CG5946	-0.264412	-0.480718	NS
FBgn0266569	CG42259	0.187095	0.34402	NS
FBgn0033731	Cpr49Ah	0.160635	1.51847	NS
FBgn0261053	Cad86C	0.180266	0.634236	NS
FBgn0051809	CG31809	-0.779183	-1.42263	NS
FBgn0030271	CG15202	-0.223665	-0.841824	NS
FBgn0038420	CG10311	-0.133273	-0.577647	NS
FBgn0030665	CG15646	0.257336	-3.24323	NS
FBgn0051612	CG31612	0.180329	0.770685	NS
FBgn0031772	CG13994	-0.0970647	-0.431964	NS
FBgn0003444	smo	0.0676588	-0.351108	NS
FBgn0031713	Coq6	0.19693	0.414046	NS
FBgn0022359	Sodh-2	0.0911388	1.15725	NS
FBgn0030274	Lint-1	0.0126896	-0.433599	NS
FBgn0283437	PPO1	-0.5711	-0.888744	NS
FBgn0037721	CG9427	-0.169302	0.802883	NS
FBgn0030334	Karl	-0.553531	-0.408666	NS
FBgn0030189	CG2909	-0.029337	-0.528047	NS
FBgn0027865	Tsp96F	-0.116541	-0.450713	NS
FBgn0023537	CG17896	-0.0953551	0.329176	NS
FBgn0013771	Cyp6a9	-0.321152	-0.586959	NS
FBgn0015269	Nf1	-0.0182238	-0.35577	NS
FBgn0002534	Lcp3	-0.149078	1.46271	NS
FBgn0038474	mRpS11	0.0332034	0.444718	NS
FBgn0035187	Trh	0.0484162	-1.08863	NS
FBgn0002939	ninaD	-0.267701	-0.861418	NS
FBgn0085484	Pdxk	-0.312213	0.444964	NS
FBgn0029823	Shmt	-0.0260725	0.692568	NS
FBgn0028429	I-2	-0.0563546	-0.551858	NS
FBgn0036368	CG10738	-0.165329	0.607762	NS
FBgn0032002	CG8353	-0.276617	-0.958438	NS
FBgn0030612	Dbct	-0.115853	-0.330078	NS
FBgn0033397	Cyp4p3	-0.105844	-0.789974	NS
FBgn0038830	CG17272	-0.0340721	0.334716	NS
FBgn0038799	MFS9	-0.00642938	1.27222	NS
FBgn0039480	Cpr97Ea	0.172275	1.16065	NS
FBgn0034331	BomBc2	-1.60304	-0.600857	NS
FBgn0036291	CG10681	-0.0231068	-0.385005	NS
FBgn0036749	CG7460	-0.122355	1.19095	NS
FBgn0000024	Ace	0.0349101	0.926953	NS
FBgn0033668	exp	0.0287217	0.760923	NS
FBgn0034399	CG15083	-0.097131	0.433426	NS
FBgn0000052	Pfas	0.0119679	0.590032	NS
FBgn0034583	CG10527	-0.0873691	-0.45696	NS
FBgn0020416	Idgf1	-0.393638	-0.489294	NS
FBgn0052243	CG32243	-0.0844726	-0.391536	NS
FBgn0026602	Adk3	-0.416533	-0.565678	NS
FBgn0046875	Obp83g	-0.183218	1.32402	NS
FBgn0001311	kkv	-0.159983	1.13452	NS
FBgn0051445	CG31445	-0.00566571	-0.758375	NS
FBgn0086679	p	-0.0609107	-0.330674	NS
FBgn0038405	CG8927	0.0735442	2.02065	NS
FBgn0035348	CG16758	-0.241714	1.62396	NS
FBgn0036688	Fit2	0.136041	0.615787	NS
FBgn0030653	CG7860	-0.22601	-0.934771	NS
FBgn0038704	CG5316	0.0719505	0.243022	NS
FBgn0030309	CG1572	-0.0986496	-0.384291	NS
FBgn0040395	Unc-76	-0.0487521	-0.382659	NS
FBgn0033247	Nup44A	0.0850222	0.326556	NS
FBgn0052544	CG32544	0.221885	0.331751	NS
FBgn0031649	hoe2	-0.173574	-0.632419	NS
FBgn0038916	dnd	-0.0707537	1.06456	NS
FBgn0033755	ClC-b	-0.0796101	-0.251926	NS
FBgn0039296	Sil1	-0.135449	-0.485927	NS
FBgn0038385	Fbxl7	0.199302	0.649645	NS
FBgn0035462	IntS10	-0.00330907	-0.574198	NS
FBgn0035911	CG6638	-0.109308	0.36888	NS
FBgn0035916	GAPsec	-0.172262	-0.185744	NS
FBgn0037897	CG5270	-0.158465	-0.341571	NS
FBgn0037071	CG7632	-0.326518	-0.267202	NS
FBgn0033949	Had2	-0.280527	-0.538479	NS
FBgn0031418	CG3609	-0.233889	0.336342	NS
FBgn0011361	ND-ACP	-0.0678718	0.328422	NS
FBgn0035272	mRpL46	0.0373414	0.324212	NS
FBgn0038467	AdSL	-0.0361194	0.363483	NS
FBgn0038541	TyrRII	-0.0183809	-0.886189	NS
FBgn0035890	CG13667	-0.0024752	-0.22321	NS
FBgn0030520	Pdcd4	0.175757	0.967915	NS
FBgn0033308	CG8736	-0.374076	2.11182	NS
FBgn0261509	haf	-0.044942	1.28505	NS
FBgn0035283	CG12024	-0.0175064	-0.472966	NS
FBgn0035517	CG1265	-0.00898383	0.39465	NS
FBgn0014454	Acp1	-0.745685	1.30836	NS
FBgn0031939	CG13796	-0.215498	-0.601301	NS
FBgn0004034	y	0.508856	1.638	NS
FBgn0265052	St3	-0.252538	-0.525951	NS
FBgn0035868	CG7194	-0.100164	-0.605808	NS
FBgn0050339	CG30339	-0.461579	1.53695	NS
FBgn0085412	kmr	0.120702	0.786959	NS
FBgn0035656	CG10479	0.265301	0.496672	NS
FBgn0038832	CG15695	-0.165103	-0.483233	NS
FBgn0001091	Gapdh1	0.0883049	0.531961	NS
FBgn0034246	Dcr-2	-0.161002	-0.194368	NS
FBgn0000547	ed	0.288073	0.679067	NS
FBgn0033529	CG17765	-0.0946635	-0.224752	NS
FBgn0267378	sau	-0.111204	-0.31203	NS
FBgn0040102	lectin-24Db	-0.255801	-0.448821	NS
FBgn0003423	slgA	0.0202832	0.478377	NS
FBgn0038363	Acyp2	-0.0149479	0.231053	NS
FBgn0285913	red	-0.147368	0.201562	NS
FBgn0032810	CG13077	0.311383	0.926565	NS
FBgn0051778	CG31778	-0.472306	-0.40723	NS
FBgn0050285	CG30285	0.627548	0.858001	NS
FBgn0260861	Trs23	-0.139526	-0.301978	NS
FBgn0267347	squ	0.0803444	-0.964289	NS
FBgn0261456	hpo	-0.00878229	-0.192009	NS
FBgn0038349	AOX3	-0.15528	-0.292532	NS
FBgn0027280	l(1)G0193	-0.167237	0.171435	NS
FBgn0031766	CG9117	-0.171751	-0.323999	NS
FBgn0051064	CG31064	-0.0627329	-0.274475	NS
FBgn0033203	CG2070	-1.14043	-0.603918	NS
FBgn0039067	wda	0.0431186	-0.271508	NS
FBgn0033763	CG8646	-0.00329602	1.57948	NS
FBgn0259239	CG42337	0.260424	1.02028	NS
FBgn0025628	CG4199	-0.0814873	-0.503526	NS
FBgn0284221	Sema5c	0.0639671	0.26911	NS
FBgn0033174	CG11125	0.357252	0.941106	NS
FBgn0064237	Idgf5	-0.452904	-0.50889	NS
FBgn0025697	santa-maria	-0.384746	-0.455326	NS
FBgn0029002	miple2	0.208296	0.849272	NS
FBgn0034443	cer	-0.138918	-0.396322	NS
FBgn0028537	CG31775	0.385286	2.99517	NS
FBgn0005670	Cyp4d1	-0.154028	1.90985	NS
FBgn0037044	Pdss2	-0.0369096	0.212571	NS
FBgn0261647	Axud1	0.205279	0.234271	NS
FBgn0034974	CG16786	0.461436	1.02239	NS
FBgn0037244	CG14647	0.0215017	0.263897	NS
FBgn0035574	RhoGEF64C	-0.0676049	0.461744	NS
FBgn0266186	Vamp7	-0.19638	-0.241613	NS
FBgn0266369	Mtp	-0.187772	-0.455175	NS
FBgn0031974	CG12560	-0.193931	-0.266084	NS
FBgn0032020	strat	-0.026602	0.300986	NS
FBgn0010397	LamC	-0.156893	-0.265	NS
FBgn0028648	mRpL50	0.0171091	0.227882	NS
FBgn0031011	CG8034	-0.177711	-0.309457	NS
FBgn0034418	CG15118	-0.0710903	-0.21664	NS
FBgn0040718	CG15353	0.114726	-0.587045	NS
FBgn0034364	CG5493	-0.689724	-1.17572	NS
FBgn0031245	CG3625	0.279711	0.704958	NS
FBgn0010651	MFS14	-0.324339	-0.429718	NS
FBgn0027600	obst-B	-0.275609	0.621249	NS
FBgn0036062	CG6685	-0.682712	-1.33138	NS
FBgn0035252	CG7970	-0.194687	0.301208	NS
FBgn0032004	CG8292	0.50007	-0.645391	NS
FBgn0040337	CG3021	0.0916269	0.294838	NS
FBgn0023129	aay	-0.246548	0.619794	NS
FBgn0036290	CG10638	0.0996969	0.42334	NS
FBgn0032195	CG4908	-0.0316581	0.522184	NS
FBgn0039481	Cpr97Eb	0.0171258	0.842451	NS
FBgn0030766	mthl1	0.109298	0.298479	NS
FBgn0038107	CG17327	0.0696752	0.196713	NS
FBgn0034110	Atg9	-0.21525	-0.207919	NS
FBgn0039467	CG14253	-0.210176	-0.637328	NS
FBgn0085419	Rgk2	-0.324023	1.06073	NS
FBgn0036774	mRpS26	-0.132691	0.208482	NS
FBgn0259233	CG42331	-0.211885	-0.730496	NS
FBgn0086785	Vps36	-0.0358674	-0.117928	NS
FBgn0033742	Nepl10	-0.279739	-0.491691	NS
FBgn0010531	Ccs	-0.1139	0.189679	NS
FBgn0004381	Klp68D	-0.0484135	-0.316902	NS
FBgn0036985	zye	0.174512	1.0829	NS
FBgn0031879	uif	-0.0457692	0.702815	NS
FBgn0040736	BomS3	-0.466613	-0.493169	NS
FBgn0263351	AP-2mu	0.00741664	-0.224116	NS
FBgn0035104	CG13875	-0.0147489	0.596007	NS
FBgn0032773	fon	0.0152749	-0.374657	NS
FBgn0026077	Gasp	-0.21076	0.738517	NS
FBgn0033302	Cyp6a14	-0.411501	-0.662657	NS
FBgn0032538	Vajk2	-0.597384	1.15318	NS
FBgn0016754	sba	0.125427	0.333648	NS
FBgn0030912	CG6023	0.117458	0.450408	NS
FBgn0033820	CG4716	-0.197198	-0.396728	NS
FBgn0035533	Cip4	-0.0235443	0.249578	NS
FBgn0052641	CG32641	-0.0531766	-0.246475	NS
FBgn0037515	Sp7	-0.142971	-0.331773	NS
FBgn0037933	Ho	-0.156899	-0.185758	NS
FBgn0035964	Dhpr	-0.241384	-0.222686	NS
FBgn0034081	CG10731	0.0733806	0.27005	NS
FBgn0029648	CG3603	0.00190817	-0.297431	NS
FBgn0050418	nord	0.25869	1.05879	NS
FBgn0034756	Cyp6d2	-0.226409	-0.632292	NS
FBgn0032222	CG5037	-0.0753255	0.186321	NS
FBgn0038243	CG8066	-0.299717	-0.372278	NS
FBgn0032670	CG5783	-0.449066	-0.224163	NS
FBgn0031395	CG10874	-0.0624574	-0.266023	NS
FBgn0015714	Cyp6a17	-0.95756	-1.59956	NS
FBgn0031381	Npc2a	-0.338326	-0.769686	NS
FBgn0052675	Tango5	-0.119528	-0.296231	NS
FBgn0283649	elgi	0.150472	0.422717	NS
FBgn0013305	Nmda1	-0.0915331	-0.443143	NS
FBgn0039239	CG13641	0.249964	-0.255529	NS
FBgn0261363	PPO3	0.0838217	0.675712	NS
FBgn0086898	dgo	0.0234206	0.39206	NS
FBgn0028689	Rpn6	-0.00798913	-0.327503	NS
FBgn0032231	CG5056	-0.339948	-0.310445	NS
FBgn0035766	eco	-0.059965	0.972249	NS
FBgn0038681	Cyp12a4	-0.194224	-0.353515	NS
FBgn0043841	vir-1	-0.356926	-0.391111	NS
FBgn0261068	LSm7	-0.0911183	-0.397904	NS
FBgn0034335	GstE1	-0.0377973	-0.257237	NS
FBgn0031907	CG5171	-0.15554	-0.497621	NS
FBgn0020388	Gcn5	-0.155621	-0.222959	NS
FBgn0027343	fz3	0.0526319	0.334073	NS
FBgn0035398	Cht7	-0.278847	0.63042	NS
FBgn0035906	GstO2	0.0490954	0.290598	NS
FBgn0032726	CG10621	0.048324	0.56636	NS
FBgn0031307	MFS3	-0.0248284	0.583625	NS
FBgn0037386	CG1208	-0.578273	1.00459	NS
FBgn0286075	DNAlig3	-0.140069	-0.134021	NS
FBgn0031195	CG17600	-0.0257051	0.48131	NS
FBgn0003867	tsl	-0.034927	-0.520074	NS
FBgn0038013	CG10038	-0.00387508	-0.27488	NS
FBgn0034674	CG9304	-0.105131	-0.256233	NS
FBgn0051717	CG31717	-0.207556	-0.228449	NS
FBgn0003206	Ras64B	-0.101555	-0.140523	NS
FBgn0085320	CG34291	-0.440529	1.17231	NS
FBgn0038765	CG4424	-0.157195	-0.454978	NS
FBgn0051436	CG31436	-0.116675	-0.390745	NS
FBgn0262574	CG43114	-0.133134	1.36803	NS
FBgn0039223	CG5805	-0.0937675	0.211439	NS
FBgn0036510	SCCRO	0.0331692	0.0999338	NS
FBgn0020510	Abi	0.0320458	-0.315161	NS
FBgn0035282	CNMa	0.0818427	-0.742264	NS
FBgn0030662	Chsy	0.0144864	0.305008	NS
FBgn0039130	CG5854	0.0225576	-0.528607	NS
FBgn0033521	CG12896	1.74685	1.17598	NS
FBgn0010591	Sply	-0.215073	-0.31769	NS
FBgn0027791	O-fut2	-0.188427	0.299853	NS
FBgn0015754	Lis-1	-0.0679419	-0.155548	NS
FBgn0024947	NTPase	-0.180368	-0.308717	NS
FBgn0003285	rst	0.123037	0.435352	NS
FBgn0033644	Tret1-2	-0.219791	-1.445	NS
FBgn0014024	Rnp4F	0.114873	0.143338	NS
FBgn0013759	CASK	0.110119	0.367937	NS
FBgn0000719	fog	-0.108613	0.249601	NS
FBgn0026239	gukh	-0.515437	-0.463452	NS
FBgn0024194	rasp	-0.00365925	0.495663	NS
FBgn0033486	dmpd	0.135207	0.237457	NS
FBgn0035211	CG2211	-0.15589	-0.348855	NS
FBgn0036030	Prps	0.0366298	0.406941	NS
FBgn0264002	MsR2	0.175257	-0.365266	NS
FBgn0041205	key	-0.0900617	-0.264082	NS
FBgn0033381	GstE13	0.101733	0.383921	NS
FBgn0085245	CG34216	0.211736	0.660197	NS
FBgn0029959	Rab39	-0.153583	-0.324872	NS
FBgn0032681	CG10283	0.135294	0.339686	NS
FBgn0031668	CG31917	0.0459629	0.144434	NS
FBgn0027375	RecQ5	-0.0826207	0.269682	NS
FBgn0039381	SppL	0.278565	0.185365	NS
FBgn0032798	CG10132	0.356409	0.737884	NS
FBgn0259834	out	-0.102245	0.277727	NS
FBgn0000152	Axs	-0.048673	0.210441	NS
FBgn0035965	Use1	0.0530718	0.342995	NS
FBgn0022770	Peritrophin-A	-0.0297666	0.641964	NS
FBgn0039719	CG15515	-0.330857	0.514477	NS
FBgn0286818	Pdi	-0.0112686	-0.303298	NS
FBgn0053138	AGBE	-0.00126266	0.773689	NS
FBgn0039562	Gp93	0.0429838	-0.381608	NS
FBgn0033121	Cyp6u1	-0.0949614	0.140112	NS
FBgn0039612	Nepl19	-0.591546	-0.342824	NS
FBgn0032815	CG10462	-0.112252	0.418057	NS
FBgn0038922	Idh3b	-0.12805	0.333419	NS
FBgn0000084	AnxB10	-0.0105824	-0.238435	NS
FBgn0010226	GstS1	0.00661782	0.581359	NS
FBgn0032013	Scgalpha	0.147445	0.712543	NS
FBgn0024754	Flo1	-0.0733511	-0.136132	NS
FBgn0037852	Tpc1	0.0396348	-0.170763	NS
FBgn0035335	mRpL23	-0.0669593	0.241375	NS
FBgn0000542	ec	0.309096	0.291526	NS
FBgn0263762	CG43679	1.06422	1.09032	NS
FBgn0039712	CG15514	0.0687705	0.167848	NS
FBgn0028579	phtf	0.181763	0.177601	NS
FBgn0286222	Fum1	-0.225919	0.172857	NS
FBgn0031590	CG3702	-0.0821056	0.21716	NS
FBgn0039748	CG15529	-0.113024	0.428339	NS
FBgn0031048	CG12237	0.110906	0.237618	NS
FBgn0001296	kar	-0.0716447	0.444567	NS
FBgn0030595	CG14406	-0.174932	0.594642	NS
FBgn0034199	Gbp1	-0.206561	-0.402194	NS
FBgn0004629	Cys	-0.461187	-0.422229	NS
FBgn0027525	LTV1	-0.274148	-0.131551	NS
FBgn0033474	CG1407	-0.122711	-0.207717	NS
FBgn0052536	CG32536	0.0547852	-0.357626	NS
FBgn0037647	RagA-B	-0.167079	-0.226056	NS
FBgn0031449	CG31689	-0.245398	-0.322503	NS
FBgn0036773	CG13698	0.0934793	0.218339	NS
FBgn0001218	Hsc70-3	0.0873919	-0.420489	NS
FBgn0039805	Cpr100A	0.25328	0.961726	NS
FBgn0014877	Roe1	0.0496007	0.161844	NS
FBgn0031633	Fnta	-0.161554	-0.185592	NS
FBgn0051866	Ada1-2	-0.27842	-0.324784	NS
FBgn0034162	CG6426	-0.278874	-0.468492	NS
FBgn0013772	Cyp6a8	0.141715	-1.14444	NS
FBgn0033905	CG18324	0.0373967	0.113983	NS
FBgn0044511	mRpS21	0.00198993	0.240052	NS
FBgn0260431	CG42526	0.306257	0.377254	NS
FBgn0261976	Psf2	-0.236846	-0.275154	NS
FBgn0032054	Uba4	-0.0577153	0.557532	NS
FBgn0032849	mRpS18B	0.0531893	0.237883	NS
FBgn0038110	CG8031	-0.157657	-0.244447	NS
FBgn0025620	CG13360	-0.214629	-0.421928	NS
FBgn0037809	CG12818	-0.130181	-0.360059	NS
FBgn0036666	TSG101	-0.0710746	-0.289721	NS
FBgn0267001	Ten-a	0.316296	0.293352	NS
FBgn0061361	Tcs1	0.0976039	0.43169	NS
FBgn0004363	porin	-0.0558327	0.178428	NS
FBgn0034649	PIG-M	0.0222257	0.108867	NS
FBgn0259727	CG42381	-0.0112172	0.126241	NS
FBgn0033413	prel	-0.00641086	0.280335	NS
FBgn0031256	shv	-0.0571191	-0.335271	NS
FBgn0029161	slmo	-0.0554232	-0.161095	NS
FBgn0015011	AhcyL2	-0.212475	-0.47156	NS
FBgn0259994	OtopLa	0.543946	0.474779	NS
FBgn0015663	Ugt36A1	-0.114426	-0.451666	NS
FBgn0061360	CG33672	0.0611378	0.233306	NS
FBgn0040496	CG17104	0.156112	0.997727	NS
FBgn0033781	CG13319	-0.00501952	-0.213842	NS
FBgn0061359	Mvk	0.0944756	0.233306	NS
FBgn0264090	CG43759	0.172367	0.469314	NS
FBgn0033160	Dhx15	0.064811	0.188409	NS
FBgn0033749	achi	0.162895	-0.319306	NS
FBgn0031897	CG13784	-0.103405	-0.477361	NS
FBgn0036180	Duba	0.110599	-0.173568	NS
FBgn0046296	DEF8	-0.105167	-0.214063	NS
FBgn0032236	mRpS7	-0.131675	0.234793	NS
FBgn0266670	Sec5	-0.0651159	-0.10687	NS
FBgn0000559	eEF2	-0.177844	-0.147999	NS
FBgn0037312	CG11999	-0.056564	-0.338338	NS
FBgn0011672	Mvl	-0.181329	-0.19461	NS
FBgn0260859	Bet3	0.090089	0.133152	NS
FBgn0038925	Cchl	0.074741	0.218276	NS
FBgn0259098	CG42246	0.0443751	-0.322531	NS
FBgn0030887	CG6867	-0.251377	0.355012	NS
FBgn0035844	CG13676	0.1662	0.627961	NS
FBgn0032140	CG13117	-0.35989	-0.293139	NS
FBgn0013323	Ptth	-0.108939	-0.502351	NS
FBgn0266445	CG45075	0.820512	0.700358	NS
FBgn0025641	DAAM	0.0970193	0.770043	NS
FBgn0000636	Fas3	0.0940265	0.250923	NS
FBgn0000183	BicD	-0.0748526	0.284292	NS
FBgn0036342	CG11279	-0.090444	-0.240747	NS
FBgn0003943	Ubi-p63E	-0.0750588	-0.253846	NS
FBgn0027291	Idh3a	-0.0765939	0.362966	NS
FBgn0035996	CG3448	-0.0577929	-0.265622	NS
FBgn0029971	ND-MNLL	-0.0603253	0.233847	NS
FBgn0037228	CG1092	-0.0452502	-0.291213	NS
FBgn0030891	Ada3	0.0389781	0.20424	NS
FBgn0029594	Coa8	-0.0373534	0.107219	NS
FBgn0028550	Atf3	-0.275639	-0.304138	NS
FBgn0010768	sqz	0.156511	0.56407	NS
FBgn0037007	BNIP3	-0.307356	-0.258387	NS
FBgn0036715	Cad74A	0.0895829	0.542562	NS
FBgn0037713	CG16790	0.0407112	0.538407	NS
FBgn0036717	CG13731	-0.301661	0.934948	NS
FBgn0031459	HINT1	-0.112757	0.217891	NS
FBgn0036824	CG3902	-0.158364	-0.430153	NS
FBgn0011204	cue	-0.286983	0.398512	NS
FBgn0029976	snz	-0.116625	0.355962	NS
FBgn0085282	CG34253	-0.236728	-0.338523	NS
FBgn0034072	Dg	0.110008	0.27073	NS
FBgn0030763	CG9782	-0.281194	0.689198	NS
FBgn0033915	CG8485	0.0491218	-0.313969	NS
FBgn0031021	ND-18	-0.0821171	0.26261	NS
FBgn0038504	Sur-8	-0.0441552	0.126966	NS
FBgn0033459	CG12744	0.192624	0.899746	NS
FBgn0032387	CG16965	-0.777785	-1.17837	NS
FBgn0037644	CG11964	-0.0314771	0.361932	NS
FBgn0033129	Tsp42Eh	-0.182661	-0.369608	NS
FBgn0027562	CG10345	-0.421373	-0.437536	NS
FBgn0027090	GlnRS	-0.0727533	0.252629	NS
FBgn0033919	CG8547	-0.0272998	-0.234498	NS
FBgn0035936	Tsp66E	-0.150653	0.484437	NS
FBgn0050021	metro	0.271809	0.347595	NS
FBgn0038828	CG17270	0.0781673	0.780559	NS
FBgn0019957	ND-42	-0.101118	0.266016	NS
FBgn0263118	tx	-0.0478645	-0.244092	NS
FBgn0052638	CG32638	-0.129891	-0.436505	NS
FBgn0040832	CG8012	-0.64735	-0.305384	NS
FBgn0037200	CG11109	-0.0744471	0.150245	NS
FBgn0023529	CG2918	-0.101524	-0.303925	NS
FBgn0035264	Oseg4	-0.212922	0.598955	NS
FBgn0032720	mRpL13	-0.10027	0.270277	NS
FBgn0034083	lbk	0.072286	0.222562	NS
FBgn0034729	CG10344	0.0196069	0.334801	NS
FBgn0261341	verm	-0.188509	0.602458	NS
FBgn0010423	TpnC47D	-0.208897	-0.52334	NS
FBgn0037714	CG9396	-0.198176	0.407204	NS
FBgn0033101	CG9436	-0.0345231	0.214633	NS
FBgn0053926	CG33926	-0.453703	1.89397	NS
FBgn0083962	CG34126	-0.135465	-0.134877	NS
FBgn0053099	CG33099	-0.176021	-0.580639	NS
FBgn0032536	Ance-3	0.10547	-0.264104	NS
FBgn0002716	mei-W68	0.197196	-0.591483	NS
FBgn0033724	CG8501	0.135066	-0.398431	NS
FBgn0040391	CG2854	0.140697	-1.04749	NS
FBgn0035155	RabX6	-0.0837669	-0.255839	NS
FBgn0031877	Hmgcl	-0.30755	-0.274775	NS
FBgn0046878	Obp83cd	-0.776353	-0.336089	NS
FBgn0031885	Mnn1	-0.0230533	0.302651	NS
FBgn0001128	Gpdh1	-0.188896	0.521272	NS
FBgn0026259	eIF5B	-0.022082	0.214462	NS
FBgn0014009	Rab2	-0.11878	-0.178831	NS
FBgn0029082	hbs	0.141115	0.823515	NS
FBgn0036032	CG16711	0.171134	0.172255	NS
FBgn0000008	a	-0.0305718	0.237471	NS
FBgn0034063	CG8389	-0.032158	-0.185757	NS
FBgn0027864	Ogg1	-0.240269	-0.408113	NS
FBgn0287478	Camta	0.120177	0.174197	NS
FBgn0259481	Mob2	-0.100869	-0.250203	NS
FBgn0027259	Kmn1	-0.206374	1.0696	NS
FBgn0031161	CG15445	-0.00116022	-0.147369	NS
FBgn0050359	Mal-A5	-0.0900761	0.259162	NS
FBgn0028970	betaggt-II	-0.167738	-0.0976315	NS
FBgn0259711	CG42365	-0.166684	-0.356281	NS
FBgn0039642	CG11882	0.129852	-0.202592	NS
FBgn0033633	Smyd4-3	0.0299062	0.469913	NS
FBgn0000056	Adhr	0.0136156	0.691534	NS
FBgn0031298	Atg4a	-0.0665788	-0.229535	NS
FBgn0034744	Vps20	-0.137791	-0.144682	NS
FBgn0050476	ave	-0.0245558	-0.264598	NS
FBgn0037891	CG5214	-0.015861	0.283181	NS
FBgn0025583	BomS2	-0.230578	-0.54192	NS
FBgn0041182	Tep2	-0.322354	-0.367966	NS
FBgn0037656	CG11986	0.1125	0.263478	NS
FBgn0037026	CG3634	0.0595091	0.114493	NS
FBgn0000635	Fas2	0.0354349	0.189014	NS
FBgn0036587	CG4950	0.222327	-0.322535	NS
FBgn0083968	CG34132	-0.036498	0.339599	NS
FBgn0066303	CG33932	0.0261671	0.155121	NS
FBgn0015522	olf186-M	-0.351157	-0.159559	NS
FBgn0031948	CG7149	-0.241169	-0.584242	NS
FBgn0051643	CG31643	-0.129496	-0.164227	NS
FBgn0040397	CG3655	-0.0940619	0.242122	NS
FBgn0061469	Ube3a	0.0592485	-0.139559	NS
FBgn0052816	CG32816	-0.0598572	0.571177	NS
FBgn0033519	CG11825	0.189803	0.760336	NS
FBgn0000566	Eip55E	-0.00885252	0.172866	NS
FBgn0016672	Ipp	0.00258328	0.104244	NS
FBgn0035960	CG4942	-0.0597927	-0.202601	NS
FBgn0028936	NimB5	-0.287989	-0.239747	NS
FBgn0030434	Brms1	0.124367	0.176685	NS
FBgn0036199	Bmcp	-0.0875501	0.273367	NS
FBgn0001124	Got1	-0.0940148	-0.142337	NS
FBgn0041629	Hexo2	-0.359557	-0.387396	NS
FBgn0051955	CG31955	-0.282116	-0.54545	NS
FBgn0265274	Inx3	0.0940436	-0.255555	NS
FBgn0085736	CG40472	0.0658418	0.236521	NS
FBgn0261625	GLS	-0.243475	0.669244	NS
FBgn0033117	CG3358	0.0162967	0.222351	NS
FBgn0033100	CG3420	-0.0991408	0.209305	NS
FBgn0264078	Flo2	-0.168154	-0.212459	NS
FBgn0002023	Lim3	-0.0614603	-0.522047	NS
FBgn0051678	CG31678	0.124736	0.14072	NS
FBgn0032850	Kua	-0.288694	0.616178	NS
FBgn0264959	Src42A	0.0350663	0.178829	NS
FBgn0037610	CG8043	0.161446	0.213484	NS
FBgn0250732	gfzf	-0.021019	0.220059	NS
FBgn0033973	HPS1	-0.0908093	-0.194753	NS
FBgn0035266	Gk2	-0.233329	0.337978	NS
FBgn0284257	Ttd14	-0.250346	0.250505	NS
FBgn0028699	Rh50	-0.461278	-0.25896	NS
FBgn0001186	Hex-A	-0.202374	0.333887	NS
FBgn0023001	melt	-0.114395	0.247473	NS
FBgn0031261	nAChRbeta3	-0.286172	-0.388501	NS
FBgn0029147	NtR	-0.263207	-0.335959	NS
FBgn0031264	CG11835	0.198572	0.47512	NS
FBgn0034315	CG5721	-0.0703697	-0.1116	NS
FBgn0029943	Atg5	-0.0946939	-0.0990989	NS
FBgn0003117	pnr	0.183336	-0.344475	NS
FBgn0039326	CG10562	-0.322046	-0.424976	NS
FBgn0038299	Spn88Eb	-0.174606	-0.241602	NS
FBgn0034267	CG4984	-0.0457838	0.54415	NS
FBgn0259730	tal-1A	-0.0664614	0.463893	NS
FBgn0010220	Dbp45A	-0.0201793	0.25813	NS
FBgn0003071	Pfk	0.0294531	0.262131	NS
FBgn0266464	Nsf2	-0.0513033	-0.255417	NS
FBgn0002641	mal	-0.246994	-0.281491	NS
FBgn0028515	EndoGI	0.00811282	-0.144021	NS
FBgn0010333	Rac1	-0.0228091	0.0806636	NS
FBgn0034407	DptB	-1.87758	-1.39068	NS
FBgn0051769	CG31769	-0.662584	-0.280664	NS
FBgn0035540	Syx17	-0.20123	-0.261464	NS
FBgn0045761	CHKov1	-0.115383	-0.251901	NS
FBgn0035827	Srp9	0.0663375	0.167019	NS
FBgn0032818	CG10628	0.0371601	0.262952	NS
FBgn0086446	DCTN6-p27	-0.034758	-0.203494	NS
FBgn0050423	CG30423	-0.00598095	-0.138876	NS
FBgn0051320	HEATR2	0.455712	0.38307	NS
FBgn0086707	ncm	0.114131	0.280778	NS
FBgn0037525	CG17816	0.157267	0.331069	NS
FBgn0035986	CG4022	0.140789	0.449826	NS
FBgn0032053	mRpL51	0.00458161	0.33175	NS
FBgn0028862	dao	0.472316	0.342874	NS
FBgn0000244	by	-0.118269	-0.242145	NS
FBgn0011236	ken	0.117386	0.245288	NS
FBgn0030056	CAH3	-0.109212	0.15856	NS
FBgn0029801	CG15771	-0.114731	0.242162	NS
FBgn0041581	AttB	-1.64117	-1.80864	NS
FBgn0038631	CG7695	-0.528776	-0.546392	NS
FBgn0000083	AnxB9	-0.0940865	-0.212376	NS
FBgn0260858	Ykt6	-0.062113	0.146058	NS
FBgn0051675	CG31675	-0.225656	-0.0662709	NS
FBgn0263278	Fic	-0.131705	-0.175253	NS
FBgn0025693	ZnT41F	-0.194951	-0.332469	NS
FBgn0023130	a6	0.139414	0.218124	NS
FBgn0039131	CG12268	-0.399678	0.678308	NS
FBgn0031454	HemK2	0.142409	0.314482	NS
FBgn0031250	Ent1	-0.124307	-0.248577	NS
FBgn0085425	CG34396	-0.0509099	-0.290011	NS
FBgn0031643	CG3008	-0.160681	-0.174838	NS
FBgn0004811	fs(2)ltoPP43	0.0583993	-0.287644	NS
FBgn0086355	Tpi	0.0117346	0.293262	NS
FBgn0032402	PLCXD	0.34731	-0.346549	NS
FBgn0000017	Abl	-0.0470106	-0.544605	NS
FBgn0033480	mRpL42	0.0193502	0.318493	NS
FBgn0000416	Sap-r	-0.301169	-0.132417	NS
FBgn0031490	CG17264	0.830932	0.789999	NS
FBgn0086443	AsnRS	0.0519859	0.288567	NS
FBgn0035427	ckd	0.248825	0.411626	NS
FBgn0033194	Vps13	-0.125024	-0.231911	NS
FBgn0051092	LpR2	-0.0856704	-0.421827	NS
FBgn0037873	SdhC	-0.0343977	0.342567	NS
FBgn0036959	CG6951	0.0775913	0.309221	NS
FBgn0034718	wdp	-0.243642	-0.285938	NS
FBgn0024555	flfl	0.0765989	-0.0945723	NS
FBgn0033904	CG18327	-0.159937	0.250085	NS
FBgn0016038	Vsp37A	-0.031734	0.185365	NS
FBgn0004427	LysD	0.254738	-1.76239	NS
FBgn0024689	fws	-0.0117787	0.0715207	NS
FBgn0037835	CG14687	0.0690985	-0.167199	NS
FBgn0032404	RpL7-like	0.0702975	0.301993	NS
FBgn0033571	Rpb5	0.130838	0.336149	NS
FBgn0053087	LRP1	-0.0168642	-0.223935	NS
FBgn0000116	Argk	-0.12825	-0.193281	NS
FBgn0262057	Spn77Ba	-0.0965001	-0.308976	NS
FBgn0051028	CG31028	-0.0225094	0.630207	NS
FBgn0052407	CG32407	-0.370973	-0.407632	NS
FBgn0030694	CG15602	-0.109988	-0.210325	NS
FBgn0033717	CG8839	-0.149566	-0.305719	NS
FBgn0053523	CG33523	-0.105597	-0.1729	NS
FBgn0039800	Npc2g	-0.286193	-0.398865	NS
FBgn0263093	CR43361	-0.25207	-0.851948	NS
FBgn0040228	DCTN5-p25	-0.0812441	-0.0915358	NS
FBgn0031479	Prx6005	-0.0537527	0.25814	NS
FBgn0010383	Cyp18a1	0.11129	0.288592	NS
FBgn0032422	atilla	-0.0821337	-0.257169	NS
FBgn0030853	ND-24	-0.0594779	0.257448	NS
FBgn0263220	Hk	0.0575593	0.244108	NS
FBgn0261277	rtv	0.0311022	-0.526732	NS
FBgn0032084	CG13101	0.047059	0.149402	NS
FBgn0000055	Adh	-0.0055745	0.619988	NS
FBgn0031745	rau	-0.00971951	0.566574	NS
FBgn0051414	Gba1b	-0.285831	0.455615	NS
FBgn0030350	SelG	-0.166804	-0.0985262	NS
FBgn0051183	CG31183	-0.304829	-0.368615	NS
FBgn0036142	Adck5	0.184257	0.152723	NS
FBgn0003162	Pu	0.122527	0.192976	NS
FBgn0035206	sturkopf	-0.115898	-0.136878	NS
FBgn0028543	NimB2	-0.297672	-0.266949	NS
FBgn0023458	Rbcn-3A	-0.0738282	0.115136	NS
FBgn0035623	mthl2	-0.535175	-0.431832	NS
FBgn0085376	CG34347	0.238581	0.45669	NS
FBgn0051864	Qtzl	-0.247568	-0.198234	NS
FBgn0043578	PGRP-SB1	-1.08239	-0.907339	NS
FBgn0031384	CG4238	0.129876	0.258444	NS
FBgn0260972	alc	-0.0386728	0.303035	NS
FBgn0041627	Ku80	-0.237224	-0.496293	NS
FBgn0052091	CG32091	-0.300304	-0.426629	NS
FBgn0001089	Gal	-0.733487	-0.59288	NS
FBgn0040230	dbo	0.115183	0.18292	NS
FBgn0082585	sprt	0.083094	0.333014	NS
FBgn0067622	LSm-4	0.0337951	0.215782	NS
FBgn0035771	Sec63	-0.0932045	-0.15354	NS
FBgn0262599	SmydA-3	0.153427	0.88665	NS
FBgn0035059	CG3894	0.0817863	-0.119088	NS
FBgn0017430	Nelf-E	0.30038	0.167277	NS
FBgn0263705	Myo10A	0.0746454	0.351464	NS
FBgn0035876	Pex2	-0.211222	-0.164038	NS
FBgn0031251	CG4213	-0.11145	-0.219332	NS
FBgn0052029	Cpr66D	0.42028	-1.22984	NS
FBgn0035959	CG4911	-0.131385	0.190637	NS
FBgn0004397	Vinc	-0.118366	-0.2137	NS
FBgn0035039	Adck1	0.22533	0.368244	NS
FBgn0030511	CG11158	-0.139608	-0.231494	NS
FBgn0030305	Uba5	0.0266963	0.183045	NS
FBgn0250755	CG42233	0.0345407	-0.107321	NS
FBgn0017578	Max	-0.022438	-0.131728	NS
FBgn0032935	Atg18b	-0.258284	-0.212466	NS
FBgn0039709	Cad99C	-0.0147851	0.336239	NS
FBgn0013762	Cdk5	-0.112431	-0.140491	NS
FBgn0034261	HPS4	-0.102142	-0.263348	NS
FBgn0038582	CG7988	-0.0403379	-0.102059	NS
FBgn0026878	CG4325	-0.388899	0.295211	NS
FBgn0086676	spin	-0.0715221	-0.334567	NS
FBgn0039741	CG7943	-0.0815977	0.164407	NS
FBgn0063923	Kaz1-ORFB	-0.376371	-0.659871	NS
FBgn0039625	beta4GalNAcTB	0.00812513	0.363151	NS
FBgn0260755	CG42553	0.0548242	-0.143595	NS
FBgn0037151	CG7130	-0.158361	-0.933533	NS
FBgn0031535	CG12795	0.116627	-0.340367	NS
FBgn0011760	ctp	-0.0279684	-0.18632	NS
FBgn0030839	CG5613	-0.0813777	-0.210388	NS
FBgn0012042	AttA	-1.10305	-1.37082	NS
FBgn0050148	CG30148	-0.235283	-1.00136	NS
FBgn0262962	CG43273	-0.248575	-0.229284	NS
FBgn0040392	CG14050	-0.517155	-0.95653	NS
FBgn0085384	CG34355	0.217564	-0.285624	NS
FBgn0031002	CG14196	-0.295291	-0.321152	NS
FBgn0042127	CG18789	0.438893	0.526378	NS
FBgn0038224	ATPsynE	-0.00727465	0.309136	NS
FBgn0032017	CG7810	-0.090259	-0.113038	NS
FBgn0035436	CG12016	-0.29836	-0.153807	NS
FBgn0034054	CG8366	0.379815	0.448771	NS
FBgn0035434	Drsl5	1.5539	2.96399	NS
FBgn0051935	CG31935	-0.0984139	-0.110083	NS
FBgn0013995	Calx	-0.0565859	0.306728	NS
FBgn0051248	CG31248	-0.285722	-0.290271	NS
FBgn0266487	CG45086	-0.141261	-0.215334	NS
FBgn0030425	Nep6	-0.496657	-0.274294	NS
FBgn0031536	Cog3	-0.0863178	-0.151453	NS
FBgn0025630	Rtca	0.0434317	-0.417722	NS
FBgn0036698	CG7724	-0.950951	-1.30772	NS
FBgn0032843	CG10730	-0.324345	-0.603712	NS
FBgn0003520	stau	0.11422	0.241126	NS
FBgn0259228	C3G	-0.0290455	0.19995	NS
FBgn0040259	Ugt302C1	-0.0651319	-0.247531	NS
FBgn0086365	Orct2	-0.332313	-1.24331	NS
FBgn0038129	TBC1D5	-0.174666	-0.379391	NS
FBgn0034258	eIF3c	-0.111047	-0.0769351	NS
FBgn0015239	Hr78	0.0816182	-0.330351	NS
FBgn0046685	Wsck	-0.0485671	-0.0931915	NS
FBgn0023508	Ocrl	0.0295973	0.120371	NS
FBgn0043362	bchs	-0.0515207	-0.324949	NS
FBgn0033654	Sobp	0.0265287	0.145156	NS
FBgn0010415	Sdc	-0.0493414	-0.244112	NS
FBgn0033987	ckn	0.114181	0.156	NS
FBgn0259878	Fs	0.488943	0.502282	NS
FBgn0039561	mfrn	0.0944485	0.201247	NS
FBgn0032899	CG9338	-0.0137046	-0.134359	NS
FBgn0032886	CG9328	-0.0639038	0.287493	NS
FBgn0030102	SmydA-9	-0.174806	-0.16356	NS
FBgn0031357	mRpL48	0.0478502	0.223487	NS
FBgn0000579	Eno	-0.0524683	0.26806	NS
FBgn0034087	clu	-0.0802829	0.310324	NS
FBgn0035251	Vta1	-0.0495037	-0.139284	NS
FBgn0029939	CG9650	0.212451	0.967547	NS
FBgn0025802	Sbf	-0.00286282	-0.152873	NS
FBgn0035076	Ance-5	-0.344013	-0.346834	NS
FBgn0031399	mio	-0.04202	-0.0953482	NS
FBgn0003067	Pepck1	-0.486645	0.670728	NS
FBgn0026702	Pop1	0.0709657	0.588622	NS
FBgn0030964	Pvf1	-0.237842	0.240337	NS
FBgn0004395	unk	0.363551	0.184155	NS
FBgn0027655	htt	-0.156505	-0.176922	NS
FBgn0010388	Dro	-1.33252	-1.44381	NS
FBgn0268063	ltl	-0.106488	-0.21311	NS
FBgn0051687	CG31687	0.118267	0.213001	NS
FBgn0035798	frac	-0.227779	1.06927	NS
FBgn0263757	Rpb4	0.0971358	0.252207	NS
FBgn0030100	CG12106	-0.0984161	0.355069	NS
FBgn0033028	hrm	0.013903	0.10698	NS
FBgn0025680	cry	0.355386	0.345726	NS
FBgn0037877	CG6689	-0.0958326	0.156737	NS
FBgn0030718	ND-20	-0.0944728	0.305816	NS
FBgn0265413	CG44325	-0.0893659	-0.275022	NS
FBgn0260940	lsn	0.0475711	0.192683	NS
FBgn0261859	CG42788	-0.0395073	-0.418153	NS
FBgn0037199	EMC4	0.0143649	0.16275	NS
FBgn0001989	ND-B17	0.0178759	0.223728	NS
FBgn0032078	C1GalTA	-0.00231043	0.26192	NS
FBgn0032076	Argl	-0.401338	0.422065	NS
FBgn0033934	CG17385	0.0154419	0.159865	NS
FBgn0030659	CG9215	0.162331	0.291518	NS
FBgn0034420	CG10737	-0.102708	-0.214138	NS
FBgn0085421	Epac	-0.0560553	0.304765	NS
FBgn0038326	CG5044	-0.0629728	0.345006	NS
FBgn0027790	GV1	0.00408609	-0.225267	NS
FBgn0000078	Amy-d	-0.948291	-1.53096	NS
FBgn0030793	Rai1	0.0531878	0.870001	NS
FBgn0030362	regucalcin	-0.262766	-0.386496	NS
FBgn0032973	CG6675	0.685174	0.536342	NS
FBgn0027052	STUB1	-0.0744795	0.171121	NS
FBgn0015766	Msr-110	-0.284714	-0.175686	NS
FBgn0038432	CG14883	-0.0775716	0.220503	NS
FBgn0020278	loco	-0.123401	-0.274068	NS
FBgn0002930	nec	-0.0697571	-0.217406	NS
FBgn0024277	trio	0.0640961	0.11133	NS
FBgn0030183	Ypel	-0.129876	-0.347773	NS
FBgn0050290	Ppcdc	-0.0174152	0.053538	NS
FBgn0052499	Cda4	-0.12161	0.48432	NS
FBgn0033555	RpS15Ab	0.196573	0.328251	NS
FBgn0027080	TyrRS	-0.115453	-0.0743005	NS
FBgn0039486	CAH9	-0.19477	-0.314613	NS
FBgn0085220	Ufm1	-0.0872217	0.27601	NS
FBgn0031344	CG7420	-0.0739426	-0.1223	NS
FBgn0039358	CG5028	-0.0947072	0.216091	NS
FBgn0025615	Torsin	-0.0321876	0.164113	NS
FBgn0000543	ecd	-0.0545544	-0.184481	NS
FBgn0267795	Frl	-0.0553846	-0.214277	NS
FBgn0034383	CG17821	0.90811	0.975591	NS
FBgn0036381	CG8745	-0.435739	-0.259376	NS
FBgn0037963	Cad87A	0.30214	0.27879	NS
FBgn0013718	nuf	-0.00854656	-0.208791	NS
FBgn0024986	CG3719	-0.137917	-0.176766	NS
FBgn0024889	Kap-alpha1	0.0745333	-0.160541	NS
FBgn0038788	Sirt2	0.0275369	-0.129694	NS
FBgn0015229	glec	0.0596594	0.280793	NS
FBgn0030251	CG2145	-0.247638	-0.309077	NS
FBgn0035780	CG18417	0.707771	-1.66281	NS
FBgn0085397	Fili	0.359538	-0.373758	NS
FBgn0039557	CG12259	0.0587322	0.250686	NS
FBgn0042178	Apl	-0.0110099	-2.96821	NS
FBgn0039886	CG2003	-0.211204	-0.353776	NS
FBgn0031263	Tspo	-0.303655	-0.190929	NS
FBgn0030485	CG1998	0.18565	-0.360593	NS
FBgn0250838	roh	0.0468395	0.269833	NS
FBgn0051475	CG31475	-0.0673362	0.572563	NS
FBgn0033734	CG8520	-0.0112947	0.131361	NS
FBgn0039630	CG11843	-0.0734598	0.50536	NS
FBgn0283473	S6KL	-0.19531	-0.0776182	NS
FBgn0036622	Agpat4	-0.374038	0.246599	NS
FBgn0039068	Pex11c	-0.206463	0.274483	NS
FBgn0040089	meso18E	-1.04461	-0.368357	NS
FBgn0026566	CG1307	0.0768982	0.222227	NS
FBgn0035142	Hipk	0.130156	0.195903	NS
FBgn0265605	Ric	-0.075629	0.0884024	NS
FBgn0086371	poly	0.0475668	0.217413	NS
FBgn0031491	alpha4GT1	-0.073085	-0.239627	NS
FBgn0033249	CG11191	0.122689	0.635557	NS
FBgn0051793	CG31793	-0.105459	0.272143	NS
FBgn0259991	CG42488	-0.0705964	0.178047	NS
FBgn0033086	CG9410	0.0554808	0.223239	NS
FBgn0263131	CG43373	0.102015	0.569852	NS
FBgn0039169	Spps	-0.0401793	0.148309	NS
FBgn0005612	Sox14	-0.063043	-0.354343	NS
FBgn0027584	CG4757	0.0580666	0.433133	NS
FBgn0040817	CG14132	0.143678	0.530447	NS
FBgn0004598	Fur2	0.0447982	0.283506	NS
FBgn0263240	Coop	0.210739	0.198363	NS
FBgn0011455	ND-SGDH	-0.180777	0.285386	NS
FBgn0085319	CG34290	0.0662729	0.85808	NS
FBgn0013347	TfIIA-S	-0.00462866	0.176093	NS
FBgn0261555	CG42673	0.235454	0.320437	NS
FBgn0032801	CG10165	-0.320989	-0.279042	NS
FBgn0039537	Hsdl2	-0.380061	0.183845	NS
FBgn0031940	CG7214	-0.92126	0.748361	NS
FBgn0038515	CG5823	0.103976	0.134159	NS
FBgn0025336	CG4882	-0.117925	0.213733	NS
FBgn0025684	MFS18	0.14504	0.205092	NS
FBgn0036842	Ugt316A1	0.0544588	0.0675569	NS
FBgn0243514	eater	-0.303555	-0.599532	NS
FBgn0039636	Atg14	-0.0642008	-0.154358	NS
FBgn0038857	Bdbt	0.00172694	0.185605	NS
FBgn0033538	CG11883	-0.238258	0.337758	NS
FBgn0036887	CG9231	-0.132562	0.13886	NS
[truncated: 6,438 more rows]

## Sheet: (B) Metab. Regime Lar v Ad
Metabolite	Log2FC_Regime_Larvae	Log2FC_Regime_Adults	Category
LACTATE	-0.266053	-0.122914	q < 0.1
ISOLEUCINE	-0.536036	-0.31039	q < 0.1
AGMATINE	-0.672852	0.474581	q < 0.1
DEOXYGUANOSINE	-0.717432	-1.29514	q < 0.1
ETHANOLAMINE	-0.229108	-0.241172	q < 0.1
GUANOSINE	-0.399757	-0.531442	q < 0.1
N-ACETYLASPARTATE	0.18712	0.385691	q < 0.1
2-/3-PHOSPHOGLYCERATE	0.456329	0.385222	q < 0.1
HISTIDINOL	-0.38913	-0.365313	q < 0.1
VALINE	-0.339023	-0.247611	q < 0.1
GLYCERATE	-0.481231	0.0748759	q < 0.1
GUANINE	-0.481324	-0.869117	q < 0.1
METHYLTHIOADENOSINE	0.320826	-0.541081	q < 0.1
GLYCEROL 3-PHOSPHATE	0.412323	0.669666	q < 0.1
FAD	-0.176515	-0.292879	q < 0.1
THREONINE	-0.358595	-0.268435	q < 0.1
NICOTINAMIDE	-0.286346	-0.534476	q < 0.1
GAMMA-AMINOBUTYRATE (GABA)	0.153	0.677639	q < 0.1
NICOTINATE	-0.282497	-0.327811	q < 0.1
URIDINE	-0.157552	-0.199507	q < 0.1
LEUCINE	-0.358749	-0.204866	q < 0.1
N-ACETYLGLUTAMATE	0.220319	0.66745	NS
PANTOTHENATE	-0.311564	-0.945519	NS
CADAVERINE	-0.393541	-0.596867	NS
HISTIDINE	-0.0914615	-0.742903	NS
ADP	0.217927	0.380746	NS
RIBOFLAVIN	-0.741883	0.344237	NS
NAD	-0.163816	-0.289784	NS
SUCCINATE	-0.195679	-0.182527	NS
URIDINE DIPHOSPHATE HEXOSE	0.41457	0.50781	NS
PHENYLALANINE	-0.243154	-0.17939	NS
4-GUANIDINOBUTANOATE	-0.220556	-0.405446	NS
ASPARAGINE	-0.00601768	0.462565	NS
METHIONINE	0.175318	-0.294159	NS
GLUTAMINE	0.00636912	0.472086	NS
BIOTIN	-0.20522	-0.404518	NS
PHOSPHOENOLPYRUVATE	0.195217	0.357231	NS
SERINE	-0.0295566	0.332895	NS
DEOXYCARNITINE	-0.163359	-0.439354	NS
CYSTATHIONINE	-0.157439	-0.548575	NS
BETA-ALANINE/SARCOSINE	-0.0528105	0.451305	NS
N-METHYLASPARTATE	0.0151165	0.361793	NS
KYNURENATE	-0.496711	-0.712289	NS
DECANOYLCARNITINE	0.0629674	0.966366	NS
TRYPTOPHAN	-0.0908712	-0.561949	NS
GLUTAMATE	-0.205115	0.0998873	NS
ALANINE	-0.286291	-0.0414454	NS
STEAROYLCARNITINE	0.168857	-0.157736	NS
PALMITOYLCARNITINE	0.101096	-0.314458	NS
URACIL	0.194046	0.485016	NS
CHOLINE	-0.274562	0.208688	NS
CREATINE	0.413406	0.543259	NS
NADP	0.00358042	-0.297884	NS
FRUCTOSE 6-PHOSPHATE	-0.33565	-0.0208765	NS
RIBOSE 5-PHOSPHATE	0.200468	0.184136	NS
THIAMINE	-0.370417	0.165413	NS
N-ALPHA-ACETYLLYSINE	-0.089054	-0.225019	NS
ISOVALERYLCARNITINE	0.264861	0.909152	NS
OCTANOYLCARNITINE	0.0528611	0.860294	NS
GUANOSINE DIPHOSPHATE MANNOSE	0.197236	-0.0127777	NS
SALSOLINOL	0.4202	-0.513655	NS
ADENOSINE	-0.116786	-0.312345	NS
BUTYRYLCARNITINE	0.134445	-0.0493483	NS
NAADP	-0.1139	-0.281702	NS
PUTRESCINE	-0.184636	0.104076	NS
GLUCOSE 6-PHOSPHATE	-0.412635	-0.089667	NS
MYRISTOYLCARNITINE	0.192832	0.184571	NS
LYSINE	-0.0541894	-0.915917	NS
CYTIDINE	-0.157067	0.183637	NS
ASPARTATE	-0.00227622	0.297124	NS
ARGININE	-0.0984079	0.094875	NS
HYPOXANTHINE	-0.0998622	-1.20886	NS
INOSINE	-0.150693	-0.0801216	NS
ALPHA-KETOGLUTARATE	-0.248723	0.107502	NS
HEXANOYLCARNITINE	0.210137	0.637149	NS
KYNURENINE	0.0739736	-1.72282	NS
CITRULLINE	0.0463261	0.319304	NS
LAUROYLCARNITINE	0.0330248	0.686971	NS
4-HYDROXY-PROLINE	0.646648	0.373554	NS
PROPIOYLCARNITINE	0.191265	0.265349	NS
N,N,N-TRIMETHYLLYSINE	0.485822	-0.161814	NS
TAURINE	-0.311392	0.0762379	NS
CITICOLINE	0.0964283	0.0620898	NS
MALATE	-0.177691	-0.142305	NS
HYDROXYKYNURENINE	-0.0759656	-0.922925	NS
CITRATE	-0.36948	-0.138666	NS
GLYCINE	-0.0593614	0.106135	NS
URIDINE DIPHOSPHATE-N-ACETYLHEXOSAMINE	0.0341489	-0.12313	NS
ACETYLCARNITINE	-0.0311198	0.0533528	NS
TYROSINE	-0.025296	-0.125586	NS
CARNITINE	-0.0132282	-0.0916318	NS
PROLINE	-0.10909	0.00866762	NS
ISOCITRATE	-0.0650035	-0.136932	NS
HISTAMINE	0.0517386	-0.0201336	NS
URATE	0.636884	-0.179782	NS
CDP-ETHANOLAMINE	0.0469485	0.0704141	NS
UREIDOPROPIONATE	-0.057404	0.0802734	NS

## Sheet: (C) Metab. Diet Lar v Ad
Metabolite	log2FC_Diet_Larvae	log2FC_Diet_Adults	Category
CDP-ETHANOLAMINE	-0.218362	-0.59548	q<0.1
CITICOLINE	-0.364192	-0.69769	q<0.1
NAD	0.559184	-0.35128	q<0.1
GLYCERATE	1.50589	0.940373	q<0.1
ISOVALERYLCARNITINE	-1.17964	0.512017	q<0.1
2-/3-PHOSPHOGLYCERATE	0.928664	0.585316	q<0.1
ASPARTATE	1.15473	0.70543	q<0.1
HISTAMINE	0.609997	0.254831	q<0.1
STEAROYLCARNITINE	0.307759	-0.28446	q<0.1
PALMITOYLCARNITINE	0.272012	-0.36863	q<0.1
PANTOTHENATE	0.736513	-0.39806	q<0.1
NICOTINATE	0.806951	-0.48493	q<0.1
AGMATINE	-0.770501	0.346216	q<0.1
ALPHA-KETOGLUTARATE	-0.664372	-0.22185	q<0.1
GAMMA-AMINOBUTYRATE (GABA)	0.739689	0.284315	q<0.1
HISTIDINOL	-0.82297	0.42269	q<0.1
LYSINE	0.232047	0.40859	q<0.1
N-ACETYLASPARTATE	0.511168	0.226244	q<0.1
PROLINE	0.0652857	-0.21828	q<0.1
URIDINE DIPHOSPHATE HEXOSE	-0.409019	0.568653	q<0.1
UREIDOPROPIONATE	0.340553	0.518816	q<0.1
URIDINE	-0.133049	-0.44367	q<0.1
NAADP	0.21634	-0.20382	q<0.1
CITRATE	0.888414	0.362786	q<0.1
MALATE	0.386419	0.248968	q<0.1
GLUCOSE 6-PHOSPHATE	-0.333293	-0.2455	q<0.1
FRUCTOSE 6-PHOSPHATE	-0.428257	-0.15351	q<0.1
CARNITINE	0.404864	-0.13356	q<0.1
NICOTINAMIDE	0.670177	-0.18028	q<0.1
TAURINE	0.703379	0.213777	q<0.1
ETHANOLAMINE	0.182424	-0.35515	q<0.1
SERINE	0.165235	0.110243	q<0.1
DECANOYLCARNITINE	0.756301	0.459834	q<0.1
NADP	0.18666	-0.16995	q<0.1
OCTANOYLCARNITINE	-0.498837	0.645566	q<0.1
CADAVERINE	-0.408843	0.415845	NS
PHENYLALANINE	-0.143435	-0.13803	NS
PROPIOYLCARNITINE	-1.93052	0.339154	NS
CITRULLINE	0.202077	0.471375	NS
ISOCITRATE	0.563979	0.309434	NS
RIBOSE 5-PHOSPHATE	-0.174456	-0.45458	NS
PHOSPHOENOLPYRUVATE	0.975187	0.502075	NS
GLUTAMATE	0.143017	-0.14664	NS
ISOLEUCINE	-0.116159	-0.17198	NS
HEXANOYLCARNITINE	-0.410821	0.412369	NS
N,N,N-TRIMETHYLLYSINE	-0.163066	0.336065	NS
VALINE	-0.177922	-0.09436	NS
GLYCEROL 3-PHOSPHATE	-0.139685	-0.24598	NS
ACETYLCARNITINE	-0.667591	-0.04716	NS
METHIONINE	-0.118184	-0.09812	NS
LACTATE	0.0406298	-0.49184	NS
URACIL	-0.211228	-0.24101	NS
BUTYRYLCARNITINE	-1.61562	0.097747	NS
TYROSINE	-0.526667	0.181902	NS
THREONINE	-0.430969	0.097125	NS
CHOLINE	0.452157	0.099653	NS
4-HYDROXY-PROLINE	1.06406	0.256361	NS
ASPARAGINE	0.122487	0.101959	NS
INOSINE	-0.083896	-0.4814	NS
HYDROXYKYNURENINE	0.243166	-0.54312	NS
KYNURENINE	-0.240232	-1.19268	NS
MYRISTOYLCARNITINE	-0.0944695	-0.33694	NS
CREATINE	0.251785	0.224521	NS
GUANINE	0.272391	0.241832	NS
SALSOLINOL	-0.846925	0.331091	NS
GLUTAMINE	0.0583039	0.094684	NS
BETA-ALANINE/SARCOSINE	0.271818	-0.10367	NS
N-METHYLASPARTATE	0.0601051	0.096593	NS
ADENOSINE	0.1841	0.092931	NS
FAD	0.354387	-0.05428	NS
URATE	-0.366158	0.176281	NS
METHYLTHIOADENOSINE	-0.0439589	-0.30252	NS
ALANINE	0.0280846	-0.58065	NS
THIAMINE	0.0952525	-0.09988	NS
ARGININE	0.110568	-0.0283	NS
GLYCINE	0.0916184	0.024825	NS
LEUCINE	-0.0198848	-0.08599	NS
HISTIDINE	0.147497	-0.06115	NS
DEOXYGUANOSINE	0.269309	0.109197	NS
BIOTIN	1.14876	0.063632	NS
CYTIDINE	0.035419	-0.12581	NS
N-ACETYLGLUTAMATE	0.615982	-0.02705	NS
HYPOXANTHINE	-0.462604	0.059793	NS
LAUROYLCARNITINE	-0.537437	0.039116	NS
CYSTATHIONINE	-0.0718911	0.027004	NS
N-ALPHA-ACETYLLYSINE	-0.0212988	0.419581	NS
SUCCINATE	0.0126427	-0.51366	NS
TRYPTOPHAN	-0.050462	-0.01647	NS
ADP	0.137246	-0.01166	NS
KYNURENATE	0.0137188	0.163141	NS
GUANOSINE	-0.372792	-0.01805	NS
DEOXYCARNITINE	0.0142741	0.476647	NS
PUTRESCINE	-0.0103499	0.097881	NS
URIDINE DIPHOSPHATE-N-ACETYLHEXOSAMINE	-0.19058	-0.00999	NS
GUANOSINE DIPHOSPHATE MANNOSE	-0.00330918	-0.23879	NS
4-GUANIDINOBUTANOATE	-0.00188739	0.500732	NS
RIBOFLAVIN	3.33233	-0.45856	NS
