# Supplementary material for: Evolutionary adaptation to juvenile malnutrition impacts adult metabolism and impairs adult fitness in Drosophila
Source: eLife. 2023 Oct 17;12:e92465. doi: 10.7554/eLife.92465 (PMC10637773; doi:10.7554/eLife.92465)
Supplement: Supplementary file 1. [file elife-92465-supp1.xlsx]

## Sheet: Legend
Supplementary file 1
Results of univariate analysis of gene expression in adult female carcass performed in limma-voom. MeanExpression: average log2 normalized expression across all samples Log2FC_...: log2 fold change estimates corresponding to the effect of regime (Selected - Control), larval diet (poor - standard) and their interaction (SEL_poor - SEL_standard - CTL_poor + CTL_standard). P_...: raw P-values q_...:…

## Sheet: Female carcass RNAseq
FBgn	GeneSymbol	MeanExpression	Log2FC_Regime	Log2FC_Diet	log2FC_RegxDiet	P_Regime	P_Diet	P_RegimexDiet	q_Regime	q_Diet	q_RegimexDiet
FBgn0000008	a	4.306	0.397615	0.0975591	-0.160144	0.0243284	0.439346	0.209392	0.237278	0.375357	0.999544
FBgn0000014	abd-A	5.25355	0.0452651	0.347204	0.0258215	0.638374	7.11e-05	0.721332	0.655744	0.00640241	0.999544
FBgn0000015	Abd-B	2.23944	0.114724	0.418426	-0.0313658	0.449515	0.00118783	0.783406	0.600533	0.0291584	0.999544
FBgn0000017	Abl	5.79528	-0.521252	0.0483687	-0.0233529	0.032473	0.781163	0.893231	0.26125	0.497294	0.999544
FBgn0000018	abo	3.65359	-0.00312662	0.0255141	-0.0219853	0.96128	0.599818	0.650937	0.735525	0.438609	0.999544
FBgn0000024	Ace	3.88212	0.893867	0.739145	0.0330869	0.00119335	0.000502303	0.857327	0.0571805	0.0184955	0.999544
FBgn0000032	Acph-1	4.67903	0.189787	-0.130462	0.00402054	0.211657	0.252488	0.971445	0.509015	0.289706	0.999544
FBgn0000038	nAChRbeta1	0.160133	0.0762291	0.226432	-0.524507	0.902327	0.632101	0.272749	0.727422	0.449163	0.999544
FBgn0000042	Act5C	10.2219	-0.12881	0.0711813	0.0428227	0.417211	0.549935	0.718396	0.590248	0.420771	0.999544
FBgn0000043	Act42A	5.71055	0.275092	-0.183358	-0.108238	0.451423	0.504143	0.692382	0.600597	0.40315	0.999544
FBgn0000044	Act57B	10.7928	0.0536083	-0.0747181	0.0643834	0.696806	0.4723	0.535086	0.676921	0.388751	0.999544
FBgn0000045	Act79B	6.7259	0.121288	0.0587512	0.223611	0.538848	0.691657	0.140217	0.627944	0.469545	0.999544
FBgn0000046	Act87E	8.54298	-0.0104634	-0.0197704	0.0675898	0.946434	0.866058	0.565526	0.733741	0.522907	0.999544
FBgn0000047	Act88F	6.17819	1.00487	0.502049	0.564575	0.00467739	0.0486382	0.0282796	0.118601	0.150855	0.999544
FBgn0000052	Pfas	7.27509	0.374921	0.219828	0.215111	0.00135878	0.00923249	0.0106176	0.0619202	0.0743694	0.999544
FBgn0000053	Gart	7.1588	0.70196	0.00556714	0.0629543	5.8e-05	0.958937	0.561897	0.0140023	0.545806	0.999544
FBgn0000055	Adh	10.6686	0.643838	-0.325544	-0.02385	0.0352319	0.146022	0.913125	0.270978	0.228724	0.999544
FBgn0000056	Adhr	3.76362	0.688826	-0.266247	0.00270837	0.0251634	0.230842	0.990114	0.239594	0.277995	0.999544
FBgn0000057	adp	4.96302	-0.133272	-0.136441	-0.0523833	0.0679909	0.0158788	0.327178	0.356216	0.0975696	0.999544
FBgn0000063	Mps1	0.141632	0.951542	-0.869117	-0.324181	0.324659	0.240401	0.657151	0.558624	0.283949	0.999544
FBgn0000064	Ald1	10.1192	0.0822151	0.0124261	0.0708755	0.532213	0.899729	0.474823	0.625332	0.530426	0.999544
FBgn0000077	amx	3.82177	-0.0202062	-0.00909367	0.088356	0.79374	0.875717	0.138273	0.70362	0.524828	0.999544
FBgn0000078	Amy-d	2.02758	-1.49064	0.250638	-0.0403259	0.0478611	0.645757	0.940906	0.307887	0.45435	0.999544
FBgn0000079	Amy-p	1.80827	-2.69695	0.0102692	0.747845	0.160908	0.994277	0.602564	0.477274	0.554695	0.999544
FBgn0000083	AnxB9	7.86355	-0.266074	0.159055	0.0536988	0.0316722	0.0820416	0.54496	0.260185	0.182497	0.999544
FBgn0000084	AnxB10	6.96061	-0.255803	0.00540329	0.0173683	0.0134583	0.940631	0.810906	0.185417	0.540614	0.999544
FBgn0000092	dyw	0.485067	1.34987	0.0541609	0.253786	0.00120898	0.845599	0.365777	0.0575066	0.516633	0.999544
FBgn0000097	aop	5.49104	0.0124699	0.212561	-0.0485593	0.886171	0.00336246	0.461449	0.724748	0.0496747	0.999544
FBgn0000100	RpLP0	11.1723	0.0381525	-0.124783	0.0636628	0.699083	0.102595	0.394418	0.677617	0.199065	0.999544
FBgn0000108	Appl	3.26627	0.238959	0.333395	0.0180266	0.219724	0.028761	0.900571	0.511014	0.120765	0.999544
FBgn0000109	Aprt	5.07468	0.052324	0.11871	-0.0155516	0.715825	0.278083	0.885516	0.683076	0.303594	0.999544
FBgn0000114	bru1	6.30981	0.562782	-0.173433	-0.100161	0.20228	0.595866	0.758885	0.503239	0.437024	0.999544
FBgn0000115	Arl1	4.74586	-0.0841847	-0.0721778	-0.0234377	0.125725	0.0833638	0.562088	0.452028	0.182941	0.999544
FBgn0000116	Argk	8.42217	-0.226539	-0.116077	0.0332573	0.0341973	0.138572	0.664121	0.267526	0.225945	0.999544
FBgn0000117	arm	7.47734	0.158059	-0.0988915	-0.00436378	0.0672295	0.123761	0.944364	0.355359	0.214439	0.999544
FBgn0000119	arr	4.99806	0.0117635	0.12624	0.062589	0.906459	0.103943	0.409598	0.728091	0.199686	0.999544
FBgn0000139	ash2	5.48596	-0.0858018	-0.174265	-0.0261954	0.303372	0.00934713	0.673148	0.549268	0.0743694	0.999544
FBgn0000140	asp	1.77834	1.59928	-0.724837	-0.0728525	0.343972	0.568528	0.954126	0.564279	0.428084	0.999544
FBgn0000146	aub	3.19643	1.17316	0.0477782	-0.133775	0.22404	0.946719	0.851624	0.513876	0.542048	0.999544
FBgn0000147	aurA	0.445075	1.31989	-0.806085	-0.325465	0.344621	0.446131	0.757075	0.56453	0.378555	0.999544
FBgn0000150	awd	9.10301	0.205436	-0.196829	0.0169574	0.209285	0.113714	0.888497	0.509015	0.20739	0.999544
FBgn0000152	Axs	3.52115	0.21474	0.10023	-0.00429892	0.0125291	0.106244	0.943093	0.179095	0.201778	0.999544
FBgn0000153	b	3.9535	0.110788	-0.0635192	0.00748262	0.61725	0.703085	0.964128	0.649462	0.472979	0.999544
FBgn0000157	Dll	1.67906	0.0177174	0.241801	0.0976524	0.907985	0.0459179	0.402394	0.728598	0.14606	0.999544
FBgn0000158	bam	-0.404052	2.16765	-1.03235	0.380544	0.196314	0.417735	0.763683	0.499725	0.366278	0.999544
FBgn0000163	baz	5.90626	-0.0221786	0.0568234	0.0970963	0.89971	0.668428	0.466021	0.727256	0.461548	0.999544
FBgn0000166	bcd	1.31522	1.04993	-0.98584	-0.253112	0.33968	0.244457	0.76175	0.56363	0.286029	0.999544
FBgn0000173	ben	6.72325	-0.0173757	0.0264376	0.000175353	0.770218	0.555944	0.996871	0.698284	0.423331	0.999544
FBgn0000181	bic	9.76776	0.0167146	-0.0384069	0.0192648	0.791964	0.423565	0.686511	0.703022	0.368547	0.999544
FBgn0000182	BicC	3.19667	1.85951	-0.870643	-0.0959123	0.267958	0.489817	0.939026	0.535964	0.397934	0.999544
FBgn0000183	BicD	5.85263	0.357916	-0.0420167	-0.0736234	0.0193598	0.697965	0.498022	0.213468	0.471429	0.999544
FBgn0000212	brm	5.75345	0.00100805	-0.103381	-0.0326635	0.991862	0.173502	0.661185	0.743704	0.246276	0.999544
FBgn0000221	brn	1.91459	0.148885	-0.284188	-0.0858784	0.381087	0.0338885	0.501696	0.578876	0.129389	0.999544
FBgn0000228	Bsg25D	5.28826	0.138514	0.0107499	-0.068907	0.14291	0.876957	0.326169	0.465334	0.524973	0.999544
FBgn0000229	bsk	4.91026	-0.0250397	0.0650278	-0.0181079	0.763766	0.30492	0.772685	0.696579	0.318104	0.999544
FBgn0000239	bur	7.26063	-0.145371	0.102311	-0.0181284	0.0561057	0.0725663	0.74158	0.327103	0.174715	0.999544
FBgn0000244	by	6.97342	-0.253604	0.145442	0.0114587	0.0313333	0.0937075	0.891538	0.259882	0.192884	0.999544
FBgn0000246	c(3)G	2.78664	0.997171	0.122841	-0.0578086	0.145119	0.807377	0.908605	0.466295	0.505109	0.999544
FBgn0000247	ca	5.75128	-0.00207049	-0.0632907	-0.0251327	0.980154	0.317724	0.688734	0.740341	0.324426	0.999544
FBgn0000250	cact	7.23884	-0.0895835	0.00990451	0.0271453	0.182045	0.841459	0.584651	0.489402	0.515775	0.999544
FBgn0000251	cad	2.78464	1.36405	-0.869023	-0.662539	0.143222	0.215073	0.34104	0.465334	0.26843	0.999544
FBgn0000253	Cam	8.30817	0.206965	-0.0110317	-0.108809	0.0740527	0.895583	0.203711	0.368601	0.529486	0.999544
FBgn0000256	capu	5.42261	-0.242109	-0.22729	-0.0237331	0.117807	0.0544554	0.834094	0.442392	0.157066	0.999544
FBgn0000257	car	4.19599	0.0511047	-0.132507	0.00497934	0.406857	0.00797373	0.913823	0.587652	0.0695792	0.999544
FBgn0000259	CkIIbeta	6.40012	0.115739	-0.00232518	-0.0688999	0.241118	0.974638	0.350946	0.524753	0.550319	0.999544
FBgn0000261	Cat	10.6582	0.031353	0.102675	0.0545403	0.83148	0.358731	0.623511	0.709493	0.341544	0.999544
FBgn0000273	Pka-C1	6.30328	0.051498	0.120526	0.00305272	0.389505	0.0121189	0.945497	0.582297	0.084388	0.999544
FBgn0000283	Cp190	6.25374	0.101452	-0.0586891	-0.0313955	0.32648	0.448609	0.683832	0.55914	0.379931	0.999544
FBgn0000286	Cf2	5.78358	-0.160965	-0.0445422	-0.0670078	0.222803	0.649145	0.494987	0.512962	0.455056	0.999544
FBgn0000287	salr	0.918126	0.29513	0.603758	0.0146255	0.16711	0.000872838	0.926762	0.482992	0.0254033	0.999544
FBgn0000289	cg	6.42858	0.0403173	-0.0126007	-0.0683745	0.698436	0.871974	0.385811	0.677611	0.523747	0.999544
FBgn0000299	Col4a1	10.3005	-0.112278	0.147428	0.029834	0.377546	0.130188	0.753489	0.577285	0.220106	0.999544
FBgn0000307	chif	5.46417	-0.024339	0.0112797	-0.0369925	0.813937	0.884701	0.63516	0.707399	0.526511	0.999544
FBgn0000308	chic	7.85785	-0.0179153	0.00281325	-0.0750298	0.811127	0.960199	0.191797	0.706214	0.546036	0.999544
FBgn0000316	cin	5.38008	-0.0174765	-0.0813326	-0.0150589	0.794815	0.117553	0.765898	0.70381	0.210255	0.999544
FBgn0000317	ck	5.67013	0.100997	-0.0526197	-0.00710255	0.158482	0.323217	0.892765	0.476159	0.326408	0.999544
FBgn0000318	cl	5.62067	0.00904803	-0.123393	0.0118139	0.877484	0.00972547	0.78919	0.722941	0.0747334	0.999544
FBgn0000319	Chc	9.00071	-0.191857	0.132879	-0.0285047	0.010232	0.016907	0.585303	0.164597	0.0995053	0.999544
FBgn0000320	eya	1.64373	1.58672	0.423043	-0.322621	0.115995	0.575186	0.668627	0.440938	0.430236	0.999544
FBgn0000326	clt	5.1914	0.00948356	-0.0404943	0.0133767	0.916136	0.551686	0.843566	0.729756	0.421231	0.999544
FBgn0000330	cm	4.02717	0.0768011	-0.0355938	-0.0683549	0.162498	0.383233	0.101449	0.47833	0.352939	0.999544
FBgn0000339	cni	5.63406	0.0505971	-0.0741799	-0.00753994	0.485731	0.180854	0.88961	0.612312	0.251365	0.999544
FBgn0000346	comt	2.35723	0.550468	0.0161096	-0.205578	0.0486134	0.936216	0.312731	0.309657	0.539722	0.999544
FBgn0000351	cort	0.391375	1.49721	-0.994593	-0.487656	0.275757	0.342399	0.63896	0.537512	0.334783	0.999544
FBgn0000352	cos	3.74824	0.174455	-0.26811	-0.0751912	0.457002	0.136361	0.66895	0.602251	0.223966	0.999544
FBgn0000355	Cp15	-0.535565	-2.79745	-1.10886	-0.86422	0.0234735	0.233234	0.349832	0.233829	0.279874	0.999544
FBgn0000370	crc	9.92909	-0.108623	0.0288499	0.0351621	0.275893	0.697143	0.635546	0.537512	0.471227	0.999544
FBgn0000376	crm	4.02202	0.234945	-0.278262	-0.034984	0.38327	0.175418	0.861934	0.580027	0.247643	0.999544
FBgn0000377	crn	5.10349	0.00476723	-0.056133	0.0195411	0.951028	0.341474	0.738256	0.734386	0.334432	0.999544
FBgn0000382	csw	7.0249	0.0966129	0.139197	-0.00249113	0.369235	0.0929948	0.975228	0.574372	0.192174	0.999544
FBgn0000384	cta	5.10269	0.0868965	-0.07092	-0.0453462	0.464676	0.428229	0.610974	0.604289	0.371018	0.999544
FBgn0000392	cup	3.61668	0.904165	-0.535197	-0.157123	0.280389	0.394092	0.800946	0.538628	0.357292	0.999544
FBgn0000394	cv	4.81619	-0.177866	0.0332169	0.0339331	0.0728835	0.644941	0.637863	0.367856	0.454043	0.999544
FBgn0000395	cv-2	5.10359	-0.0279334	0.156499	-0.100388	0.819044	0.0985659	0.280637	0.708936	0.195199	0.999544
FBgn0000404	CycA	4.84355	1.57846	-0.437793	-0.0503443	0.213438	0.641476	0.957191	0.509015	0.452995	0.999544
FBgn0000405	CycB	5.34183	1.92397	-0.624805	-0.0993877	0.188675	0.564307	0.926666	0.494589	0.426957	0.999544
FBgn0000406	Cyt-b5-r	10.863	0.0196255	0.11026	0.150315	0.910812	0.406566	0.261002	0.729161	0.362478	0.999544
FBgn0000411	D	2.12988	0.097744	0.653698	0.0524939	0.668553	0.000926768	0.762284	0.665924	0.0259474	0.999544
FBgn0000412	D1	5.95154	0.294007	-0.125225	-0.0732853	0.128301	0.380865	0.606006	0.452222	0.351798	0.999544
FBgn0000414	Dab	5.61629	-0.133143	0.061835	0.0469903	0.121507	0.331109	0.45815	0.446843	0.329848	0.999544
FBgn0000416	Sap-r	10.8245	-0.188183	0.0704825	0.0557661	0.0326505	0.26895	0.379307	0.262124	0.300013	0.999544
FBgn0000422	Ddc	4.71299	-0.267557	0.149111	0.0330293	0.0951488	0.210057	0.777625	0.407653	0.266932	0.999544
FBgn0000426	SmF	2.72465	0.434058	-0.320556	-0.12418	0.106013	0.112954	0.529253	0.423276	0.206983	0.999544
FBgn0000427	dec	1.42852	3.23482	-0.696056	-1.14492	0.501665	0.848657	0.753773	0.615983	0.517817	0.999544
FBgn0000447	Dhod	5.26887	0.0849057	-0.0542101	-0.00752997	0.295631	0.373196	0.900686	0.545704	0.348306	0.999544
FBgn0000451	ect	2.43836	0.37087	0.326129	-0.0631543	0.0967822	0.0555532	0.699437	0.411139	0.158022	0.999544
FBgn0000454	Dip-B	6.82268	-0.201568	-0.0157202	-0.0065805	0.145375	0.877148	0.948394	0.466439	0.524973	0.999544
FBgn0000455	Dip-C	5.33304	-0.117109	0.0442255	0.0313638	0.126903	0.434575	0.578177	0.452205	0.373381	0.999544
FBgn0000463	Dl	2.8836	0.637239	-0.174153	-0.0910301	0.208826	0.643153	0.808319	0.50853	0.453522	0.999544
FBgn0000464	Lar	4.32731	0.0890639	0.0596229	-0.079233	0.38292	0.436815	0.303949	0.580027	0.374181	0.999544
FBgn0000473	Cyp6a2	6.37995	-0.659757	-0.0153154	0.0413132	0.119189	0.960575	0.89394	0.443594	0.546185	0.999544
FBgn0000477	DNaseII	5.04229	-0.137074	-0.0550835	0.227141	0.533913	0.738946	0.177781	0.62583	0.484368	0.999544
FBgn0000479	dnc	6.1959	-0.0846685	0.196751	-0.02797	0.48798	0.0402247	0.75974	0.613006	0.138163	0.999544
FBgn0000482	dor	4.11965	-0.0136692	-0.00865206	0.0308208	0.822724	0.850513	0.503992	0.708936	0.518343	0.999544
FBgn0000489	Pka-C3	5.21726	-0.15271	0.134699	0.0419643	0.270651	0.19885	0.683906	0.536901	0.260441	0.999544
FBgn0000490	dpp	5.0513	-0.20849	0.24352	0.0136995	0.123336	0.0208638	0.890048	0.447228	0.108573	0.999544
FBgn0000492	Dr	3.99115	-0.120837	0.158813	0.0744312	0.455591	0.198302	0.540665	0.601674	0.260424	0.999544
FBgn0000499	dsh	4.19547	0.0449107	-0.17633	-0.00931101	0.731282	0.0830646	0.924534	0.686915	0.182777	0.999544
FBgn0000504	dsx	6.18711	0.0149637	0.126718	0.0191798	0.913628	0.229791	0.853453	0.72945	0.277348	0.999544
FBgn0000520	dwg	3.44213	-0.0180178	-0.117972	-0.0635585	0.876382	0.184756	0.468633	0.722637	0.253241	0.999544
FBgn0000524	dx	3.76905	0.246838	-0.396384	-0.101906	0.303292	0.0348602	0.569366	0.549268	0.130737	0.999544
FBgn0000527	e	3.13584	-0.0957111	-0.0169685	-0.0839377	0.724435	0.933761	0.681526	0.685833	0.538934	0.999544
FBgn0000533	ea	3.35573	0.231943	-0.0692033	0.0318993	0.101345	0.50525	0.75783	0.415083	0.403571	0.999544
FBgn0000535	eag	0.914494	-0.0595579	0.408005	0.00437355	0.797733	0.0281238	0.980147	0.704688	0.120394	0.999544
FBgn0000536	eas	7.58406	-0.0405478	0.0668097	-0.129149	0.803739	0.587311	0.298444	0.705035	0.43462	0.999544
FBgn0000541	E(bx)	6.65326	0.11738	-0.0357124	-0.0425262	0.458984	0.763425	0.720148	0.602655	0.491791	0.999544
FBgn0000542	ec	3.01884	0.34176	0.415401	-0.0502337	0.0137372	0.000277195	0.607828	0.186671	0.0129547	0.999544
FBgn0000543	ecd	5.26631	-0.228436	0.0750345	0.0439542	0.0495487	0.37441	0.600704	0.310469	0.348953	0.999544
FBgn0000546	EcR	5.2517	0.00190935	-0.066579	-0.0496435	0.979103	0.23238	0.369803	0.740101	0.279363	0.999544
FBgn0000547	ed	6.39929	0.613528	0.297838	0.0655391	0.00419903	0.0516374	0.655349	0.111687	0.15483	0.999544
FBgn0000557	eEF1alpha2	4.57014	0.177453	-0.0850765	0.0801711	0.346757	0.546471	0.569664	0.565906	0.419547	0.999544
FBgn0000559	eEF2	13.0363	-0.224147	0.0437122	0.0761487	0.0180979	0.515387	0.261708	0.208737	0.407081	0.999544
FBgn0000562	egl	6.1755	-0.0411675	0.0406309	0.0229393	0.579688	0.468666	0.681229	0.638177	0.387202	0.999544
FBgn0000565	MsrA	6.9535	0.236265	-0.133872	0.0594418	0.213315	0.345052	0.672529	0.509015	0.335755	0.999544
FBgn0000566	Eip55E	6.03621	0.186597	-0.031775	-0.0137311	0.0266335	0.59655	0.818595	0.243492	0.43734	0.999544
FBgn0000567	Eip74EF	4.59762	-0.157835	0.381901	0.0267342	0.24864	0.000938073	0.792237	0.527294	0.0260539	0.999544
FBgn0000568	Eip75B	7.01701	-0.0123673	0.248963	0.0135647	0.90583	0.00405946	0.863119	0.727872	0.0533261	0.999544
FBgn0000575	emc	6.50701	0.054543	0.120531	0.0618527	0.620944	0.154748	0.457682	0.650271	0.233309	0.999544
FBgn0000578	ena	4.16897	0.209567	0.0153413	-0.0830347	0.236829	0.906933	0.528687	0.522801	0.532318	0.999544
FBgn0000579	Eno	9.74824	0.196371	-0.0972727	0.0716887	0.0448582	0.17555	0.313575	0.300742	0.24765	0.999544
FBgn0000581	E(Pc)	6.38963	0.0861952	0.0161338	-0.0132419	0.473793	0.857805	0.883076	0.607039	0.520731	0.999544
FBgn0000588	esc	1.80518	0.423147	-0.375959	-0.112054	0.350242	0.2736	0.741104	0.568037	0.301592	0.999544
FBgn0000592	Est-6	6.58417	0.0426604	0.0648785	0.178767	0.822611	0.651042	0.219492	0.708936	0.45521	0.999544
FBgn0000611	exd	6.3972	-0.0800889	0.0606004	-0.0328984	0.300919	0.298285	0.568976	0.548353	0.31462	0.999544
FBgn0000615	exu	3.5639	1.37013	-0.422594	-0.277441	0.175287	0.572	0.710055	0.487972	0.429597	0.999544
FBgn0000617	Taf9	3.28136	-0.00631416	-0.149696	-0.0858363	0.959734	0.121979	0.366523	0.735525	0.214035	0.999544
FBgn0000618	e(y)2	2.48969	0.0687188	-0.174418	0.0441541	0.460887	0.0190526	0.52887	0.602655	0.105351	0.999544
FBgn0000629	E(z)	4.59942	0.169768	-0.134442	0.000390848	0.106797	0.0906199	0.995944	0.424358	0.190021	0.999544
FBgn0000633	tei	0.572257	0.374171	0.583317	0.320065	0.421536	0.106945	0.366585	0.591442	0.202572	0.999544
FBgn0000635	Fas2	5.23175	0.291973	0.0149227	-0.102959	0.0262993	0.873085	0.276744	0.243458	0.523987	0.999544
FBgn0000636	Fas3	4.71009	0.213811	0.327113	0.0371119	0.0193275	3.7e-05	0.566819	0.213468	0.0049967	0.999544
FBgn0000658	fj	2.09112	-0.311905	0.422165	-0.0158149	0.18312	0.0221468	0.927448	0.490874	0.110289	0.999544
FBgn0000659	fkh	3.33417	-0.0880797	0.443998	0.00472611	0.769242	0.0595839	0.983334	0.698193	0.161715	0.999544
FBgn0000662	fl(2)d	5.55556	0.105482	0.030814	-0.067478	0.207589	0.619307	0.281612	0.507794	0.444457	0.999544
FBgn0000667	Actn	7.52579	0.115112	0.205914	0.0871226	0.180336	0.00330403	0.177906	0.487972	0.0492606	0.999544
FBgn0000709	fliI	5.27826	0.0640849	0.0145637	0.00282166	0.496611	0.836549	0.968101	0.615473	0.514238	0.999544
FBgn0000711	flw	4.54567	-0.0271967	0.216243	-0.0397756	0.745568	0.002127	0.52964	0.690976	0.0393119	0.999544
FBgn0000719	fog	5.14619	0.20689	0.236264	0.0427114	0.0113606	0.000371074	0.457119	0.169411	0.0151561	0.999544
FBgn0000721	for	7.79889	-0.158697	0.0991264	-0.0033526	0.180484	0.263261	0.969384	0.487972	0.296469	0.999544
FBgn0000723	FER	4.97862	-0.0881377	0.27805	0.0444587	0.507519	0.009782	0.655983	0.617567	0.0747557	0.999544
FBgn0000810	fs(1)K10	4.57946	0.151914	-0.0776845	-0.0723181	0.350474	0.523545	0.552385	0.568272	0.410625	0.999544
FBgn0000826	png	0.436754	1.26916	-1.19196	-0.125395	0.319202	0.228121	0.897447	0.556334	0.276431	0.999544
FBgn0000927	fs(1)Ya	2.29961	2.05049	-0.642789	-0.228938	0.246382	0.625597	0.861706	0.526568	0.446873	0.999544
FBgn0000964	tj	4.40225	0.431628	-0.589376	-0.107139	0.297174	0.0656137	0.728172	0.546277	0.167179	0.999544
FBgn0000996	dup	3.17229	0.55037	-0.871576	-0.060765	0.430756	0.107893	0.908066	0.594768	0.203168	0.999544
FBgn0001075	ft	2.43495	0.113151	0.536317	0.178633	0.504148	0.000319038	0.170938	0.616608	0.0142262	0.999544
FBgn0001078	ftz-f1	5.265	0.351802	0.0794229	0.00324559	0.0990764	0.610709	0.983354	0.41228	0.44163	0.999544
FBgn0001079	fu	3.81249	0.0291311	-0.124195	-0.00924735	0.737623	0.0675185	0.88753	0.688773	0.169771	0.999544
FBgn0001083	fw	2.40706	0.367003	0.457718	0.0452462	0.192175	0.0370419	0.828491	0.495975	0.13355	0.999544
FBgn0001084	fy	1.54147	-0.00618338	-0.174569	0.127709	0.96878	0.152666	0.290291	0.737083	0.232244	0.999544
FBgn0001085	fz	1.92678	0.738202	-0.37173	-0.0492508	0.259075	0.447768	0.919367	0.531648	0.37955	0.999544
FBgn0001086	fzy	1.15408	1.16098	-1.02057	-0.418169	0.425598	0.361708	0.706394	0.592362	0.342653	0.999544
FBgn0001087	g	5.38953	0.0364066	0.0292389	-0.0516419	0.741412	0.724727	0.535176	0.690821	0.479488	0.999544
FBgn0001089	Gal	3.71107	-0.69464	0.0757834	0.10176	0.0375613	0.751706	0.671236	0.277833	0.488059	0.999544
FBgn0001090	bnb	5.53224	-0.178824	0.252295	0.141893	0.143699	0.00939829	0.124083	0.465334	0.0744674	0.999544
FBgn0001091	Gapdh1	9.56299	0.394208	-0.0091943	0.137753	0.00385348	0.921314	0.148425	0.107992	0.535539	0.999544
FBgn0001092	Gapdh2	9.06622	0.100013	-0.128832	0.0484096	0.253565	0.0570577	0.458799	0.528784	0.159016	0.999544
FBgn0001098	Gdh	7.49224	0.144844	0.0640548	-0.0056	0.223518	0.469501	0.949282	0.513756	0.387498	0.999544
FBgn0001099	gdl	2.68627	0.0524792	-0.0498393	-0.0855067	0.705517	0.634048	0.416401	0.679909	0.450152	0.999544
FBgn0001104	Galphai	5.69865	0.0781851	-0.0589569	-0.0950786	0.571847	0.571023	0.36366	0.635614	0.429364	0.999544
FBgn0001105	Gbeta13F	7.42585	0.018833	0.141062	-0.0524855	0.849507	0.0689135	0.484453	0.714622	0.17168	0.999544
FBgn0001108	DCTN1-p150	6.13397	-0.00769515	0.010106	-0.0477417	0.90553	0.835955	0.332902	0.727872	0.514114	0.999544
FBgn0001112	Gld	1.09209	0.118226	0.412092	0.0850245	0.661194	0.0529259	0.677305	0.663901	0.155685	0.999544
FBgn0001114	Glt	8.24298	0.000273335	-0.297089	-0.0240089	0.998961	0.0700596	0.879196	0.744743	0.172327	0.999544
FBgn0001120	gnu	2.25861	2.04545	-0.890999	0.17748	0.275689	0.531918	0.900482	0.537512	0.413516	0.999544
FBgn0001122	Galphao	5.59423	-0.0168894	0.081536	-0.022151	0.844348	0.215592	0.732416	0.713146	0.268546	0.999544
FBgn0001123	Galphas	5.57155	-0.0936132	0.0494203	0.00614742	0.36759	0.52536	0.936747	0.574279	0.411121	0.999544
FBgn0001124	Got1	7.02906	-0.181601	-0.0577635	0.039264	0.027215	0.328542	0.504127	0.245295	0.328638	0.999544
FBgn0001125	Got2	8.14484	0.207636	0.127186	0.202234	0.153608	0.241781	0.0687717	0.474855	0.284858	0.999544
FBgn0001128	Gpdh1	9.97908	0.494883	-0.207287	0.026389	0.0238842	0.190805	0.865184	0.23511	0.25673	0.999544
FBgn0001133	grau	4.28318	-0.0110431	-0.0843784	0.0174543	0.850538	0.0656481	0.692674	0.714622	0.167179	0.999544
FBgn0001134	Grd	0.442523	0.385577	-0.0416634	-0.307917	0.195368	0.8503	0.171954	0.498483	0.518343	0.999544
FBgn0001137	grk	4.19578	0.113972	0.0783641	-0.0440021	0.272625	0.315121	0.569702	0.537512	0.323078	0.999544
FBgn0001139	gro	5.85473	0.0592061	-0.0496622	-0.0650055	0.631092	0.592675	0.484782	0.653869	0.436104	0.999544
FBgn0001142	Gs1	8.51223	-0.010067	0.214909	0.0789652	0.935561	0.0298431	0.403039	0.731891	0.122819	0.999544
FBgn0001145	Gs2	7.87828	-0.0667443	0.0698001	0.0818436	0.623123	0.495694	0.425295	0.650891	0.399833	0.999544
FBgn0001149	GstD1	7.57901	-0.123923	-0.417706	-0.0528964	0.298286	8.8e-05	0.551879	0.547216	0.0074107	0.999544
FBgn0001168	h	5.94091	-0.116494	0.0944952	0.08329	0.375282	0.33986	0.399122	0.57678	0.334047	0.999544
FBgn0001169	H	4.88412	0.0526645	-0.115488	-0.124003	0.67135	0.223135	0.19197	0.66633	0.27401	0.999544
FBgn0001179	hay	3.63137	0.0970712	-0.173401	-0.065983	0.478206	0.100815	0.521521	0.608289	0.197501	0.999544
FBgn0001180	hb	3.01069	0.409291	-0.4231	-0.0399078	0.200923	0.0844374	0.866297	0.502042	0.183625	0.999544
FBgn0001185	her	4.18235	-0.00401578	0.0540769	-0.0207116	0.955048	0.318617	0.699737	0.735191	0.324782	0.999544
FBgn0001186	Hex-A	7.88543	0.247995	0.244514	0.0858921	0.029477	0.00582908	0.295824	0.254347	0.0620197	0.999544
FBgn0001187	Hex-C	8.06691	0.0198582	-0.0247813	0.160131	0.91699	0.862793	0.270583	0.729929	0.521874	0.999544
FBgn0001189	hfw	6.47996	-0.164383	0.0677042	0.064233	0.126029	0.393594	0.417917	0.452028	0.357194	0.999544
FBgn0001197	His2Av	5.68027	0.329059	-0.26267	-0.140718	0.360999	0.333084	0.601331	0.572908	0.331118	0.999544
FBgn0001202	hook	4.74051	0.0398589	0.0234459	-0.0338827	0.594648	0.677053	0.548104	0.643411	0.464731	0.999544
FBgn0001206	Hmr	2.99627	0.0985562	-0.285896	-0.0798139	0.679772	0.121434	0.657447	0.670975	0.213848	0.999544
FBgn0001208	Hn	8.6153	-0.395559	0.113743	0.0902651	0.0361171	0.403243	0.505885	0.273674	0.360878	0.999544
FBgn0001215	Hrb98DE	6.67141	0.16376	-0.200512	-0.0927034	0.144135	0.0219252	0.266888	0.465334	0.110064	0.999544
FBgn0001216	Hsc70-1	4.11456	0.161818	0.0593998	0.154789	0.385923	0.670378	0.272955	0.581152	0.462172	0.999544
FBgn0001217	Hsc70-2	3.7741	0.281365	0.241067	0.0765887	0.178297	0.127836	0.620307	0.487972	0.217904	0.999544
FBgn0001218	Hsc70-3	8.87375	-0.305299	-0.213829	-0.115189	0.0148898	0.0222772	0.199258	0.192521	0.110453	0.999544
FBgn0001220	Hsc70-5	8.13635	-0.068845	-0.0170241	0.0123332	0.402211	0.781579	0.84074	0.58728	0.497323	0.999544
FBgn0001222	Hsf	5.67605	-0.0347893	-0.129697	-0.0659414	0.666487	0.0413975	0.282946	0.665924	0.139304	0.999544
FBgn0001223	Hsp22	2.90867	0.1414	-0.25127	0.00531087	0.665994	0.313441	0.982804	0.665924	0.322256	0.999544
FBgn0001225	Hsp26	4.5367	0.347233	-1.12599	-0.438817	0.663913	0.071208	0.467878	0.665184	0.17331	0.999544
FBgn0001226	Hsp27	2.6688	1.37727	-1.42337	-0.443173	0.358269	0.221694	0.699145	0.57226	0.27293	0.999544
FBgn0001230	Hsp68	2.86162	-0.342056	-0.465351	-0.137949	0.100438	0.00537594	0.370675	0.412307	0.0601963	0.999544
FBgn0001233	Hsp83	10.6474	0.0550156	-0.177285	0.0272001	0.712202	0.123593	0.808311	0.681715	0.214439	0.999544
FBgn0001235	hth	4.68537	0.0906226	0.322104	-0.0694421	0.541122	0.00763583	0.53382	0.627944	0.0681898	0.999544
FBgn0001247	Ide	6.02383	0.0477777	0.0202302	0.0218327	0.289602	0.547754	0.516785	0.544335	0.41999	0.999544
FBgn0001248	Idh	9.35986	0.0514613	-0.0367362	0.015872	0.667176	0.683228	0.859842	0.665924	0.46735	0.999544
FBgn0001250	if	6.63678	-0.115241	0.00443383	0.0382093	0.448231	0.968866	0.736923	0.600273	0.548142	0.999544
FBgn0001253	ImpE1	0.677122	3.54353	0.321021	-0.133911	9.86e-05	0.577343	0.815654	0.0178517	0.430685	0.999544
FBgn0001257	ImpL2	9.26988	0.11416	0.32417	0.156799	0.50377	0.0175385	0.227669	0.616608	0.10124	0.999544
FBgn0001258	Ldh	4.79211	-0.188616	0.00473141	0.117778	0.137649	0.95952	0.214448	0.462134	0.545905	0.999544
FBgn0001259	in	1.3043	-0.00221379	0.285663	0.203405	0.991702	0.086428	0.214697	0.743704	0.185628	0.999544
FBgn0001276	ix	2.59894	-0.0434758	-0.201097	-0.0431869	0.662294	0.0124824	0.565474	0.664156	0.0854616	0.999544
FBgn0001280	janA	4.14285	0.147473	-0.206122	0.0286052	0.250589	0.0391821	0.763953	0.5279	0.136439	0.999544
FBgn0001291	Jra	5.09994	-0.112994	0.0404578	-0.0166854	0.315961	0.630223	0.842281	0.554683	0.448464	0.999544
FBgn0001296	kar	6.94853	0.352582	0.174807	0.0919856	0.0141934	0.0934152	0.366335	0.188375	0.192734	0.999544
FBgn0001297	kay	7.14893	-0.0425253	0.154709	-0.0145942	0.705177	0.0771354	0.862825	0.679683	0.178141	0.999544
FBgn0001301	kel	5.88926	0.233603	0.0956127	0.0125963	0.114094	0.380632	0.907255	0.437397	0.351798	0.999544
FBgn0001308	Khc	7.34692	-0.108346	0.0869966	-0.0319184	0.142311	0.118618	0.557545	0.465334	0.211066	0.999544
FBgn0001311	kkv	3.05274	0.910895	0.974802	0.223626	0.0015289	4.18e-05	0.256668	0.0651189	0.00508061	0.999544
FBgn0001316	klar	6.8507	0.346061	0.225513	-0.078647	0.0569599	0.095915	0.550497	0.330528	0.19387	0.999544
FBgn0001319	kn	1.22109	-0.131451	0.408298	-0.0705635	0.575157	0.0289837	0.690571	0.636937	0.121113	0.999544
FBgn0001320	kni	2.55469	-0.0979527	0.175593	-0.0122675	0.592101	0.209145	0.928818	0.642471	0.266221	0.999544
FBgn0001321	knk	1.75539	0.405043	0.650267	0.226098	0.0573875	0.000342008	0.156302	0.330947	0.0147106	0.999544
FBgn0001323	knrl	2.7432	-0.027826	0.381635	0.0245349	0.853256	0.00252587	0.828971	0.714875	0.0423338	0.999544
FBgn0001324	kto	5.08306	-0.041652	0.0754187	0.0151901	0.529851	0.138634	0.75996	0.624378	0.225962	0.999544
FBgn0001330	kz	4.25376	-0.063653	-0.12413	-0.0394028	0.660901	0.261458	0.718029	0.663847	0.295541	0.999544
FBgn0001341	Mybbp1A	4.17789	0.16735	0.165398	-0.0861218	0.57229	0.459555	0.698873	0.635868	0.383696	0.999544
FBgn0001404	egh	5.90169	0.0106389	-0.0294743	-0.123068	0.917128	0.702077	0.119701	0.729929	0.472499	0.999544
FBgn0001491	l(1)10Bb	4.44624	-0.0144701	-0.0477388	-0.0302917	0.826409	0.341021	0.543264	0.708936	0.334384	0.999544
FBgn0001565	Hlc	7.11407	-0.0811708	0.00815483	0.0369285	0.440892	0.917498	0.639807	0.597584	0.534873	0.999544
FBgn0001612	Grip91	3.77979	0.302366	-0.24167	-0.0605791	0.206377	0.180714	0.732329	0.505971	0.251365	0.999544
FBgn0001624	dlg1	6.65056	0.130212	0.153758	-0.0215401	0.16005	0.0324411	0.752336	0.476462	0.127436	0.999544
FBgn0001941	ifc	5.25181	0.128742	-0.100642	-0.096521	0.393854	0.37601	0.395536	0.583577	0.349706	0.999544
FBgn0001942	eIF4A	11.483	-0.0673671	0.0347479	0.0764311	0.451098	0.604215	0.259669	0.600533	0.439697	0.999544
FBgn0001961	Arpc1	6.21235	-0.195621	-0.00937855	0.0169662	0.067303	0.903584	0.826607	0.355359	0.531501	0.999544
FBgn0001965	Sos	4.72943	0.0320509	-0.111061	-0.0868199	0.778996	0.204143	0.317465	0.699791	0.263679	0.999544
FBgn0001970	Pgant35A	3.11241	0.194722	-0.326113	0.00197434	0.153342	0.00333366	0.984315	0.47471	0.0493993	0.999544
FBgn0001977	CIAPIN1	5.36639	-0.0463872	0.0330819	0.00386505	0.62704	0.645041	0.956976	0.65253	0.454043	0.999544
FBgn0001978	stc	6.07387	-0.0166665	-0.0310495	-0.0499037	0.889465	0.731058	0.58145	0.725388	0.481664	0.999544
FBgn0001986	Mtr4	4.99596	0.139047	-0.0906868	0.00741209	0.256195	0.323296	0.934945	0.53034	0.326408	0.999544
FBgn0001987	Gli	4.08257	0.104588	0.198415	0.0364071	0.393312	0.0389071	0.691108	0.583563	0.135851	0.999544
FBgn0001989	ND-B17	5.94805	0.187274	-0.127989	0.0364541	0.0470275	0.0691497	0.591996	0.305747	0.171762	0.999544
FBgn0001990	wek	4.27503	-0.121301	-0.0160691	-0.0341205	0.132309	0.785864	0.565157	0.456278	0.497878	0.999544
FBgn0001991	Ca-alpha1D	4.50916	0.107468	0.0732763	-0.0785141	0.538333	0.576851	0.55013	0.627902	0.430615	0.999544
FBgn0001994	crp	6.36235	0.0392653	0.0959142	0.00721139	0.637817	0.135326	0.908307	0.655744	0.223039	0.999544
FBgn0001995	mRpL4	4.36239	-0.0103512	-0.10289	0.0214451	0.912265	0.154947	0.761836	0.72945	0.233309	0.999544
FBgn0002021	l(2)37Bb	4.86217	0.0676427	0.000477088	0.0591333	0.375717	0.993316	0.304899	0.576922	0.554616	0.999544
FBgn0002022	Catsup	5.80941	-0.013345	-0.0299501	0.0598646	0.866798	0.617765	0.322579	0.719285	0.44404	0.999544
FBgn0002023	Lim3	0.990944	-0.610399	-0.23725	0.0883518	0.0280109	0.239161	0.656796	0.249024	0.283247	0.999544
FBgn0002031	l(2)37Cc	7.09476	0.00650615	-0.077797	0.0134772	0.942605	0.259456	0.842949	0.732986	0.294229	0.999544
FBgn0002036	CG10561	4.1611	-0.0114685	-0.0114271	0.0242371	0.900817	0.868954	0.726668	0.727302	0.523356	0.999544
FBgn0002044	swm	6.14067	0.0154038	0.00602656	-0.0333885	0.781919	0.885481	0.428111	0.700114	0.526529	0.999544
FBgn0002069	AspRS	6.72778	-0.195119	-0.0259678	-0.0328463	0.0150988	0.646084	0.561904	0.193495	0.454406	0.999544
FBgn0002121	l(2)gl	7.19994	-0.0940109	0.0767886	0.0391584	0.404385	0.366068	0.642576	0.587652	0.344814	0.999544
FBgn0002174	CG5504	5.55115	-0.0563978	-0.14628	0.00883383	0.460591	0.0166419	0.877203	0.602655	0.0993693	0.999544
FBgn0002183	dre4	5.68062	0.343475	-0.147005	-0.0627731	0.191081	0.451185	0.746369	0.49514	0.38072	0.999544
FBgn0002283	l(3)73Ah	3.80605	0.255734	-0.172474	-0.058549	0.127331	0.169732	0.634749	0.452205	0.244033	0.999544
FBgn0002284	Prosbeta6	7.73377	-0.0614249	-0.097613	-0.0268503	0.554159	0.217685	0.730429	0.632436	0.269908	0.999544
FBgn0002306	sas	4.52904	0.230962	0.469158	0.176449	0.131679	0.000338829	0.12627	0.455251	0.014704	0.999544
FBgn0002354	l(3)87Df	3.08008	-0.155932	0.0311534	-0.029986	0.0851698	0.637384	0.649987	0.389615	0.451316	0.999544
FBgn0002413	dco	6.40416	0.0210167	-0.0381329	-0.0929748	0.849974	0.648952	0.272495	0.714622	0.455056	0.999544
FBgn0002431	hyd	7.81634	-0.0937434	0.0673509	0.00447778	0.0865076	0.100726	0.910399	0.391991	0.197488	0.999544
FBgn0002441	l(3)mbt	4.8767	0.135885	-0.290048	-0.0179242	0.186319	0.000811327	0.813285	0.492559	0.02475	0.999544
FBgn0002466	sti	1.37541	1.07765	-0.404385	-0.0585017	0.313125	0.612648	0.941444	0.553786	0.442164	0.999544
FBgn0002521	pho	5.07268	0.0838061	-0.10434	-0.0445979	0.468191	0.234756	0.606849	0.604842	0.28076	0.999544
FBgn0002524	lace	5.53289	-0.0320919	0.0821432	-0.00147807	0.821344	0.445146	0.988965	0.708936	0.378251	0.999544
FBgn0002525	Lam	5.57057	0.300174	0.0239385	-0.106114	0.162585	0.879735	0.504464	0.47833	0.525552	0.999544
FBgn0002526	LanA	6.88972	0.0137748	0.168689	-0.0460265	0.924449	0.132577	0.674265	0.730545	0.221594	0.999544
FBgn0002534	Lcp3	3.82554	1.59603	0.476493	-0.133324	0.000691325	0.134011	0.667689	0.043674	0.222152	0.999544
FBgn0002542	lds	3.36188	0.582082	-0.410208	-0.108525	0.430402	0.460507	0.844302	0.594604	0.383854	0.999544
FBgn0002543	robo2	5.22931	-0.291906	0.214897	-0.0916775	0.094473	0.101369	0.473644	0.406514	0.198112	0.999544
FBgn0002552	lin	4.4412	0.183357	-0.205106	0.0176705	0.0961832	0.0168852	0.826015	0.410019	0.0995053	0.999544
FBgn0002563	Lsp1beta	0.579271	-0.949833	0.0764146	0.300064	0.0741713	0.843696	0.441671	0.368601	0.516268	0.999544
FBgn0002565	Lsp2	1.32545	0.253399	-0.243512	0.502736	0.592318	0.500123	0.170811	0.642471	0.401414	0.999544
FBgn0002566	lt	5.99392	-0.0467917	0.00817369	-0.00259003	0.483115	0.869988	0.958626	0.610955	0.523609	0.999544
FBgn0002567	Rab32	5.22619	0.509486	-0.254437	-0.0381179	0.000689174	0.015815	0.69938	0.043674	0.0973188	0.999544
FBgn0002569	Mal-A2	0.0165406	-0.866052	-0.211477	1.81603	0.465541	0.822489	0.0638916	0.604408	0.510489	0.999544
FBgn0002570	Mal-A1	3.92721	-1.25526	-0.00248574	1.10014	0.342046	0.997996	0.273035	0.56363	0.555356	0.999544
FBgn0002573	sens	1.62435	0.0530778	0.470971	0.177433	0.835596	0.0223087	0.364912	0.710957	0.110453	0.999544
FBgn0002578	Kaz-m1	1.02104	-0.0626439	-0.845583	2.00288	0.955258	0.367092	0.0400071	0.735191	0.345512	0.999544
FBgn0002579	RpL36	10.5435	0.0237399	-0.0279145	0.0795342	0.777429	0.659101	0.215771	0.699587	0.45784	0.999544
FBgn0002590	RpS5a	10.6763	-0.124179	-0.0402609	0.101639	0.248655	0.614796	0.210755	0.527294	0.442953	0.999544
FBgn0002593	RpLP1	11.3444	-0.0392924	-0.0505432	0.0807572	0.689304	0.4958	0.28033	0.674661	0.399833	0.999544
FBgn0002609	E(spl)m3-HLH	1.25598	0.71716	0.035911	0.0369778	0.144149	0.920807	0.918463	0.465334	0.535539	0.999544
FBgn0002622	RpS3	10.9108	-0.0124005	-0.0530487	0.0748427	0.885077	0.414651	0.25326	0.724647	0.365067	0.999544
FBgn0002626	RpL32	10.387	0.0495268	-0.103482	0.092553	0.579055	0.132013	0.175759	0.637946	0.221183	0.999544
FBgn0002638	Rcc1	5.5135	0.595367	-0.187365	-0.0765596	0.149316	0.538548	0.800882	0.471201	0.41593	0.999544
FBgn0002641	mal	4.01619	-0.182918	-0.129495	-0.098573	0.0302563	0.0403852	0.111614	0.256395	0.138163	0.999544
FBgn0002643	mam	5.32752	0.118427	0.0576989	-0.0814972	0.369365	0.558997	0.410963	0.574372	0.424456	0.999544
FBgn0002645	Map205	8.10465	-0.0740291	0.0942482	0.126349	0.423663	0.181525	0.0777544	0.591687	0.251722	0.999544
FBgn0002673	twe	1.24261	0.860606	-1.55507	-0.0912	0.43546	0.0833988	0.916307	0.596553	0.182941	0.999544
FBgn0002707	mei-9	2.82835	0.427017	-0.252633	-0.0890547	0.0850419	0.170896	0.622852	0.389615	0.244805	0.999544
FBgn0002709	mei-218	2.24656	0.444612	-0.461074	-0.0577819	0.246447	0.116642	0.839785	0.526568	0.209663	0.999544
FBgn0002715	mei-S332	0.700556	0.964854	-0.718944	0.156301	0.139285	0.148145	0.74773	0.464391	0.229753	0.999544
FBgn0002716	mei-W68	1.20542	-0.682079	0.747831	0.0905958	0.0235027	0.00208476	0.677398	0.233829	0.0391228	0.999544
FBgn0002719	Men	10.3563	0.0724568	0.00351589	0.0668286	0.654637	0.976934	0.583898	0.661996	0.55072	0.999544
FBgn0002723	Met	4.72314	0.0507986	0.18131	0.00567793	0.602192	0.0198648	0.938098	0.644743	0.10699	0.999544
FBgn0002733	E(spl)mbeta-HLH	2.35634	-0.0719384	0.265805	0.120772	0.553717	0.00744496	0.1947	0.632319	0.0681898	0.999544
FBgn0002736	mago	4.82606	0.234945	-0.0606767	0.0178398	0.0677648	0.516762	0.848168	0.355837	0.407674	0.999544
FBgn0002772	Mlc1	9.28243	0.186989	0.209946	0.186591	0.118127	0.0238071	0.0421477	0.442392	0.112529	0.999544
FBgn0002773	Mlc2	10.4217	0.159708	0.12725	0.163831	0.220138	0.195055	0.0992747	0.511241	0.258888	0.999544
FBgn0002774	mle	5.94916	0.102879	0.0821341	-0.0161737	0.207308	0.181879	0.788638	0.507489	0.252069	0.999544
FBgn0002775	msl-3	2.97303	0.0836035	-0.244338	-0.125861	0.665791	0.103426	0.391142	0.665924	0.199403	0.999544
FBgn0002778	mnd	6.68482	-0.159176	-0.104295	-0.102845	0.273176	0.338423	0.345046	0.537512	0.333646	0.999544
FBgn0002780	mod	7.90129	0.116061	-0.0359658	-0.0349659	0.5107	0.785624	0.791435	0.618598	0.497878	0.999544
FBgn0002783	mor	5.59282	0.1783	-0.294628	-0.0774649	0.370227	0.0568312	0.602695	0.574372	0.159016	0.999544
FBgn0002787	Rpn8	7.16808	0.0447423	0.0375115	-0.0350762	0.567725	0.524713	0.551748	0.633822	0.410946	0.999544
FBgn0002789	Mp20	9.10972	-0.0840859	-1.62e-05	0.0063517	0.486674	0.999858	0.944023	0.612941	0.555673	0.999544
FBgn0002791	mr	3.69459	0.143419	-0.108211	-0.0255296	0.360207	0.359087	0.827168	0.572908	0.341615	0.999544
FBgn0002868	MtnA	10.2435	-0.787572	-0.232624	0.0209033	0.00250496	0.195	0.905521	0.0863689	0.258886	0.999544
FBgn0002869	MtnB	-1.34175	-0.766776	0.387405	0.315711	0.529104	0.673412	0.731068	0.624174	0.46341	0.999544
FBgn0002872	mu2	3.29233	0.909769	-0.083894	-0.222667	0.116525	0.843368	0.60096	0.440938	0.516197	0.999544
FBgn0002873	mud	3.21542	1.56711	-0.278763	0.0501916	0.183021	0.748465	0.953906	0.49081	0.48697	0.999544
FBgn0002878	mus101	2.90904	0.224745	-0.291496	-0.0699207	0.384886	0.141197	0.717908	0.581045	0.227623	0.999544
FBgn0002887	mus201	3.45776	0.0319043	-0.134522	-0.0468325	0.826584	0.227286	0.669733	0.708936	0.275838	0.999544
FBgn0002891	PolZ1	3.31705	0.11501	-0.0189522	-0.0698571	0.507901	0.884226	0.592574	0.617567	0.526511	0.999544
FBgn0002899	mus301	0.782928	0.89647	-0.999614	-0.0765124	0.417244	0.242302	0.927573	0.590248	0.284954	0.999544
FBgn0002901	mus304	2.05117	0.028059	-0.45063	-0.20338	0.933839	0.0886385	0.430202	0.73155	0.188175	0.999544
FBgn0002905	PolQ	3.03206	0.302688	-0.0815578	-0.122113	0.185117	0.629458	0.471486	0.491584	0.448333	0.999544
FBgn0002906	Blm	3.37796	-0.0362999	-0.207018	-0.215131	0.901771	0.354728	0.336557	0.727302	0.339729	0.999544
FBgn0002909	mus312	3.2559	0.149773	-0.0127212	-0.0286198	0.213477	0.886428	0.748193	0.509015	0.526636	0.999544
FBgn0002914	Myb	5.95067	0.0879729	-0.0407531	-0.0323919	0.270188	0.493557	0.585577	0.536472	0.399283	0.999544
FBgn0002917	na	1.00316	-0.0391996	0.259093	-0.185079	0.892632	0.24487	0.402636	0.725751	0.286099	0.999544
FBgn0002921	Atpalpha	9.00704	0.0529893	0.0172269	-0.0557795	0.503956	0.771868	0.352138	0.616608	0.494201	0.999544
FBgn0002924	ncd	2.50714	0.74949	-0.390631	-0.0767035	0.222847	0.395424	0.866428	0.512962	0.35786	0.999544
FBgn0002926	ndl	0.769291	2.72079	0.296958	0.153614	0.273265	0.872618	0.933885	0.537512	0.523874	0.999544
FBgn0002930	nec	8.20697	-0.269356	0.119131	0.0519494	0.0484313	0.23258	0.597896	0.309657	0.279424	0.999544
FBgn0002931	net	3.13288	0.208775	0.369951	0.110061	0.179319	0.00355425	0.342934	0.487972	0.0507144	0.999544
FBgn0002932	neur	3.07358	-0.0176541	-0.250964	-0.120455	0.926411	0.0917	0.406646	0.730545	0.190878	0.999544
FBgn0002939	ninaD	2.43969	-0.781637	-0.198412	-0.0797808	0.000744389	0.202709	0.602918	0.044932	0.263029	0.999544
FBgn0002945	nkd	3.36914	0.00774748	0.413253	0.117029	0.961595	0.00227204	0.339863	0.735525	0.0398837	0.999544
FBgn0002948	nod	3.05156	0.377949	-0.425885	-0.147239	0.227872	0.0772302	0.528456	0.516322	0.178141	0.999544
FBgn0002962	nos	1.88846	2.12486	-0.90682	-0.0558057	0.285604	0.546104	0.970244	0.542027	0.419392	0.999544
FBgn0002973	numb	4.67532	0.232373	-0.0214452	-0.225269	0.152052	0.857328	0.0689725	0.473931	0.520707	0.999544
FBgn0002985	odd	1.74958	0.0922829	-0.131532	0.394525	0.843081	0.709958	0.2705	0.713146	0.47563	0.999544
FBgn0002989	okr	2.73482	0.247893	-0.3165	-0.0600999	0.244617	0.0551359	0.704456	0.526568	0.157637	0.999544
FBgn0003002	opa	0.764296	0.0818049	0.1865	0.0562334	0.711265	0.26903	0.73573	0.681611	0.300013	0.999544
FBgn0003008	or	3.80832	0.0145247	-0.0695899	0.0224227	0.791931	0.103087	0.589403	0.703022	0.199065	0.999544
FBgn0003015	osk	5.37333	2.04337	0.24093	-0.0264593	0.158324	0.821142	0.980181	0.476111	0.509978	0.999544
FBgn0003016	osp	4.9947	0.266309	0.271077	-0.10551	0.250588	0.124607	0.540856	0.5279	0.214828	0.999544
FBgn0003023	otu	2.99066	1.75401	-0.25835	-0.229021	0.267365	0.826099	0.845558	0.535681	0.511488	0.999544
FBgn0003028	ovo	4.74614	0.629946	-0.0892671	-0.102441	0.14963	0.781278	0.750074	0.471507	0.497294	0.999544
FBgn0003041	pbl	4.28925	0.493564	-0.153961	-0.0410198	0.16651	0.559256	0.87592	0.48247	0.424456	0.999544
FBgn0003042	Pc	2.95626	0.199925	-0.0460916	-0.094759	0.157871	0.658937	0.367555	0.475649	0.457791	0.999544
FBgn0003044	Pcl	4.13807	0.444634	-0.321989	-0.0627595	0.23845	0.256171	0.822384	0.524232	0.292207	0.999544
FBgn0003048	pcx	5.63396	0.00631455	0.0646023	-0.0253308	0.917314	0.167199	0.581194	0.729929	0.242079	0.999544
FBgn0003053	peb	6.15577	-0.116017	0.136248	0.138382	0.71838	0.574352	0.568415	0.683728	0.430129	0.999544
FBgn0003062	Fib	6.25573	0.1347	-0.0144304	-0.02861	0.460467	0.915801	0.834032	0.602655	0.534675	0.999544
FBgn0003067	Pepck1	9.26889	0.434635	0.118138	0.236093	0.0458322	0.452961	0.140905	0.303834	0.380844	0.999544
FBgn0003068	per	4.25416	-0.0284438	0.359317	-0.0224209	0.882326	0.0196679	0.87683	0.724218	0.106929	0.999544
FBgn0003071	Pfk	7.02525	0.211657	-0.0302018	0.0504734	0.0298814	0.664305	0.469978	0.254347	0.459681	0.999544
FBgn0003074	Pgi	8.37447	0.0792229	-0.02269	0.106511	0.464505	0.779577	0.197002	0.60423	0.496862	0.999544
FBgn0003076	Pgm1	9.25102	0.0380395	-0.0452239	0.0771213	0.81924	0.718288	0.539567	0.708936	0.477576	0.999544
FBgn0003079	Raf	4.69054	-0.019095	-0.00588455	-0.0685696	0.868711	0.946013	0.433283	0.720224	0.541836	0.999544
FBgn0003082	phr	3.21154	0.548528	-0.200605	0.204181	0.279111	0.595702	0.589206	0.538628	0.437024	0.999544
FBgn0003087	pim	0.592885	-0.0983012	-1.69573	-0.471192	0.945666	0.15228	0.684394	0.733735	0.231891	0.999544
FBgn0003090	pk	2.8569	0.298341	0.203058	-0.0862264	0.0675202	0.0964511	0.468884	0.355721	0.194128	0.999544
FBgn0003091	Pkc53E	2.12098	0.106278	0.416481	-0.0193319	0.537244	0.00365672	0.881625	0.627642	0.0507144	0.999544
FBgn0003093	Pkc98E	5.67764	-0.010806	0.238866	-0.0133733	0.944325	0.0496947	0.908563	0.733529	0.151719	0.999544
FBgn0003114	plu	-0.828563	1.92762	-1.16371	-0.0500447	0.240869	0.352106	0.967764	0.524753	0.338369	0.999544
FBgn0003116	pn	4.76125	-0.133338	-0.151699	-0.00737168	0.231993	0.0764307	0.92888	0.519188	0.177405	0.999544
FBgn0003117	pnr	1.94541	-0.362657	0.149454	0.0181824	0.0295173	0.216887	0.878531	0.254347	0.269331	0.999544
FBgn0003118	pnt	4.10168	-0.170718	0.105147	-0.0968995	0.192254	0.28291	0.321439	0.495975	0.306443	0.999544
FBgn0003124	polo	3.61706	1.2354	-0.550596	-0.324123	0.268613	0.508852	0.696406	0.536217	0.404514	0.999544
FBgn0003134	Pp1alpha-96A	8.97374	-0.0542519	0.267452	0.0615263	0.692421	0.0153121	0.551931	0.674866	0.0960176	0.999544
FBgn0003137	Ppn	8.53151	-0.264073	0.114779	0.0179511	0.065197	0.274546	0.862515	0.351706	0.301834	0.999544
FBgn0003139	PpV	4.88366	0.0959819	-0.051791	-0.0199986	0.35949	0.509156	0.79796	0.572815	0.404563	0.999544
FBgn0003141	pr	5.34658	0.0806772	-0.112795	0.00168359	0.243323	0.0363326	0.973782	0.525373	0.132831	0.999544
FBgn0003149	Prm	8.96439	-0.0413616	0.14428	0.106283	0.728674	0.117417	0.242837	0.686144	0.210255	0.999544
FBgn0003159	CG2841	5.91184	-0.0801403	0.0888902	-0.0406723	0.496574	0.319164	0.645596	0.615473	0.324873	0.999544
FBgn0003162	Pu	5.66274	0.27626	0.147175	-0.0832838	0.0363699	0.129022	0.381936	0.274371	0.219342	0.999544
FBgn0003165	pum	5.36385	0.393372	-0.0186262	-0.10542	0.18926	0.932857	0.634321	0.494589	0.538744	0.999544
FBgn0003169	put	6.31192	-0.123995	0.0831574	0.0291633	0.102878	0.143591	0.600279	0.4177	0.228161	0.999544
FBgn0003175	px	5.7684	-0.0507031	0.0373086	-0.105759	0.627773	0.635349	0.186483	0.652564	0.450878	0.999544
FBgn0003187	qua	1.23927	1.22573	-0.525332	-0.125769	0.329593	0.577429	0.893536	0.560448	0.430685	0.999544
FBgn0003189	r	6.13975	0.487589	0.358836	0.0196043	0.128231	0.136396	0.933486	0.452222	0.223966	0.999544
FBgn0003204	ras	5.66633	0.187766	-0.0515134	-0.011256	0.152072	0.594099	0.907017	0.473931	0.436189	0.999544
FBgn0003205	Ras85D	6.13871	-0.0377451	0.0630349	-0.0488583	0.577886	0.223008	0.341694	0.637586	0.273992	0.999544
FBgn0003206	Ras64B	5.42554	-0.163949	0.095104	0.0234266	0.0104082	0.042084	0.600609	0.164597	0.140634	0.999544
FBgn0003209	raw	7.28396	-0.303945	0.185744	0.0791212	0.026381	0.0662644	0.419495	0.243492	0.167921	0.999544
FBgn0003210	rb	5.79934	0.0334988	-0.0459169	-0.0477285	0.568767	0.303277	0.285057	0.634385	0.317435	0.999544
FBgn0003218	rdgB	5.05155	0.0763275	-0.045638	-0.0563284	0.514065	0.603453	0.52211	0.619213	0.439483	0.999544
FBgn0003227	rec	0.340331	1.08256	-0.000501927	-0.0667089	0.138997	0.999255	0.901299	0.463903	0.555571	0.999544
FBgn0003231	ref(2)P	9.74629	-0.168168	0.026568	-0.0608081	0.175706	0.771771	0.508473	0.487972	0.494201	0.999544
FBgn0003255	rk	0.696395	0.0422403	0.0518968	0.0715265	0.844276	0.748982	0.659537	0.713146	0.48697	0.999544
FBgn0003256	rl	6.28398	-0.055788	0.00936736	-0.0225479	0.519074	0.885082	0.728216	0.621455	0.526529	0.999544
FBgn0003257	r-l	5.88483	-0.18457	0.0694232	-0.00405989	0.344201	0.63375	0.977714	0.564279	0.450065	0.999544
FBgn0003261	Rm62	9.68964	0.00778605	0.0977656	0.0195102	0.941511	0.228465	0.807086	0.732897	0.276539	0.999544
FBgn0003268	rod	3.26356	0.379559	-0.284181	-0.0577027	0.274951	0.277772	0.823353	0.537512	0.303578	0.999544
FBgn0003274	RpLP2	11.1595	0.0595584	-0.062038	0.0907035	0.56632	0.428826	0.251105	0.633203	0.371264	0.999544
FBgn0003275	RpII18	4.44182	0.0626517	-0.00486386	0.0298803	0.390496	0.928818	0.584393	0.582714	0.537306	0.999544
FBgn0003277	RpII215	6.6235	-0.0639272	-0.0113855	0.00291822	0.485656	0.868239	0.966074	0.612312	0.523271	0.999544
FBgn0003278	RpI135	4.87655	0.106391	0.0365202	-0.00720705	0.54477	0.781634	0.956339	0.629061	0.497323	0.999544
FBgn0003279	RpL4	11.5753	-0.132079	-0.0110361	0.0953602	0.160007	0.873237	0.176846	0.476462	0.523987	0.999544
FBgn0003285	rst	2.09949	0.52699	0.241339	-0.0916377	0.0111441	0.107238	0.530482	0.16779	0.20281	0.999544
FBgn0003292	rt	2.27928	0.440945	-0.000777696	-0.0424367	0.163856	0.997341	0.855765	0.479374	0.555356	0.999544
FBgn0003301	rut	5.40731	-0.214853	0.158671	0.00988576	0.134029	0.141025	0.925105	0.457523	0.227623	0.999544
FBgn0003302	rux	2.29397	0.183523	-0.0693775	-0.221532	0.12868	0.437305	0.0191142	0.452222	0.37444	0.999544
FBgn0003308	ry	4.07115	-0.0116854	-0.316333	-0.0248969	0.949758	0.0316961	0.858506	0.734288	0.126064	0.999544
FBgn0003310	S	4.51174	0.465513	-0.0992641	-0.12734	0.072387	0.598378	0.500087	0.366573	0.438073	0.999544
FBgn0003317	sax	4.93853	0.0611769	-0.0856618	-0.0157174	0.371966	0.103859	0.758623	0.574984	0.199604	0.999544
FBgn0003321	sbr	5.37377	0.104135	0.0802726	-0.043858	0.420619	0.409509	0.650503	0.591442	0.363529	0.999544
FBgn0003330	Sce	3.27582	0.167191	-0.146444	-0.0531431	0.196761	0.135714	0.579942	0.499836	0.223422	0.999544
FBgn0003334	Scm	5.08298	0.047602	-0.12343	0.0347252	0.625791	0.102223	0.636314	0.652064	0.199002	0.999544
FBgn0003345	sd	5.5976	0.0430699	0.180824	-0.00551742	0.620922	0.0103687	0.932719	0.650271	0.0770553	0.999544
FBgn0003346	RanGAP	4.32056	0.293955	-0.262297	-0.0413755	0.366528	0.286101	0.864685	0.574272	0.308398	0.999544
FBgn0003353	sei	3.50042	0.0393862	-0.131738	-0.0135877	0.807113	0.284028	0.910873	0.705325	0.30705	0.999544
FBgn0003356	Jon99Cii	5.71045	0.212508	-1.43977	1.71367	0.866449	0.139778	0.0818453	0.719285	0.226561	0.999544
FBgn0003357	Jon99Ciii	5.62569	-0.643779	-1.64469	1.67176	0.639421	0.120999	0.11532	0.656095	0.21333	0.999544
FBgn0003358	Jon99Ci	2.25825	-0.200263	-0.769444	1.27434	0.870862	0.432003	0.198522	0.720583	0.372554	0.999544
FBgn0003360	sesB	11.1323	0.10913	-0.00893978	0.0906662	0.283135	0.905768	0.237298	0.540758	0.532318	0.999544
FBgn0003366	sev	7.66374	0.106675	0.159931	0.0188805	0.365999	0.0792924	0.830146	0.574159	0.179717	0.999544
FBgn0003371	sgg	7.69249	-0.209367	0.134044	-0.000323652	0.0945082	0.151316	0.99717	0.406514	0.231609	0.999544
FBgn0003380	Sh	2.97336	0.2337	0.67813	-0.157889	0.407622	0.00378564	0.459815	0.587652	0.0512529	0.999544
FBgn0003386	Shaw	2.0433	-0.199406	0.313385	0.0991402	0.318621	0.0451215	0.508889	0.556171	0.144568	0.999544
FBgn0003388	shd	3.76081	-0.668021	0.245723	-0.007493	0.000751721	0.0698076	0.954211	0.0449416	0.172327	0.999544
FBgn0003390	shf	5.38857	-0.301237	0.181834	-0.0109095	0.0673466	0.137014	0.927098	0.355359	0.224411	0.999544
FBgn0003391	shg	5.52047	0.195129	0.176371	-0.0378511	0.179671	0.110077	0.724381	0.487972	0.204771	0.999544
FBgn0003392	shi	5.73536	0.0481496	0.0503525	-0.0111351	0.360647	0.207822	0.776881	0.572908	0.265676	0.999544
FBgn0003396	shn	6.33951	-0.0107982	0.206731	0.0523476	0.915253	0.0118807	0.495204	0.729583	0.083875	0.999544
FBgn0003401	shu	1.66601	1.23972	-0.241672	-0.0650117	0.256415	0.765934	0.936111	0.530397	0.492873	0.999544
FBgn0003410	sina	5.18035	0.16069	-0.0748809	-0.0458898	0.0979701	0.296268	0.518898	0.41228	0.313579	0.999544
FBgn0003415	skd	6.24272	0.146593	-0.0572299	-0.0130435	0.463501	0.702418	0.930502	0.603967	0.472663	0.999544
FBgn0003416	sl	4.13579	0.12542	-0.0720999	-0.0473531	0.457325	0.569187	0.707922	0.602475	0.428408	0.999544
FBgn0003423	slgA	5.17418	0.591381	-0.0881919	-0.113004	0.00408085	0.532536	0.425165	0.111687	0.413606	0.999544
FBgn0003429	slo	4.19667	0.145354	0.150824	-0.0874264	0.518047	0.374866	0.604846	0.620802	0.349197	0.999544
FBgn0003435	sm	4.43971	0.160214	0.227569	0.0311778	0.0858799	0.00257814	0.646702	0.391085	0.0427674	0.999544
FBgn0003444	smo	5.42243	-0.382443	0.00962938	0.0313348	0.000409925	0.890917	0.656056	0.0342475	0.528141	0.999544
FBgn0003447	sn	2.4529	0.777743	-0.616005	-0.268648	0.27593	0.254867	0.615284	0.537512	0.29113	0.999544
FBgn0003449	snf	4.84808	-0.00149551	-0.0636775	-0.0107077	0.986625	0.347661	0.873298	0.742205	0.336786	0.999544
FBgn0003459	stwl	4.03675	0.175077	-0.00614108	-0.0124338	0.230287	0.954675	0.908395	0.518075	0.544232	0.999544
FBgn0003460	so	2.08925	-0.0800499	0.190284	-0.0881715	0.552981	0.0706042	0.388393	0.632199	0.172848	0.999544
FBgn0003462	Sod1	9.85145	0.049549	-0.0171112	0.0528756	0.670599	0.844983	0.547199	0.666058	0.516633	0.999544
FBgn0003463	sog	4.57872	-0.00404593	0.02253	0.0394186	0.977182	0.832454	0.711567	0.739419	0.513369	0.999544
FBgn0003464	sol	5.15614	0.129007	0.00426998	-0.018173	0.469013	0.974439	0.891551	0.604919	0.550319	0.999544
FBgn0003475	spir	5.1876	0.120528	-0.0156644	-0.101007	0.453084	0.89625	0.404078	0.600967	0.529687	0.999544
FBgn0003479	spn-A	2.75954	0.066755	-0.142215	-0.158212	0.525774	0.0818159	0.0547165	0.622912	0.182329	0.999544
FBgn0003480	spn-B	0.671972	0.626231	-0.381159	-0.0948969	0.100206	0.180849	0.734152	0.41228	0.251365	0.999544
FBgn0003483	spn-E	2.05265	1.42794	-0.48872	0.12555	0.302524	0.637228	0.903345	0.549097	0.451316	0.999544
FBgn0003495	spz	4.16228	0.138216	-0.126624	-0.132654	0.306985	0.216208	0.195864	0.550796	0.268954	0.999544
FBgn0003499	sr	2.47952	-0.0608951	0.0738078	0.129194	0.608777	0.412645	0.157835	0.646102	0.364653	0.999544
FBgn0003502	Btk29A	5.3867	0.0328241	-0.0554172	0.0409144	0.741638	0.46167	0.585767	0.690821	0.384231	0.999544
FBgn0003507	srp	6.64485	-0.162421	0.165261	-0.0380048	0.330961	0.192481	0.760162	0.560448	0.257404	0.999544
FBgn0003511	Sry-beta	2.65773	0.0310668	-0.234736	0.0329301	0.803833	0.0193618	0.727051	0.705035	0.106234	0.999544
FBgn0003512	Sry-delta	3.61226	0.118069	-0.351127	0.108849	0.245674	0.000103158	0.158527	0.526568	0.00771374	0.999544
FBgn0003514	sqh	6.00268	-0.187329	0.0774135	0.0272188	0.0332422	0.225612	0.665494	0.264344	0.275244	0.999544
FBgn0003515	st	0.208121	0.183196	-1.39136	-1.45376	0.845584	0.0780525	0.0664343	0.71377	0.178526	0.999544
FBgn0003517	sta	11.7344	0.0211687	-0.0588757	0.100137	0.840211	0.458716	0.212822	0.712279	0.383546	0.999544
FBgn0003520	stau	5.40427	0.319969	-0.0154353	-0.0788427	0.0430072	0.891831	0.489567	0.295944	0.528425	0.999544
FBgn0003525	stg	2.98567	0.974176	-0.630103	-0.213219	0.349932	0.422123	0.784518	0.567676	0.368017	0.999544
FBgn0003527	stil	-0.539577	1.80652	-0.78334	0.342155	0.205964	0.466088	0.749031	0.505467	0.386004	0.999544
FBgn0003545	sub	-0.19666	1.99312	-1.48261	0.130991	0.315954	0.337306	0.931735	0.554683	0.333086	0.999544
FBgn0003557	Su(dx)	6.80957	-0.302064	0.130441	-0.0874945	0.0446682	0.234917	0.421552	0.300408	0.280815	0.999544
FBgn0003559	su(f)	4.85818	-0.0222171	0.111694	0.010051	0.76849	0.0588546	0.859445	0.698193	0.161701	0.999544
FBgn0003567	su(Hw)	4.92475	-0.0108045	-0.0451509	-0.0589503	0.936439	0.658535	0.564541	0.732181	0.457579	0.999544
FBgn0003575	su(sable)	5.43311	-0.0588928	0.0128639	0.0122423	0.389406	0.801201	0.810609	0.582283	0.502668	0.999544
FBgn0003598	Su(var)3-7	5.22546	0.0967811	-0.343333	-0.103632	0.616994	0.02561	0.477921	0.649462	0.115812	0.999544
FBgn0003607	Su(var)205	5.42869	0.208101	-0.170962	-0.0434047	0.161869	0.128265	0.692233	0.478164	0.218208	0.999544
FBgn0003612	Su(var)2-10	5.25025	0.267771	-0.299667	-0.0708323	0.235878	0.0834727	0.672586	0.522295	0.183001	0.999544
FBgn0003638	su(w[a])	6.16456	0.0635018	-0.0847669	-0.170759	0.861314	0.756792	0.534071	0.71745	0.489568	0.999544
FBgn0003651	svp	7.17144	-0.171185	0.123133	0.0345743	0.190742	0.210287	0.720633	0.495015	0.266932	0.999544
FBgn0003654	sw	6.61017	0.040097	0.0384976	-0.0108054	0.487352	0.377133	0.802644	0.612941	0.350348	0.999544
FBgn0003655	swa	2.81168	1.61955	-0.766941	0.129425	0.297521	0.513612	0.911803	0.546607	0.406641	0.999544
FBgn0003656	sws	7.24379	-0.134307	0.0448791	-0.0103613	0.0735218	0.413198	0.849085	0.368172	0.364653	0.999544
FBgn0003660	Syb	7.07755	-0.161971	0.0193498	-0.0332438	0.0656175	0.761431	0.602687	0.352849	0.491419	0.999544
FBgn0003676	CCT1	6.65916	0.189851	-0.134985	-0.0698062	0.428395	0.453931	0.697212	0.593846	0.381375	0.999544
FBgn0003687	Tbp	3.29105	0.115695	-0.367063	0.00350954	0.439914	0.00313267	0.975035	0.597584	0.0477307	0.999544
FBgn0003701	thr	0.706479	1.18254	-1.54989	-0.264751	0.452742	0.215028	0.82942	0.600967	0.26843	0.999544
FBgn0003710	tipE	1.46127	0.36564	0.331664	-0.0923984	0.0573299	0.0249894	0.510136	0.330907	0.115052	0.999544
FBgn0003714	tko	4.35491	0.164022	-0.202889	0.0118056	0.126038	0.0157737	0.880553	0.452028	0.0973188	0.999544
FBgn0003716	tkv	6.34598	0.154097	-0.048993	0.0167228	0.212931	0.593364	0.854969	0.509015	0.436189	0.999544
FBgn0003721	Tm1	9.33959	0.0864559	0.197444	0.126136	0.32955	0.00613854	0.0660271	0.560448	0.063681	0.999544
FBgn0003731	Egfr	7.41882	-0.0631167	0.00130195	-0.0389307	0.676731	0.990863	0.732359	0.669414	0.553882	0.999544
FBgn0003733	tor	5.42617	0.189946	-0.00638762	-0.00613215	0.16352	0.949234	0.951262	0.479374	0.542641	0.999544
FBgn0003741	tra	3.56836	0.00811301	0.0328553	-0.0460645	0.957977	0.777005	0.691556	0.735417	0.495743	0.999544
FBgn0003742	tra2	4.16287	0.056172	0.0175049	-0.0640105	0.537157	0.797592	0.352721	0.627642	0.501409	0.999544
FBgn0003744	trc	5.57283	-0.0104682	-0.0150785	-0.0418782	0.844766	0.708114	0.303496	0.713357	0.474852	0.999544
FBgn0003748	Treh	7.10461	0.0949435	0.108196	0.0563248	0.260518	0.0941124	0.372455	0.532435	0.19317	0.999544
FBgn0003862	trx	6.84556	-0.0166946	0.227924	0.062353	0.827201	0.000575684	0.284613	0.708936	0.0207264	0.999544
FBgn0003863	alphaTry	7.97766	-0.091178	-0.989769	1.71104	0.943376	0.311407	0.087021	0.733076	0.320875	0.999544
FBgn0003866	tsh	4.11499	-0.0557515	0.211034	0.0774974	0.600593	0.0138392	0.337204	0.644732	0.0902102	0.999544
FBgn0003867	tsl	5.66885	-0.540554	-0.00520016	0.0204798	0.00993771	0.971592	0.888485	0.162133	0.549365	0.999544
FBgn0003870	ttk	6.37922	0.0767638	0.173838	-0.0353291	0.291588	0.00360678	0.515585	0.544745	0.0507144	0.999544
FBgn0003882	tub	5.41269	-0.00497247	-0.082625	-0.0234315	0.925864	0.0493506	0.561534	0.730545	0.15143	0.999544
FBgn0003884	alphaTub84B	9.43493	-0.0492622	-0.142806	-0.000844715	0.654858	0.0945984	0.991853	0.661996	0.193564	0.999544
FBgn0003885	alphaTub84D	6.16012	0.204642	-0.152954	-0.0200304	0.0628711	0.064518	0.801337	0.346168	0.16627	0.999544
FBgn0003888	betaTub60D	5.36015	0.0751147	-0.120078	-0.104303	0.513565	0.172163	0.23327	0.618839	0.245392	0.999544
FBgn0003890	betaTub97EF	7.67472	-0.00546973	-0.117386	0.053147	0.972994	0.339289	0.662676	0.738426	0.333803	0.999544
FBgn0003891	tud	8.22442	0.0370402	0.211688	0.0447671	0.793177	0.0560207	0.674032	0.703546	0.158146	0.999544
FBgn0003892	ptc	2.38625	0.0167809	0.107221	0.092293	0.932723	0.476567	0.539455	0.73143	0.39094	0.999544
FBgn0003896	tup	2.57937	0.115385	0.38454	-0.0542443	0.540033	0.0116567	0.70208	0.627944	0.0832759	0.999544
FBgn0003900	twi	1.44548	-0.0323942	-0.156606	0.113794	0.858075	0.258929	0.408866	0.7166	0.29393	0.999544
FBgn0003941	RpL40	10.3503	-0.0159017	-0.0609014	0.0959751	0.864086	0.387496	0.178517	0.71838	0.354434	0.999544
FBgn0003942	RpS27A	10.9379	-0.00641592	-0.0686978	0.0796564	0.943182	0.316008	0.246793	0.733012	0.323629	0.999544
FBgn0003943	Ubi-p63E	10.4769	-0.342669	0.235737	0.0888228	0.0190238	0.0304108	0.393147	0.213468	0.124105	0.999544
FBgn0003944	Ubx	5.72889	-0.1881	0.0957071	-0.0900275	0.218561	0.401058	0.429164	0.510913	0.360079	0.999544
FBgn0003961	Uro	0.797336	1.04604	-2.58062	-1.81631	0.496999	0.0536144	0.165417	0.615705	0.156335	0.999544
FBgn0003963	ush	3.75658	-0.0978612	0.0705314	-0.0997763	0.453019	0.472236	0.311994	0.600967	0.388751	0.999544
FBgn0003964	usp	5.62377	0.00415962	-0.0823676	-0.00849533	0.94822	0.0976881	0.860122	0.734176	0.194854	0.999544
FBgn0003965	v	5.89791	-0.311274	-0.148637	0.0310917	0.177605	0.386433	0.855067	0.487972	0.353867	0.999544
FBgn0003969	vap	4.3514	0.122998	0.0783518	-0.0923656	0.451835	0.523454	0.45277	0.600778	0.41062	0.999544
FBgn0003977	vir	4.44401	0.0313814	-0.0347032	0.0148489	0.660867	0.520151	0.782367	0.663847	0.409032	0.999544
FBgn0003978	vls	3.55968	0.229025	-0.086245	0.0814962	0.194014	0.509853	0.533216	0.497788	0.404984	0.999544
FBgn0003979	Vm26Aa	1.76707	3.47082	-1.30726	-0.864795	0.49796	0.735247	0.822861	0.615933	0.482724	0.999544
FBgn0003980	Vm26Ab	0.980597	2.57231	-0.975907	-1.25189	0.57734	0.782347	0.723199	0.637247	0.497323	0.999544
FBgn0003983	Vm34Ca	0.239763	3.8119	-2.15476	-0.725364	0.564143	0.67621	0.887994	0.633203	0.464349	0.999544
FBgn0003984	vn	1.79188	-0.0994172	0.334844	-0.0687631	0.580435	0.020247	0.612814	0.638343	0.10699	0.999544
FBgn0003996	w	1.49615	1.00604	-0.639768	-1.00223	0.129243	0.207098	0.0538267	0.45232	0.265333	0.999544
FBgn0003997	hid	3.68827	0.0457212	0.418267	0.0788362	0.66619	2.38e-05	0.327973	0.665924	0.00413054	0.999544
FBgn0004003	wbl	0.323397	0.301535	0.0579959	0.0671944	0.563414	0.88241	0.86394	0.633203	0.526114	0.999544
FBgn0004034	y	2.47594	1.706	1.25826	-0.0679946	0.00320749	0.0050952	0.868271	0.0963218	0.0589688	0.999544
FBgn0004045	Yp1	14.3626	-0.275398	-1.32643	-0.410603	0.449715	6.05e-05	0.141447	0.600533	0.00600404	0.999544
FBgn0004047	Yp3	12.3676	-0.0705679	-1.21936	-0.349882	0.848919	0.000206398	0.21722	0.714622	0.0111464	0.999544
FBgn0004049	yrt	4.55847	0.154038	-0.102482	-0.0768014	0.386032	0.442584	0.563864	0.581152	0.376996	0.999544
FBgn0004050	z	4.1227	0.118117	-0.210511	-0.0360019	0.309103	0.0218452	0.677426	0.55243	0.110028	0.999544
FBgn0004055	uzip	5.0459	-0.00653632	0.077917	0.0646675	0.952006	0.345215	0.431953	0.734386	0.335756	0.999544
FBgn0004057	Zw	7.02051	-0.147133	0.0273204	0.0587651	0.526615	0.875306	0.735973	0.622912	0.524775	0.999544
FBgn0004066	Prosalpha4	7.82242	-0.00335075	-0.0482164	-0.0304916	0.969978	0.474254	0.649755	0.737735	0.389796	0.999544
FBgn0004087	Dhfr	4.32454	-0.547641	-0.0797288	-0.0242137	4.58e-05	0.340318	0.770039	0.0131466	0.334266	0.999544
FBgn0004101	bs	3.6782	0.0583774	-0.115063	0.000553571	0.496621	0.0838079	0.993131	0.615473	0.18336	0.999544
FBgn0004103	Pp1-87B	7.49112	0.0209	0.00287699	0.0148436	0.669028	0.93754	0.68652	0.665924	0.539864	0.999544
FBgn0004106	Cdk1	1.35743	1.37256	-0.797077	-0.252013	0.38519	0.505146	0.832363	0.581045	0.403554	0.999544
FBgn0004107	Cdk2	2.63245	0.601485	-0.474472	-0.13797	0.376775	0.356121	0.786595	0.576922	0.340538	0.999544
FBgn0004108	Nrt	2.94214	0.311136	-0.081499	0.166813	0.205041	0.654344	0.36288	0.504451	0.45604	0.999544
FBgn0004117	Tm2	9.12541	0.0437668	0.177178	0.138874	0.693871	0.0430232	0.106571	0.675117	0.142229	0.999544
FBgn0004132	boca	4.12016	0.000729826	-0.145858	-0.0106275	0.990136	0.00305884	0.811069	0.743009	0.0476513	0.999544
FBgn0004133	blow	2.73545	0.471532	0.280459	-0.05136	0.0192781	0.0591595	0.71922	0.213468	0.161715	0.999544
FBgn0004167	kst	8.63761	-0.218181	0.185725	0.00395375	0.179073	0.130622	0.973648	0.487972	0.22052	0.999544
FBgn0004169	up	9.54974	0.187865	0.32796	0.145566	0.126353	0.00127063	0.11602	0.452205	0.0299381	0.999544
FBgn0004177	mts	7.83846	-0.0789943	-0.0278908	-0.0531596	0.156242	0.498252	0.202761	0.475649	0.401012	0.999544
FBgn0004179	Csp	6.13271	0.0485451	-0.0910143	-0.0385229	0.446585	0.0663076	0.42249	0.599714	0.167943	0.999544
FBgn0004198	ct	3.29808	0.224377	0.191894	-0.191997	0.225045	0.170508	0.170289	0.51394	0.244755	0.999544
FBgn0004227	nonA	5.56777	0.0212648	0.107455	-0.0521828	0.725191	0.0256384	0.257885	0.685873	0.115812	0.999544
FBgn0004228	mex1	0.0976334	-0.845584	-0.563269	1.28701	0.470439	0.537253	0.166027	0.6055	0.415279	0.999544
FBgn0004237	Hrb87F	6.20411	0.144319	-0.0640453	-0.090192	0.304841	0.541928	0.392343	0.54967	0.417366	0.999544
FBgn0004240	DptA	0.917978	-1.85954	-0.133198	0.31176	0.0905643	0.86823	0.698181	0.399302	0.523271	0.999544
FBgn0004242	Syt1	3.95734	-0.253266	0.0696101	-0.00352201	0.273645	0.685841	0.983641	0.537512	0.468228	0.999544
FBgn0004244	Rdl	1.36673	0.0934381	0.498934	-0.118319	0.760052	0.0403899	0.610935	0.695547	0.138163	0.999544
FBgn0004359	T48	4.04832	0.113522	0.00690295	-0.108054	0.311253	0.934034	0.203383	0.553678	0.538976	0.999544
FBgn0004362	HmgD	6.15646	0.53212	-0.0785612	-0.128442	0.200802	0.798281	0.676442	0.501933	0.501548	0.999544
FBgn0004363	porin	9.41984	0.171916	-0.107216	0.00651266	0.0164445	0.0426411	0.897282	0.200119	0.141663	0.999544
FBgn0004367	mei-41	3.11544	0.107442	-0.0154457	-0.0360756	0.627373	0.925965	0.828255	0.652564	0.53694	0.999544
FBgn0004368	Ptp4E	5.88098	-0.0725791	0.212238	-0.0526778	0.563725	0.0326456	0.577515	0.633203	0.127447	0.999544
FBgn0004369	Ptp99A	5.92652	-0.010555	0.198136	0.0284502	0.912632	0.0110964	0.694758	0.72945	0.0799532	0.999544
FBgn0004370	Ptp10D	5.37296	0.1867	0.159603	0.0356323	0.0995449	0.0635325	0.667136	0.41228	0.165485	0.999544
FBgn0004373	fwd	6.49364	0.0240731	-0.0334089	-0.0245596	0.770512	0.591424	0.692704	0.698284	0.435682	0.999544
FBgn0004374	neb	2.56025	0.490228	0.0452086	0.119064	0.0825678	0.825968	0.563801	0.385153	0.511472	0.999544
FBgn0004378	Klp61F	1.5077	1.27072	-0.746388	-0.163193	0.276554	0.397117	0.851979	0.537997	0.358831	0.999544
FBgn0004379	Klp67A	1.27844	1.03783	-0.917375	-0.14809	0.336661	0.268366	0.856267	0.562864	0.299856	0.999544
FBgn0004380	Klp64D	4.10189	0.133532	-0.0320352	0.0683498	0.178159	0.661923	0.354514	0.487972	0.458885	0.999544
FBgn0004381	Klp68D	4.29752	-0.29531	0.0683181	-0.0215916	0.00709762	0.372108	0.77611	0.143577	0.347807	0.999544
FBgn0004387	Klp98A	5.92544	0.0327919	0.0348821	-0.00211201	0.670362	0.548159	0.970877	0.665924	0.42015	0.999544
FBgn0004390	RasGAP1	5.03408	0.0627005	0.0743617	-0.0608459	0.590493	0.398622	0.48862	0.64182	0.359323	0.999544
FBgn0004391	shtd	4.24217	0.140023	-0.115688	-0.0150052	0.503814	0.463444	0.923782	0.616608	0.38485	0.999544
FBgn0004395	unk	4.74072	0.262683	0.345833	-0.0785282	0.0461405	0.00124099	0.410524	0.304436	0.02986	0.999544
FBgn0004396	CrebA	5.31057	-0.0198426	0.289503	-0.0184002	0.891741	0.013883	0.86681	0.725389	0.0902102	0.999544
FBgn0004397	Vinc	6.43553	-0.222134	0.137255	0.00843408	0.0393349	0.0858102	0.913052	0.282612	0.184867	0.999544
FBgn0004400	rhi	0.281388	1.28258	-0.145535	0.0587136	0.309607	0.876956	0.950182	0.552651	0.524973	0.999544
FBgn0004401	Pep	7.40892	0.101842	0.00255928	-0.0384561	0.271739	0.970314	0.577366	0.537512	0.548834	0.999544
FBgn0004403	RpS14a	9.83416	-0.0287943	-0.0660084	0.081404	0.766903	0.370374	0.27152	0.69804	0.346971	0.999544
FBgn0004404	RpS14b	8.99912	-0.0178714	-0.0817171	0.0848082	0.854316	0.270942	0.253724	0.715303	0.30059	0.999544
FBgn0004406	PolG1	3.38923	0.225415	-0.0106669	-0.0351396	0.277253	0.944814	0.819718	0.53852	0.541538	0.999544
FBgn0004407	PolG2	3.40968	-0.0063044	0.0349772	0.0448774	0.929811	0.518224	0.40855	0.730545	0.40825	0.999544
FBgn0004419	me31B	7.5135	0.426793	-0.424802	-0.206828	0.303869	0.177607	0.504874	0.549268	0.249061	0.999544
FBgn0004425	LysB	2.93917	-0.608882	-0.395852	0.00515125	0.454036	0.518435	0.993263	0.601128	0.40825	0.999544
FBgn0004427	LysD	6.85318	-1.72176	-0.402039	-0.0406251	0.0335608	0.489176	0.943978	0.264451	0.397739	0.999544
FBgn0004429	LysP	7.99587	-0.605422	0.138938	0.162829	0.06481	0.559567	0.494711	0.350317	0.424515	0.999544
FBgn0004431	LysX	0.0917159	-2.39897	0.510704	0.0799535	0.0157744	0.471216	0.909673	0.197303	0.388122	0.999544
FBgn0004432	Cyp1	9.56905	0.039729	-0.130473	-0.016664	0.657935	0.0627324	0.804758	0.663624	0.164601	0.999544
FBgn0004435	Galphaq	5.8681	-0.122132	0.174422	-0.0207511	0.0676186	0.00139593	0.66869	0.355721	0.0305621	0.999544
FBgn0004436	Ubc6	6.45726	0.0291564	0.0553295	0.0396315	0.669458	0.286887	0.442729	0.665924	0.308767	0.999544
FBgn0004449	Ten-m	6.7975	-0.281628	0.201578	0.0382777	0.0702183	0.0839823	0.734498	0.362011	0.183474	0.999544
FBgn0004456	mew	6.41414	-0.0747395	0.269072	0.0181746	0.525979	0.00537063	0.836963	0.622912	0.0601963	0.999544
FBgn0004463	RpIII128	4.25829	0.0508171	0.0486453	0.040469	0.69756	0.621442	0.680956	0.67721	0.44531	0.999544
FBgn0004465	Su(P)	5.05876	0.0597199	-0.0226113	-0.0497862	0.316454	0.611182	0.268261	0.554699	0.44163	0.999544
FBgn0004507	GlyP	10.659	0.327578	0.325865	0.0930596	0.0634592	0.0168836	0.468634	0.346558	0.0995053	0.999544
FBgn0004509	Fur1	5.7404	-0.14195	0.102509	-0.0546691	0.0959244	0.109214	0.383126	0.409363	0.204237	0.999544
FBgn0004510	Ets97D	3.31604	0.246876	-0.254126	-0.00247161	0.19666	0.0823633	0.986045	0.499824	0.182527	0.999544
FBgn0004512	Mdr49	4.80029	0.0360867	-0.048508	0.0795915	0.826719	0.696092	0.522803	0.708936	0.470949	0.999544
FBgn0004513	Mdr65	3.25839	0.000323367	0.220537	0.0252528	0.998066	0.0368682	0.801696	0.744605	0.13355	0.999544
FBgn0004516	Gad1	1.6807	0.471568	-0.0570787	-0.410885	0.580158	0.929263	0.524678	0.638298	0.537426	0.999544
FBgn0004556	Dbp73D	4.13304	0.0870688	0.0134169	-0.0431893	0.541232	0.900041	0.686461	0.627944	0.530426	0.999544
FBgn0004569	aos	4.3509	0.0763619	0.240095	0.0593789	0.480369	0.00653543	0.466086	0.609138	0.0642463	0.999544
FBgn0004573	5-HT7	0.889185	0.0819774	0.332339	-0.146235	0.743393	0.0891155	0.442404	0.690903	0.188896	0.999544
FBgn0004574	Rop	5.84665	-0.0630705	0.010338	0.00228178	0.411355	0.856938	0.96825	0.588114	0.520615	0.999544
FBgn0004575	Syn	1.85039	0.0889274	0.523407	0.0384872	0.766837	0.0293349	0.865629	0.69804	0.121551	0.999544
FBgn0004580	Cbp53E	2.7215	0.271655	0.418022	0.00296677	0.329345	0.0541645	0.988621	0.560448	0.15689	0.999544
FBgn0004583	ex	6.22437	0.0909526	0.310601	0.0820162	0.376625	0.000465243	0.291193	0.576922	0.0176662	0.999544
FBgn0004584	Rrp1	3.19683	0.569866	-0.237428	-0.023377	0.221291	0.493554	0.945969	0.512095	0.399283	0.999544
FBgn0004587	B52	7.44272	0.108921	0.0426633	-0.0886857	0.498485	0.723572	0.464294	0.615933	0.479351	0.999544
FBgn0004595	pros	2.50236	0.23964	0.530389	-0.174803	0.25405	0.00241615	0.271858	0.528896	0.0413824	0.999544
FBgn0004597	CycC	3.20215	0.0621955	-0.130697	-0.0632691	0.553598	0.107175	0.425071	0.632319	0.202769	0.999544
FBgn0004598	Fur2	6.60954	0.28667	-0.205767	-0.00316402	0.0538683	0.0649351	0.976454	0.323238	0.166739	0.999544
FBgn0004606	zfh1	5.1219	-0.00719405	0.165493	0.00113864	0.938163	0.0252029	0.986979	0.732897	0.115563	0.999544
FBgn0004607	zfh2	1.80941	-0.285227	0.179602	-0.0337227	0.138321	0.212528	0.811791	0.462719	0.267127	0.999544
FBgn0004611	Plc21C	6.03076	-0.115531	0.0524807	-0.0880192	0.473821	0.664271	0.468366	0.607039	0.459681	0.999544
FBgn0004620	GluRIIA	4.44312	0.096535	0.291803	0.212704	0.464312	0.00666192	0.0400738	0.60423	0.0650195	0.999544
FBgn0004629	Cys	6.7737	-0.481757	0.13975	0.0595281	0.0143972	0.317337	0.667254	0.188788	0.324304	0.999544
FBgn0004635	rho	1.29353	-0.112933	0.111997	0.074212	0.523454	0.402923	0.577734	0.622809	0.360848	0.999544
FBgn0004636	Rap1	7.48742	-0.316956	0.144211	-0.0369482	0.00239978	0.0503177	0.601334	0.0836275	0.152567	0.999544
FBgn0004638	drk	6.47227	-0.0710335	0.073938	-0.0567937	0.453568	0.302609	0.426192	0.601041	0.317052	0.999544
FBgn0004643	Zw10	4.47667	0.194881	-0.304018	-0.023659	0.2971	0.0373772	0.864813	0.546277	0.133974	0.999544
FBgn0004646	ogre	6.47446	0.0174703	0.0131741	0.0423458	0.87694	0.876675	0.618803	0.722732	0.524973	0.999544
FBgn0004647	N	4.47175	0.273059	0.290051	-0.0616326	0.212288	0.0833875	0.703823	0.509015	0.182941	0.999544
FBgn0004648	svr	7.39189	0.0104684	-0.0366952	-0.0133001	0.920243	0.641676	0.865774	0.730497	0.452995	0.999544
FBgn0004649	yl	5.77585	2.05484	-0.149001	-0.0833505	0.154993	0.888443	0.937445	0.475452	0.527189	0.999544
FBgn0004650	fs(1)N	3.03109	2.04367	-0.120762	-0.0668437	0.170018	0.91242	0.951451	0.484659	0.533882	0.999544
FBgn0004652	fru	3.47533	0.166638	0.368614	0.00888937	0.104994	5.55e-05	0.905891	0.422197	0.00583112	0.999544
FBgn0004654	Pgd	7.92955	-0.0928607	-0.0981964	0.0432574	0.473957	0.316963	0.656393	0.607039	0.324126	0.999544
FBgn0004655	wapl	5.59299	0.127631	-0.158117	-0.0696022	0.367662	0.144054	0.511979	0.574279	0.228161	0.999544
FBgn0004656	fs(1)h	6.91634	0.0541965	0.0745889	-0.0497339	0.601704	0.343196	0.525042	0.644743	0.335103	0.999544
FBgn0004657	mys	6.70694	-0.099002	0.114429	-0.0228748	0.264959	0.0927035	0.728803	0.534546	0.191736	0.999544
FBgn0004666	sim	-0.377076	1.20697	0.224515	-0.257735	0.31723	0.803643	0.775368	0.555403	0.503615	0.999544
FBgn0004687	Mlc-c	7.12461	-0.182723	0.0460476	0.0055268	0.0525248	0.499944	0.93514	0.319672	0.401414	0.999544
FBgn0004698	Xpc	5.88735	0.0915059	0.0286262	-0.0305789	0.521558	0.789076	0.775089	0.622249	0.49912	0.999544
FBgn0004795	retn	2.4558	0.845248	-0.526827	-0.187966	0.454776	0.536546	0.824811	0.601565	0.415041	0.999544
FBgn0004797	mdy	6.63981	-0.105003	0.0111841	-0.0102948	0.447353	0.913796	0.920625	0.599714	0.534074	0.999544
FBgn0004811	fs(2)ltoPP43	4.30621	-0.220615	-0.191765	-0.0670281	0.0322905	0.0149412	0.366601	0.261003	0.094929	0.999544
FBgn0004828	His3.3B	8.5284	0.07887	0.111265	0.00543308	0.310259	0.0642421	0.925123	0.553306	0.16591	0.999544
FBgn0004832	Xpac	2.1416	0.180508	-0.21022	-0.0627306	0.456266	0.253811	0.729977	0.601825	0.290402	0.999544
FBgn0004837	Su(H)	2.9945	0.0179039	-0.160944	-0.134665	0.883364	0.0902208	0.152386	0.724454	0.18951	0.999544
FBgn0004838	Hrb27C	9.21947	0.0508109	0.0210744	-0.0413617	0.526244	0.726004	0.493284	0.622912	0.479657	0.999544
FBgn0004839	otk	3.21402	-0.0875719	0.144455	0.0979946	0.59243	0.246749	0.428245	0.642471	0.286816	0.999544
FBgn0004852	Ac76E	6.15068	0.0545245	-0.0199083	-0.00132033	0.777	0.890609	0.992721	0.699554	0.528023	0.999544
FBgn0004855	RpII15	3.91012	-0.0422867	-0.0979648	0.0423	0.628309	0.144814	0.520815	0.652913	0.228445	0.999544
FBgn0004856	Bx42	5.66002	0.0647574	-0.115086	0.0135141	0.374934	0.043642	0.804036	0.576567	0.14284	0.999544
FBgn0004858	elB	4.03899	-0.0886172	0.246066	0.0427225	0.383532	0.00337638	0.574883	0.580027	0.0497291	0.999544
FBgn0004859	ci	5.85554	-0.0528783	0.170632	-0.00421875	0.598247	0.0316336	0.955306	0.644151	0.126027	0.999544
FBgn0004860	ph-d	3.72368	0.172062	0.0459498	0.00245206	0.15951	0.610735	0.978265	0.476159	0.44163	0.999544
FBgn0004861	ph-p	4.46801	-0.0629414	0.236124	0.0423733	0.56538	0.00804407	0.606807	0.633203	0.0699419	0.999544
FBgn0004864	hop	5.39355	0.0178626	-0.130373	-0.0169642	0.83353	0.0509287	0.790855	0.710126	0.15371	0.999544
FBgn0004867	RpS2	10.8301	0.0439186	-0.176686	0.0799522	0.6783	0.0348103	0.320116	0.670233	0.130737	0.999544
FBgn0004868	Gdi	8.38934	-0.121965	-0.0317575	-0.000330523	0.0578641	0.496168	0.994319	0.333105	0.400064	0.999544
FBgn0004870	bab1	0.759713	0.263976	0.298328	-0.112529	0.198854	0.0602345	0.463139	0.501395	0.1621	0.999544
FBgn0004872	piwi	3.39073	1.90471	0.294989	0.0192851	0.191973	0.785271	0.985777	0.495975	0.497878	0.999544
FBgn0004875	enc	5.83933	0.118274	-0.109301	-0.0688297	0.369182	0.272256	0.485754	0.574372	0.301019	0.999544
FBgn0004876	cdi	5.12012	0.246735	-0.228712	-0.123451	0.17914	0.101371	0.366267	0.487972	0.198112	0.999544
FBgn0004880	scrt	0.728947	-0.100168	0.583634	-0.12362	0.7486	0.0207923	0.60352	0.691271	0.108316	0.999544
FBgn0004882	orb	4.52837	1.85307	0.214225	0.117308	0.169429	0.829298	0.905983	0.483616	0.51262	0.999544
FBgn0004885	tok	7.3126	-0.00147219	0.147196	0.0533425	0.992098	0.196667	0.634314	0.743796	0.259542	0.999544
FBgn0004888	Scsalpha1	8.53914	0.12532	-0.0537366	0.071264	0.273958	0.529234	0.405644	0.537512	0.412701	0.999544
FBgn0004889	tws	6.30092	0.196501	-0.0566398	-0.048038	0.153854	0.577405	0.636194	0.475166	0.430685	0.999544
FBgn0004893	bowl	4.00327	0.103182	0.220651	-0.014874	0.211783	0.00137418	0.807812	0.509015	0.0304018	0.999544
FBgn0004901	Prat	4.30878	0.323747	0.0513332	-0.039826	0.264209	0.811516	0.853182	0.533554	0.506785	0.999544
FBgn0004903	Rb97D	4.46586	0.0396757	-0.0877248	-0.0281272	0.685026	0.239852	0.702303	0.673509	0.283507	0.999544
FBgn0004907	14-3-3zeta	9.29958	0.0136799	0.0465903	-0.0248722	0.836448	0.354571	0.618719	0.711446	0.339713	0.999544
FBgn0004908	Arl2	2.54796	0.070569	-0.0492837	-0.0341169	0.473591	0.506036	0.64439	0.607039	0.403999	0.999544
FBgn0004910	Eip63F-1	4.07083	0.247855	0.290849	0.120081	0.127628	0.0217623	0.319454	0.452205	0.109724	0.999544
FBgn0004913	Gnf1	4.86688	0.219911	-0.203718	-0.0696469	0.278583	0.185158	0.644743	0.538628	0.253649	0.999544
FBgn0004914	Hnf4	7.93485	-0.0919821	0.150891	0.0411086	0.401262	0.0752758	0.616277	0.587243	0.176757	0.999544
FBgn0004915	TfIIB	4.85746	0.0354803	-0.0519879	0.0242836	0.468628	0.164922	0.50934	0.604842	0.240501	0.999544
FBgn0004919	gol	2.8266	-0.151413	0.537968	0.203874	0.335715	0.000128684	0.0939478	0.562104	0.00868692	0.999544
FBgn0004921	Ggamma1	8.09238	-0.0384118	0.0520885	0.0283989	0.650058	0.415994	0.655734	0.660468	0.365558	0.999544
FBgn0004924	Top1	7.35828	-0.0395953	0.0182811	-0.0910782	0.668395	0.792416	0.197902	0.665924	0.500386	0.999544
FBgn0004926	eIF2beta	7.39894	0.0807755	-0.0522937	0.0318987	0.211915	0.280631	0.506954	0.509015	0.305279	0.999544
FBgn0004957	por	2.25819	0.286623	-0.317799	-0.0360146	0.134368	0.0323359	0.798305	0.457549	0.12726	0.999544
FBgn0004959	phm	0.789609	0.537689	-0.0878145	0.00675204	0.0773613	0.692095	0.975666	0.376736	0.469545	0.999544
FBgn0005198	gig	5.62584	-0.066672	0.0897105	0.00671668	0.260557	0.0507755	0.878567	0.532435	0.153381	0.999544
FBgn0005278	Sam-S	9.23731	-0.0216319	0.10363	0.0197822	0.830936	0.182643	0.795313	0.709294	0.252204	0.999544
FBgn0005322	nmd	5.71501	0.0399639	-0.0787058	0.0295929	0.476909	0.0712828	0.483857	0.607736	0.173405	0.999544
FBgn0005355	Su(fu)	4.25191	0.0509403	-0.1451	-0.027126	0.569455	0.0395928	0.686753	0.634883	0.137064	0.999544
FBgn0005386	ash1	5.11348	0.00186951	-0.0447122	-0.0255145	0.987686	0.624683	0.779721	0.742539	0.446568	0.999544
FBgn0005390	fs(1)M3	4.29989	1.19479	0.214283	-0.182633	0.231617	0.772322	0.805164	0.519033	0.494279	0.999544
FBgn0005391	Yp2	13.1687	-0.224773	-1.52275	-0.515557	0.576723	3.95e-05	0.0980528	0.637072	0.00505259	0.999544
FBgn0005411	U2af50	6.15915	-0.016478	-0.0849115	0.0275898	0.747965	0.0362351	0.476633	0.691196	0.132689	0.999544
FBgn0005427	ewg	5.11117	0.10777	0.0643391	-0.0459881	0.438456	0.537704	0.658896	0.597401	0.415562	0.999544
FBgn0005533	RpS17	10.1563	0.184714	-0.0917066	0.0731404	0.0676518	0.218173	0.323054	0.355721	0.270238	0.999544
FBgn0005536	Mbs	6.72871	-0.077025	0.0920944	0.0195117	0.423752	0.208595	0.786359	0.591687	0.266221	0.999544
FBgn0005561	sv	1.63317	-0.18053	0.466262	0.0102536	0.458653	0.0173529	0.955445	0.602655	0.100647	0.999544
FBgn0005564	Shal	1.93711	0.154248	0.208289	0.0620782	0.342443	0.0962735	0.609924	0.56363	0.194025	0.999544
FBgn0005585	Calr	8.94507	-0.137845	-0.0893801	-0.0366975	0.0615542	0.103742	0.493382	0.342546	0.199604	0.999544
FBgn0005586	Rab3	1.79571	-0.17048	0.349702	-0.0355484	0.585306	0.146982	0.87999	0.639765	0.229232	0.999544
FBgn0005593	RpL7	11.0768	-0.0604348	-0.054198	0.0923114	0.490628	0.412381	0.168607	0.614275	0.364653	0.999544
FBgn0005596	yem	4.19003	0.301107	-0.367959	-0.0948615	0.352025	0.136841	0.694541	0.568656	0.224244	0.999544
FBgn0005612	Sox14	6.23793	-0.333886	0.206033	-0.0204564	0.052855	0.107548	0.869296	0.319672	0.203039	0.999544
FBgn0005616	msl-2	3.17479	-0.0502984	0.173839	-0.0583346	0.635398	0.0379575	0.466907	0.655244	0.134792	0.999544
FBgn0005617	msl-1	5.20646	0.144201	-0.167373	-0.0706155	0.388858	0.188748	0.573074	0.58218	0.256115	0.999544
FBgn0005624	Psc	2.77485	0.418642	0.00199873	-0.116355	0.0765973	0.990715	0.500352	0.375033	0.553864	0.999544
FBgn0005626	ple	4.55035	-0.0906622	-0.328128	-0.348869	0.812518	0.260658	0.232579	0.70692	0.295041	0.999544
FBgn0005631	robo1	3.60919	0.064469	0.246423	0.0216077	0.572595	0.00808873	0.80117	0.635952	0.0701692	0.999544
FBgn0005632	faf	7.37663	-0.0238191	0.0306653	-0.0104877	0.776633	0.627982	0.868065	0.699476	0.447807	0.999544
FBgn0005633	fln	4.68901	0.613133	0.14215	0.289536	0.0997261	0.601935	0.292643	0.41228	0.43894	0.999544
FBgn0005636	nvy	1.34817	0.0432222	0.223423	0.103969	0.85271	0.211444	0.555437	0.714875	0.267127	0.999544
FBgn0005640	Eip63E	5.502	-0.0866082	0.0571643	-0.049893	0.580729	0.627764	0.671953	0.638343	0.447727	0.999544
FBgn0005642	wdn	4.73283	0.0721259	-0.0494926	0.00337049	0.555968	0.591032	0.970714	0.632826	0.435648	0.999544
FBgn0005648	Pabp2	5.1584	0.17706	0.232506	-0.0867312	0.328999	0.0953202	0.522551	0.560448	0.193848	0.999544
FBgn0005649	Rox8	6.85391	-0.0263414	-0.0786057	-0.0675347	0.788307	0.292638	0.364361	0.702102	0.311379	0.999544
FBgn0005654	Orc3	1.88209	0.279817	-0.62151	-0.291111	0.645961	0.187231	0.530449	0.658642	0.254837	0.999544
FBgn0005655	PCNA	2.82439	1.44124	-0.644296	0.100119	0.279105	0.519279	0.919856	0.538628	0.408599	0.999544
FBgn0005659	Ets98B	5.39225	-0.102354	0.159695	-0.0695724	0.606073	0.289645	0.641139	0.645125	0.309883	0.999544
FBgn0005660	Ets21C	1.6107	-0.253147	0.169905	0.171379	0.445989	0.497859	0.494176	0.599647	0.400895	0.999544
FBgn0005666	bt	9.12507	-0.0497737	0.127959	0.00581893	0.731233	0.247152	0.957383	0.686915	0.287099	0.999544
FBgn0005670	Cyp4d1	2.0135	2.06742	0.2053	-0.157571	0.00527939	0.687674	0.757486	0.1242	0.46858	0.999544
FBgn0005671	Vha55	8.63744	0.0322488	-0.0159354	-0.035558	0.75759	0.839277	0.651465	0.695401	0.514925	0.999544
FBgn0005672	spi	5.11263	0.262279	0.214902	-0.016373	0.0942191	0.0699603	0.886015	0.406514	0.172327	0.999544
FBgn0005674	GluProRS	7.07743	0.0281512	0.0282724	0.038504	0.701721	0.609683	0.487971	0.678726	0.441279	0.999544
FBgn0005683	pie	1.64731	0.346216	-0.85086	-0.162428	0.570082	0.0778543	0.727558	0.634883	0.178292	0.999544
FBgn0005694	Aef1	5.5839	0.104377	-0.134705	-0.0548495	0.339411	0.107981	0.502395	0.56363	0.203168	0.999544
FBgn0005695	gcl	5.11313	0.207357	-0.319955	-0.0599552	0.295666	0.03874	0.684641	0.545704	0.13556	0.999544
FBgn0005696	PolA2	1.79402	0.678411	-0.717735	-0.0949442	0.374347	0.220149	0.868975	0.576394	0.271988	0.999544
FBgn0005771	noc	5.6087	-0.145234	0.0976651	0.143574	0.296348	0.349474	0.173797	0.545837	0.337558	0.999544
FBgn0005775	Con	0.394567	1.09161	0.489151	-0.116439	0.0391635	0.208579	0.760767	0.282612	0.266221	0.999544
FBgn0005777	PpD3	5.75053	0.0838538	-0.121476	-0.0991835	0.390884	0.105963	0.182607	0.582714	0.201628	0.999544
FBgn0008635	betaCOP	6.65364	0.0104593	-0.05428	-0.0148615	0.849107	0.197723	0.719676	0.714622	0.259944	0.999544
FBgn0010015	CanA1	3.34307	-0.0608737	0.146946	-0.0396983	0.730518	0.275387	0.7654	0.686646	0.302252	0.999544
FBgn0010019	Cyp4g1	15.6813	-0.0119051	0.0791261	0.126387	0.932858	0.459526	0.24187	0.73143	0.383696	0.999544
FBgn0010039	GstD3	1.37024	0.158693	-0.609804	-0.222474	0.620384	0.0187873	0.365232	0.650271	0.104478	0.999544
FBgn0010051	Itpr	7.12124	0.00635213	-0.0397686	-0.0378853	0.96576	0.721351	0.734001	0.736137	0.478579	0.999544
FBgn0010052	Jhe	1.0271	-0.286915	0.152952	-0.186029	0.308005	0.469031	0.379857	0.551713	0.387372	0.999544
FBgn0010053	Jheh1	6.22819	-0.0739201	-0.298662	-0.0539269	0.702217	0.0492244	0.710851	0.678726	0.151298	0.999544
FBgn0010078	RpL23	10.6615	-0.0200348	-0.0849358	0.0756787	0.821959	0.212674	0.265109	0.708936	0.267127	0.999544
FBgn0010097	gammaTub37C	0.418118	1.75426	-0.571294	-0.510132	0.330968	0.673531	0.706651	0.560448	0.463426	0.999544
FBgn0010100	mAcon1	9.52001	0.166649	-0.0915904	0.0843731	0.204846	0.350345	0.388905	0.504451	0.337996	0.999544
FBgn0010105	comm	1.1173	-0.0233813	0.0290184	-0.139381	0.88278	0.808375	0.250871	0.724218	0.505343	0.999544
FBgn0010113	hdc	4.15287	0.378728	-0.0926909	-0.0144687	0.206094	0.675978	0.947881	0.505467	0.464321	0.999544
FBgn0010114	hig	1.70272	0.238823	0.23492	-0.192119	0.626828	0.527648	0.604946	0.652414	0.412181	0.999544
FBgn0010173	RpA-70	5.65813	0.175633	-0.214657	-0.0734606	0.369813	0.151053	0.615898	0.574372	0.231493	0.999544
FBgn0010194	Wnt5	1.56902	0.543887	-0.0796298	-0.20276	0.162483	0.781896	0.482924	0.47833	0.497323	0.999544
FBgn0010198	RpS15Aa	10.4028	-0.191324	-0.0680761	0.0692348	0.09215	0.414185	0.406406	0.403552	0.365025	0.999544
FBgn0010213	Sod2	6.43023	0.0293032	-0.0773214	0.0525019	0.76083	0.291397	0.470744	0.695762	0.310788	0.999544
FBgn0010215	alpha-Cat	5.85504	0.0418346	-0.0679715	-0.0963154	0.644853	0.323803	0.166633	0.658642	0.326586	0.999544
FBgn0010217	ATPsynbeta	11.4051	0.0969916	-0.0461944	0.0665178	0.356447	0.557152	0.399867	0.571125	0.424051	0.999544
FBgn0010220	Dbp45A	4.33808	0.259448	0.00205704	-0.00131846	0.0292581	0.98064	0.98759	0.254347	0.551676	0.999544
FBgn0010222	Nmdmc	4.94218	0.35456	0.301674	0.381122	0.15578	0.110681	0.0473735	0.475649	0.205248	0.999544
FBgn0010223	Galphaf	1.55888	-0.396868	-0.0398594	-0.0390041	0.343736	0.898641	0.900804	0.564279	0.530402	0.999544
FBgn0010225	Gel	9.7989	-0.138862	0.0477464	0.0319927	0.320256	0.646776	0.758498	0.556734	0.454672	0.999544
FBgn0010226	GstS1	5.03027	0.433914	-0.224974	0.147445	0.0134491	0.0777108	0.238235	0.185417	0.178164	0.999544
FBgn0010228	HmgZ	7.37431	-0.0983157	0.259621	0.124089	0.333823	0.00215145	0.111501	0.561555	0.0393119	0.999544
FBgn0010235	Klc	6.46469	-0.155183	0.0201243	-0.0418499	0.0582315	0.734057	0.481773	0.333746	0.482464	0.999544
FBgn0010238	Lac	5.46156	0.0438475	0.103331	0.0388309	0.502422	0.0439338	0.430796	0.615983	0.142925	0.999544
FBgn0010241	Mdr50	3.42935	-0.033933	0.0658094	0.289418	0.932847	0.828354	0.344992	0.73143	0.512412	0.999544
FBgn0010246	Myo61F	6.18089	-0.283478	-0.110995	-0.0101606	0.155063	0.451839	0.944741	0.475452	0.380795	0.999544
FBgn0010247	Parp	4.95101	0.277959	-0.0692836	-0.0746299	0.181172	0.651946	0.627189	0.488618	0.455438	0.999544
FBgn0010263	Rbp9	6.20698	0.0795662	0.22832	0.0503385	0.585265	0.0460942	0.64603	0.639765	0.146334	0.999544
FBgn0010265	RpS13	10.4652	0.0266816	-0.043752	0.0881965	0.766332	0.518789	0.199678	0.697872	0.408387	0.999544
FBgn0010269	Dsor1	4.34715	0.17905	-0.19693	-0.0888025	0.138638	0.0349999	0.322314	0.463067	0.13116	0.999544
FBgn0010278	Ssrp	5.04284	0.435942	-0.126038	-0.106022	0.190713	0.609214	0.666914	0.495015	0.441185	0.999544
FBgn0010280	Taf4	6.16317	0.0356467	-0.00372115	-0.0260963	0.698452	0.957065	0.706203	0.677611	0.545402	0.999544
FBgn0010282	TfIIFalpha	4.64708	0.127334	-0.184576	-0.0459811	0.461841	0.163071	0.722746	0.602943	0.239382	0.999544
FBgn0010287	Trf	1.62827	-0.00353397	-0.247733	0.0768833	0.981945	0.0448725	0.516362	0.740529	0.144335	0.999544
FBgn0010288	Uch	5.41258	-0.100818	-0.164072	-0.11483	0.525538	0.176745	0.339388	0.622912	0.248568	0.999544
FBgn0010292	bys	5.15131	-0.00422957	0.0031068	-0.00938659	0.964722	0.965561	0.896229	0.736117	0.547356	0.999544
FBgn0010300	brat	4.82501	0.601433	-0.142396	-0.114629	0.108899	0.604475	0.676372	0.429829	0.43982	0.999544
FBgn0010303	hep	5.6124	0.0849175	0.0115694	-0.0591791	0.396145	0.876929	0.431399	0.584752	0.524973	0.999544
FBgn0010309	pigeon	2.68163	0.425221	0.0569517	-0.166909	0.166103	0.801512	0.463689	0.48247	0.502734	0.999544
FBgn0010313	corto	5.73036	0.122925	-0.0939765	0.014214	0.232135	0.224974	0.851999	0.519228	0.274879	0.999544
FBgn0010314	Cks30A	0.268564	1.88755	-1.38293	0.0564987	0.313689	0.340907	0.968641	0.553786	0.334384	0.999544
FBgn0010315	CycD	4.60667	-0.00925685	-0.122426	0.0029549	0.939825	0.193111	0.974452	0.732897	0.257735	0.999544
FBgn0010316	dap	4.09408	0.169224	-0.0136276	-0.0623505	0.324305	0.915081	0.626523	0.558491	0.534448	0.999544
FBgn0010317	CycJ	0.832188	1.87653	-0.501917	0.0614096	0.251367	0.680825	0.959785	0.528178	0.466661	0.999544
FBgn0010328	woc	6.05717	0.227872	-0.221241	-0.0668477	0.253275	0.144255	0.651961	0.528784	0.228161	0.999544
FBgn0010329	Tbh	0.632306	0.0915259	0.202629	-0.0222511	0.834316	0.540665	0.94621	0.710238	0.416789	0.999544
FBgn0010333	Rac1	5.69498	0.154573	-0.049813	-0.0739096	0.0304954	0.333149	0.156097	0.25775	0.331118	0.999544
FBgn0010339	128up	5.15507	0.216229	-0.148674	-0.0144147	0.141041	0.176897	0.893673	0.465334	0.248639	0.999544
FBgn0010340	140up	3.60831	0.0541436	-0.0228994	0.0389932	0.417286	0.646896	0.437436	0.590248	0.45469	0.999544
FBgn0010341	Cdc42	6.47138	-0.107619	-0.0142908	-0.00696081	0.0794384	0.748739	0.875913	0.379294	0.48697	0.999544
FBgn0010342	Map60	3.42452	0.39424	-0.563178	-0.116435	0.320632	0.0672961	0.694706	0.556734	0.169563	0.999544
FBgn0010348	Arf79F	8.56293	-0.0639415	-0.000688258	-0.0185966	0.266476	0.987137	0.663797	0.535278	0.552881	0.999544
FBgn0010350	Cds	6.53904	-0.0123108	0.104834	0.0466954	0.891031	0.130858	0.492056	0.725388	0.220832	0.999544
FBgn0010352	Nc73EF	9.39708	-0.0398879	0.120256	0.062002	0.758627	0.225506	0.527005	0.695401	0.275244	0.999544
FBgn0010355	Taf1	6.09376	0.00734975	0.0339375	0.00524125	0.925508	0.567533	0.92939	0.730545	0.428064	0.999544
FBgn0010356	Taf5	4.20476	0.0850269	-0.173996	0.0353283	0.296999	0.00814394	0.561421	0.546277	0.0701826	0.999544
FBgn0010357	betaTry	7.83179	-0.60901	-1.12845	1.67196	0.620952	0.229975	0.0809191	0.650271	0.277501	0.999544
FBgn0010358	deltaTry	-0.809339	0.277159	0.081896	2.46853	0.882856	0.957708	0.119999	0.724218	0.545577	0.999544
FBgn0010359	gammaTry	0.445539	3.0164	1.69818	-0.184857	0.447103	0.589078	0.952954	0.599714	0.435065	0.999544
FBgn0010379	Akt1	7.33087	-0.0483528	0.151332	0.0597737	0.552362	0.0197991	0.332189	0.631774	0.10699	0.999544
FBgn0010380	AP-1-2beta	6.3642	0.0745099	-0.0325137	-0.00288781	0.21019	0.462159	0.94761	0.509015	0.384453	0.999544
FBgn0010382	CycE	2.45154	0.887096	-1.24658	-0.166373	0.459615	0.184042	0.856446	0.602655	0.252904	0.999544
FBgn0010383	Cyp18a1	5.60001	0.367435	0.0146958	-0.0788426	0.0350738	0.906144	0.528825	0.270978	0.532318	0.999544
FBgn0010385	Def	0.555222	-0.499258	1.09636	0.129622	0.65169	0.2124	0.880736	0.660898	0.267127	0.999544
FBgn0010387	Acbp2	8.54554	0.0965754	-0.0908155	-0.0305809	0.496547	0.396846	0.773821	0.615473	0.358653	0.999544
FBgn0010388	Dro	0.923103	-1.59655	0.380924	0.15274	0.0462174	0.513143	0.792327	0.304436	0.406603	0.999544
FBgn0010389	htl	2.9729	-0.0921809	0.233989	0.048492	0.532678	0.0440345	0.662564	0.625351	0.143007	0.999544
FBgn0010391	SrpRalpha	6.69591	0.0667498	-0.0138275	0.0348918	0.301518	0.77361	0.470148	0.548567	0.494693	0.999544
FBgn0010395	Itgbn	2.32798	0.0193518	-0.17793	-0.342707	0.951071	0.458138	0.159783	0.734386	0.383387	0.999544
FBgn0010397	LamC	6.38492	-0.285035	0.141915	0.0200356	0.00587446	0.0561564	0.778751	0.132005	0.158228	0.999544
FBgn0010398	Lrr47	2.02122	0.215958	-0.311462	-0.0842058	0.296108	0.0528887	0.586014	0.545704	0.155685	0.999544
FBgn0010406	RNaseX25	5.49109	-0.156379	0.0703719	0.0827392	0.0378703	0.200244	0.134747	0.278411	0.261525	0.999544
FBgn0010408	RpS9	10.5391	0.00489042	-0.00875457	0.0734173	0.948939	0.878932	0.2095	0.734247	0.525552	0.999544
FBgn0010409	RpL18A	10.5564	-0.0441628	-0.0826606	0.0935531	0.638353	0.248344	0.193225	0.655744	0.287648	0.999544
FBgn0010411	RpS18	10.5726	0.0314124	-0.0525985	0.076999	0.699009	0.39268	0.215056	0.677617	0.356738	0.999544
FBgn0010412	RpS19a	9.93627	-0.0588393	-0.037627	0.0768485	0.554553	0.615112	0.308799	0.63263	0.443002	0.999544
FBgn0010415	Sdc	8.24315	-0.242238	0.200213	-0.00187411	0.043992	0.028308	0.982686	0.298249	0.120394	0.999544
FBgn0010416	TH1	4.87304	-0.0173841	-0.122087	-0.034636	0.791223	0.0201909	0.485408	0.702939	0.10699	0.999544
FBgn0010417	Taf6	4.67178	-0.0613788	-0.0573387	-0.010152	0.4358	0.335074	0.8631	0.596553	0.33173	0.999544
FBgn0010421	TfIIFbeta	3.45261	0.116847	-0.254803	-0.0351513	0.341412	0.00998876	0.701481	0.56363	0.0759872	0.999544
FBgn0010422	TfIIS	4.58608	0.115153	-0.105915	-0.0757198	0.434903	0.341491	0.494322	0.596553	0.334432	0.999544
FBgn0010423	TpnC47D	5.51143	-0.468912	-0.207669	-0.0544283	0.0230165	0.164703	0.710108	0.23254	0.240501	0.999544
FBgn0010424	TpnC73F	6.31042	0.920673	0.313887	0.04223	7.19e-06	0.0151705	0.72681	0.00538014	0.0955118	0.999544
FBgn0010425	epsilonTry	4.39644	-0.783422	-0.668532	2.20641	0.568141	0.521133	0.0426114	0.63396	0.409593	0.999544
FBgn0010431	mtrm	1.66911	1.66245	-0.97525	-0.193469	0.40341	0.518501	0.897611	0.587652	0.40825	0.999544
FBgn0010434	cora	7.59837	-0.1107	0.178171	0.00142033	0.412277	0.0874661	0.98876	0.588528	0.186949	0.999544
FBgn0010435	emp	8.64505	-0.155492	0.194094	0.0602094	0.229032	0.0520872	0.53097	0.517118	0.155116	0.999544
FBgn0010438	mtSSB	3.51736	0.192937	-0.226693	-0.154803	0.538979	0.340707	0.512986	0.627944	0.334338	0.999544
FBgn0010441	pll	4.67231	-0.124615	-0.00147631	-0.0418883	0.179543	0.98279	0.542212	0.487972	0.551927	0.999544
FBgn0010452	trn	1.58308	0.520485	0.369538	0.167376	0.191791	0.219184	0.572646	0.495975	0.271006	0.999544
FBgn0010470	Fkbp14	8.04731	-0.255484	-0.0572193	-0.0684868	0.186781	0.68906	0.632261	0.49318	0.468835	0.999544
FBgn0010473	tutl	3.05779	0.361155	0.425723	-0.113708	0.0450816	0.00311376	0.385714	0.301292	0.0477307	0.999544
FBgn0010482	l(2)01289	6.72603	-0.00773142	0.00989723	-0.0656587	0.957846	0.928351	0.552384	0.735417	0.537164	0.999544
FBgn0010488	NAT1	9.14353	-0.0725955	0.149601	-0.00467559	0.390335	0.0251736	0.940896	0.582714	0.115537	0.999544
FBgn0010497	dmGlut	4.52736	0.6147	-0.656563	0.00601025	0.19967	0.0739757	0.986459	0.501408	0.175906	0.999544
FBgn0010501	Dcp-1	3.14947	0.544158	-0.0259068	-0.208079	0.123143	0.920252	0.424643	0.447228	0.535539	0.999544
FBgn0010504	kermit	3.21729	0.149978	-0.200974	-0.0738861	0.422225	0.159664	0.598093	0.591442	0.236379	0.999544
FBgn0010516	wal	8.07372	-0.129298	-0.14007	0.0443666	0.277335	0.122939	0.616594	0.53852	0.214439	0.999544
FBgn0010520	Bka	3.79002	-0.0793775	-0.0348606	0.0348749	0.400492	0.621908	0.621766	0.587203	0.445531	0.999544
FBgn0010531	Ccs	4.09498	0.153879	0.000490601	0.0358004	0.0070755	0.990092	0.369247	0.143577	0.553579	0.999544
FBgn0010548	Aldh-III	8.12128	0.100417	-0.158941	-0.0693038	0.507961	0.170741	0.543386	0.617567	0.2448	0.999544
FBgn0010551	Phb2	7.3728	-0.0611877	-0.172989	-0.017083	0.406304	0.0042651	0.756403	0.587652	0.0542702	0.999544
FBgn0010583	dock	4.5578	0.151465	-0.136598	-0.0763908	0.152761	0.0896637	0.331763	0.474251	0.189431	0.999544
FBgn0010590	Prosbeta1	7.39695	-0.105805	-0.0354624	0.0254369	0.294908	0.637468	0.735037	0.545704	0.451316	0.999544
FBgn0010591	Sply	7.66119	-0.309612	-0.00243431	-0.00807757	0.010972	0.977138	0.92425	0.167055	0.550771	0.999544
FBgn0010602	lwr	5.47862	0.229809	-0.251955	-0.0287424	0.0866479	0.0158095	0.768549	0.392116	0.0973188	0.999544
FBgn0010607	l(2)05714	3.36576	0.0758084	-0.171757	-0.147635	0.595935	0.119582	0.177872	0.643808	0.21197	0.999544
FBgn0010611	Hmgs	8.19375	-0.204109	0.198093	0.0168566	0.299789	0.184534	0.908292	0.548082	0.25322	0.999544
FBgn0010612	ATPsynG	7.74274	0.179673	-0.105518	0.073198	0.0750521	0.158955	0.322902	0.371079	0.235929	0.999544
FBgn0010620	CG10939	4.97072	0.128481	0.0564633	-0.0121625	0.280409	0.524822	0.890569	0.538628	0.410946	0.999544
FBgn0010621	CCT5	7.08851	-0.0180282	-0.103767	-0.0459488	0.904874	0.365044	0.686132	0.727872	0.344251	0.999544
FBgn0010622	DCTN3-p24	4.10128	-0.107787	0.0354963	-0.00152027	0.129009	0.497473	0.976697	0.452222	0.400853	0.999544
FBgn0010638	Sec61beta	6.62145	0.0650821	-0.156222	-0.00696063	0.357631	0.00656709	0.894992	0.572049	0.0643524	0.999544
FBgn0010651	MFS14	8.27802	-0.526682	0.342573	0.0969649	0.00642412	0.0162717	0.469722	0.136477	0.0989827	0.999544
FBgn0010660	Nup214	5.08487	0.102435	-0.0603761	-0.025821	0.511326	0.606247	0.825107	0.618646	0.440319	0.999544
FBgn0010741	Pfdn2	5.6607	0.117565	-0.0954091	0.0210929	0.262022	0.227444	0.786323	0.533504	0.275955	0.999544
FBgn0010747	Srp54k	6.45598	0.013133	-0.0487853	0.00587742	0.818722	0.264358	0.891532	0.708936	0.297084	0.999544
FBgn0010750	atms	4.47189	0.155619	-0.0866315	0.0148417	0.236642	0.377904	0.878897	0.522801	0.350661	0.999544
FBgn0010762	simj	5.39781	0.0184892	0.0445009	-0.0837504	0.877568	0.623034	0.35822	0.722941	0.445915	0.999544
FBgn0010768	sqz	2.22577	0.44393	-0.138548	0.120139	0.0197488	0.309809	0.37712	0.215931	0.319993	0.999544
FBgn0010770	ppan	3.92874	0.186235	-0.107831	0.0174424	0.371156	0.489858	0.910593	0.574372	0.397934	0.999544
FBgn0010772	Xe7	5.84049	0.152217	0.0587203	-0.12014	0.600141	0.787646	0.58254	0.644721	0.498629	0.999544
FBgn0010774	Ref1	6.72296	-0.13148	-0.0727749	-0.0421679	0.119677	0.246455	0.497531	0.444343	0.286662	0.999544
FBgn0010786	l(3)02640	8.24338	-0.0219266	0.0805857	0.11867	0.805399	0.236008	0.0864569	0.705267	0.28122	0.999544
FBgn0010803	TrpRS	4.63877	0.0616298	-0.185449	-0.0480563	0.558227	0.0264134	0.544163	0.632979	0.117154	0.999544
FBgn0010808	Chchd3	6.34648	0.108805	-0.0423508	0.0850445	0.209267	0.510497	0.192757	0.509015	0.405231	0.999544
FBgn0010812	unc-45	4.92864	0.0217633	0.00543967	-0.0324541	0.80109	0.933262	0.618311	0.705035	0.538851	0.999544
FBgn0010825	Gug	6.45808	0.0584303	0.0347599	-0.0708374	0.641962	0.71292	0.455529	0.657141	0.47617	0.999544
FBgn0010830	l(3)04053	4.24487	0.113569	-0.179208	-0.0228051	0.315369	0.0422942	0.786565	0.554683	0.140928	0.999544
FBgn0010877	l(3)05822	5.3871	0.121729	-0.0681097	-0.0994956	0.294265	0.432898	0.255629	0.545393	0.372922	0.999544
FBgn0010894	sinu	4.06765	0.0378962	0.178461	0.032413	0.688998	0.0186482	0.649448	0.674464	0.104182	0.999544
FBgn0010905	Spn	4.92814	0.169887	-0.255519	-0.16065	0.51193	0.196209	0.411136	0.618646	0.259499	0.999544
FBgn0010909	msn	6.8138	0.0733591	0.137948	-0.0660845	0.597139	0.19372	0.527472	0.644117	0.257966	0.999544
FBgn0010926	l(3)07882	5.07843	0.125969	-0.032629	-0.0261781	0.396531	0.76878	0.813483	0.584752	0.493738	0.999544
FBgn0011016	SsRbeta	6.50538	0.102082	-0.167925	-0.0238929	0.180521	0.00618601	0.671336	0.487972	0.0638356	0.999544
FBgn0011020	Sas-4	1.96348	0.381056	-0.603432	0.0348187	0.388579	0.0801308	0.916711	0.58218	0.180674	0.999544
FBgn0011202	dia	5.37529	0.0545958	0.0108562	-0.0189687	0.490283	0.854618	0.749043	0.614061	0.519755	0.999544
FBgn0011204	cue	8.27615	0.334531	0.0599834	0.0639811	0.0204808	0.55826	0.532554	0.219876	0.424446	0.999544
FBgn0011205	fbl	9.14995	0.0569465	0.116324	0.0761805	0.616176	0.181189	0.375722	0.648942	0.251615	0.999544
FBgn0011206	bol	4.36506	0.0174658	0.245307	0.0192929	0.896991	0.0228607	0.84933	0.727028	0.110796	0.999544
FBgn0011207	pelo	5.46021	0.0551222	-0.0698865	-0.0383831	0.358223	0.127986	0.394548	0.57226	0.217976	0.999544
FBgn0011211	blw	10.8107	0.0673199	-0.0385945	0.0660358	0.495227	0.602512	0.375684	0.615343	0.439115	0.999544
FBgn0011217	eff	8.38071	0.0394946	0.00539959	-0.0412098	0.464957	0.893757	0.313583	0.604408	0.528811	0.999544
FBgn0011224	heph	4.67766	0.406644	-0.0457198	-0.0485686	0.145981	0.823974	0.813216	0.46678	0.510945	0.999544
FBgn0011225	jar	7.00543	-0.182554	-0.0131549	-0.0082094	0.20316	0.901213	0.938248	0.50396	0.530689	0.999544
FBgn0011227	ox	5.60356	0.0384964	-0.237506	0.0508256	0.730003	0.00888792	0.545926	0.686551	0.0730948	0.999544
FBgn0011230	poe	8.40066	-0.12676	0.0416796	-0.0204208	0.0742487	0.421832	0.692291	0.368601	0.367988	0.999544
FBgn0011232	scat	4.46359	0.0857526	-0.144798	-0.100435	0.475206	0.117153	0.270278	0.607436	0.210196	0.999544
FBgn0011236	ken	4.75619	0.269187	0.0640624	-0.0238995	0.0314654	0.47548	0.789048	0.259882	0.390443	0.999544
FBgn0011259	Sema1a	2.57247	1.12727	-0.0511982	-0.168082	0.0530922	0.903138	0.689986	0.319672	0.531432	0.999544
FBgn0011260	Sema2a	5.75413	0.135769	-0.029136	-0.0268438	0.279149	0.754688	0.773401	0.538628	0.488827	0.999544
FBgn0011272	RpL13	10.4629	-0.0752553	-0.0753185	0.0907316	0.396994	0.262834	0.180095	0.584799	0.296436	0.999544
FBgn0011274	Dif	7.11779	-0.21105	0.180958	0.0382253	0.151832	0.104781	0.724345	0.473931	0.200583	0.999544
FBgn0011280	Obp19d	1.94299	-0.108614	-0.057417	0.109706	0.758403	0.829202	0.680628	0.695401	0.51262	0.999544
FBgn0011284	RpS4	11.239	-0.099398	-0.0625717	0.0885414	0.313383	0.397366	0.234796	0.553786	0.358975	0.999544
FBgn0011286	RyR	6.89724	-0.00718939	0.17456	0.0280545	0.959336	0.110093	0.791618	0.735525	0.204771	0.999544
FBgn0011288	Snap25	1.45422	0.170795	0.43554	-0.134197	0.63329	0.118065	0.621392	0.654253	0.210764	0.999544
FBgn0011289	TfIIA-L	5.85246	0.126826	-0.0806869	-0.0170992	0.249348	0.328015	0.834095	0.527742	0.328455	0.999544
FBgn0011290	Taf12	4.27114	0.0421519	-0.150983	-0.0229079	0.519847	0.00500433	0.641346	0.621695	0.0588691	0.999544
FBgn0011291	Taf11	2.84668	0.0373107	-0.115865	-0.0909282	0.687726	0.107091	0.200998	0.674129	0.202764	0.999544
FBgn0011296	l(2)efl	6.22106	-0.271041	-0.259119	-0.147304	0.141375	0.0654662	0.282544	0.465334	0.167179	0.999544
FBgn0011297	Alg3	3.75125	0.066884	-0.173639	0.059156	0.573192	0.061117	0.50863	0.636044	0.162855	0.999544
FBgn0011300	babo	6.23006	0.0222487	0.111751	-0.0280634	0.752273	0.0441103	0.597471	0.693216	0.143007	0.999544
FBgn0011305	Rsf1	4.51684	-0.038725	0.0635689	0.022138	0.616322	0.279408	0.703113	0.648942	0.304561	0.999544
FBgn0011327	Uch-L5	5.01396	0.306112	-0.0924108	-0.0921971	0.0351308	0.377827	0.378912	0.270978	0.350661	0.999544
FBgn0011335	vers	3.63971	0.0253322	-0.093011	0.029759	0.731594	0.104111	0.593158	0.686915	0.19993	0.999544
FBgn0011336	Stt3B	6.57674	0.0444895	-0.067316	-0.00306562	0.499861	0.181479	0.950479	0.615983	0.251722	0.999544
FBgn0011361	ND-ACP	7.21527	0.258242	-0.0333898	0.0701796	0.00270681	0.568218	0.23611	0.0895377	0.428084	0.999544
FBgn0011455	ND-SGDH	7.3471	0.202423	-0.132465	0.0829633	0.0541069	0.090721	0.279976	0.323691	0.190061	0.999544
FBgn0011474	PR-Set7	4.38944	0.151702	-0.223877	-0.0622281	0.517089	0.209911	0.7231	0.62068	0.266873	0.999544
FBgn0011476	l(3)neo43	2.66642	0.0167776	-0.27971	-0.0598466	0.897661	0.00867434	0.544527	0.727028	0.0721296	0.999544
FBgn0011481	Ssdp	5.63054	0.213957	0.0616382	-0.120832	0.213005	0.628357	0.346275	0.509015	0.447849	0.999544
FBgn0011509	SrpRbeta	5.28823	-0.0410989	-0.0116425	0.000726588	0.437604	0.768784	0.985349	0.596894	0.493738	0.999544
FBgn0011555	thetaTry	0.396664	0.139038	1.46758	0.724616	0.946144	0.375545	0.65957	0.733741	0.34946	0.999544
FBgn0011566	Smyd3	3.79443	0.124402	-0.0490544	0.0823217	0.0988241	0.376568	0.14401	0.41228	0.350024	0.999544
FBgn0011570	cpb	5.22064	-0.0150399	0.0232965	-0.0476711	0.873279	0.742888	0.503718	0.721448	0.485381	0.999544
FBgn0011573	Cdc37	5.40719	0.0528047	-0.131382	-0.0623143	0.400321	0.00952978	0.192193	0.587203	0.0744674	0.999544
FBgn0011576	Cyp4d2	4.79702	-0.116699	-0.181967	-0.0996751	0.429027	0.109018	0.370315	0.594289	0.204032	0.999544
FBgn0011581	Ms	2.6693	0.396464	0.262415	0.0758912	0.0871646	0.1304	0.654135	0.393372	0.220298	0.999544
FBgn0011584	Trp1	7.51094	-0.198711	0.108222	-0.000173937	0.0484822	0.144904	0.998085	0.309657	0.228445	0.999544
FBgn0011586	e(r)	5.14214	0.0561642	-0.153396	-0.0493658	0.598184	0.0650014	0.538608	0.644151	0.166739	0.999544
FBgn0011591	fng	3.90889	-0.0067746	0.288169	0.0517188	0.928824	3.9e-05	0.369514	0.730545	0.00505259	0.999544
FBgn0011592	fra	3.78074	1.0981	0.200348	-0.111511	0.000158028	0.283997	0.547375	0.0210163	0.30705	0.999544
FBgn0011603	ine	5.61311	0.208024	0.380582	0.119118	0.230953	0.00660089	0.358709	0.518258	0.0645535	0.999544
FBgn0011604	Iswi	4.65152	0.213075	-0.182978	-0.0968408	0.401544	0.339543	0.610577	0.587243	0.333803	0.999544
FBgn0011606	Klp3A	2.24646	0.73483	-0.632152	-0.0992257	0.38511	0.325151	0.875935	0.581045	0.327064	0.999544
FBgn0011638	La	6.77882	0.0364968	-0.0473508	-0.0183393	0.738987	0.56659	0.823797	0.689626	0.427846	0.999544
FBgn0011640	lark	6.68956	-0.24219	0.00138549	-0.0404294	0.10533	0.989876	0.711604	0.422617	0.553579	0.999544
FBgn0011642	Zyx	5.99902	-0.0766986	0.0928553	-0.0929195	0.648953	0.465566	0.465261	0.660257	0.385888	0.999544
FBgn0011648	Mad	5.69087	-0.0862513	-0.0510312	0.0291357	0.259274	0.372441	0.608417	0.531648	0.347985	0.999544
FBgn0011655	Med	4.79814	-0.0689372	-0.0912275	-0.00415434	0.362537	0.116085	0.94132	0.573282	0.209436	0.999544
FBgn0011656	Mef2	5.87238	0.061887	0.0604135	0.0069669	0.513238	0.397864	0.921707	0.618839	0.359173	0.999544
FBgn0011659	Mlh1	2.09601	0.479952	-0.312657	-0.0747906	0.230457	0.298475	0.801339	0.518075	0.314688	0.999544
FBgn0011660	Pms2	1.98451	0.490249	-0.530427	-0.128865	0.383447	0.216845	0.760381	0.580027	0.269331	0.999544
FBgn0011661	Moe	7.89662	0.0639131	0.0956008	-0.00258331	0.466963	0.155163	0.968642	0.604748	0.233309	0.999544
FBgn0011666	msi	3.51482	0.315242	-0.216583	-0.125441	0.326637	0.369895	0.601327	0.559263	0.34694	0.999544
FBgn0011672	Mvl	6.37234	-0.167244	0.0876809	-0.0273662	0.0182562	0.089641	0.585261	0.209451	0.189431	0.999544
FBgn0011674	insc	4.12373	-0.0304916	0.325537	-0.0479011	0.795543	0.00116694	0.589669	0.703901	0.028791	0.999544
FBgn0011692	pav	1.51098	1.43371	-0.377786	-0.0744864	0.324893	0.728155	0.94529	0.558624	0.480405	0.999544
FBgn0011695	EbpIII	7.0456	-0.126415	-0.00789178	0.0361153	0.379018	0.941307	0.736473	0.577441	0.540614	0.999544
FBgn0011701	repo	1.85404	-0.0496749	0.215653	0.0269662	0.745166	0.0713222	0.815017	0.690976	0.173414	0.999544
FBgn0011703	RnrL	3.59398	0.791196	-0.626169	-0.236825	0.361431	0.338569	0.714928	0.573063	0.333655	0.999544
FBgn0011704	RnrS	3.94865	0.895259	-0.553715	-0.114678	0.24702	0.33944	0.841595	0.526568	0.333803	0.999544
FBgn0011705	rost	3.48374	0.214471	-0.22865	-0.0493912	0.364689	0.203475	0.779797	0.573708	0.263554	0.999544
FBgn0011708	Syx5	6.20869	-0.0252762	-0.0249639	-0.0050928	0.658651	0.562629	0.90564	0.663772	0.426218	0.999544
FBgn0011710	Septin1	4.76709	0.164222	-0.137923	-0.122497	0.449656	0.399529	0.453555	0.600533	0.359674	0.999544
FBgn0011715	Snr1	4.11184	0.12557	-0.320192	-0.0382424	0.467402	0.0200193	0.767614	0.604816	0.10699	0.999544
FBgn0011722	Tig	7.81889	-0.0811195	-0.0537755	-0.0742644	0.629616	0.670736	0.557853	0.653647	0.462288	0.999544
FBgn0011725	twin	5.69614	0.100583	-0.132543	-0.067923	0.45555	0.196941	0.502536	0.601674	0.259542	0.999544
FBgn0011726	tsr	7.59228	0.00505485	-0.136876	-0.03901	0.959941	0.0809209	0.607521	0.735525	0.181263	0.999544
FBgn0011737	Wee1	3.81926	0.0460768	-0.184481	-0.0611695	0.755234	0.107131	0.583335	0.694517	0.202764	0.999544
FBgn0011739	wts	5.66696	0.0866489	-0.00755602	-0.0319289	0.396495	0.921088	0.67608	0.584752	0.535539	0.999544
FBgn0011740	alpha-Man-IIa	4.52897	0.0254008	-0.139222	-0.0288534	0.768763	0.0410796	0.657588	0.698193	0.138679	0.999544
FBgn0011741	Arp6	4.17234	0.0727322	-0.111624	0.0488727	0.381736	0.0822085	0.433998	0.579456	0.182527	0.999544
FBgn0011742	Arp2	5.70061	0.0668944	-0.104958	-0.139845	0.654569	0.354445	0.220671	0.661996	0.339659	0.999544
FBgn0011745	Arp1	5.96335	-0.085443	-0.00779789	-0.0245658	0.0838918	0.828315	0.496527	0.387996	0.512412	0.999544
FBgn0011746	ana	1.16861	0.956566	0.514935	-0.115501	0.184356	0.344707	0.830546	0.491558	0.335689	0.999544
FBgn0011747	Ank	7.65027	-0.0345272	0.014868	-0.0384216	0.777489	0.871445	0.67633	0.699587	0.523609	0.999544
FBgn0011754	PhKgamma	7.25277	-0.0316283	0.0812568	-0.0560218	0.827568	0.459606	0.609002	0.708936	0.383696	0.999544
FBgn0011760	ctp	6.94559	-0.167708	0.0531363	-0.0186126	0.0408657	0.370571	0.751878	0.288443	0.346971	0.999544
FBgn0011761	dhd	5.24021	1.89256	-0.724119	-0.0650817	0.194689	0.503726	0.951834	0.49782	0.402977	0.999544
FBgn0011762	Prim1	2.46655	0.0966652	-0.240627	-0.0858427	0.690647	0.196466	0.639421	0.674686	0.259526	0.999544
FBgn0011763	Dp	6.23998	0.0840335	-0.0522555	-0.0519003	0.418753	0.502985	0.505863	0.590813	0.402741	0.999544
FBgn0011766	E2f1	6.00407	0.0408337	-0.0380088	-0.0649144	0.735476	0.6762	0.477319	0.688222	0.464349	0.999544
FBgn0011768	Fdh	7.48454	0.114508	-0.0073621	0.0498355	0.206648	0.912509	0.459759	0.506253	0.533882	0.999544
FBgn0011769	Fdx1	2.81049	0.0409587	8.45e-05	0.0666596	0.690948	0.99913	0.393368	0.674686	0.555564	0.999544
FBgn0011770	Gip	5.86469	-0.131292	-0.237852	-0.00508593	0.121713	0.000800436	0.934736	0.447097	0.0246478	0.999544
FBgn0011771	Hem	4.91484	-0.0703834	8.21e-05	0.00211187	0.177381	0.998296	0.956204	0.487972	0.555356	0.999544
FBgn0011774	Irbp	3.22504	0.118237	-0.217859	-0.0772891	0.49018	0.0999058	0.548728	0.614061	0.196434	0.999544
FBgn0011785	BRWD3	6.05234	-0.100987	7.79e-05	-0.0367827	0.243186	0.999031	0.567553	0.525373	0.555564	0.999544
FBgn0011787	mRpL12	4.825	0.103366	-0.273232	-0.0389616	0.446342	0.0122953	0.701459	0.599714	0.0848763	0.999544
FBgn0011802	Gem3	3.24387	0.259703	-0.25762	-0.120329	0.367163	0.238094	0.576914	0.574279	0.282597	0.999544
FBgn0011817	nmo	4.91225	-0.155606	0.113616	-0.135454	0.340076	0.354295	0.271381	0.56363	0.339583	0.999544
FBgn0011818	oaf	4.61601	0.138837	-0.0841573	-0.0720265	0.369103	0.467941	0.533811	0.574372	0.386974	0.999544
FBgn0011824	CG4038	4.91122	0.13752	-0.0324805	0.00308086	0.4111	0.795019	0.980325	0.588114	0.500988	0.999544
FBgn0011826	Pp2B-14D	6.25879	-0.0595776	-0.125534	-0.0562271	0.408768	0.0275351	0.302271	0.587652	0.119471	0.999544
FBgn0011828	Pxn	5.77078	-0.0494641	0.177135	0.0963616	0.654746	0.0419849	0.252951	0.661996	0.14054	0.999544
FBgn0011832	Ser12	-2.13792	-0.74512	0.980164	-0.557088	0.740378	0.571602	0.747218	0.690528	0.42942	0.999544
FBgn0011834	Ser6	0.576575	-0.322702	-0.253819	1.32644	0.788368	0.787992	0.168729	0.702102	0.498629	0.999544
FBgn0011836	Taf2	4.23583	-0.0364346	-0.024499	-0.022358	0.772806	0.796395	0.813823	0.698586	0.501138	0.999544
FBgn0011837	Tis11	6.64348	-0.0264553	0.204368	-0.00740682	0.809831	0.0202165	0.928614	0.705996	0.10699	0.999544
FBgn0012034	AcCoAS	10.2053	0.0996846	0.0832872	0.0843255	0.590746	0.550732	0.545817	0.64182	0.421077	0.999544
FBgn0012036	Aldh	8.69122	0.251775	-0.194291	0.0496676	0.103629	0.095586	0.660735	0.419706	0.193848	0.999544
FBgn0012037	Ance	6.13136	-0.167404	-0.0741324	0.0540136	0.293252	0.53287	0.648876	0.54491	0.413647	0.999544
FBgn0012042	AttA	1.07868	-1.49355	0.435278	0.122733	0.0411831	0.414684	0.816847	0.289507	0.365067	0.999544
FBgn0012051	CalpA	6.25341	-0.0774069	0.122471	0.0268905	0.458109	0.126403	0.730665	0.602655	0.216519	0.999544
FBgn0012058	Cdc27	5.05474	0.0854424	-0.0754842	-0.0473816	0.341525	0.265921	0.481263	0.56363	0.298083	0.999544
FBgn0013263	Trl	6.47659	-0.00315852	0.172219	-0.0402505	0.966024	0.00489945	0.47326	0.736137	0.0588681	0.999544
FBgn0013269	Fkbp39	6.33234	0.32769	-0.132019	-0.0765542	0.366898	0.626749	0.77756	0.574279	0.447322	0.999544
FBgn0013272	Gp150	9.93905	-0.0682581	0.133878	0.0571812	0.526387	0.10733	0.481081	0.622912	0.202827	0.999544
FBgn0013276	Hsp70Ab	1.59813	0.441924	-0.00175544	-0.59738	0.517163	0.997297	0.255892	0.62068	0.555356	0.999544
FBgn0013278	Hsp70Bb	0.472469	-0.0418864	0.63238	0.122595	0.915687	0.0447864	0.684194	0.729756	0.144159	0.999544
FBgn0013303	Nca	4.65878	0.0837419	-0.0645904	-0.000645738	0.280251	0.268702	0.991053	0.538628	0.300013	0.999544
FBgn0013305	Nmda1	7.37386	-0.402807	0.103252	-0.0403359	0.00900071	0.340329	0.707085	0.156463	0.334266	0.999544
FBgn0013307	Odc1	8.22469	0.137906	-0.137223	0.1158	0.51798	0.394269	0.471155	0.620802	0.357292	0.999544
FBgn0013308	Odc2	1.08481	-0.432189	-0.327381	-0.00905031	0.409519	0.409127	0.981653	0.587652	0.363467	0.999544
FBgn0013323	Ptth	2.32326	-0.590518	0.14386	0.0881664	0.0188498	0.421992	0.621051	0.213257	0.368017	0.999544
FBgn0013325	RpL11	10.6484	-0.0125587	-0.0918368	0.0738548	0.885187	0.169546	0.265726	0.724647	0.244033	0.999544
FBgn0013334	Sap47	5.82817	0.132377	0.122522	-0.00270614	0.181541	0.103716	0.970448	0.489093	0.199604	0.999544
FBgn0013342	nSyb	3.38636	0.229116	0.352095	-0.0689424	0.347687	0.0631106	0.705406	0.566209	0.164916	0.999544
FBgn0013343	Syx1A	2.13478	-0.247509	-0.13565	-0.113128	0.414749	0.551969	0.619427	0.589271	0.42136	0.999544
FBgn0013347	TfIIA-S	5.03899	0.117336	-0.00719478	0.0587568	0.0540511	0.869893	0.189533	0.323691	0.523609	0.999544
FBgn0013348	TpnC41C	4.32684	-0.0261678	0.0808637	0.142551	0.887715	0.563464	0.312282	0.725388	0.426717	0.999544
FBgn0013432	bcn92	4.07211	-0.00507928	-0.103403	-0.0527625	0.942332	0.060253	0.323405	0.732986	0.1621	0.999544
FBgn0013435	Cdc2rk	2.82051	-0.147727	-0.109544	-0.0685254	0.205105	0.211994	0.430018	0.504451	0.267127	0.999544
FBgn0013467	igl	1.55469	-0.176056	0.588888	-0.0862015	0.519532	0.00867674	0.677788	0.621559	0.0721296	0.999544
FBgn0013469	klu	3.56546	0.165337	0.286369	0.0970394	0.0997303	0.000665231	0.194339	0.41228	0.0222986	0.999544
FBgn0013531	MED20	1.74003	0.152066	-0.411348	0.0742228	0.450812	0.0117842	0.625605	0.600533	0.0836151	0.999544
FBgn0013548	l(2)dtl	3.01246	0.408913	-0.547671	-0.0735	0.263374	0.0539396	0.787357	0.533554	0.1568	0.999544
FBgn0013563	Pex1	4.74912	-0.149505	0.0158565	-0.0209026	0.138551	0.830562	0.777967	0.463012	0.512945	0.999544
FBgn0013576	mtd	7.51316	0.00866971	-0.0359722	-0.0335363	0.924411	0.601934	0.626616	0.730545	0.43894	0.999544
FBgn0013673	mt:ATPase8	1.99079	-0.12918	-0.668204	0.169045	0.776308	0.0638559	0.626669	0.699476	0.165738	0.999544
FBgn0013674	mt:CoI	12.8239	0.140923	0.219513	0.0110843	0.499942	0.169518	0.943495	0.615983	0.244033	0.999544
FBgn0013675	mt:CoII	10.785	0.203137	0.27063	0.00690183	0.336049	0.0954609	0.964985	0.562416	0.193848	0.999544
FBgn0013676	mt:CoIII	12.2643	0.144991	0.324613	-0.0268178	0.512132	0.0598758	0.871402	0.618646	0.161858	0.999544
FBgn0013680	mt:ND2	5.48577	0.098372	-0.0795902	0.230134	0.699661	0.678358	0.237039	0.677775	0.465495	0.999544
FBgn0013681	mt:ND3	5.29351	-0.0265759	0.101812	0.0824373	0.90288	0.536129	0.615884	0.727422	0.415004	0.999544
FBgn0013683	mt:ND4L	1.44727	-0.497506	-0.691739	0.593061	0.405403	0.139084	0.201815	0.587652	0.226316	0.999544
FBgn0013685	mt:ND6	2.62022	-0.115488	-0.620904	0.215811	0.749482	0.0317207	0.434218	0.69166	0.126064	0.999544
FBgn0013717	not	3.84796	-0.0363904	-0.196708	-0.0623907	0.764715	0.0404105	0.497273	0.696776	0.138163	0.999544
FBgn0013718	nuf	6.45711	-0.166935	-0.0213694	-0.0418566	0.0499135	0.72769	0.496893	0.311353	0.480356	0.999544
FBgn0013720	pck	4.48954	0.0950775	0.15306	0.0763097	0.161728	0.00520383	0.13675	0.478055	0.0589688	0.999544
FBgn0013726	pnut	5.29776	0.168419	-0.148328	-0.0970293	0.403941	0.330025	0.521447	0.587652	0.32924	0.999544
FBgn0013732	sced	2.30885	0.9345	-0.529357	-0.358323	0.28163	0.417194	0.581354	0.539782	0.366083	0.999544
FBgn0013733	shot	8.95718	-0.0968623	0.200491	-0.00109943	0.502073	0.0736332	0.99188	0.615983	0.175568	0.999544
FBgn0013746	alien	5.46283	0.0342768	-0.026174	-0.00934474	0.613376	0.608152	0.854383	0.647915	0.440977	0.999544
FBgn0013749	Arf102F	6.4552	-0.0123813	0.0180337	-0.0323099	0.849684	0.71403	0.512886	0.714622	0.476372	0.999544
FBgn0013750	Arf51F	5.97647	0.0106316	-0.0200788	-0.000840372	0.854158	0.645204	0.984588	0.715263	0.454092	0.999544
FBgn0013753	Bgb	2.49862	-0.00249215	-0.320042	-0.0851991	0.986673	0.00869825	0.452077	0.742205	0.0721296	0.999544
FBgn0013756	Mtor	5.75342	0.184905	-0.193324	-0.16629	0.415808	0.261464	0.332312	0.589734	0.295541	0.999544
FBgn0013759	CASK	5.3083	0.45402	0.0244935	-0.086083	0.011285	0.844869	0.493768	0.169039	0.516633	0.999544
FBgn0013762	Cdk5	4.42588	-0.167727	0.0609305	0.0272368	0.0400838	0.303978	0.642691	0.286389	0.317542	0.999544
FBgn0013763	Idgf6	9.79295	-0.176411	-0.0756793	0.0567544	0.211487	0.470958	0.587793	0.509015	0.388103	0.999544
FBgn0013764	Chi	4.81011	0.0947803	-0.109532	-0.00905409	0.147928	0.0310138	0.850822	0.46838	0.125512	0.999544
FBgn0013765	cnn	5.58479	-0.205746	-0.0725054	-0.0394164	0.29134	0.617713	0.785725	0.544745	0.44404	0.999544
FBgn0013770	Cp1	10.7293	-0.14641	0.277717	0.0852731	0.273349	0.00962193	0.39395	0.537512	0.0746347	0.999544
FBgn0013771	Cyp6a9	6.46892	-0.584634	0.115753	-0.00232522	0.000648795	0.308707	0.983492	0.0427062	0.319856	0.999544
FBgn0013772	Cyp6a8	3.53633	-1.08641	-0.162022	-0.0580227	0.0153422	0.608421	0.854051	0.195203	0.441031	0.999544
FBgn0013773	Cyp6a22	5.29127	-0.186869	-0.0457933	0.0619665	0.0871669	0.565983	0.438751	0.393372	0.427559	0.999544
FBgn0013799	Deaf1	4.65638	0.061644	-0.0673298	-0.0221445	0.371362	0.198809	0.667365	0.574413	0.260441	0.999544
FBgn0013810	Dhc36C	0.0754	0.837875	0.473399	0.0138993	0.19519	0.330567	0.976963	0.498226	0.329443	0.999544
FBgn0013811	Dhc62B	1.35683	-0.324807	0.0733585	0.155755	0.29792	0.752648	0.50509	0.547032	0.488148	0.999544
FBgn0013812	Dhc93AB	1.88902	-0.144481	0.489051	-0.237594	0.69828	0.0932372	0.403359	0.677611	0.192539	0.999544
FBgn0013949	Elal	6.73191	-0.341176	-0.258234	0.028108	0.0661187	0.0646569	0.834398	0.353411	0.166468	0.999544
FBgn0013953	Esp	2.72806	0.393215	0.110642	-0.00228454	0.213071	0.636793	0.992201	0.509015	0.45119	0.999544
FBgn0013954	Fkbp12	7.91865	0.0650447	-0.153027	0.0193568	0.357857	0.00756528	0.71391	0.57226	0.0681898	0.999544
FBgn0013972	Gycalpha99B	1.26265	0.14718	0.0805491	-0.228905	0.632316	0.728256	0.328073	0.653869	0.480405	0.999544
FBgn0013973	Gycbeta100B	0.906073	0.0650268	0.385743	-0.150122	0.787672	0.0437384	0.414336	0.702102	0.142925	0.999544
FBgn0013981	His4r	8.32129	0.0189829	-0.0107741	0.0903613	0.829621	0.871027	0.182014	0.708936	0.523609	0.999544
FBgn0013983	imd	5.34261	-0.0355953	0.238299	0.10512	0.813773	0.0452433	0.359505	0.70735	0.144767	0.999544
FBgn0013987	MAPk-Ak2	6.54818	-0.101601	0.0159241	-0.0412026	0.0799723	0.706054	0.333499	0.379566	0.473982	0.999544
FBgn0013995	Calx	5.13394	0.335674	-0.114602	-0.0289462	0.0422385	0.338813	0.807257	0.293344	0.33376	0.999544
FBgn0013997	Nrx-IV	5.82612	-0.0366917	0.209548	0.0482653	0.700931	0.00726562	0.503412	0.678654	0.0676513	0.999544
FBgn0014000	Hf	7.37734	-0.270939	-0.174308	0.0145924	0.102876	0.159831	0.904208	0.4177	0.236555	0.999544
FBgn0014006	Ask1	5.9395	-0.125034	0.0418158	-0.0134661	0.0625003	0.392818	0.781596	0.346168	0.356738	0.999544
FBgn0014007	Ptp69D	5.10729	0.0531954	-0.176755	-0.0697038	0.657499	0.0596055	0.442109	0.663462	0.161715	0.999544
FBgn0014009	Rab2	7.09225	-0.225219	0.161585	0.0463887	0.0239996	0.0305623	0.514253	0.23518	0.12441	0.999544
FBgn0014010	Rab5	7.83807	-0.166023	0.0996081	-0.000567647	0.0703921	0.143779	0.993188	0.362048	0.228161	0.999544
FBgn0014011	Rac2	5.94466	-0.125436	0.149577	0.00925422	0.204827	0.0502145	0.899257	0.504451	0.152444	0.999544
FBgn0014018	Rel	7.87935	-0.155431	0.307539	0.103808	0.351957	0.0202278	0.407735	0.568656	0.10699	0.999544
FBgn0014020	Rho1	8.86104	-0.163208	0.0521797	-0.0218713	0.080641	0.445042	0.747556	0.38089	0.378229	0.999544
FBgn0014022	Rlb1	3.38432	0.0821021	-0.1	-0.0643053	0.591744	0.388065	0.576987	0.64243	0.354543	0.999544
FBgn0014023	mRpL47	4.33037	0.124281	-0.136167	-0.0146162	0.133088	0.0332049	0.809762	0.456278	0.127985	0.999544
FBgn0014024	Rnp4F	5.05255	0.227166	-0.0425481	-0.0838279	0.0113098	0.499125	0.189379	0.169039	0.401209	0.999544
FBgn0014026	RpL7A	11.3945	-0.0645911	-0.069108	0.0808318	0.460292	0.296758	0.224364	0.602655	0.313858	0.999544
FBgn0014028	SdhB	7.36246	0.116942	-0.112883	0.04201	0.342157	0.22599	0.647591	0.56363	0.275372	0.999544
FBgn0014029	Septin2	5.03438	-0.0466621	-0.0618162	-0.0737604	0.625168	0.392385	0.309138	0.651651	0.356738	0.999544
FBgn0014031	Agxt	8.34744	-0.202335	0.0638421	0.0409448	0.160507	0.548874	0.699958	0.476747	0.420452	0.999544
FBgn0014032	Sptr	4.17687	-0.19215	-0.0205961	-0.0175987	0.0796238	0.796067	0.825191	0.379294	0.501138	0.999544
FBgn0014033	Sr-CI	5.10148	-0.314476	-0.00448541	0.0196785	0.0892182	0.973434	0.883866	0.398217	0.549959	0.999544
FBgn0014037	Su(Tpl)	7.31195	-0.00429197	0.142534	-0.00505321	0.959628	0.0339235	0.936873	0.735525	0.129421	0.999544
FBgn0014073	Tie	4.07722	0.176721	0.537367	0.208695	0.154064	5.04e-06	0.0303174	0.475452	0.00182053	0.999544
FBgn0014075	Uggt	6.17247	-0.0517868	-0.0763382	-0.0441325	0.615381	0.328867	0.569661	0.648688	0.32876	0.999544
FBgn0014076	Vm32E	-1.64238	4.04707	-2.05143	-0.965439	0.437113	0.607108	0.808342	0.596688	0.440549	0.999544
FBgn0014092	CG4278	4.19068	0.159197	-0.113577	-0.00688803	0.136209	0.156736	0.92998	0.459906	0.234041	0.999544
FBgn0014127	barr	2.77397	0.407251	-0.595437	-0.0108685	0.273679	0.0410041	0.968778	0.537512	0.138679	0.999544
FBgn0014133	bif	5.29151	0.400996	-0.400741	-0.20549	0.31955	0.189863	0.495239	0.556334	0.256551	0.999544
FBgn0014135	bnl	3.62536	-0.0524088	0.22467	0.0979593	0.838914	0.254118	0.614809	0.711823	0.290685	0.999544
FBgn0014141	cher	8.72193	-0.241338	0.108134	0.0784929	0.131687	0.361427	0.505771	0.455251	0.342653	0.999544
FBgn0014163	fax	7.34176	0.068975	0.23655	-0.00986761	0.353317	0.00026656	0.85861	0.569266	0.0128277	0.999544
FBgn0014184	Oda	9.65838	-0.00556945	0.125317	0.0486284	0.961156	0.154718	0.573347	0.735525	0.233309	0.999544
FBgn0014189	Hel25E	6.23166	0.277574	-0.0999131	-0.0749798	0.0890561	0.404139	0.529859	0.398029	0.36135	0.999544
FBgn0014269	prod	4.09484	0.127046	-0.189403	-0.00230948	0.155248	0.00795713	0.971976	0.475452	0.0695593	0.999544
FBgn0014340	mof	3.02116	0.0921872	-0.206602	0.0495522	0.453259	0.03312	0.591417	0.601041	0.127861	0.999544
FBgn0014342	mia	0.990544	-0.235423	0.00395524	0.273525	0.34122	0.982936	0.148681	0.56363	0.551927	0.999544
FBgn0014343	mirr	4.67343	0.0309641	0.191538	0.112313	0.788089	0.0356068	0.203057	0.702102	0.13211	0.999544
FBgn0014366	noi	4.30956	0.0770399	-0.179158	-0.0445945	0.47705	0.0357083	0.583539	0.607736	0.132365	0.999544
FBgn0014380	RhoL	4.53784	0.146941	0.21125	0.0970019	0.322554	0.0660382	0.38431	0.557693	0.167698	0.999544
FBgn0014388	sty	5.0126	-0.0282682	0.178063	-0.0791382	0.85056	0.124606	0.485569	0.714622	0.214828	0.999544
FBgn0014391	sun	7.08984	0.150225	-0.179621	0.0558566	0.103461	0.0130328	0.410456	0.419544	0.0868592	0.999544
FBgn0014396	tim	7.54116	0.0245906	0.422916	-0.0744203	0.926599	0.0444458	0.711405	0.730545	0.143589	0.999544
FBgn0014411	Vps26	5.96574	0.0187326	-0.0446286	-0.026876	0.674207	0.190923	0.425234	0.667619	0.25673	0.999544
FBgn0014417	CG13397	5.36016	-0.0547304	-0.246474	-0.0135343	0.788109	0.117513	0.929563	0.702102	0.210255	0.999544
FBgn0014427	CG11899	7.37962	-0.0357865	0.1392	0.164587	0.784652	0.166618	0.104823	0.701388	0.241885	0.999544
FBgn0014454	Acp1	6.48929	1.53388	1.18636	-0.225522	0.00316661	0.00254393	0.52475	0.0955344	0.0424899	0.999544
FBgn0014455	Ahcy	8.11534	0.118608	-0.105147	0.053771	0.406385	0.32942	0.615145	0.587652	0.328975	0.999544
FBgn0014469	Cyp4e2	6.64677	-0.138949	-0.101156	-0.0325187	0.358037	0.373578	0.77307	0.57226	0.348512	0.999544
FBgn0014857	His3.3A	7.03684	-0.120893	0.161777	0.0627778	0.19471	0.0263815	0.366082	0.49782	0.117154	0.999544
FBgn0014859	Hr38	2.23989	0.16868	0.527841	0.308993	0.349624	0.000683164	0.0307947	0.567473	0.0225882	0.999544
FBgn0014861	Mcm2	3.09262	0.897671	-0.53922	-0.0382207	0.31184	0.418776	0.953953	0.553678	0.366572	0.999544
FBgn0014863	Mlp84B	8.29761	-0.183554	-0.0820774	0.0661439	0.199746	0.440561	0.533288	0.501408	0.375932	0.999544
FBgn0014865	Mtk	1.99995	-0.792792	0.0614637	0.0815111	0.157317	0.881772	0.843676	0.475649	0.526034	0.999544
FBgn0014868	Ost48	5.70116	0.080936	-0.169874	-0.0434504	0.423682	0.0329369	0.566747	0.591687	0.127785	0.999544
FBgn0014869	Pglym78	7.73371	0.0683494	-0.0953054	0.0725134	0.419832	0.141757	0.258757	0.591442	0.227923	0.999544
FBgn0014870	Psi	5.13686	0.0349816	0.00559491	-0.0303622	0.785574	0.953848	0.75372	0.701651	0.544015	0.999544
FBgn0014877	Roe1	5.27199	0.162758	-0.149072	-0.000913989	0.0150149	0.00400537	0.984489	0.192989	0.0529016	0.999544
FBgn0014879	Set	4.63679	0.288228	-0.26297	-0.113892	0.309631	0.22048	0.590534	0.552651	0.272217	0.999544
FBgn0014903	CG14630	4.49897	0.352552	-0.0273489	0.0456636	0.154834	0.880714	0.802245	0.475452	0.525812	0.999544
FBgn0014906	Hydr2	5.07396	-0.309422	0.0339595	-0.24157	0.208143	0.851761	0.192162	0.508093	0.518786	0.999544
FBgn0014930	CG2846	4.52253	-0.137793	-0.00875611	-0.0200061	0.224217	0.916875	0.811615	0.513876	0.534873	0.999544
FBgn0014931	CG2678	2.81084	0.364907	-0.248438	-0.0144714	0.168637	0.211821	0.940985	0.48337	0.267127	0.999544
FBgn0015000	betaggt-I	4.92237	-0.122606	-0.0638222	-0.033411	0.0676881	0.197483	0.494008	0.355721	0.259841	0.999544
FBgn0015010	Ag5r	9.06511	0.0167142	0.660461	0.358501	0.947596	0.00202986	0.0711184	0.734031	0.0384507	0.999544
FBgn0015011	AhcyL2	2.80536	-0.585802	-0.0157056	0.114242	0.0170572	0.927744	0.511527	0.203953	0.537004	0.999544
FBgn0015019	CCT3	6.62251	0.208047	-0.161488	-0.0782207	0.325913	0.311214	0.620665	0.559131	0.32087	0.999544
FBgn0015024	CkIalpha	7.62329	-0.124577	0.16251	-0.0669711	0.338272	0.103662	0.491689	0.562954	0.199604	0.999544
FBgn0015025	CkIIalpha-i1	2.02564	-0.0634641	0.0119527	-0.00455785	0.597846	0.894799	0.959778	0.644151	0.529093	0.999544
FBgn0015031	cype	7.26453	0.149642	-0.180684	0.082745	0.188124	0.0401677	0.329124	0.494126	0.138163	0.999544
FBgn0015033	Cyp4d8	2.48073	-0.72224	-0.104856	-0.163623	0.00118237	0.482188	0.276575	0.0571805	0.393799	0.999544
FBgn0015034	Cyp4e1	5.5968	0.385834	-0.0633511	0.11219	0.0596287	0.669189	0.451249	0.337207	0.46168	0.999544
FBgn0015035	Cyp4e3	4.97968	1.3177	0.587147	0.451719	0.0546556	0.242224	0.36522	0.324406	0.284954	0.999544
FBgn0015036	Cyp4ae1	3.67003	0.159957	0.00225005	0.0623144	0.435476	0.988292	0.685002	0.596553	0.55331	0.999544
FBgn0015037	Cyp4p1	5.2316	-2.05371	0.278901	0.310189	1.65e-05	0.335294	0.285085	0.00827298	0.33173	0.999544
FBgn0015038	Cyp9b1	2.45324	-0.0200645	-0.246785	-0.163102	0.935414	0.194975	0.38664	0.731891	0.258886	0.999544
FBgn0015039	Cyp9b2	5.23004	-0.421937	-0.193893	-0.108014	0.0820646	0.278006	0.54192	0.384733	0.303578	0.999544
FBgn0015040	Cyp9c1	3.37229	-0.179157	-0.0216849	-0.0666521	0.233817	0.845823	0.551493	0.520918	0.516659	0.999544
FBgn0015075	Ddx1	4.35313	0.0082852	-0.0756649	-0.0151168	0.927684	0.277121	0.825906	0.730545	0.303157	0.999544
FBgn0015218	eIF4E1	7.77955	0.140883	-0.0925269	-0.0190228	0.164319	0.22243	0.798756	0.480179	0.273558	0.999544
FBgn0015221	Fer2LCH	10.6946	-0.37056	0.11283	0.0311459	0.00436756	0.21269	0.726578	0.113926	0.267127	0.999544
FBgn0015222	Fer1HCH	10.8626	-0.38167	0.164792	0.0238128	0.00280296	0.0669002	0.783339	0.0895377	0.168782	0.999544
FBgn0015229	glec	6.02433	0.304279	0.201234	-0.0234861	0.0503021	0.0824207	0.833863	0.312485	0.182527	0.999544
FBgn0015239	Hr78	5.66962	-0.267334	-0.0216843	-0.0630169	0.0434777	0.819642	0.50943	0.297348	0.50926	0.999544
FBgn0015240	Hr96	4.5736	0.102617	-0.141056	-0.0428181	0.235678	0.0363711	0.506131	0.522206	0.132831	0.999544
FBgn0015245	Hsp60A	8.34518	0.0602021	-0.0905636	-0.0263947	0.600176	0.299113	0.759572	0.644721	0.314908	0.999544
FBgn0015247	Diap2	6.14898	0.0481305	0.00397105	0.0159574	0.345648	0.916814	0.675266	0.564946	0.534873	0.999544
FBgn0015268	Nap1	9.45939	-0.0478981	-0.0478595	0.0395664	0.625977	0.51834	0.592801	0.652069	0.40825	0.999544
FBgn0015269	Nf1	5.11052	-0.380571	0.136434	0.0248006	0.000671226	0.0732612	0.735813	0.0435353	0.175322	0.999544
FBgn0015270	Orc2	0.103465	1.26754	-1.17661	-0.0210563	0.393161	0.304774	0.98517	0.583563	0.318086	0.999544
FBgn0015271	Orc5	1.17613	0.775842	-0.43834	-0.0738877	0.176223	0.307547	0.86187	0.487972	0.319266	0.999544
FBgn0015277	Pi3K59F	5.13708	-0.0601644	0.0235306	-0.017408	0.599171	0.784224	0.839409	0.644313	0.497865	0.999544
FBgn0015278	Pi3K68D	5.82216	-0.0564631	0.00906954	0.0159839	0.449514	0.870958	0.7748	0.600533	0.523609	0.999544
FBgn0015279	Pi3K92E	5.74194	0.104634	0.0944122	0.00559592	0.331342	0.246232	0.944363	0.560516	0.286609	0.999544
FBgn0015282	Rpt2	7.42623	-0.0304771	-0.0655462	-0.000375703	0.707088	0.288235	0.99508	0.680376	0.309464	0.999544
FBgn0015283	Rpn10	7.40492	-0.0770593	-0.0377833	-0.0400739	0.383451	0.568173	0.545134	0.580027	0.428084	0.999544
FBgn0015286	Rala	5.41892	-0.177172	0.0401288	-0.0841039	0.0532738	0.545286	0.211157	0.32026	0.41889	0.999544
FBgn0015288	RpL22	10.1963	0.00240323	0.0176326	0.0839785	0.977343	0.782022	0.1957	0.739455	0.497323	0.999544
FBgn0015295	Shark	4.61446	0.138076	-0.0690832	-0.0113304	0.18079	0.368146	0.881606	0.488241	0.34581	0.999544
FBgn0015296	Shc	4.4974	-0.0960586	0.0584365	-0.0261683	0.363462	0.461081	0.740117	0.573477	0.384003	0.999544
FBgn0015298	Srp19	4.22938	0.1201	-0.0843516	-0.0315783	0.123036	0.148686	0.581078	0.447228	0.229919	0.999544
FBgn0015299	Ssb-c31a	3.07071	0.137187	-0.260431	-0.0869004	0.463746	0.0734362	0.53719	0.604029	0.17542	0.999544
FBgn0015320	Ubc2	5.65107	0.0382186	0.000108155	-0.100191	0.565713	0.99827	0.0542632	0.633203	0.555356	0.999544
FBgn0015321	Ubc4	5.84014	0.133268	-0.138154	-0.00755953	0.142016	0.0475105	0.909679	0.465334	0.148896	0.999544
FBgn0015331	abs	3.81934	0.0307191	0.0618864	0.0272569	0.730436	0.360378	0.684787	0.686646	0.342442	0.999544
FBgn0015338	CG5861	4.85486	0.0246003	-0.0816865	-0.0302337	0.773476	0.211697	0.638796	0.698586	0.267127	0.999544
FBgn0015351	Mettl4	1.83578	0.0436667	-0.101588	-0.0273865	0.772601	0.376213	0.809917	0.698586	0.349828	0.999544
FBgn0015359	CG2034	4.10731	0.15161	-0.196264	-0.0415804	0.30611	0.0851029	0.70631	0.549929	0.184056	0.999544
FBgn0015360	oxt	5.06167	0.0871165	-0.153385	-0.00600395	0.323763	0.0273278	0.92719	0.558412	0.119018	0.999544
FBgn0015371	chn	3.85264	0.467689	-0.477797	-0.0168975	0.181741	0.0747699	0.947887	0.489288	0.176618	0.999544
FBgn0015372	RabX1	4.73268	-0.135852	0.0928548	-0.00972411	0.205271	0.24843	0.902344	0.504451	0.287648	0.999544
FBgn0015376	cutlet	1.39828	0.433671	-0.429385	-0.054483	0.50358	0.38267	0.911045	0.616608	0.352763	0.999544
FBgn0015379	dod	3.73259	0.130629	-0.111698	-0.0494387	0.329086	0.26904	0.620814	0.560448	0.300013	0.999544
FBgn0015380	drl	1.34589	0.460018	0.266599	0.146249	0.0167663	0.0598008	0.288325	0.201585	0.161746	0.999544
FBgn0015391	glu	3.23344	0.533344	-0.550185	-0.114626	0.334525	0.191117	0.781387	0.561555	0.25673	0.999544
FBgn0015396	jumu	2.90298	0.72529	-0.232786	-0.307927	0.35878	0.693765	0.602955	0.57226	0.47016	0.999544
FBgn0015399	kek1	2.32182	0.944676	0.421034	-0.144172	0.056778	0.250948	0.690362	0.329809	0.288757	0.999544
FBgn0015402	ksr	4.85404	0.0735282	-0.0170134	-0.00138121	0.275798	0.734418	0.977999	0.537512	0.482571	0.999544
FBgn0015477	Rme-8	5.93414	0.0173879	0.014436	-0.0687066	0.855121	0.840348	0.342416	0.715829	0.515517	0.999544
FBgn0015509	Cul1	7.05811	-0.0405809	-0.156279	-0.0484016	0.606104	0.0136501	0.415841	0.645125	0.0898983	0.999544
FBgn0015513	mbc	6.82981	0.0159333	-0.0805169	-0.0803381	0.911663	0.458979	0.459965	0.72945	0.383676	0.999544
FBgn0015520	nonA-l	2.08334	0.152643	-0.423682	-0.0504639	0.719342	0.194794	0.874946	0.683728	0.258877	0.999544
FBgn0015521	RpS21	9.07316	-0.00797341	-0.0836543	0.0766631	0.931223	0.236267	0.276543	0.730954	0.281322	0.999544
FBgn0015522	olf186-M	6.80734	-0.300669	0.00222974	0.14111	0.0266746	0.981555	0.152909	0.243492	0.551852	0.999544
FBgn0015527	peng	5.74578	0.132481	-0.0545673	0.0159936	0.392175	0.637546	0.889918	0.583239	0.451316	0.999544
FBgn0015544	spag	3.43276	0.224747	-0.232436	-0.0664737	0.204585	0.0862399	0.612835	0.504451	0.185306	0.999544
FBgn0015546	spel1	4.60283	0.159263	0.0990368	0.0645094	0.163334	0.246094	0.445968	0.479374	0.286609	0.999544
FBgn0015553	tos	2.39749	0.844158	-0.708204	-0.0917329	0.284317	0.237844	0.876569	0.54147	0.282369	0.999544
FBgn0015558	tty	4.80479	-0.241666	-0.0290059	-0.0227839	0.458953	0.905394	0.925616	0.602655	0.532244	0.999544
FBgn0015568	alpha-Est1	6.03012	-0.0384313	-0.19425	-0.00958345	0.746702	0.0386772	0.914667	0.690987	0.135473	0.999544
FBgn0015569	alpha-Est10	4.29405	-0.329262	-0.221001	-0.251513	0.132343	0.177397	0.127001	0.456278	0.248838	0.999544
FBgn0015570	alpha-Est2	6.65137	-0.101749	-0.174769	-0.00573764	0.575291	0.207516	0.966389	0.636937	0.265555	0.999544
FBgn0015571	alpha-Est3	5.70531	-0.263236	0.0371079	-0.00545293	0.0106576	0.606818	0.939542	0.164597	0.440466	0.999544
FBgn0015572	alpha-Est4	1.37753	-0.0977263	-0.0237052	-0.22223	0.60532	0.867783	0.128428	0.645125	0.523271	0.999544
FBgn0015575	alpha-Est7	7.15338	-0.44547	-0.274206	-0.0288168	0.00806621	0.0263189	0.8049	0.149685	0.117154	0.999544
FBgn0015576	alpha-Est8	4.93291	0.00486905	-0.225135	-0.169783	0.976647	0.0823096	0.183724	0.739419	0.182527	0.999544
FBgn0015577	alpha-Est9	6.30863	-0.000767511	-0.0375978	-0.111229	0.995585	0.719041	0.292601	0.744368	0.477824	0.999544
FBgn0015582	dare	4.52667	-0.0596832	-0.0432055	-0.00748392	0.283723	0.301939	0.856423	0.541227	0.316897	0.999544
FBgn0015589	Apc	4.97361	-0.125457	0.20268	-0.0935425	0.359921	0.056993	0.364229	0.572908	0.159016	0.999544
FBgn0015591	AstA	1.27907	-0.0599257	-0.0131688	0.298813	0.904852	0.972255	0.433212	0.727872	0.549612	0.999544
FBgn0015600	toc	6.43263	0.153066	0.132729	0.0731391	0.198782	0.140997	0.409286	0.501395	0.227623	0.999544
FBgn0015602	BEAF-32	4.51161	0.077425	-0.0814497	-0.000953979	0.340051	0.186476	0.987406	0.56363	0.254347	0.999544
FBgn0015609	CadN	2.30233	0.644167	0.361932	-0.20881	0.0288002	0.097152	0.328545	0.25362	0.194561	0.999544
FBgn0015614	CanB2	7.25232	0.0229455	0.0447497	0.00302346	0.753714	0.419052	0.956137	0.69404	0.366721	0.999544
FBgn0015615	SMC3	4.48105	0.0961135	-0.202052	-0.0824062	0.55144	0.105017	0.497893	0.631661	0.200877	0.999544
FBgn0015618	Cdk8	1.48643	-0.0405582	-0.289634	-0.111578	0.850407	0.0847667	0.494329	0.714622	0.183689	0.999544
FBgn0015621	Clp	2.36181	0.216941	-0.335153	-0.0642682	0.368686	0.0734465	0.722118	0.574372	0.17542	0.999544
FBgn0015622	Cnx99A	6.7625	-0.116218	-0.136837	-0.0831299	0.0724259	0.00731144	0.086624	0.366573	0.0678495	0.999544
FBgn0015623	Cpr	12.1799	-0.0503714	0.0983913	0.0915101	0.6693	0.273107	0.307188	0.665924	0.30157	0.999544
FBgn0015625	CycB3	2.27683	1.0122	-1.01411	-0.212161	0.451937	0.326328	0.83558	0.600792	0.32784	0.999544
FBgn0015663	Ugt36A1	3.62498	-0.358658	-0.0550661	-0.0930072	0.0171369	0.60467	0.384552	0.204156	0.439896	0.999544
FBgn0015664	Dref	4.78922	0.0789808	-0.171519	-0.00131391	0.530707	0.0793824	0.988892	0.624709	0.179717	0.999544
FBgn0015714	Cyp6a17	4.50348	-1.70992	0.356077	0.110356	0.00905178	0.437502	0.808667	0.156463	0.37444	0.999544
FBgn0015737	Hmu	8.01197	-0.0702014	0.0363039	0.0245298	0.365522	0.531994	0.672081	0.573708	0.413516	0.999544
FBgn0015754	Lis-1	7.13464	-0.173793	0.0361196	0.0182448	0.0110515	0.452184	0.702788	0.16779	0.380795	0.999544
FBgn0015756	RpL9	10.6981	-0.0204535	-0.0866299	0.0939322	0.822239	0.213796	0.178964	0.708936	0.26775	0.999544
FBgn0015765	p38a	4.33236	-0.109573	-0.0321306	0.0323	0.120314	0.535517	0.533387	0.44529	0.414857	0.999544
FBgn0015766	Msr-110	9.04826	-0.274936	0.136529	0.0992499	0.0486588	0.182398	0.327828	0.309657	0.252204	0.999544
FBgn0015772	Nak	6.04865	-0.000340192	0.0814487	0.0376494	0.996816	0.212292	0.558802	0.744426	0.267127	0.999544
FBgn0015773	NetA	2.71035	0.0733364	0.0732192	0.168205	0.655268	0.5548	0.181992	0.661996	0.422857	0.999544
FBgn0015774	NetB	1.45805	-0.0643519	0.14824	0.120499	0.686327	0.224399	0.320652	0.673975	0.274589	0.999544
FBgn0015776	nrv1	7.64554	-0.0406597	0.0556385	0.0339246	0.650937	0.41308	0.616058	0.660523	0.364653	0.999544
FBgn0015777	nrv2	5.5302	-0.0344903	0.249025	0.0581347	0.7518	0.0054965	0.480642	0.693063	0.0606757	0.999544
FBgn0015778	rin	7.02923	0.292062	-0.00549521	-0.0923684	0.197831	0.973821	0.582509	0.500653	0.550049	0.999544
FBgn0015781	P5cr	4.36084	0.119351	-0.170948	0.0460845	0.142657	0.0083631	0.443789	0.465334	0.0710632	0.999544
FBgn0015789	Rab10	7.6741	-0.0902129	0.00107964	-0.000873664	0.181956	0.982714	0.986011	0.489391	0.551927	0.999544
FBgn0015790	Rab11	7.84754	-0.0994799	-0.0367804	-0.0277496	0.104693	0.414782	0.537056	0.421655	0.365087	0.999544
FBgn0015791	Rab14	6.13503	-0.0771644	0.0353291	0.0138015	0.358817	0.574313	0.82579	0.57226	0.430129	0.999544
FBgn0015793	Rab19	4.14184	-0.0607576	0.123411	0.0087911	0.621444	0.190059	0.924166	0.650283	0.256601	0.999544
FBgn0015794	Rab18	6.11982	-0.107707	0.043026	0.0132391	0.304021	0.582046	0.865099	0.549268	0.432302	0.999544
FBgn0015795	Rab7	8.27513	-0.239682	0.0345378	0.0121352	0.0441661	0.686872	0.887187	0.29856	0.468362	0.999544
FBgn0015797	Rab6	6.32628	-0.11658	0.0197586	0.0219735	0.210916	0.774408	0.749976	0.509015	0.494996	0.999544
FBgn0015799	Rbf	5.29461	0.0530325	-0.272295	-0.0494128	0.754261	0.0415221	0.698469	0.69404	0.139324	0.999544
FBgn0015801	Reg-5	5.45126	-0.10038	0.0361984	0.0523578	0.532334	0.763953	0.664387	0.625332	0.492048	0.999544
FBgn0015803	RtGEF	5.41944	-0.127911	0.0968232	0.0232324	0.110316	0.108312	0.691975	0.432539	0.203574	0.999544
FBgn0015805	HDAC1	5.72396	0.133698	-0.218201	-0.0581513	0.367119	0.0581653	0.599904	0.574279	0.160722	0.999544
FBgn0015808	ScpX	7.30095	-0.030047	0.017557	-0.0148213	0.78431	0.831624	0.857533	0.701388	0.513275	0.999544
FBgn0015818	Spx	3.81715	0.192337	-0.218903	0.0229769	0.264839	0.0975634	0.857619	0.534482	0.194854	0.999544
FBgn0015828	TfIIEalpha	4.44935	0.110328	-0.227617	-0.0383163	0.452959	0.0477819	0.727759	0.600967	0.149547	0.999544
FBgn0015829	TfIIEbeta	3.82468	-0.0401759	0.00720417	0.0349914	0.567192	0.891192	0.508438	0.633552	0.52824	0.999544
FBgn0015834	eIF3i	8.07666	0.0095309	-0.00836492	0.0727759	0.900522	0.884083	0.212614	0.727302	0.526511	0.999544
FBgn0015838	Vang	4.27877	0.308144	0.00748921	-0.0930673	0.125195	0.959426	0.529105	0.450491	0.545905	0.999544
FBgn0015872	Drip	5.15675	-0.0132766	0.419448	0.266335	0.934881	0.00213681	0.0381797	0.731877	0.0393119	0.999544
FBgn0015903	apt	3.92013	0.599026	-0.280901	-0.13935	0.168675	0.384935	0.664421	0.48337	0.353676	0.999544
FBgn0015905	ast	4.04815	0.112441	-0.0582063	0.0282967	0.246217	0.42139	0.694272	0.526568	0.367773	0.999544
FBgn0015924	crq	7.09428	-0.326416	0.0778523	-0.0450007	0.00131949	0.257186	0.508409	0.0609828	0.292816	0.999544
FBgn0015925	csul	3.59062	0.129018	-0.185712	-0.0675959	0.586219	0.30225	0.704348	0.640159	0.316949	0.999544
FBgn0015926	dah	0.287721	1.44835	-1.97268	-0.255421	0.469244	0.222004	0.872249	0.604919	0.273242	0.999544
FBgn0015929	dpa	3.52783	0.671266	-0.3579	-0.0631432	0.33249	0.490347	0.90263	0.560594	0.397971	0.999544
FBgn0015949	hrg	5.5283	0.121338	0.0749318	-0.0222235	0.264051	0.357133	0.782916	0.533554	0.341173	0.999544
FBgn0016013	Faa	4.8339	-0.060203	0.151678	0.113944	0.700986	0.20605	0.338373	0.678654	0.264827	0.999544
FBgn0016031	lama	6.68116	-0.0141944	-0.0741448	-0.142114	0.895811	0.367652	0.0916533	0.726612	0.34581	0.999544
FBgn0016032	lbm	3.19611	0.0723602	0.0352603	0.0360826	0.632004	0.756247	0.750762	0.653869	0.489373	0.999544
FBgn0016034	mael	1.61939	1.25201	-0.606534	-0.215173	0.32178	0.523053	0.82004	0.557243	0.410402	0.999544
FBgn0016038	Vsp37A	4.43832	0.159749	-0.135486	0.0256158	0.0335297	0.0180036	0.634063	0.264451	0.1027	0.999544
FBgn0016041	Tom40	6.25994	0.194168	-0.160546	-0.033799	0.216103	0.175581	0.77111	0.509977	0.24765	0.999544
FBgn0016047	nompA	1.17014	0.46858	-0.284055	0.239287	0.262891	0.36812	0.447152	0.533545	0.34581	0.999544
FBgn0016053	pgc	1.91842	1.77182	-0.743914	-0.0795839	0.340745	0.594868	0.954485	0.56363	0.436537	0.999544
FBgn0016054	phr6-4	2.2305	0.593964	-0.211426	-0.157206	0.205708	0.544441	0.651619	0.505131	0.418506	0.999544
FBgn0016059	Sema1b	6.35592	0.105948	0.0325657	-0.0120872	0.182976	0.580131	0.836836	0.49081	0.431802	0.999544
FBgn0016061	side	2.36902	0.144629	0.296961	-0.127541	0.45131	0.0486162	0.379939	0.600597	0.150855	0.999544
FBgn0016070	smg	6.8906	0.414633	-0.434391	-0.0763974	0.274106	0.13258	0.786202	0.537512	0.221594	0.999544
FBgn0016075	vkg	9.55675	-0.0545908	0.0997761	-0.00124528	0.672513	0.309259	0.989755	0.667022	0.319993	0.999544
FBgn0016076	vri	6.61395	-0.126787	0.2021	0.0341673	0.525247	0.185144	0.819312	0.622912	0.253649	0.999544
FBgn0016078	wun	5.11872	0.0787	0.199346	0.0608904	0.459968	0.0188821	0.447554	0.602655	0.104885	0.999544
FBgn0016081	fry	6.46783	-0.0976974	0.170812	-0.0484014	0.436374	0.0788352	0.606935	0.596553	0.17964	0.999544
FBgn0016119	ATPsynCF6	7.68472	0.189519	-0.174092	0.0772546	0.099223	0.0472236	0.361379	0.41228	0.148341	0.999544
FBgn0016120	ATPsynD	8.03413	0.156063	-0.179428	0.0616117	0.170719	0.0415026	0.465443	0.485218	0.139324	0.999544
FBgn0016122	Acer	8.56159	-0.300484	-0.188189	-0.0731699	0.0632974	0.117851	0.533556	0.346558	0.210591	0.999544
FBgn0016123	Alp4	5.34398	0.57281	-0.482077	-0.540312	0.13454	0.0962098	0.0642754	0.457826	0.194025	0.999544
FBgn0016126	CaMKI	9.26091	-0.130329	0.154853	0.00791052	0.454533	0.241972	0.951589	0.601562	0.284904	0.999544
FBgn0016131	Cdk4	3.91864	0.514985	0.132984	0.0196197	0.0637071	0.510182	0.922226	0.346558	0.405113	0.999544
FBgn0016641	PTP-ER	5.24737	0.0649996	-0.0968328	0.012934	0.33048	0.0613835	0.794904	0.560448	0.162855	0.999544
FBgn0016660	H15	1.97487	0.0901241	0.4755	0.0496986	0.601816	0.00127503	0.703968	0.644743	0.0299381	0.999544
FBgn0016672	Ipp	4.72892	0.179746	-0.0551406	-0.0755016	0.0267969	0.344233	0.199164	0.243548	0.335624	0.999544
FBgn0016675	Lectin-galC1	7.90348	0.446384	-0.0955155	0.00554316	0.0559623	0.572179	0.973755	0.327103	0.429597	0.999544
FBgn0016684	NaPi-T	3.01667	0.491447	-0.592092	-0.887704	0.572658	0.373798	0.187247	0.635952	0.34865	0.999544
FBgn0016685	Nlp	6.83015	0.212752	-0.103543	-0.0436104	0.316481	0.514273	0.782711	0.554699	0.406809	0.999544
FBgn0016687	Nurf-38	8.28907	0.120052	-0.0815846	0.0724921	0.168121	0.211426	0.26508	0.48337	0.267127	0.999544
FBgn0016691	ATPsynO	8.04139	0.226251	-0.136433	0.0602469	0.0572359	0.122161	0.485382	0.330903	0.214221	0.999544
FBgn0016693	Past1	7.37184	-0.117664	0.0203107	0.0575858	0.225716	0.777668	0.426307	0.51394	0.496101	0.999544
FBgn0016694	Pdp1	7.57685	0.00806644	0.237486	0.00247773	0.954518	0.0341063	0.981425	0.735052	0.129455	0.999544
FBgn0016696	Pitslre	6.63496	0.0317868	0.0125261	-0.0899218	0.871739	0.932603	0.545416	0.720724	0.538744	0.999544
FBgn0016697	Prosalpha5	7.62933	0.0184182	-0.0456743	-0.00631275	0.826805	0.4732	0.920576	0.708936	0.389096	0.999544
FBgn0016698	Ptpa	4.08426	0.135786	-0.0183632	0.0243545	0.107974	0.766288	0.693646	0.427993	0.492917	0.999544
FBgn0016701	Rab4	6.04063	0.0124655	-0.00439524	0.0108993	0.88261	0.944825	0.863775	0.724218	0.541538	0.999544
FBgn0016715	Reg-2	4.86356	-0.302788	-0.121654	0.0367601	0.04694	0.273432	0.737573	0.305747	0.30157	0.999544
FBgn0016726	RpL29	9.46866	-0.0187997	-0.0695011	0.0585453	0.861632	0.395527	0.473127	0.717557	0.35786	0.999544
FBgn0016754	sba	5.33487	0.360536	0.241575	-0.0268879	0.00805529	0.0165825	0.775817	0.149685	0.0992583	0.999544
FBgn0016756	Usp47	7.94628	-0.0738727	0.120249	0.029203	0.446617	0.107651	0.687864	0.599714	0.203039	0.999544
FBgn0016762	angel	2.51105	0.141265	0.0403874	0.0618559	0.219047	0.635957	0.469973	0.511014	0.451065	0.999544
FBgn0016794	dos	6.54149	-0.203317	0.153381	-0.00108119	0.271881	0.270681	0.993718	0.537512	0.300543	0.999544
FBgn0016797	fz2	4.58854	-0.0204339	0.152389	0.00108108	0.81498	0.0281798	0.986865	0.707654	0.120394	0.999544
FBgn0016917	Stat92E	8.16578	0.0140627	0.0232388	0.0320213	0.894237	0.770478	0.687934	0.726	0.493957	0.999544
FBgn0016926	Pino	9.96264	0.0723211	0.0838527	0.0759253	0.576519	0.391759	0.437383	0.637072	0.356642	0.999544
FBgn0016930	Dyrk2	4.84695	0.0373126	0.190439	0.0247914	0.692047	0.0123392	0.726436	0.674866	0.0848763	0.999544
FBgn0016970	l(2)k10201	2.50242	0.233333	-0.211781	-0.0516786	0.156766	0.0912574	0.670873	0.475649	0.190548	0.999544
FBgn0016975	stnB	1.27032	0.0323337	0.3106	-0.151709	0.919803	0.209158	0.534046	0.730406	0.266221	0.999544
FBgn0016977	spen	7.03555	-0.0752628	0.224591	-0.0257224	0.420447	0.00357141	0.712822	0.591442	0.0507144	0.999544
FBgn0016978	snRNP-U1-70K	4.87968	-0.0127171	-0.151933	-0.0830297	0.90296	0.062813	0.296032	0.727422	0.16467	0.999544
FBgn0016983	smid	6.52921	0.0366316	-0.0510662	-0.0292404	0.77177	0.591859	0.758334	0.698586	0.435861	0.999544
FBgn0016984	sktl	5.80186	0.179985	-0.0577836	-0.0458045	0.0853872	0.450572	0.548847	0.389658	0.380538	0.999544
FBgn0017414	cag	3.12295	0.022039	-0.0201925	0.0893586	0.832917	0.797477	0.262594	0.709997	0.501409	0.999544
FBgn0017418	ari-1	6.06942	0.017981	0.119696	-0.0305883	0.864076	0.139527	0.699129	0.71838	0.22638	0.999544
FBgn0017429	CG5989	4.62181	0.13369	-0.0375303	-0.0137472	0.0732306	0.490379	0.799632	0.367856	0.397971	0.999544
FBgn0017430	Nelf-E	3.22122	0.274127	-0.188488	-0.10685	0.0384538	0.0568429	0.267012	0.280639	0.159016	0.999544
FBgn0017448	CG2187	1.80609	1.04035	-0.764862	-1.2377	0.173041	0.196466	0.0422222	0.487278	0.259526	0.999544
FBgn0017457	U2af38	4.40315	0.143207	-0.24703	-0.0528207	0.312481	0.0268815	0.617481	0.553786	0.11824	0.999544
FBgn0017482	T3dh	4.70164	-0.223618	-0.0315397	0.047491	0.0744224	0.729053	0.602593	0.368601	0.480801	0.999544
FBgn0017545	RpS3A	11.6487	-0.00180212	-0.037211	0.0701707	0.984652	0.598726	0.324854	0.741627	0.43819	0.999544
FBgn0017550	Rga	6.0401	0.112986	-0.143488	-0.0129857	0.133478	0.0152275	0.814177	0.456476	0.0957465	0.999544
FBgn0017551	Rca1	2.47385	0.505471	-0.920274	-0.0859537	0.336939	0.0286726	0.82907	0.562864	0.120763	0.999544
FBgn0017558	Pdk	8.25776	-0.199364	0.0876689	0.0289672	0.11336	0.345839	0.753294	0.436573	0.336184	0.999544
FBgn0017561	Ork1	5.60158	-0.0214921	-0.336197	-0.234802	0.937304	0.112127	0.26027	0.732462	0.206433	0.999544
FBgn0017566	ND-75	8.13695	0.11499	-0.0724573	0.0566352	0.228507	0.310889	0.426234	0.516683	0.320614	0.999544
FBgn0017567	ND-23	6.60892	0.178604	-0.127544	0.0815322	0.143443	0.163982	0.367444	0.465334	0.239995	0.999544
FBgn0017572	Mo25	5.72256	0.099151	0.00925163	-0.0324954	0.0557587	0.804708	0.388826	0.327103	0.504088	0.999544
FBgn0017577	Mcm5	2.84034	1.26631	-0.539087	0.131158	0.228009	0.492438	0.866689	0.516453	0.398801	0.999544
FBgn0017578	Max	5.16899	-0.186438	0.159498	0.0547101	0.0391003	0.0205927	0.401813	0.282612	0.107664	0.999544
FBgn0017579	RpL14	10.2819	-0.0270813	-0.061141	0.0766479	0.771888	0.38796	0.281411	0.698586	0.354543	0.999544
FBgn0017581	Lk6	10.2503	-0.0593557	0.199185	0.073134	0.526535	0.00881152	0.303358	0.622912	0.0726834	0.999544
FBgn0017590	klg	0.70209	-0.00427486	0.748484	-0.0724723	0.989454	0.005646	0.769677	0.742754	0.061529	0.999544
FBgn0019624	COX5A	8.56573	0.204282	-0.140785	0.0749451	0.0944669	0.123737	0.403543	0.406514	0.214439	0.999544
FBgn0019637	Atu	4.43497	0.140128	-0.186874	0.0362511	0.306333	0.0767715	0.722303	0.549929	0.177856	0.999544
FBgn0019644	ATPsynB	8.2743	0.170921	-0.0908651	0.093924	0.130085	0.278643	0.263208	0.454443	0.303864	0.999544
FBgn0019662	qm	4.26936	-0.00871798	-0.0312372	-0.0557144	0.892822	0.523027	0.25934	0.725762	0.410402	0.999544
FBgn0019686	lok	4.39014	0.912215	-0.396315	0.0462931	0.213719	0.467763	0.931999	0.509138	0.386917	0.999544
FBgn0019830	colt	7.13528	0.114016	-0.207643	0.0362155	0.411894	0.0550832	0.727415	0.588401	0.157637	0.999544
FBgn0019890	Smg5	7.22023	-0.0943075	0.34529	0.0471342	0.443504	0.000966989	0.609452	0.5988	0.0265535	0.999544
FBgn0019925	Surf4	7.20484	-0.0965245	-0.054501	0.0275417	0.213204	0.34659	0.631784	0.509015	0.336421	0.999544
FBgn0019929	Ser7	6.8856	-0.0891015	0.0942696	0.0576468	0.598944	0.460984	0.650862	0.644313	0.383989	0.999544
FBgn0019932	SamDC	6.04273	-0.0997381	0.0105543	-0.0306131	0.600954	0.941185	0.83062	0.644743	0.540614	0.999544
FBgn0019936	RpS20	10.1144	-0.0041623	-0.164055	0.0724369	0.966303	0.0354877	0.33367	0.736192	0.131963	0.999544
FBgn0019938	RpI1	5.69247	0.129817	0.0713177	-0.0225626	0.485275	0.609475	0.871275	0.612227	0.441213	0.999544
FBgn0019949	Cdk9	3.90641	0.000387739	0.0441535	0.0390343	0.994929	0.341247	0.399096	0.744368	0.334384	0.999544
FBgn0019952	Orct	6.77544	-0.0136409	-0.0973247	-0.00422313	0.955349	0.596638	0.98162	0.735191	0.43734	0.999544
FBgn0019957	ND-42	7.20811	0.215546	-0.0796692	0.0504698	0.0219027	0.238898	0.451372	0.227277	0.283247	0.999544
FBgn0019960	Mitofilin	7.10275	0.142117	-0.0653765	0.0398177	0.0626429	0.243515	0.473242	0.346168	0.285812	0.999544
FBgn0019968	Khc-73	6.58341	-0.0971582	0.258848	0.00583264	0.460534	0.0142171	0.952761	0.602655	0.0912825	0.999544
FBgn0019972	Drice	4.86322	0.158941	0.0182643	0.0324769	0.0660845	0.770658	0.604958	0.353411	0.493957	0.999544
FBgn0019982	Gs1l	5.7412	0.168727	-0.127839	0.0279037	0.0705881	0.0687924	0.680459	0.36277	0.171491	0.999544
FBgn0019990	Gcn2	5.10527	-0.00957905	-0.145071	-0.00626923	0.890683	0.0103734	0.904839	0.725388	0.0770553	0.999544
FBgn0020018	Ppox	4.12227	-0.0401787	-0.0501051	-0.012871	0.600748	0.388387	0.823278	0.644732	0.354607	0.999544
FBgn0020224	Cbl	5.35099	0.209484	-0.0701728	-0.116644	0.110582	0.467223	0.231679	0.432895	0.386602	0.999544
FBgn0020235	ATPsyngamma	8.55362	0.179654	-0.0983817	0.0882994	0.0951673	0.217807	0.267112	0.407653	0.269954	0.999544
FBgn0020236	ATPCL	10.2537	-0.198195	0.0679667	0.11091	0.178917	0.533536	0.313111	0.487972	0.413903	0.999544
FBgn0020238	14-3-3epsilon	8.95463	-0.00631386	-0.0253344	-0.0352138	0.921623	0.600904	0.46845	0.730545	0.438821	0.999544
FBgn0020248	stet	2.14504	1.51426	0.162347	-0.00297204	0.263836	0.872275	0.997651	0.533554	0.523798	0.999544
FBgn0020249	stck	6.56498	-0.155831	0.103741	0.0368536	0.0732369	0.110254	0.560603	0.367856	0.204771	0.999544
FBgn0020251	sfl	5.24068	-0.0527435	0.0362721	-0.0614156	0.620314	0.650554	0.445043	0.650271	0.45521	0.999544
FBgn0020255	Ran	8.43389	-0.0874128	-0.0512353	-0.0389694	0.344847	0.460052	0.573186	0.564558	0.383814	0.999544
FBgn0020257	Ppa	4.10499	-0.122344	0.095142	0.0475268	0.352187	0.336726	0.628621	0.568656	0.332716	0.999544
FBgn0020258	ppk	1.95788	-0.0519409	0.487231	0.236949	0.744252	0.000486871	0.0598849	0.690976	0.0181948	0.999544
FBgn0020261	pcm	5.47375	0.0715427	-0.0189766	-0.0113051	0.499022	0.810795	0.886543	0.615983	0.506465	0.999544
FBgn0020269	mspo	2.03568	0.0468863	0.302428	0.190338	0.741833	0.00929576	0.086798	0.690821	0.0743694	0.999544
FBgn0020270	mre11	3.30023	0.249989	-0.236935	0.0185474	0.302123	0.197187	0.91806	0.548969	0.259542	0.999544
FBgn0020272	mst	3.58828	0.0957553	-0.150259	-0.0637629	0.680976	0.39447	0.716005	0.671249	0.357321	0.999544
FBgn0020278	loco	5.14808	-0.240831	0.113119	-0.0332371	0.0485652	0.206087	0.705617	0.309657	0.264827	0.999544
FBgn0020279	lig	7.13569	0.0556207	-0.0456258	-0.0674141	0.645075	0.615723	0.459831	0.658642	0.443327	0.999544
FBgn0020294	ko	3.7206	0.247442	0.221119	-0.031768	0.0860456	0.0442843	0.762295	0.391565	0.143244	0.999544
FBgn0020299	stumps	4.63626	-0.134143	0.250451	0.0862146	0.306912	0.0164223	0.381372	0.550796	0.0992583	0.999544
FBgn0020300	geko	6.42936	-0.2917	0.314083	0.0751435	0.101405	0.0228195	0.564513	0.415083	0.110796	0.999544
FBgn0020304	drongo	7.48832	-0.0786381	0.217196	0.0221835	0.550036	0.0362544	0.822087	0.631245	0.132689	0.999544
FBgn0020305	dbe	4.06429	0.0675995	-0.118689	0.0300892	0.534809	0.155284	0.712775	0.626369	0.233309	0.999544
FBgn0020306	dom	7.90097	0.0540004	0.0241333	-0.0672082	0.66053	0.793923	0.469249	0.663847	0.500752	0.999544
FBgn0020307	dve	1.50747	-0.179729	0.345918	0.230102	0.533525	0.12191	0.296273	0.625765	0.214035	0.999544
FBgn0020309	crol	7.03286	-0.0404924	0.21077	-0.0235563	0.605626	0.00147369	0.689403	0.645125	0.0314224	0.999544
FBgn0020312	Tmtc3	4.32927	0.127941	-0.10299	-0.0737294	0.337462	0.305576	0.460688	0.562864	0.318359	0.999544
FBgn0020369	Rpt6	7.74206	-0.0319239	-0.0239853	-0.0396885	0.736882	0.737257	0.579643	0.688773	0.483521	0.999544
FBgn0020370	TppII	6.63903	0.087931	-0.0812001	-0.0523724	0.228978	0.14304	0.338047	0.517118	0.228161	0.999544
FBgn0020372	TM4SF	1.17871	0.543038	0.243428	-0.0701479	0.0751859	0.279581	0.752448	0.371459	0.304681	0.999544
FBgn0020379	Rfx	3.85268	0.0395739	-0.00466962	-0.0231526	0.692751	0.95052	0.758576	0.674869	0.543137	0.999544
FBgn0020381	Dredd	4.58482	-0.0660222	0.0625263	-0.093973	0.695612	0.622778	0.461251	0.676255	0.445797	0.999544
FBgn0020385	pug	8.81143	-0.0922536	0.0297528	0.075236	0.472201	0.756852	0.436338	0.60681	0.489568	0.999544
FBgn0020386	Pdk1	7.78003	0.192769	0.238666	0.0818449	0.0832161	0.00676348	0.317168	0.386793	0.0653545	0.999544
FBgn0020388	Gcn5	5.57676	-0.206179	-0.0458776	-0.0167803	0.0094726	0.410245	0.761729	0.1587	0.363902	0.999544
FBgn0020389	Papss	5.15285	0.102324	-0.502825	-0.134521	0.491334	0.000144213	0.234247	0.614281	0.00911741	0.999544
FBgn0020391	Nrk	1.26362	0.0519632	0.0917899	0.109372	0.734326	0.429392	0.347813	0.688091	0.371423	0.999544
FBgn0020392	Nmt	5.53901	0.161469	-0.195954	-0.0755468	0.279323	0.0872857	0.497656	0.538628	0.186645	0.999544
FBgn0020407	asun	2.69443	-0.209197	-0.266041	-0.0832048	0.110978	0.0103603	0.390736	0.43331	0.0770553	0.999544
FBgn0020412	JIL-1	5.70165	0.0189127	0.0683836	-0.0685428	0.814443	0.265849	0.264768	0.707555	0.29807	0.999544
FBgn0020414	Idgf3	7.07882	-0.307007	0.175778	0.17647	0.425332	0.542901	0.541327	0.592362	0.417784	0.999544
FBgn0020415	Idgf2	8.91614	-0.207486	0.0443114	0.118466	0.30414	0.768068	0.433216	0.549268	0.493539	0.999544
FBgn0020416	Idgf1	8.48776	-0.545635	-0.0630847	0.0563408	0.00139663	0.581004	0.621828	0.0622077	0.43199	0.999544
FBgn0020440	Fak	5.33713	0.00796922	-0.00645791	0.0173561	0.917373	0.91104	0.764169	0.729929	0.533498	0.999544
FBgn0020443	eRF3	7.39317	-0.040141	-0.0971175	-0.0465398	0.601847	0.102651	0.423389	0.644743	0.199065	0.999544
FBgn0020445	E23	3.65192	0.410667	-0.341227	-0.157184	0.24755	0.203505	0.5523	0.52701	0.263554	0.999544
FBgn0020493	Dad	6.22262	0.082753	0.216761	0.0352943	0.444516	0.0126801	0.663319	0.599267	0.0857441	0.999544
FBgn0020496	CtBP	7.34676	0.0573286	0.142244	-0.0275654	0.406704	0.0106007	0.594276	0.587652	0.0779481	0.999544
FBgn0020497	emb	6.80475	0.0380368	-0.0167593	-0.0362734	0.622888	0.772983	0.533801	0.650891	0.494475	0.999544
FBgn0020503	CLIP-190	8.01987	-0.177863	0.0963334	-0.0378563	0.269369	0.423517	0.751659	0.536217	0.368547	0.999544
FBgn0020510	Abi	5.51064	-0.256113	0.0649289	-0.0590479	0.0104563	0.356481	0.400932	0.164597	0.340737	0.999544
FBgn0020513	Paics	10.1653	-0.158088	0.306123	0.262932	0.275021	0.00860421	0.0214299	0.537512	0.0721296	0.999544
FBgn0020521	pio	6.02867	-0.0318145	0.176706	0.0838987	0.801263	0.0731399	0.381496	0.705035	0.175211	0.999544
FBgn0020545	kraken	8.05014	-0.350575	0.0658601	0.116929	0.0740742	0.644442	0.414993	0.368601	0.453953	0.999544
FBgn0020616	SA	4.27847	0.146628	-0.118527	-0.0330794	0.215709	0.184706	0.706101	0.509977	0.253241	0.999544
FBgn0020618	Rack1	11.2624	-0.0210986	-0.0943527	0.0920614	0.806817	0.155293	0.16512	0.705303	0.233309	0.999544
FBgn0020620	RN-tre	5.66594	0.0060426	0.174714	-0.028297	0.952613	0.030517	0.711914	0.734386	0.12433	0.999544
FBgn0020621	Pkn	7.54811	-0.159601	0.0138782	-0.0320083	0.194809	0.87864	0.725014	0.49782	0.525477	0.999544
FBgn0020622	Pi3K21B	5.0233	0.223385	-0.0982925	-0.102538	0.25316	0.499825	0.48169	0.528784	0.401414	0.999544
FBgn0020626	Osbp	6.38181	-0.0729243	-0.048528	0.00695398	0.300837	0.358922	0.894426	0.548353	0.341592	0.999544
FBgn0020633	Mcm7	2.71948	1.03151	-0.507853	-0.111496	0.325335	0.5183	0.886708	0.558795	0.40825	0.999544
FBgn0020647	KrT95D	5.33977	0.0218109	-0.0611696	-0.0384395	0.803735	0.358581	0.561734	0.705035	0.341521	0.999544
FBgn0020653	Trxr-1	7.73181	-0.0236528	-0.0878502	-0.032188	0.804775	0.229766	0.655361	0.705173	0.277348	0.999544
FBgn0020655	ArfGAP1	5.70601	0.0438692	-0.11234	-0.035951	0.501311	0.0294405	0.464373	0.615983	0.121781	0.999544
FBgn0020660	eIF4B	7.74663	0.0158554	-0.0491047	0.0129136	0.826056	0.36984	0.811995	0.708936	0.34694	0.999544
FBgn0020762	Atet	6.42562	-0.62044	0.370666	-0.0651687	0.00010598	0.00114294	0.518956	0.0186656	0.0283536	0.999544
FBgn0020764	Alas	8.91665	-0.0934443	0.102312	0.164169	0.472646	0.299108	0.101896	0.607039	0.314908	0.999544
FBgn0020765	Acp65Aa	7.32588	1.21244	0.905926	0.188342	0.000567741	0.000608976	0.416143	0.0403599	0.021142	0.999544
FBgn0020767	Spred	5.38623	-0.00949125	0.0928402	-0.0296762	0.885903	0.0722214	0.552504	0.724748	0.174466	0.999544
FBgn0020887	Su(z)12	4.97332	0.094598	-0.120548	-0.0658941	0.51303	0.272208	0.544536	0.618839	0.301019	0.999544
FBgn0020906	Jon25Bi	1.71056	-0.532909	-3.00059	2.39296	0.840693	0.210667	0.315011	0.712595	0.267031	0.999544
FBgn0020907	Scp2	2.43488	1.08661	-1.59838	-0.918651	0.311855	0.0624598	0.271569	0.553678	0.164187	0.999544
FBgn0020908	Scp1	5.78904	-0.0465653	0.218572	0.18577	0.839098	0.213137	0.287667	0.711823	0.267338	0.999544
FBgn0020909	Rtc1	3.66456	0.167747	-0.00672137	0.0382248	0.236632	0.948962	0.716233	0.522801	0.542641	0.999544
FBgn0020910	RpL3	11.8519	0.00713637	-0.0167757	0.0787432	0.925147	0.76932	0.177184	0.730545	0.493793	0.999544
FBgn0020912	Ptx1	0.952058	-0.153861	0.251978	-0.575884	0.807282	0.601769	0.238963	0.705377	0.43894	0.999544
FBgn0020930	Dgkepsilon	4.67681	0.0354546	-0.00412638	-0.001919	0.541337	0.924422	0.964808	0.627944	0.536459	0.999544
FBgn0021750	SerRS-m	3.79444	-0.0141044	-0.170343	-0.012588	0.84207	0.0037522	0.813287	0.713146	0.0510847	0.999544
FBgn0021760	chb	6.43809	-0.108771	0.0888384	-0.0290904	0.312881	0.2743	0.717089	0.553786	0.301705	0.999544
FBgn0021761	Nup154	5.02198	0.139872	-0.221335	-0.0672181	0.560805	0.227189	0.709649	0.633203	0.275838	0.999544
FBgn0021764	sdk	5.17751	0.253434	-0.00436947	0.0114462	0.189811	0.975557	0.936033	0.494785	0.550332	0.999544
FBgn0021765	scu	8.5161	-0.122483	-0.0576448	0.00681117	0.309741	0.522255	0.939456	0.552697	0.41021	0.999544
FBgn0021767	org-1	3.90505	-0.20704	0.212387	-0.0452663	0.215998	0.0964966	0.715034	0.509977	0.194128	0.999544
FBgn0021768	nudC	4.92805	0.0814971	-0.0976622	-0.1007	0.608164	0.416319	0.402193	0.646094	0.365658	0.999544
FBgn0021795	Tapdelta	6.73369	0.0291913	-0.182626	-0.0147108	0.742283	0.0111037	0.825578	0.690821	0.0799532	0.999544
FBgn0021796	Tor	5.90288	-0.00691527	0.0250763	-0.014426	0.892246	0.5158	0.707631	0.725619	0.407245	0.999544
FBgn0021800	Reph	4.98629	0.134057	0.0767696	-0.111349	0.422852	0.540639	0.377051	0.591471	0.416789	0.999544
FBgn0021814	Vps28	4.95652	-0.054287	0.0119188	0.0235056	0.515951	0.849015	0.707659	0.620223	0.517957	0.999544
FBgn0021825	DCTN2-p50	5.11593	-0.00412217	-0.0461096	-0.00954168	0.928341	0.18985	0.782208	0.730545	0.256551	0.999544
FBgn0021847	Ttc7	4.77048	0.0598246	-0.0795932	-0.022102	0.284647	0.0653038	0.595742	0.541672	0.167142	0.999544
FBgn0021856	l(2)k14505	4.43191	0.0417	-0.0622381	0.0243103	0.541908	0.232001	0.635978	0.627944	0.279175	0.999544
FBgn0021872	Xbp1	9.12338	-0.108175	0.0886183	0.00310759	0.310972	0.271002	0.968781	0.553678	0.30059	0.999544
FBgn0021874	Nle	4.40599	0.122995	0.0965327	0.073966	0.336986	0.317082	0.441198	0.562864	0.32418	0.999544
FBgn0021875	Zfrp8	3.98149	0.076647	-0.0153413	0.0249444	0.490903	0.853915	0.764793	0.614275	0.519577	0.999544
FBgn0021895	ytr	5.56463	0.248345	-0.0129302	-0.0222319	0.0862843	0.902302	0.832895	0.391831	0.531133	0.999544
FBgn0021906	RFeSP	7.93646	0.142123	-0.121295	0.0692882	0.22273	0.168667	0.42502	0.512962	0.24355	0.999544
FBgn0021944	Coprox	4.59706	0.0413821	-0.143776	-0.0102951	0.706553	0.0919381	0.900799	0.680376	0.19114	0.999544
FBgn0021967	ND-PDSW	6.9211	0.143359	-0.144444	0.0613766	0.133025	0.0484219	0.384501	0.456278	0.150855	0.999544
FBgn0021979	l(2)k09913	7.58134	-0.069535	-0.0199636	0.030741	0.57205	0.828783	0.739307	0.635709	0.512562	0.999544
FBgn0021995	Rs1	5.42179	0.111423	-0.00704442	0.00581724	0.474599	0.951816	0.960202	0.607229	0.543622	0.999544
FBgn0022023	eIF3h	8.18143	-0.100165	-0.011173	0.0901049	0.168234	0.834719	0.102515	0.48337	0.513627	0.999544
FBgn0022027	Vps25	3.90524	-0.0403812	-0.200103	0.0278494	0.512775	0.000230869	0.54842	0.618802	0.0116888	0.999544
FBgn0022029	l(2)k01209	5.52366	0.0481727	0.0196772	0.00602561	0.6414	0.800057	0.938139	0.656949	0.502339	0.999544
FBgn0022069	Nnp-1	5.51784	0.177356	-0.115439	-0.0761291	0.335474	0.403518	0.580017	0.561989	0.361058	0.999544
FBgn0022097	Vha36-1	6.73373	0.0136028	-0.0797917	-0.0113234	0.911882	0.392192	0.902564	0.72945	0.356738	0.999544
FBgn0022153	l(2)k05819	6.08251	-0.121687	0.117054	0.0134953	0.122519	0.0520652	0.81516	0.447228	0.155116	0.999544
FBgn0022160	Gpo1	9.88006	-0.145623	0.161507	0.0638432	0.31511	0.143847	0.555361	0.554533	0.228161	0.999544
FBgn0022213	Cse1	5.77854	0.195755	-0.232226	-0.155959	0.399964	0.189625	0.373288	0.587203	0.256551	0.999544
FBgn0022224	ubl	2.99754	0.0894503	-0.140171	-0.00935123	0.373128	0.0716329	0.900739	0.575677	0.173822	0.999544
FBgn0022238	lolal	6.43497	0.0711651	-0.00536105	-0.00218971	0.30625	0.917448	0.966228	0.549929	0.534873	0.999544
FBgn0022288	l(2)09851	5.10793	0.240183	-0.137894	-0.0191124	0.248463	0.375557	0.901395	0.527294	0.34946	0.999544
FBgn0022338	dnk	3.78458	0.279686	-0.637498	-0.170773	0.499698	0.0498122	0.584056	0.615983	0.151887	0.999544
FBgn0022343	CG3760	6.11924	0.144687	-0.110612	-0.0128939	0.161759	0.155437	0.865473	0.478055	0.233309	0.999544
FBgn0022344	CG10340	5.16625	0.115415	-0.0607315	-0.00449996	0.090517	0.228876	0.927782	0.399302	0.276656	0.999544
FBgn0022349	CG1910	6.40359	0.0877262	0.0912596	0.0109058	0.261963	0.125632	0.850924	0.533504	0.215921	0.999544
FBgn0022355	Tsf1	6.09666	-0.227971	-0.247184	-0.0709247	0.408395	0.237359	0.730824	0.587652	0.282	0.999544
FBgn0022359	Sodh-2	3.50091	0.999504	0.0841039	0.157748	0.000449946	0.650598	0.39832	0.0366513	0.45521	0.999544
FBgn0022361	Pur-alpha	5.58119	-0.043893	0.123867	-0.0522233	0.724165	0.193587	0.577638	0.685833	0.257926	0.999544
FBgn0022382	Pka-R2	5.68856	0.13559	0.27217	-0.00295987	0.241806	0.00399746	0.972484	0.524884	0.0529016	0.999544
FBgn0022699	D19B	4.20999	0.0262213	-0.0145008	0.0512255	0.629624	0.722725	0.217358	0.653647	0.479098	0.999544
FBgn0022702	Cht2	3.77195	0.393589	0.0827932	0.193045	0.0606723	0.586466	0.21127	0.340547	0.434272	0.999544
FBgn0022709	Ak1	5.69828	0.0569188	0.129515	0.152478	0.594396	0.116323	0.0672546	0.643411	0.209615	0.999544
FBgn0022710	Ac13E	5.77189	-0.185205	0.185056	-0.0643202	0.273444	0.149933	0.609402	0.537512	0.230613	0.999544
FBgn0022724	Taf8	2.33937	0.106964	-0.254025	-0.0863492	0.624839	0.132385	0.600751	0.651593	0.221594	0.999544
FBgn0022764	Sin3A	7.5092	0.0208356	0.0299367	-0.0141665	0.810283	0.647235	0.82825	0.706203	0.454732	0.999544
FBgn0022768	Pp2C1	5.39713	0.0974725	-0.137798	-0.0637806	0.383715	0.108965	0.447798	0.580164	0.204012	0.999544
FBgn0022770	Peritrophin-A	3.39106	0.472692	0.539388	0.169273	0.0127006	0.000464008	0.211889	0.180247	0.0176662	0.999544
FBgn0022774	Oat	5.91953	0.622654	-0.112204	0.0111536	0.000302498	0.317551	0.919961	0.0298674	0.324357	0.999544
FBgn0022786	Hira	3.3598	0.109175	-0.504541	-0.126104	0.633313	0.0071044	0.46674	0.654253	0.0672949	0.999544
FBgn0022787	Hel89B	6.09684	-0.158348	0.22683	-0.00364185	0.224877	0.0264529	0.969907	0.51394	0.117203	0.999544
FBgn0022800	Cad96Ca	3.84999	0.0281793	0.321678	0.0860377	0.866585	0.0171038	0.497952	0.719285	0.0996871	0.999544
FBgn0022893	Df31	7.07056	0.386224	-0.0393027	-0.0703766	0.176781	0.85209	0.738698	0.487972	0.518921	0.999544
FBgn0022935	D19A	4.20985	0.0482988	-0.0768037	-0.0191567	0.592861	0.263786	0.777579	0.642725	0.296784	0.999544
FBgn0022936	CycH	2.97736	0.180525	-0.303899	-0.0542761	0.373791	0.0547423	0.720752	0.576256	0.157066	0.999544
FBgn0022942	Cbp80	5.48742	0.00236013	-0.0553384	-0.020808	0.974436	0.323384	0.707751	0.73874	0.326408	0.999544
FBgn0022943	Cbp20	3.71186	0.0419037	-0.0805326	0.057966	0.60229	0.190638	0.341727	0.644743	0.25673	0.999544
FBgn0022959	yps	8.31994	0.0142723	0.11668	0.0530497	0.88947	0.140697	0.494586	0.725388	0.227417	0.999544
FBgn0022960	vimar	3.91659	0.178402	-0.263792	-0.0808455	0.310688	0.053594	0.538672	0.553476	0.156335	0.999544
FBgn0022981	rpk	2.2808	1.87129	-0.894407	0.191909	0.240989	0.460803	0.873511	0.524753	0.383904	0.999544
FBgn0022984	qkr58E-3	4.95105	-0.0546061	0.0405518	-0.00194501	0.386162	0.392293	0.966998	0.581152	0.356738	0.999544
FBgn0022985	qkr58E-2	5.45507	0.115987	0.0407305	0.0101432	0.147905	0.491468	0.863283	0.46838	0.398655	0.999544
FBgn0022986	qkr58E-1	4.26926	0.0837928	0.069073	-0.0727182	0.434363	0.392469	0.368398	0.596553	0.356738	0.999544
FBgn0022987	qkr54B	4.4566	0.0887625	0.0136476	-0.0692766	0.38307	0.857379	0.36594	0.580027	0.520707	0.999544
FBgn0023000	mth	4.37549	-0.0503151	-0.0961838	-0.0266553	0.642884	0.244963	0.743799	0.657573	0.286139	0.999544
FBgn0023001	melt	2.58574	0.280366	0.208706	-0.032893	0.0292395	0.0311143	0.720371	0.254347	0.125794	0.999544
FBgn0023023	CRMP	5.42088	0.0139607	0.134134	-0.0132898	0.917581	0.19485	0.895847	0.729955	0.258877	0.999544
FBgn0023076	Clk	4.85779	-0.0409283	0.207853	0.0655558	0.832993	0.163748	0.654119	0.709997	0.239849	0.999544
FBgn0023081	gek	5.6796	-0.0902828	0.0519846	0.00527057	0.214328	0.338525	0.921897	0.509476	0.333655	0.999544
FBgn0023083	fray	5.97166	-0.205888	0.00197703	0.124976	0.142664	0.984702	0.233048	0.465334	0.552344	0.999544
FBgn0023094	cyc	4.6471	-0.0471067	-0.17246	-0.00816713	0.631988	0.0272386	0.911917	0.653869	0.118932	0.999544
FBgn0023095	caps	7.2598	0.170631	0.288609	0.142646	0.292288	0.0238416	0.243367	0.544745	0.112529	0.999544
FBgn0023097	bon	5.1805	0.232134	-0.0822622	-0.0414269	0.123907	0.459345	0.708139	0.447837	0.383676	0.999544
FBgn0023129	aay	6.7026	0.417073	0.112722	0.202721	0.00626496	0.290148	0.0639971	0.136477	0.310011	0.999544
FBgn0023130	a6	3.41797	0.228369	-0.126395	-0.0102453	0.0318251	0.106237	0.892701	0.260817	0.201778	0.999544
FBgn0023143	Uba1	8.31496	-0.0459824	0.0070134	-0.0385996	0.618853	0.91946	0.579155	0.649946	0.535333	0.999544
FBgn0023167	SmD3	4.91039	0.0811274	-0.0640892	-0.0133767	0.475715	0.454251	0.875126	0.60752	0.381375	0.999544
FBgn0023169	AMPKalpha	6.92919	-0.0551815	-0.013001	-0.0128648	0.42935	0.803324	0.805341	0.594289	0.50348	0.999544
FBgn0023170	RpL39	9.33914	-0.0249479	-0.0553637	0.0509792	0.811337	0.483595	0.51854	0.706238	0.394573	0.999544
FBgn0023171	rnh1	3.07789	-0.0532414	-0.161375	-0.0267946	0.688837	0.116533	0.788818	0.674407	0.209663	0.999544
FBgn0023172	RhoGEF2	7.60844	-0.181649	0.0878796	0.0280094	0.184186	0.387673	0.781444	0.491305	0.354516	0.999544
FBgn0023174	Prosbeta2	7.876	-0.0409742	-0.0330236	-0.00457482	0.652935	0.630153	0.946679	0.661456	0.448464	0.999544
FBgn0023175	Prosalpha7	7.84791	-0.0298924	-0.0594042	-0.0155302	0.727924	0.362084	0.810036	0.686089	0.342789	0.999544
FBgn0023177	Pp4-19C	4.79237	0.0399558	-0.212002	-0.0345388	0.71178	0.0148698	0.671399	0.681611	0.0947228	0.999544
FBgn0023178	Pdf	-0.0185538	0.832852	0.00021465	-0.0842391	0.258758	0.999687	0.877781	0.531425	0.555673	0.999544
FBgn0023179	amon	1.54774	-0.0110891	0.352803	0.0646781	0.970784	0.133006	0.77765	0.737932	0.22162	0.999544
FBgn0023180	Orc6	0.982723	0.458479	-0.480406	-0.0345701	0.286702	0.144864	0.914405	0.542139	0.228445	0.999544
FBgn0023181	Orc4	2.81042	0.151927	-0.267306	-0.0566831	0.487551	0.113329	0.730023	0.612996	0.207182	0.999544
FBgn0023212	EloB	7.63108	-0.115704	0.0640748	0.0328887	0.335431	0.476261	0.713482	0.561989	0.390873	0.999544
FBgn0023213	eIF4G1	8.76092	-0.00586351	0.0320495	-0.0583555	0.942923	0.604084	0.348454	0.732986	0.439668	0.999544
FBgn0023214	edl	3.32305	0.0536441	0.377345	0.0972502	0.662209	0.00042567	0.298491	0.664156	0.016685	0.999544
FBgn0023215	Mnt	5.4488	0.137868	0.111481	-0.0722692	0.388792	0.354996	0.546517	0.58218	0.339887	0.999544
FBgn0023216	Parg	3.46539	0.0530532	-0.189299	-0.0530895	0.718391	0.0972762	0.63214	0.683728	0.194597	0.999544
FBgn0023388	Dap160	5.56326	-0.0658173	0.047243	-0.0323349	0.541789	0.560409	0.689659	0.627944	0.425053	0.999544
FBgn0023395	Chd3	0.554029	1.26476	-1.31267	-0.0418408	0.390646	0.253749	0.970546	0.582714	0.2904	0.999544
FBgn0023407	B4	6.08583	-0.0308909	0.023046	-0.0642033	0.747632	0.749701	0.377798	0.691196	0.487278	0.999544
FBgn0023441	fus	8.99913	-0.0119299	0.222412	0.0523315	0.915258	0.01397	0.536752	0.729583	0.0904127	0.999544
FBgn0023458	Rbcn-3A	6.62064	0.157462	0.0793061	-0.0423263	0.0366806	0.150879	0.435654	0.275065	0.231408	0.999544
FBgn0023477	Taldo	8.04607	0.110742	-0.192851	0.0496197	0.371145	0.0460347	0.592175	0.574372	0.14624	0.999544
FBgn0023479	teq	9.46818	-0.0646655	0.0383103	0.0172234	0.710055	0.7696	0.895156	0.681261	0.493806	0.999544
FBgn0023506	Es2	3.38541	0.0620368	-0.091143	-0.0552487	0.424679	0.126552	0.346351	0.592157	0.216601	0.999544
FBgn0023507	D2hgdh	8.39393	-0.0842432	0.100822	0.131465	0.473337	0.258226	0.144341	0.607039	0.293641	0.999544
FBgn0023508	Ocrl	5.02143	0.176278	-0.034751	-0.0559075	0.0437837	0.581172	0.377378	0.297348	0.43199	0.999544
FBgn0023509	mip130	4.37758	0.0378208	-0.114767	-0.0142726	0.748018	0.202962	0.8719	0.691196	0.263132	0.999544
FBgn0023510	Rbcn-3B	5.72992	0.0317658	0.0360687	-0.011443	0.711718	0.577826	0.859404	0.681611	0.430866	0.999544
FBgn0023511	Edem1	5.25812	-0.11532	-0.045768	0.0315368	0.0999263	0.37499	0.5391	0.41228	0.349225	0.999544
FBgn0023512	eIF2Bepsilon	4.92518	0.0116828	-0.0233119	0.0301715	0.861035	0.643181	0.549446	0.71745	0.453522	0.999544
FBgn0023513	CG14803	3.53734	0.174239	-0.147616	0.018958	0.320534	0.26502	0.884587	0.556734	0.297553	0.999544
FBgn0023514	CG14805	5.07331	-0.0581672	-0.146996	-0.0220821	0.397843	0.00830439	0.667808	0.585098	0.0708119	0.999544
FBgn0023515	Gcna	2.74591	1.05818	-0.846632	-0.017554	0.39171	0.367745	0.98496	0.583052	0.34581	0.999544
FBgn0023516	Pex5	6.48005	-0.0262287	0.000416181	0.0562053	0.798553	0.995703	0.469644	0.705001	0.554865	0.999544
FBgn0023517	Pgam5	4.01528	0.26242	-0.165273	-0.0629817	0.0793025	0.137961	0.563575	0.379287	0.225607	0.999544
FBgn0023518	trr	4.93257	0.110944	0.0246783	-0.0027588	0.220863	0.713175	0.967171	0.512042	0.476192	0.999544
FBgn0023519	mRpL16	4.09981	0.0176207	-0.131469	0.0281505	0.837278	0.0512124	0.663392	0.711737	0.154031	0.999544
FBgn0023520	CG3857	3.36309	0.104306	0.150347	0.013981	0.47733	0.180199	0.898793	0.607768	0.251102	0.999544
FBgn0023521	CG3587	3.24982	0.0531306	-0.0635177	0.0122961	0.515451	0.305216	0.840863	0.62008	0.318342	0.999544
FBgn0023522	CG11596	5.11465	0.317745	-0.140389	-0.0643899	0.169351	0.413162	0.70573	0.48361	0.364653	0.999544
FBgn0023525	CG3191	4.65685	-0.0135759	0.107307	-0.0115907	0.93003	0.360883	0.920643	0.730545	0.342471	0.999544
FBgn0023526	CG2865	4.53351	0.290239	0.0255594	-0.0991093	0.131327	0.85622	0.484591	0.455251	0.520328	0.999544
FBgn0023527	CG3071	5.21267	0.0142849	-0.147924	-0.0272887	0.905089	0.110925	0.762309	0.727872	0.205461	0.999544
FBgn0023528	CG2924	5.67002	0.0368547	-0.236327	-0.0832341	0.813651	0.054107	0.481455	0.707339	0.15689	0.999544
FBgn0023529	CG2918	7.37815	-0.228288	-0.0692348	-0.0756368	0.0224422	0.33355	0.291758	0.230649	0.331261	0.999544
FBgn0023530	CG3740	4.40369	-0.0452969	-0.0732551	-0.0222215	0.574991	0.234062	0.714145	0.636937	0.280352	0.999544
FBgn0023531	CG32809	2.86771	0.509448	0.133084	-0.150893	0.00777259	0.321691	0.262673	0.147669	0.325876	0.999544
FBgn0023535	arg	6.93656	-0.0553457	-0.0802981	0.0352202	0.702455	0.463384	0.746525	0.678726	0.38485	0.999544
FBgn0023536	CG3156	4.88739	-0.00490197	0.10213	0.0286121	0.92627	0.0165226	0.475384	0.730545	0.0992583	0.999544
FBgn0023537	CG17896	7.28067	0.281035	-0.0755646	0.0481408	0.000629741	0.169699	0.375647	0.041875	0.244033	0.999544
FBgn0023540	CG3630	4.93967	0.0700909	-0.147996	0.0626934	0.566321	0.116356	0.496085	0.633203	0.209615	0.999544
FBgn0023541	Cyp4d14	1.01415	0.267933	-0.0509802	-0.0899796	0.385102	0.825119	0.696872	0.581045	0.511294	0.999544
FBgn0023542	Nmd3	6.10385	-0.00978898	0.000872214	0.0344422	0.889386	0.986857	0.517377	0.725388	0.552797	0.999544
FBgn0023545	PIG-K	4.6042	0.019199	-0.0254206	0.0105388	0.744119	0.566715	0.811692	0.690976	0.427846	0.999544
FBgn0023549	Mct1	7.5193	0.087246	0.214865	-0.0035977	0.581228	0.0802923	0.975802	0.638343	0.180719	0.999544
FBgn0023550	FarO	6.83291	0.126589	0.198079	0.0235176	0.43602	0.113038	0.846518	0.596553	0.207012	0.999544
FBgn0024150	Ac78C	3.11336	0.218459	0.426745	0.00238061	0.267928	0.00746982	0.987057	0.535964	0.0681898	0.999544
FBgn0024177	zpg	2.88524	2.03711	-0.269025	0.355278	0.230309	0.831263	0.778488	0.518075	0.513216	0.999544
FBgn0024179	wit	5.96454	-0.0402484	0.0933653	-0.0617347	0.808569	0.457648	0.62213	0.705452	0.38331	0.999544
FBgn0024182	waw	4.34283	0.138281	0.0458614	0.00909041	0.186022	0.553687	0.906192	0.492306	0.422406	0.999544
FBgn0024183	vig	7.82656	-0.086117	0.169464	0.011083	0.386573	0.0305016	0.881296	0.581152	0.12433	0.999544
FBgn0024184	unc-4	2.17671	-0.122089	0.290655	0.0236715	0.568005	0.0808126	0.882949	0.633917	0.181257	0.999544
FBgn0024187	syd	6.05283	-0.114752	0.104008	-0.0107319	0.26918	0.185862	0.889266	0.536217	0.25404	0.999544
FBgn0024188	san	5.06928	-0.0828715	-0.164809	-0.0085396	0.411585	0.0374971	0.909793	0.588307	0.134206	0.999544
FBgn0024189	sns	2.91441	-0.0325342	0.476339	-0.145049	0.869522	0.00388003	0.337314	0.720224	0.0518093	0.999544
FBgn0024191	sip1	3.50764	-0.0339098	0.105736	0.05924	0.825966	0.36671	0.610792	0.708936	0.345219	0.999544
FBgn0024194	rasp	3.63559	0.542767	-0.148802	-0.047104	0.0118626	0.329154	0.755095	0.175291	0.328912	0.999544
FBgn0024196	robl	4.47464	-0.059098	-0.0702638	-0.0132851	0.26744	0.0858455	0.73721	0.535681	0.184867	0.999544
FBgn0024222	IKKbeta	4.54622	0.0367289	-0.0743752	0.00947151	0.691276	0.290491	0.891575	0.674686	0.310192	0.999544
FBgn0024227	aurB	-0.26292	0.747916	-0.904591	-0.771752	0.569609	0.374215	0.447282	0.634883	0.348905	0.999544
FBgn0024230	Hs2st	4.75283	0.00424888	-0.00335232	0.011622	0.942914	0.940148	0.79477	0.732986	0.540515	0.999544
FBgn0024234	gbb	5.23837	-0.0482868	0.0558497	0.0661529	0.554551	0.36623	0.286276	0.63263	0.3449	0.999544
FBgn0024236	foi	6.50909	0.0477669	0.0560164	-0.00287304	0.505554	0.302864	0.957345	0.617521	0.317183	0.999544
FBgn0024238	Fim	6.25167	-0.0438409	0.0764228	-0.0568738	0.730698	0.427909	0.553947	0.686709	0.371003	0.999544
FBgn0024244	drm	2.14612	-0.0695862	0.182623	0.10935	0.635081	0.108013	0.326847	0.655195	0.203168	0.999544
FBgn0024245	dnt	2.26517	0.372434	-0.102132	-0.106569	0.205724	0.639855	0.625462	0.505131	0.452358	0.999544
FBgn0024248	chico	6.2932	0.00969794	0.208164	0.0413852	0.937295	0.0331965	0.656183	0.732462	0.127985	0.999544
FBgn0024250	brk	2.72514	-0.0399848	0.0732959	0.00627887	0.737054	0.416778	0.944128	0.688773	0.3658	0.999544
FBgn0024251	bbx	6.24242	0.0675302	0.0783046	-0.0100773	0.515256	0.319146	0.896851	0.620032	0.324873	0.999544
FBgn0024273	WASp	4.00401	0.130609	-0.0998688	-0.069606	0.234206	0.227045	0.395825	0.521249	0.275814	0.999544
FBgn0024277	trio	5.73411	0.206814	0.224176	-0.0954836	0.0488868	0.00650298	0.214345	0.309957	0.0642463	0.999544
FBgn0024285	Srp54	5.43683	0.101156	-0.0507212	0.0118671	0.322217	0.506856	0.876008	0.557259	0.404122	0.999544
FBgn0024289	Sodh-1	3.91659	0.46469	-0.428771	0.0718659	0.0661167	0.0270276	0.695433	0.353411	0.118668	0.999544
FBgn0024291	Sirt1	5.91136	0.0862124	-0.129665	-0.0228494	0.147058	0.00647458	0.601969	0.466981	0.0642463	0.999544
FBgn0024293	Spn43Ab	9.57533	-0.167545	-0.0283992	0.0596899	0.256526	0.795491	0.586888	0.530397	0.501102	0.999544
FBgn0024314	Plap	5.55196	0.00882688	-0.100221	-0.00370095	0.903047	0.0762039	0.945877	0.727422	0.177152	0.999544
FBgn0024315	Picot	6.15548	0.0212898	-0.241394	-0.18495	0.939952	0.263109	0.388461	0.732897	0.296469	0.999544
FBgn0024320	Npc1a	6.63901	-0.128298	0.19475	0.0236524	0.113987	0.00307251	0.690798	0.437397	0.0477114	0.999544
FBgn0024321	NK7.1	4.18309	0.0685175	0.411906	-0.0630632	0.564997	0.000114397	0.482615	0.633203	0.00812686	0.999544
FBgn0024326	Mkk4	5.62029	0.0622534	0.0272364	-0.0516016	0.384243	0.610887	0.338678	0.580693	0.44163	0.999544
FBgn0024329	Mekk1	6.35556	0.143864	0.148787	-0.000929355	0.152975	0.0540366	0.989979	0.474251	0.15689	0.999544
FBgn0024330	MED6	3.46216	0.0687647	0.0928874	0.0353339	0.595864	0.344707	0.716923	0.643808	0.335689	0.999544
FBgn0024352	Stip1	6.64546	0.122345	-0.270344	-0.08833	0.415928	0.0233427	0.434807	0.589734	0.111669	0.999544
FBgn0024360	MTPAP	3.79659	0.102381	-0.0973467	-0.035487	0.434096	0.325064	0.717208	0.596553	0.327055	0.999544
FBgn0024361	Tsp2A	2.32964	-0.191448	-0.368218	0.0174521	0.589831	0.177856	0.948016	0.641468	0.249095	0.999544
FBgn0024362	Naa30A	5.88361	0.10313	0.00849044	0.00166893	0.156315	0.873932	0.975112	0.475649	0.52421	0.999544
FBgn0024364	CG11417	5.01189	0.138866	-0.0679635	-0.0319067	0.444361	0.617503	0.814234	0.599267	0.44404	0.999544
FBgn0024365	CG12773	6.05916	-0.00676546	-0.0523921	0.0102025	0.916461	0.286529	0.833556	0.729821	0.308654	0.999544
FBgn0024366	CG11409	3.81874	1.44247	0.264377	0.208017	3.19e-05	0.219766	0.331157	0.0109429	0.271657	0.999544
FBgn0024371	E2f2	3.60769	0.208191	-0.396721	-0.041661	0.346225	0.0233667	0.800629	0.565464	0.111673	0.999544
FBgn0024432	Dlc90F	5.38903	0.103092	-0.100976	-0.000861507	0.239486	0.129725	0.989411	0.524374	0.21977	0.999544
FBgn0024491	Bin1	3.79711	0.0150852	-0.57455	0.161392	0.970607	0.0729321	0.602279	0.737932	0.175154	0.999544
FBgn0024509	Sec13	6.04936	0.0470651	-0.174717	-0.0190108	0.455832	0.00109691	0.687596	0.601674	0.028318	0.999544
FBgn0024510	dlt	3.29244	-0.164159	-0.136788	-0.0623045	0.319847	0.272164	0.613121	0.556334	0.301019	0.999544
FBgn0024542	Neos	2.67857	0.14353	-0.336494	-0.0919713	0.406398	0.0151624	0.479699	0.587652	0.0955118	0.999544
FBgn0024555	flfl	7.08888	-0.16112	0.229331	0.0665478	0.0333993	0.000288822	0.226307	0.264451	0.0133651	0.999544
FBgn0024556	mEFTu1	6.6725	0.0789812	-0.0946023	0.0126055	0.416349	0.200757	0.86215	0.589947	0.26202	0.999544
FBgn0024558	Dph5	5.15931	0.300734	-0.198767	0.0208874	0.21427	0.273437	0.907133	0.509476	0.30157	0.999544
FBgn0024689	fws	5.06998	0.107218	-0.049983	-0.0356969	0.0335195	0.174254	0.326965	0.264451	0.247023	0.999544
FBgn0024698	Cpsf160	4.23205	0.135631	-0.166725	-0.059755	0.360946	0.141641	0.590458	0.572908	0.227923	0.999544
FBgn0024728	Slip1	5.41494	0.0387691	0.0412708	-0.0904641	0.688242	0.570964	0.220435	0.674174	0.429364	0.999544
FBgn0024732	Drep1	4.6064	0.118265	0.0109034	-0.00799593	0.388872	0.91522	0.937769	0.58218	0.534458	0.999544
FBgn0024733	RpL10	11.3108	-0.103522	-0.00365743	0.0836777	0.304443	0.961077	0.270809	0.549564	0.546328	0.999544
FBgn0024734	PRL-1	6.86405	0.0180158	0.132203	-0.00900083	0.821519	0.036375	0.880896	0.708936	0.132831	0.999544
FBgn0024754	Flo1	6.01924	-0.185196	0.119705	0.0490637	0.0135237	0.0309287	0.355287	0.185474	0.125272	0.999544
FBgn0024804	Dbp80	5.53747	0.045793	0.0467336	-0.0536923	0.621305	0.503832	0.443216	0.650283	0.402977	0.999544
FBgn0024806	DIP2	5.5069	-0.0812307	-0.127841	-0.0997854	0.432948	0.108792	0.205586	0.59645	0.203967	0.999544
FBgn0024807	DIP1	7.4921	-0.0583648	0.139329	-0.0779141	0.78183	0.383329	0.623848	0.700114	0.352939	0.999544
FBgn0024811	Crk	5.45851	0.114214	-0.143436	-0.0529627	0.159878	0.0237301	0.379818	0.476387	0.112415	0.999544
FBgn0024814	Clc	6.80952	-0.118086	-0.00561769	-0.00437377	0.10886	0.916859	0.93522	0.429829	0.534873	0.999544
FBgn0024833	AP-1mu	5.04518	0.0888612	-0.146257	-0.0163268	0.162386	0.00447038	0.727561	0.47833	0.0555701	0.999544
FBgn0024841	Pcd	4.86425	0.141962	-0.0653724	0.0223497	0.133321	0.350619	0.747516	0.456476	0.33804	0.999544
FBgn0024846	p38b	5.57807	-0.0225529	0.00618223	0.0570411	0.755967	0.90977	0.301542	0.694629	0.533011	0.999544
FBgn0024887	kin17	3.93871	-0.041512	0.00441701	0.0270254	0.519341	0.927081	0.576827	0.621559	0.536987	0.999544
FBgn0024889	Kap-alpha1	6.79765	-0.125094	-0.00161394	-0.0354465	0.050135	0.971996	0.443751	0.311934	0.54953	0.999544
FBgn0024897	b6	2.97699	1.14811	1.0167	0.148352	0.000156766	2.64e-05	0.450598	0.0210163	0.00428388	0.999544
FBgn0024909	Taf7	3.08133	0.0166728	-0.163674	-0.12243	0.900456	0.113143	0.230242	0.727302	0.207049	0.999544
FBgn0024913	Actbeta	1.27617	0.0430841	0.202314	-0.0836068	0.890432	0.395185	0.72351	0.725388	0.357817	0.999544
FBgn0024920	Ts	1.20104	1.75599	-0.749585	0.347773	0.271709	0.536275	0.773405	0.537512	0.415025	0.999544
FBgn0024921	Tnpo	6.3136	0.0376149	-0.0956222	-0.0816004	0.621487	0.104606	0.162728	0.650283	0.200583	0.999544
FBgn0024944	Oamb	0.720606	0.206462	0.0550644	0.144219	0.302847	0.712703	0.339121	0.549097	0.47609	0.999544
FBgn0024945	NitFhit	5.18573	0.0717057	-0.0247651	0.0346555	0.447283	0.725866	0.624129	0.599714	0.479657	0.999544
FBgn0024947	NTPase	6.85305	-0.288643	0.149055	-0.0200737	0.0111747	0.0706908	0.800612	0.16779	0.172848	0.999544
FBgn0024956	Mat1	3.51463	0.084104	-0.227293	-0.0222286	0.465232	0.0139694	0.796653	0.604408	0.0904127	0.999544
FBgn0024957	Irp-1B	8.62174	-0.111786	0.0261317	0.0260753	0.332216	0.760991	0.76149	0.560516	0.491419	0.999544
FBgn0024958	Irp-1A	5.3762	-0.0447159	-0.0260552	0.0321127	0.623071	0.703179	0.638914	0.650891	0.472979	0.999544
FBgn0024963	GluClalpha	3.3176	0.00514813	0.411862	-0.0405267	0.987092	0.0963429	0.865918	0.74229	0.19406	0.999544
FBgn0024973	CG2701	5.15844	-0.086084	-0.0158494	-0.0183942	0.185637	0.741386	0.701838	0.492204	0.485051	0.999544
FBgn0024975	CG2712	2.42111	0.0302141	-0.082661	-0.0385729	0.873901	0.565688	0.78806	0.72187	0.427535	0.999544
FBgn0024980	Syx4	4.41955	-0.140789	0.107181	-0.0838984	0.485145	0.480132	0.579634	0.612227	0.392737	0.999544
FBgn0024983	CG4293	3.68077	0.158164	-0.112417	-0.0366547	0.144204	0.166842	0.645792	0.465334	0.242066	0.999544
FBgn0024984	CG3457	0.369185	1.50206	-0.894881	-0.0795494	0.317541	0.432583	0.943995	0.555403	0.372856	0.999544
FBgn0024985	Rilpl	5.40804	0.0292279	0.088032	-0.0335679	0.80293	0.322872	0.703533	0.705035	0.326325	0.999544
FBgn0024986	CG3719	4.91654	-0.165369	-0.068995	-0.011397	0.0501655	0.263157	0.851329	0.311934	0.296469	0.999544
FBgn0024987	ssx	5.52945	0.116208	0.0258517	-0.0630583	0.101582	0.618644	0.230989	0.41512	0.444457	0.999544
FBgn0024989	CG3777	4.8522	0.868213	0.675747	0.0503656	0.000112454	7.61e-05	0.722253	0.019013	0.00672316	0.999544
FBgn0024991	CG2694	3.5642	0.326575	-0.487058	-0.0860572	0.268168	0.0348438	0.695176	0.536089	0.130737	0.999544
FBgn0024992	Spg7	5.05552	0.114617	-0.0396461	-0.0525179	0.0836178	0.413975	0.281889	0.387627	0.365017	0.999544
FBgn0024993	CG2662	1.77701	0.0440163	-0.404028	-0.0821914	0.871537	0.0595502	0.69022	0.720648	0.161715	0.999544
FBgn0024994	Ugalt	3.84615	0.10459	-0.014408	0.0137445	0.409167	0.879028	0.884557	0.587652	0.525552	0.999544
FBgn0024995	CG2680	1.75207	0.518219	-1.03474	-0.961373	0.612633	0.201232	0.23389	0.647884	0.26208	0.999544
FBgn0024996	eIF2Bbeta	4.8569	-0.0436475	-0.0290902	-0.0015758	0.395171	0.45058	0.96719	0.584466	0.380538	0.999544
FBgn0024997	CG2681	1.18356	-0.0603673	-0.932012	0.453325	0.930156	0.0935371	0.403271	0.730556	0.192743	0.999544
FBgn0024998	CG2685	3.53749	0.102349	-0.174443	-0.0141441	0.487011	0.123621	0.897942	0.612941	0.214439	0.999544
FBgn0025109	Bem46	3.84382	0.00288506	-0.0270186	-0.00751825	0.963875	0.57443	0.875424	0.735757	0.430129	0.999544
FBgn0025111	Ant2	1.58649	0.0590687	0.0720701	-0.0440647	0.729835	0.577048	0.732545	0.68651	0.430685	0.999544
FBgn0025185	az2	2.48541	0.160294	-0.138809	-0.0492234	0.432333	0.367786	0.747482	0.595882	0.34581	0.999544
FBgn0025186	ari-2	4.4239	0.0665001	-0.140618	-0.0860955	0.564015	0.113828	0.324467	0.633203	0.207443	0.999544
FBgn0025335	Cpes	5.4322	0.00739349	-0.124742	-0.0223135	0.925362	0.0449003	0.707519	0.730545	0.144335	0.999544
FBgn0025336	CG4882	4.48701	0.196144	-0.139649	0.0175889	0.0545604	0.0677768	0.811187	0.324406	0.169806	0.999544
FBgn0025352	Mtpbeta	8.22885	-0.164978	-0.0996634	0.0334058	0.145445	0.238529	0.688668	0.466439	0.282906	0.999544
FBgn0025355	SuUR	3.37167	-0.0300958	-0.103185	-0.100532	0.759265	0.171518	0.18234	0.695401	0.244883	0.999544
FBgn0025366	Ip259	7.87511	-0.053708	-0.0240059	0.1368	0.565893	0.732454	0.0610046	0.633203	0.481959	0.999544
FBgn0025373	Fpps	4.55265	-0.107921	-0.0548233	0.0258026	0.302172	0.483222	0.740323	0.548969	0.394347	0.999544
FBgn0025381	rush	7.07151	-0.171005	0.113058	0.0400787	0.210414	0.269232	0.691774	0.509015	0.30009	0.999544
FBgn0025388	Alms1a	2.48071	0.0318413	-0.337854	-0.170664	0.927685	0.210107	0.521174	0.730545	0.266932	0.999544
FBgn0025390	Mur2B	5.69765	0.173155	-0.0995889	-0.151509	0.364872	0.486877	0.293579	0.573708	0.396785	0.999544
FBgn0025391	Scgdelta	3.60471	1.23331	0.459395	0.0586838	0.000170711	0.0365742	0.779005	0.0213933	0.133158	0.999544
FBgn0025394	inc	5.73375	0.118105	-0.0132931	-0.00467297	0.1129	0.807304	0.931632	0.435412	0.505109	0.999544
FBgn0025454	Cyp6g1	9.27225	0.525482	0.193712	-0.0876778	0.347574	0.642838	0.833428	0.566209	0.453477	0.999544
FBgn0025455	CycT	6.50094	-0.0158583	0.0416427	-0.045935	0.789532	0.355885	0.309489	0.702107	0.340489	0.999544
FBgn0025456	CREG	7.31353	-0.170058	0.0625427	-0.0152833	0.127589	0.447377	0.851803	0.452205	0.379285	0.999544
FBgn0025457	Bub3	3.89651	0.217029	-0.314116	-0.101602	0.395756	0.109938	0.59562	0.584669	0.204771	0.999544
FBgn0025463	Bap60	5.31548	0.140907	-0.202619	-0.039221	0.34404	0.0779477	0.724	0.564279	0.17837	0.999544
FBgn0025469	slv	3.50016	-0.0208655	0.0168606	0.0244177	0.764459	0.747774	0.641852	0.696776	0.486771	0.999544
FBgn0025519	fidipidine	4	0.059543	0.0388918	-0.0841316	0.283748	0.350687	0.0510065	0.541227	0.33804	0.999544
FBgn0025525	bab2	6.22861	0.100629	0.379195	-0.0167696	0.535544	0.00456506	0.89041	0.627117	0.056315	0.999544
FBgn0025549	unc-119	4.56186	0.166704	-0.175127	-0.129908	0.292289	0.146126	0.27588	0.544745	0.228731	0.999544
FBgn0025558	CG4101	2.07393	0.107127	-0.0893223	0.00538863	0.431391	0.384703	0.957817	0.59496	0.353596	0.999544
FBgn0025571	SF1	5.67611	0.0456181	0.0348553	-0.0695888	0.794392	0.791293	0.59813	0.703741	0.499915	0.999544
FBgn0025574	Pli	5.37958	-0.0414509	-0.0765933	-0.103225	0.71923	0.38081	0.24082	0.683728	0.351798	0.999544
FBgn0025582	eIF3e	8.32769	0.00274307	0.0183641	0.0877989	0.975021	0.780742	0.191473	0.73874	0.497294	0.999544
FBgn0025583	BomS2	8.90778	-0.677012	0.627426	0.135092	0.0259534	0.00752746	0.533489	0.243348	0.0681898	0.999544
FBgn0025592	Gk1	6.58353	0.010835	-0.138922	0.00286352	0.945761	0.253395	0.980936	0.733735	0.290297	0.999544
FBgn0025595	AkhR	7.85941	0.290912	0.0733004	-0.00196161	0.176187	0.644512	0.990124	0.487972	0.453953	0.999544
FBgn0025608	Faf2	6.69023	-0.0404707	-0.0176829	-0.00415121	0.507577	0.699469	0.927675	0.617567	0.471715	0.999544
FBgn0025615	Torsin	5.50971	0.159325	-0.168851	0.00478805	0.0494006	0.00772384	0.934605	0.310414	0.0685174	0.999544
FBgn0025620	CG13360	7.7042	-0.417658	0.17527	-0.00426962	0.0160727	0.160334	0.972095	0.199123	0.237082	0.999544
FBgn0025621	CG16989	7.07788	0.254047	0.111299	0.126595	0.149167	0.393657	0.333086	0.471002	0.357194	0.999544
FBgn0025624	CG4025	4.70083	-0.226924	0.0987564	0.106441	0.184103	0.436315	0.401987	0.491285	0.374092	0.999544
FBgn0025625	Sik2	4.5845	-0.366108	0.067151	-0.0328802	0.0176386	0.538655	0.762619	0.207479	0.41593	0.999544
FBgn0025626	CG4281	4.98203	0.0835572	-0.121074	-0.0314984	0.515755	0.216537	0.743845	0.620174	0.269043	0.999544
FBgn0025628	CG4199	8.0808	-0.56965	0.270223	0.0661236	0.00497053	0.0620703	0.635488	0.120412	0.163858	0.999544
FBgn0025629	CG4045	3.54449	0.0991964	-0.0342244	-0.00487831	0.384714	0.688332	0.954324	0.581045	0.468736	0.999544
FBgn0025630	Rtca	3.36211	-0.288033	-0.0463568	-0.12969	0.0426717	0.650398	0.21187	0.294569	0.45521	0.999544
FBgn0025631	moody	6.05685	-0.0174854	0.188366	0.0067899	0.901017	0.0851802	0.948814	0.727302	0.184087	0.999544
FBgn0025632	CG4313	1.51746	0.172292	-0.0781002	0.0304761	0.315674	0.543329	0.811869	0.554683	0.417915	0.999544
FBgn0025633	CG13366	4.91609	0.232711	-0.405151	-0.176915	0.435179	0.0792952	0.430524	0.596553	0.179717	0.999544
FBgn0025634	CG13367	4.27654	0.0069166	-0.144311	0.00148171	0.909172	0.0040779	0.974089	0.728711	0.053424	0.999544
FBgn0025635	CG17829	3.58424	0.224414	-0.286011	-0.0837874	0.221925	0.0447317	0.539648	0.51247	0.144079	0.999544
FBgn0025637	SkpA	7.06215	0.0613542	-0.0908406	0.00714136	0.39041	0.0985952	0.893441	0.582714	0.195199	0.999544
FBgn0025638	Roc1a	6.51811	-0.00723069	-0.0773904	0.000960785	0.900097	0.084364	0.98231	0.727302	0.183625	0.999544
FBgn0025639	Hmt4-20	6.04184	0.181134	-0.155063	-0.0525457	0.286054	0.226578	0.677518	0.542027	0.275725	0.999544
FBgn0025640	CG13369	6.00616	-0.1337	0.00537455	0.021017	0.185656	0.942494	0.77806	0.492204	0.541057	0.999544
FBgn0025641	DAAM	3.78852	0.818007	-0.212915	-0.0479641	0.0193438	0.392782	0.846144	0.213468	0.356738	0.999544
FBgn0025643	CG3588	-0.471132	0.964261	-0.0275467	-0.0408554	0.263867	0.965711	0.949166	0.533554	0.547377	0.999544
FBgn0025674	CycK	5.58902	-0.0759981	-0.107282	0.000882867	0.265274	0.0431639	0.986082	0.534724	0.142229	0.999544
FBgn0025676	CkIIalpha-i3	1.66384	-0.224702	-0.288317	-0.125561	0.440356	0.195757	0.567206	0.597584	0.259253	0.999544
FBgn0025678	CaBP1	5.97805	-0.141894	-0.109735	-0.0777299	0.173605	0.162439	0.317135	0.487767	0.239032	0.999544
FBgn0025680	cry	6.9933	0.300847	-0.302183	0.0448787	0.0467129	0.0100924	0.680416	0.30563	0.076288	0.999544
FBgn0025681	CG3558	6.11617	-0.0568255	0.0568106	-0.0210866	0.429848	0.296793	0.695489	0.594468	0.313858	0.999544
FBgn0025682	scf	5.33945	-0.0673908	-0.0275144	-0.0646746	0.453751	0.683023	0.34121	0.601041	0.46735	0.999544
FBgn0025683	CG3164	10.6984	-0.280885	0.103379	0.0146966	0.049377	0.320308	0.886406	0.310414	0.325221	0.999544
FBgn0025684	MFS18	4.19819	0.220921	-0.0653934	-0.0158281	0.0547722	0.433739	0.848743	0.324406	0.373058	0.999544
FBgn0025686	Amnionless	3.74214	-0.136645	0.18104	-0.0339659	0.533074	0.277039	0.836318	0.625566	0.303135	0.999544
FBgn0025692	Lfg	2.2349	-0.531756	-0.484625	-0.121766	0.217984	0.142005	0.705763	0.510751	0.227923	0.999544
FBgn0025693	ZnT41F	5.04367	-0.293611	0.0242599	-0.038858	0.0318681	0.803848	0.691082	0.260817	0.503618	0.999544
FBgn0025697	santa-maria	6.04348	-0.505209	0.15757	0.0498824	0.00506419	0.210908	0.687343	0.121719	0.267093	0.999544
FBgn0025700	CG5885	6.40804	0.0658425	-0.183412	-0.0206959	0.370448	0.00262491	0.706203	0.574372	0.0431114	0.999544
FBgn0025702	Srpk79D	4.4046	0.0968349	0.270234	0.0999744	0.507522	0.0203315	0.36539	0.617567	0.10699	0.999544
FBgn0025709	CNT2	2.664	0.0159902	-0.728665	0.593028	0.976793	0.0939796	0.16838	0.739419	0.193141	0.999544
FBgn0025712	CG13920	2.60654	-0.0707112	0.0742064	-0.0188727	0.627546	0.500155	0.863193	0.652564	0.401414	0.999544
FBgn0025716	Bap55	3.94927	0.136953	-0.276295	-0.050464	0.396907	0.0301671	0.6765	0.584799	0.123687	0.999544
FBgn0025720	Ate1	5.9044	-0.149328	0.0630972	-0.0661905	0.149959	0.41134	0.389151	0.471631	0.3645	0.999544
FBgn0025724	beta'COP	6.42096	0.0382594	-0.0642308	-0.0202598	0.494079	0.134892	0.629422	0.615064	0.222474	0.999544
FBgn0025725	alphaCOP	6.60724	-0.0175239	-0.0278664	0.0116021	0.800559	0.594347	0.824067	0.705035	0.436239	0.999544
FBgn0025726	unc-13	6.01177	-0.0611017	-0.103877	-0.027349	0.752627	0.478421	0.851173	0.69332	0.391865	0.999544
FBgn0025739	pon	0.936354	1.23043	-0.318231	0.0360494	0.0876152	0.546573	0.945327	0.394848	0.419547	0.999544
FBgn0025740	PlexB	5.75272	0.0619315	0.00811522	-0.0662329	0.530131	0.912562	0.374383	0.624595	0.533882	0.999544
FBgn0025741	PlexA	7.13956	0.00795282	-0.0583149	-0.0913388	0.928664	0.386987	0.180615	0.730545	0.354222	0.999544
FBgn0025742	mtm	5.05231	-0.0142186	0.032236	0.0239335	0.829243	0.517576	0.630196	0.708936	0.408051	0.999544
FBgn0025743	mbt	4.46622	0.307669	-0.193317	-0.0716688	0.152187	0.228637	0.650756	0.474063	0.276539	0.999544
FBgn0025777	homer	4.50235	0.160433	-0.214887	-0.111315	0.318537	0.0827975	0.35692	0.556171	0.182744	0.999544
FBgn0025781	Cdc16	4.03386	0.0504607	-0.135227	-0.0215423	0.709925	0.193232	0.832721	0.681261	0.257735	0.999544
FBgn0025790	TBPH	4.91108	-0.00544058	0.12114	-0.012594	0.955303	0.107399	0.863143	0.735191	0.202877	0.999544
FBgn0025800	Smox	7.06267	-0.000106915	0.0215481	0.0138898	0.998785	0.683953	0.792792	0.744697	0.467668	0.999544
FBgn0025802	Sbf	5.00314	-0.134622	0.06842	-0.0182517	0.0454582	0.166273	0.706286	0.302895	0.241673	0.999544
FBgn0025807	Rad9	1.29426	0.152893	-0.395606	-0.0881352	0.560946	0.0556947	0.657294	0.633203	0.158022	0.999544
FBgn0025808	Rad17	2.13245	0.298637	-0.419344	-0.0131547	0.275832	0.049676	0.948681	0.537512	0.151719	0.999544
FBgn0025809	Paf-AHalpha	3.9036	0.0925258	-0.0874462	-0.120925	0.691983	0.619231	0.49306	0.674866	0.444457	0.999544
FBgn0025814	Mgstl	7.80737	-0.319172	-0.00286384	0.100078	0.175966	0.986852	0.566156	0.487972	0.552797	0.999544
FBgn0025815	Mcm6	3.50296	0.624069	-0.465699	-0.0482689	0.332271	0.336963	0.919889	0.560516	0.332882	0.999544
FBgn0025820	JTBR	3.58109	0.016697	-0.125965	-0.0773526	0.858196	0.083531	0.277821	0.7166	0.183046	0.999544
FBgn0025825	HDAC3	2.70298	0.0363013	-0.11826	0.0058686	0.70802	0.114855	0.935838	0.680711	0.20845	0.999544
FBgn0025827	CG6421	4.8324	-0.0378002	0.0372711	0.0475616	0.842717	0.794926	0.740249	0.713146	0.500988	0.999544
FBgn0025830	IntS8	3.944	0.0998057	0.00838385	-0.00222128	0.314394	0.909575	0.975991	0.554161	0.532998	0.999544
FBgn0025832	Fen1	2.29687	0.279295	-0.542737	-0.0996452	0.522331	0.109212	0.762235	0.622382	0.204237	0.999544
FBgn0025836	RhoGAP1A	6.02058	0.0917254	-0.0392154	-0.0522035	0.408438	0.636811	0.530448	0.587652	0.45119	0.999544
FBgn0025839	ND-B14.5A	5.54993	0.112547	-0.184499	0.0437401	0.318173	0.0365032	0.603149	0.556169	0.133125	0.999544
FBgn0025864	Crag	7.0252	-0.131744	0.121125	0.0138962	0.104844	0.0506568	0.814857	0.422001	0.153118	0.999544
FBgn0025865	Cortactin	5.0778	-0.0764726	-0.0902569	-0.0170873	0.471194	0.26241	0.829671	0.606233	0.296334	0.999544
FBgn0025866	CalpB	5.36257	-0.0870702	0.0235644	0.0058334	0.174376	0.618791	0.901712	0.487972	0.444457	0.999544
FBgn0025874	Meics	2.73209	0.0130131	-0.27407	0.0304091	0.914664	0.00610869	0.740087	0.72945	0.063681	0.999544
FBgn0025879	Timp	6.58568	-0.190164	0.0603602	-0.0208019	0.079923	0.447151	0.792166	0.379566	0.379159	0.999544
FBgn0025885	Inos	7.5116	-0.464179	-0.074672	-0.051723	0.000792403	0.41592	0.571596	0.0463482	0.365558	0.999544
FBgn0025936	Eph	6.16224	-0.00686669	0.0631949	-0.0356027	0.916148	0.206018	0.470722	0.729756	0.264827	0.999544
FBgn0026015	Top3beta	5.10641	0.106102	-0.0367063	0.0211724	0.326221	0.648894	0.792526	0.559131	0.455056	0.999544
FBgn0026056	Rlip	3.32043	0.110179	-0.160175	-0.114584	0.44084	0.143774	0.290014	0.597584	0.228161	0.999544
FBgn0026059	Mhcl	6.54999	0.232795	0.215108	0.042123	0.100104	0.046599	0.683926	0.41228	0.147267	0.999544
FBgn0026060	Mipp2	4.48234	0.0884028	0.0144033	-0.0951559	0.322037	0.828434	0.161316	0.557243	0.512412	0.999544
FBgn0026061	Mipp1	5.90485	0.0297998	-0.0432199	0.0267908	0.776559	0.58528	0.734639	0.699476	0.43371	0.999544
FBgn0026076	UBL3	5.05445	-0.0448754	-0.0524464	-0.0505191	0.614854	0.436349	0.45317	0.648445	0.374092	0.999544
FBgn0026077	Gasp	6.94325	0.507536	0.881207	0.230981	0.00752323	7.5e-07	0.08927	0.145477	0.00105445	0.999544
FBgn0026079	Nsun2	4.79185	0.0472382	0.0252365	-0.0191597	0.686923	0.774562	0.827794	0.67403	0.495029	0.999544
FBgn0026080	Tip60	3.9037	-0.0356444	-0.027195	-0.102777	0.662059	0.657747	0.103571	0.664156	0.457488	0.999544
FBgn0026083	tyf	7.04334	0.0687496	-0.058428	-0.0876932	0.576458	0.528521	0.346861	0.637072	0.412536	0.999544
FBgn0026084	cib	5.26723	0.252592	-0.214295	-0.24535	0.453633	0.398963	0.335388	0.601041	0.359384	0.999544
FBgn0026086	Adar	4.72109	0.0474129	0.114959	-0.059457	0.594679	0.0957101	0.377925	0.643411	0.19387	0.999544
FBgn0026088	CG14818	4.47712	-0.0217955	0.00981571	0.0333667	0.796459	0.877261	0.600622	0.704274	0.524976	0.999544
FBgn0026089	CG14817	4.21615	-0.0266076	-0.077052	0.0578448	0.724925	0.183896	0.314285	0.685833	0.252846	0.999544
FBgn0026090	CG14812	4.15371	-0.0595952	0.00963874	0.0564802	0.337451	0.835061	0.229853	0.562864	0.513724	0.999544
FBgn0026143	Cdc45	3.77889	0.285689	-0.503714	-0.07345	0.403073	0.0584539	0.773891	0.587596	0.161152	0.999544
FBgn0026144	CBP	3.02643	0.811809	-0.129914	-0.0304743	0.235389	0.797836	0.952054	0.521922	0.501409	0.999544
FBgn0026147	TTLL4A	5.33986	0.140157	-0.0622806	-0.0493299	0.395594	0.613999	0.689213	0.584669	0.442707	0.999544
FBgn0026148	CG12253	1.29854	0.430036	-0.629045	-0.0547289	0.200436	0.018637	0.827312	0.501662	0.104182	0.999544
FBgn0026149	BCL7-like	2.92401	0.220266	-0.271984	-0.0812116	0.376862	0.153509	0.663359	0.576922	0.232798	0.999544
FBgn0026150	ApepP	4.86785	0.158791	-0.18683	-0.0457332	0.321742	0.127111	0.701792	0.557243	0.217151	0.999544
FBgn0026160	tna	6.06686	-0.0839153	0.364401	0.0289116	0.596446	0.00515038	0.807956	0.643896	0.0589688	0.999544
FBgn0026179	siz	6.30677	-0.0438105	0.134984	0.0100829	0.655247	0.0771084	0.891153	0.661996	0.178141	0.999544
FBgn0026181	Rok	6.629	0.0678274	0.211384	0.0167285	0.502222	0.00975796	0.82514	0.615983	0.0747334	0.999544
FBgn0026189	promL	5.2903	-0.0499964	-0.112052	-0.116667	0.636314	0.167121	0.151038	0.655275	0.242079	0.999544
FBgn0026190	PH4alphaMP	3.23656	0.0993518	0.341223	0.133647	0.667243	0.0595734	0.445117	0.665924	0.161715	0.999544
FBgn0026192	par-6	5.04821	0.0663976	-0.0301369	-0.0513601	0.51157	0.691235	0.499933	0.618646	0.469427	0.999544
FBgn0026196	nop5	6.97167	0.0904448	0.0117989	-0.0609845	0.551666	0.917482	0.593454	0.631661	0.534873	0.999544
FBgn0026199	myo	6.56383	-0.101451	0.152736	-0.00709634	0.272039	0.0343627	0.917559	0.537512	0.130177	0.999544
FBgn0026206	mei-P26	5.39908	0.257735	0.00654746	-0.1272	0.242508	0.96803	0.439313	0.525373	0.547989	0.999544
FBgn0026207	mbo	5.58184	0.0361936	0.0323176	0.041876	0.764955	0.722853	0.646164	0.696894	0.479117	0.999544
FBgn0026238	gus	5.90686	0.105233	-0.236037	-0.0673978	0.45505	0.0334316	0.524159	0.601674	0.128452	0.999544
FBgn0026239	gukh	5.50482	-0.374993	0.182436	-0.0884591	0.0118341	0.0900665	0.399439	0.175283	0.18949	0.999544
FBgn0026250	eIF1A	8.3092	0.0461783	0.0295641	0.0421729	0.546454	0.607448	0.465045	0.62965	0.440723	0.999544
FBgn0026252	msk	8.31088	-0.0175555	-0.0724687	-0.0178786	0.852697	0.313778	0.801638	0.714875	0.322256	0.999544
FBgn0026255	clumsy	3.12518	-0.0437995	0.360706	-0.00642288	0.798628	0.00988049	0.960408	0.705001	0.0753898	0.999544
FBgn0026257	cav	2.06087	0.529713	-0.53141	-0.202593	0.269334	0.147308	0.57285	0.536217	0.229339	0.999544
FBgn0026259	eIF5B	6.77864	0.25847	0.0325647	-0.044008	0.0239568	0.688929	0.589081	0.235114	0.468835	0.999544
FBgn0026261	bonsai	4.45776	0.159016	-0.116425	0.0555468	0.0626893	0.069571	0.372861	0.346168	0.172259	0.999544
FBgn0026262	Taf3	6.69076	0.0467061	0.0310382	-0.0622026	0.726767	0.757551	0.537468	0.686089	0.48989	0.999544
FBgn0026263	bip1	2.77732	0.168526	-0.565619	-0.100422	0.66438	0.0636983	0.73231	0.665224	0.165698	0.999544
FBgn0026309	aft	3.83584	0.0350454	-0.0818861	-0.0357247	0.763044	0.353537	0.683295	0.696579	0.339123	0.999544
FBgn0026313	X11L	5.41038	-0.0146211	0.0953276	-0.0336576	0.851187	0.114037	0.567292	0.714796	0.207477	0.999544
FBgn0026314	Ugt35B1	4.25502	-0.378639	-0.431002	-0.307035	0.3292	0.145704	0.294347	0.560448	0.228642	0.999544
FBgn0026315	Ugt35A1	3.28285	-0.469932	-0.00557341	-0.103801	0.0191743	0.968642	0.466766	0.213468	0.548142	0.999544
FBgn0026316	Ubc10	5.55888	0.0817869	-0.126875	0.0127433	0.0976187	0.00169904	0.723717	0.411743	0.0345526	0.999544
FBgn0026317	Tsc1	5.72254	-0.0059343	-0.0969073	-0.0244994	0.926349	0.0545172	0.613024	0.730545	0.157066	0.999544
FBgn0026319	Traf4	2.90511	-0.0277775	0.192368	0.130208	0.82807	0.0556449	0.185375	0.708936	0.158022	0.999544
FBgn0026323	Tak1	5.57658	-0.00466115	-0.0494877	-0.0163484	0.939645	0.291451	0.724494	0.732897	0.310788	0.999544
FBgn0026324	Taf10b	3.3752	0.0202235	-0.198542	-0.000870189	0.776698	0.00110116	0.987058	0.699476	0.028318	0.999544
FBgn0026326	Mad1	3.71444	-0.0048694	-0.262191	-0.00665132	0.976902	0.0478141	0.958113	0.739419	0.149547	0.999544
FBgn0026361	Septin5	1.93405	-0.480119	-0.41626	-0.113948	0.2381	0.178701	0.707502	0.524187	0.249726	0.999544
FBgn0026369	Sara	6.13427	-0.0810485	0.0225834	0.04514	0.278317	0.684655	0.419515	0.538628	0.46776	0.999544
FBgn0026371	SAK	1.95627	0.264004	-0.415465	-0.129074	0.512649	0.17963	0.671057	0.618765	0.250596	0.999544
FBgn0026372	RpL23A	11.2758	-0.142801	-0.0601878	0.0757305	0.144075	0.405454	0.29739	0.465334	0.362057	0.999544
FBgn0026373	Rpb3	3.16507	0.109799	-0.164039	0.0511635	0.461107	0.150779	0.647125	0.602655	0.231408	0.999544
FBgn0026374	Rhp	2.05818	-0.270682	0.240692	-0.0151293	0.13589	0.081685	0.909795	0.459663	0.182243	0.999544
FBgn0026375	RhoGAPp190	5.9163	0.135907	0.01317	-0.0911513	0.240089	0.87788	0.293511	0.524753	0.525189	0.999544
FBgn0026376	Rgl	4.40085	0.0685554	0.234263	0.0332976	0.440169	0.00168158	0.616977	0.597584	0.0344752	0.999544
FBgn0026378	Rep	4.29293	-0.140444	0.00413763	0.0195103	0.113035	0.94909	0.763586	0.435599	0.542641	0.999544
FBgn0026379	Pten	4.58641	0.17884	0.106974	-0.103617	0.203656	0.309038	0.324118	0.504451	0.319993	0.999544
FBgn0026380	Prosbeta3	7.30013	0.0429083	-0.0533496	0.0279785	0.64643	0.450312	0.69081	0.658718	0.380538	0.999544
FBgn0026400	Noa36	4.64742	0.0804073	-0.150229	-0.0160518	0.313252	0.0176504	0.786828	0.553786	0.101645	0.999544
FBgn0026401	Nipped-B	6.65746	0.101609	0.178811	-0.0782401	0.413557	0.0639878	0.402916	0.589271	0.165782	0.999544
FBgn0026402	NiPp1	3.08249	0.0295918	-0.0932657	0.00812422	0.836642	0.391851	0.940049	0.711446	0.356659	0.999544
FBgn0026403	Ndg	3.89986	0.0564836	-0.255187	0.0506876	0.770791	0.0903955	0.728495	0.698284	0.189706	0.999544
FBgn0026404	Dronc	4.23486	-0.965358	-0.0197765	-0.0771458	0.000269262	0.907532	0.651189	0.0289781	0.532318	0.999544
FBgn0026409	Mpcp2	10.162	0.0400784	-0.034712	0.0937869	0.734926	0.696863	0.297697	0.68814	0.471227	0.999544
FBgn0026415	Idgf4	8.71028	-0.354542	-0.296387	-0.0979682	0.0621248	0.0399177	0.478339	0.344838	0.137661	0.999544
FBgn0026417	Hus1-like	2.02261	0.0104553	-0.0415901	-0.0850328	0.933023	0.658021	0.368803	0.73143	0.457547	0.999544
FBgn0026418	Hsc70Cb	7.57733	-0.0922717	-0.104765	-0.0564508	0.337953	0.15346	0.434314	0.562864	0.232797	0.999544
FBgn0026427	Su(var)2-HP2	5.36241	0.00821642	0.0755534	-0.0730187	0.950004	0.446505	0.461711	0.734288	0.378744	0.999544
FBgn0026428	HDAC6	8.64096	-0.0554132	-0.059896	0.0137752	0.699526	0.579955	0.898382	0.677775	0.431739	0.999544
FBgn0026430	Grip84	4.65108	0.440976	-0.23097	-0.0463743	0.236962	0.406597	0.866671	0.522919	0.362478	0.999544
FBgn0026431	Grip75	3.31898	0.0362828	-0.145472	-0.0342633	0.802124	0.1904	0.753399	0.705035	0.25673	0.999544
FBgn0026432	Grip163	3.13213	0.0913504	-0.0605379	-0.0676558	0.518172	0.569143	0.524989	0.620802	0.428408	0.999544
FBgn0026433	Grip128	3.86733	0.185668	-0.238637	-0.0787477	0.457837	0.210245	0.674424	0.602489	0.266932	0.999544
FBgn0026438	Eaat2	1.74364	0.0143546	-0.0494492	0.0455312	0.947266	0.762691	0.780959	0.73391	0.491509	0.999544
FBgn0026439	Eaat1	7.7008	-0.123526	0.126339	-0.0299383	0.379037	0.235213	0.775193	0.577441	0.280981	0.999544
FBgn0026441	ear	4.33321	0.0727808	-0.0955188	-0.0543449	0.474243	0.217322	0.477627	0.607039	0.26973	0.999544
FBgn0026479	Drp1	6.67727	-0.165168	-0.0203189	-0.0253358	0.105339	0.785133	0.734013	0.422617	0.497878	0.999544
FBgn0026533	Dek	6.38008	0.119324	-0.0115777	-0.032738	0.306012	0.893753	0.706085	0.549929	0.528811	0.999544
FBgn0026562	SPARC	9.48556	-0.0410114	0.021659	0.0623497	0.769881	0.837243	0.555663	0.698258	0.51433	0.999544
FBgn0026565	Ass	4.76847	-0.116992	-0.543246	-0.064108	0.551098	0.00112269	0.663653	0.631487	0.0283536	0.999544
FBgn0026566	CG1307	4.99205	0.219058	-0.167031	0.00316869	0.0526024	0.0497716	0.968964	0.319672	0.151859	0.999544
FBgn0026570	CG5704	3.80107	-0.183613	0.0912648	0.0331072	0.225122	0.418807	0.76785	0.51394	0.366572	0.999544
FBgn0026573	ADD1	4.44804	0.0859291	-0.0538301	-0.0678343	0.615905	0.675946	0.598794	0.648922	0.464321	0.999544
FBgn0026575	hang	6.18799	0.0118733	-0.188403	-0.0358119	0.934338	0.0925702	0.741502	0.731724	0.191736	0.999544
FBgn0026576	Pisd	7.67999	-0.111333	-0.280704	-0.0256782	0.424567	0.0122307	0.805389	0.592157	0.0846815	0.999544
FBgn0026577	CG8677	5.62797	0.0493369	0.0327871	-0.0558008	0.679251	0.714853	0.535249	0.670664	0.476479	0.999544
FBgn0026582	Hmg-2	2.50845	-0.124125	-0.16521	-0.0281116	0.234508	0.0419023	0.71692	0.521459	0.14036	0.999544
FBgn0026592	Fie	2.94145	0.119939	0.290951	0.0160699	0.422114	0.0151174	0.885754	0.591442	0.0954246	0.999544
FBgn0026593	CG5707	6.58604	-0.208175	-0.493301	-0.0918371	0.2994	0.00287781	0.539715	0.547743	0.0461628	0.999544
FBgn0026597	Axn	5.01148	0.185929	-0.164414	-0.034665	0.223647	0.155245	0.759346	0.513756	0.233309	0.999544
FBgn0026598	Apc2	3.93064	0.017577	-0.351412	-0.100558	0.957533	0.166587	0.686324	0.735417	0.241885	0.999544
FBgn0026602	Adk3	4.32141	-0.622224	-0.0686761	0.0565458	0.00148524	0.600763	0.666248	0.0646063	0.438821	0.999544
FBgn0026616	alpha-Man-IIb	2.87229	0.461576	-0.284732	-0.107241	0.178167	0.267169	0.672313	0.487972	0.299068	0.999544
FBgn0026619	Taz	5.67791	-0.453768	0.0689097	0.0557818	0.000510356	0.421613	0.514293	0.0386717	0.367902	0.999544
FBgn0026620	tacc	6.87751	-0.0983043	0.151955	0.0276986	0.217327	0.0159305	0.639151	0.510718	0.0976402	0.999544
FBgn0026630	nes	6.56505	-0.190171	0.0637254	-0.0301742	0.0806604	0.42379	0.703292	0.38089	0.368676	0.999544
FBgn0026634	Cog2	4.43645	0.0819495	0.0232068	0.0126808	0.140437	0.570931	0.756226	0.465334	0.429364	0.999544
FBgn0026666	MagR	3.8771	-0.0399415	0.0107904	-0.0427974	0.66238	0.87523	0.535108	0.664156	0.524775	0.999544
FBgn0026679	IntS4	4.14047	0.02898	-0.162927	-0.0193773	0.734006	0.017312	0.762666	0.688091	0.10053	0.999544
FBgn0026702	Pop1	3.34247	0.523344	-0.068879	0.0652774	0.0458226	0.715114	0.729369	0.303834	0.476587	0.999544
FBgn0026713	Prp16	5.09366	0.0604732	-0.0277427	0.00256848	0.411008	0.614499	0.962702	0.588114	0.442871	0.999544
FBgn0026718	Agpat2	6.33459	0.0703323	-0.0794142	-0.0211674	0.73765	0.61577	0.893306	0.688773	0.443327	0.999544
FBgn0026721	fat-spondin	7.80023	-0.254982	-0.0487893	0.00051699	0.0902154	0.656833	0.996235	0.398997	0.457114	0.999544
FBgn0026722	drosha	4.42644	0.0554732	-0.093187	-0.0264029	0.676752	0.355746	0.791776	0.669414	0.340489	0.999544
FBgn0026737	CG6171	2.89234	0.210694	-0.322504	-0.115055	0.241705	0.0229748	0.393022	0.524884	0.111112	0.999544
FBgn0026738	CG7857	3.51029	0.00537605	-0.129915	0.0410397	0.952442	0.0655985	0.546998	0.734386	0.167179	0.999544
FBgn0026741	mRpL18	3.27571	0.238875	-0.243066	-0.0819787	0.0959081	0.0280864	0.436691	0.409363	0.120394	0.999544
FBgn0026749	Yippee	4.74008	-0.0330718	-0.00631849	0.00223241	0.738457	0.932358	0.976074	0.689329	0.538712	0.999544
FBgn0026751	XRCC1	3.55968	0.042658	-0.146441	-0.0767018	0.770464	0.19155	0.487861	0.698284	0.256881	0.999544
FBgn0026761	Trap1	5.92881	-0.0192548	-0.124592	0.0112964	0.73872	0.00812796	0.794713	0.689476	0.0701692	0.999544
FBgn0026777	Rad23	7.16637	-0.0345829	0.0256267	-0.0421659	0.591921	0.597525	0.387544	0.642453	0.43758	0.999544
FBgn0026778	Rad1	0.937656	0.299905	-0.616662	-0.040128	0.302835	0.00920215	0.854524	0.549097	0.0743694	0.999544
FBgn0026787	Nhe1	4.85897	-0.0251602	0.02191	-0.0443904	0.72968	0.689359	0.420615	0.68651	0.468835	0.999544
FBgn0026869	Tdg	6.77354	0.0299724	0.179835	0.010294	0.702309	0.00531089	0.86133	0.678726	0.0600305	0.999544
FBgn0026872	CG14777	5.48522	-0.00360785	0.0578739	0.0385957	0.975005	0.506294	0.656707	0.73874	0.404073	0.999544
FBgn0026873	MED18	3.31723	0.149104	-0.174991	0.0346468	0.194624	0.0487839	0.683838	0.49782	0.151026	0.999544
FBgn0026876	CG11403	2.17142	0.270939	-0.275015	-0.120658	0.489065	0.353851	0.681813	0.613671	0.33929	0.999544
FBgn0026878	CG4325	1.61472	0.40032	0.00989876	-0.105109	0.0403628	0.943725	0.456359	0.287147	0.541419	0.999544
FBgn0026879	CG13364	5.77991	0.0672174	-0.114419	0.0804651	0.369444	0.0499562	0.158928	0.574372	0.15204	0.999544
FBgn0027052	STUB1	5.20869	0.152631	-0.0842976	0.0184899	0.0483653	0.139365	0.739872	0.309603	0.22638	0.999544
FBgn0027053	CSN5	4.70323	0.0592989	-0.0653214	-0.0230392	0.472196	0.295778	0.709295	0.60681	0.313271	0.999544
FBgn0027054	CSN4	5.08261	0.125724	-0.168379	-1.79e-05	0.236376	0.0412465	0.999818	0.522801	0.139026	0.999818
FBgn0027055	CSN3	5.04639	-0.0318076	-0.0460897	0.0251998	0.545376	0.249415	0.524509	0.629364	0.288044	0.999544
FBgn0027057	CSN1b	5.28771	0.0013634	-0.0848202	0.048823	0.981532	0.0656645	0.277082	0.740529	0.167179	0.999544
FBgn0027066	Eb1	6.52057	0.0370879	0.00234223	-0.0601535	0.593575	0.964159	0.255484	0.642967	0.547185	0.999544
FBgn0027070	Ugt36E1	4.85082	-0.230051	-0.142767	0.00523402	0.0237235	0.0576214	0.942164	0.235035	0.160037	0.999544
FBgn0027073	Ugt49B1	7.63003	-0.159554	0.0640287	0.0117647	0.355439	0.619704	0.927149	0.570502	0.444578	0.999544
FBgn0027079	ValRS	6.32529	0.0183158	0.0432908	0.0557211	0.791495	0.409556	0.29088	0.702989	0.363529	0.999544
FBgn0027080	TyrRS	6.72524	-0.147051	0.0493601	0.0727503	0.0494447	0.363995	0.185579	0.310414	0.343662	0.999544
FBgn0027081	ThrRS	6.82056	0.122594	-0.0306171	0.0553252	0.239574	0.692218	0.47619	0.524374	0.469545	0.999544
FBgn0027082	ProRS-m	2.47106	0.160277	-0.0627765	-0.00104496	0.109866	0.395828	0.98863	0.432076	0.357999	0.999544
FBgn0027083	MetRS-m	2.59838	0.0481925	-0.242222	-0.0718895	0.737985	0.0339965	0.509571	0.688987	0.129429	0.999544
FBgn0027084	LysRS	6.21173	0.129228	-0.161549	0.0246417	0.40954	0.176308	0.833268	0.587652	0.248242	0.999544
FBgn0027085	LeuRS-m	4.7417	0.00766904	-0.0537632	0.0320994	0.899127	0.244782	0.483106	0.727256	0.286074	0.999544
FBgn0027086	IleRS	7.19829	0.184015	0.0577814	0.0899018	0.0962038	0.476163	0.271465	0.410019	0.390871	0.999544
FBgn0027087	HisRS	6.76595	-0.138941	0.0452547	-0.0130747	0.0964422	0.460407	0.830168	0.410373	0.383854	0.999544
FBgn0027088	GlyRS	5.95886	0.0918485	-0.0395744	-0.00471011	0.365023	0.601701	0.950314	0.573708	0.43894	0.999544
FBgn0027090	GlnRS	5.9722	0.238665	-0.108488	0.0139646	0.0214661	0.149218	0.849268	0.224934	0.230517	0.999544
FBgn0027091	CysRS	4.98254	0.0234985	-0.176865	-0.0678668	0.816495	0.0280545	0.377048	0.708091	0.120394	0.999544
FBgn0027093	ArgRS	5.4847	0.0330455	-0.0698092	-0.00658469	0.717046	0.313801	0.923436	0.683491	0.322256	0.999544
FBgn0027094	AlaRS	7.26638	0.0297624	0.0390111	0.0317128	0.696052	0.497687	0.580784	0.676389	0.400853	0.999544
FBgn0027095	Manf	5.41404	-0.0429736	-0.0730524	-0.0486584	0.611341	0.256532	0.446128	0.647453	0.292414	0.999544
FBgn0027101	Dyrk3	5.87991	-0.0637115	0.134376	-0.0809331	0.650476	0.211126	0.446251	0.660468	0.267127	0.999544
FBgn0027106	Inx7	3.23123	-0.0966712	0.100794	-0.0969078	0.72641	0.628489	0.641723	0.686089	0.447849	0.999544
FBgn0027108	Inx2	6.32266	0.0488943	-0.0703757	-0.0112277	0.588502	0.304921	0.86847	0.641093	0.318104	0.999544
FBgn0027111	miple1	1.49007	0.210429	0.222891	-0.107738	0.545478	0.398287	0.681193	0.629364	0.359323	0.999544
FBgn0027259	Kmn1	0.839474	1.33946	-0.238073	-0.269861	0.024729	0.576554	0.527157	0.238738	0.430551	0.999544
FBgn0027279	l(1)G0196	7.60615	-0.095864	0.113066	-0.0336792	0.628707	0.450221	0.821015	0.653016	0.380538	0.999544
FBgn0027280	l(1)G0193	7.20097	0.166362	0.1722	0.00507282	0.00477784	0.000274376	0.900138	0.118932	0.0129547	0.999544
FBgn0027287	Gmap	4.99277	0.100628	0.155657	-0.0977598	0.436595	0.117419	0.317358	0.596688	0.210255	0.999544
FBgn0027291	Idh3a	8.03665	0.25991	0.0592566	0.103056	0.0193295	0.453041	0.197514	0.213468	0.380844	0.999544
FBgn0027296	temp	3.86509	0.0827774	-0.102081	0.00169736	0.368139	0.146312	0.980258	0.57429	0.228883	0.999544
FBgn0027329	CCT6	6.54606	0.0941315	-0.170705	-0.0251581	0.631633	0.253716	0.864478	0.653869	0.2904	0.999544
FBgn0027330	l(1)G0020	4.56486	0.348525	0.0217736	-0.0797438	0.100077	0.888024	0.607075	0.41228	0.527069	0.999544
FBgn0027334	l(1)G0004	4.71211	0.0230863	-0.0940667	0.0187187	0.789477	0.157316	0.77361	0.702107	0.234619	0.999544
FBgn0027335	Rip11	6.4544	0.0530714	0.0942181	-0.0175445	0.560568	0.177016	0.797572	0.633203	0.248663	0.999544
FBgn0027338	Kap-alpha3	8.40659	0.017015	-0.01139	0.0170936	0.772356	0.796853	0.699523	0.698586	0.501235	0.999544
FBgn0027339	jim	5.88024	0.00702571	0.175589	0.0227045	0.951752	0.0541374	0.795112	0.734386	0.15689	0.999544
FBgn0027342	fz4	3.63055	0.314884	-0.289311	-0.0841007	0.149914	0.0822739	0.602128	0.471631	0.182527	0.999544
FBgn0027343	fz3	2.00245	0.355733	0.152484	-0.0216601	0.00947345	0.12071	0.820835	0.1587	0.213112	0.999544
FBgn0027348	bgm	9.20522	-0.22569	-0.0398674	0.0426156	0.20403	0.761569	0.74572	0.504451	0.491442	0.999544
FBgn0027356	Amph	7.29898	-0.101349	0.197573	-0.00981712	0.259087	0.00651081	0.88284	0.531648	0.0642463	0.999544
FBgn0027358	Tim9b	2.97251	0.134321	-0.0606441	-0.0782838	0.260308	0.495798	0.380927	0.532435	0.399833	0.999544
FBgn0027359	Tim8	5.30901	-0.110249	-0.0269256	0.0218502	0.262537	0.712618	0.764888	0.533504	0.47609	0.999544
FBgn0027360	Tim10	5.09843	0.133688	-0.0978895	-0.0281593	0.0773884	0.0851279	0.609417	0.376736	0.184056	0.999544
FBgn0027363	Stam	6.99868	-0.222049	0.1918	0.00528974	0.110082	0.0690318	0.958459	0.432539	0.171762	0.999544
FBgn0027364	Six4	0.954631	2.6596	0.609206	-0.102016	0.142706	0.653577	0.939958	0.465334	0.45582	0.999544
FBgn0027375	RecQ5	5.26474	0.282864	0.000842576	-0.0131822	0.0124151	0.991508	0.867788	0.178202	0.554106	0.999544
FBgn0027378	MRG15	4.05274	0.014303	-0.201534	0.035162	0.880889	0.00948074	0.625402	0.724097	0.0744674	0.999544
FBgn0027453	Dnz1	3.93166	0.000579498	-0.108581	-0.0775923	0.995503	0.169709	0.321456	0.744368	0.244033	0.999544
FBgn0027490	D12	2.78023	0.193521	-0.374554	-0.0172061	0.380768	0.0315272	0.917015	0.578664	0.126024	0.999544
FBgn0027492	wdb	7.58958	0.137365	0.0495584	0.0061262	0.124769	0.452453	0.925533	0.449457	0.380795	0.999544
FBgn0027493	AdSS	7.67349	-0.0293017	0.0694867	0.0274361	0.687445	0.212071	0.616976	0.674129	0.267127	0.999544
FBgn0027495	Smyd4-4	4.41806	0.248687	-0.177894	-0.0388513	0.13054	0.149647	0.747565	0.454443	0.230569	0.999544
FBgn0027496	epsilonCOP	5.14962	0.0184392	-0.115688	-0.0327815	0.787426	0.0327753	0.525606	0.702102	0.127646	0.999544
FBgn0027497	Madm	2.17134	0.772638	-1.56616	1.01007	0.673108	0.298346	0.499289	0.66706	0.31462	0.999544
FBgn0027498	CG2061	3.65556	0.0190559	-0.168577	0.0471319	0.877329	0.0798771	0.613019	0.722941	0.180407	0.999544
FBgn0027499	wde	4.56958	0.121439	-0.238641	-0.0585463	0.475427	0.070985	0.646382	0.60752	0.173114	0.999544
FBgn0027500	spd-2	2.6829	1.15242	-0.760818	-0.218262	0.343103	0.407171	0.810697	0.563755	0.362749	0.999544
FBgn0027503	CG11970	4.7182	0.0513459	0.126928	-0.0253209	0.562525	0.0662152	0.703691	0.633203	0.167921	0.999544
FBgn0027504	CG8878	4.86718	0.1253	-0.087211	-0.0925371	0.433752	0.468575	0.442195	0.596553	0.387193	0.999544
FBgn0027505	Rab3-GAP	5.21459	-0.101859	0.119405	0.0188696	0.127208	0.0216886	0.700234	0.452205	0.109467	0.999544
FBgn0027506	EDTP	7.4707	-0.161567	0.189931	-0.00695461	0.361752	0.159657	0.957996	0.573144	0.236379	0.999544
FBgn0027507	CG1344	5.50689	-0.0597513	-0.069385	-0.0253279	0.325058	0.134466	0.576451	0.558761	0.222281	0.999544
FBgn0027508	Tnks	4.98399	-0.175718	0.0369527	-0.0420641	0.00936667	0.435276	0.375444	0.158636	0.373612	0.999544
FBgn0027509	TBCD	4.16187	0.0852507	-0.111935	-0.0353635	0.482755	0.225891	0.697725	0.610856	0.275372	0.999544
FBgn0027512	CG10254	6.12106	0.561123	-0.195241	-0.132894	0.222341	0.567392	0.696497	0.512742	0.428025	0.999544
FBgn0027513	ana2	0.381095	0.89098	-0.768534	0.0171429	0.291576	0.233549	0.978455	0.544745	0.280144	0.999544
FBgn0027514	CG1024	3.26496	-0.0918309	0.011319	0.0275247	0.310455	0.866625	0.683449	0.553306	0.52312	0.999544
FBgn0027515	CG7115	5.53043	0.0469445	-0.110264	-0.0129413	0.534359	0.0613159	0.819245	0.626041	0.162855	0.999544
FBgn0027518	Wdr24	3.74735	0.08043	-0.181474	-0.0284658	0.418598	0.0215878	0.702099	0.590813	0.109299	0.999544
FBgn0027521	CG3679	1.24088	1.57284	-0.940445	-0.135688	0.33804	0.450656	0.912779	0.562864	0.380538	0.999544
FBgn0027524	CG3909	3.84082	0.0141221	-0.104758	-0.015291	0.88358	0.15825	0.833202	0.724454	0.235289	0.999544
FBgn0027525	LTV1	8.24087	-0.219633	0.083822	0.0880819	0.0143653	0.191726	0.170953	0.188788	0.256934	0.999544
FBgn0027526	Ublcp1	4.31572	-0.0628571	-0.12305	-0.0225955	0.440129	0.0528218	0.710863	0.597584	0.155685	0.999544
FBgn0027528	goe	5.57841	-0.00073241	0.0857111	-0.00165969	0.995116	0.345984	0.985292	0.744368	0.336258	0.999544
FBgn0027529	tapas	6.13247	0.0573372	0.042015	-0.0347967	0.704308	0.711667	0.759402	0.679313	0.47595	0.999544
FBgn0027532	CG7139	5.75468	0.174483	0.082019	-0.0735582	0.137967	0.346789	0.397871	0.462548	0.336421	0.999544
FBgn0027535	botv	5.17175	-0.194836	-0.0333689	0.0285183	0.0600267	0.656437	0.703645	0.338381	0.456969	0.999544
FBgn0027537	Nup93-1	4.86481	0.234916	-0.189297	0.00818382	0.243352	0.212544	0.956252	0.525373	0.267127	0.999544
FBgn0027538	beta4GalNAcTA	4.27729	0.014914	-0.124865	0.0400074	0.824278	0.0202346	0.431635	0.708936	0.10699	0.999544
FBgn0027539	lili	4.30846	0.0218059	-0.263223	-0.113174	0.881228	0.0238532	0.308431	0.724159	0.112529	0.999544
FBgn0027544	CG2217	1.66933	-0.211669	0.0264189	-0.258078	0.538895	0.918752	0.32433	0.627944	0.535144	0.999544
FBgn0027546	CG4766	1.80914	-0.117197	0.119278	0.0810312	0.501161	0.365886	0.537011	0.615983	0.344777	0.999544
FBgn0027547	CG1927	6.88916	-0.0629188	0.0022383	-0.0391436	0.381563	0.966713	0.468178	0.579329	0.547626	0.999544
FBgn0027548	nito	5.47257	-0.041093	-0.112957	-0.0456738	0.745332	0.242178	0.631864	0.690976	0.284954	0.999544
FBgn0027549	Nulp1	5.32486	0.100389	-0.0608047	-0.00506794	0.0757167	0.147793	0.901677	0.372387	0.229662	0.999544
FBgn0027550	CG6495	5.79473	0.110887	0.364083	0.112435	0.666875	0.069923	0.562559	0.665924	0.172327	0.999544
FBgn0027552	CG10863	6.86714	0.442377	-0.344712	-0.0255767	0.0786538	0.0692711	0.888679	0.379107	0.171809	0.999544
FBgn0027553	NELF-B	3.21137	0.166906	-0.084736	0.0130788	0.142843	0.316765	0.875832	0.465334	0.324126	0.999544
FBgn0027554	CG8042	5.8416	-0.0397649	0.0424818	-0.00263609	0.587537	0.442765	0.961759	0.640803	0.377019	0.999544
FBgn0027556	CG4928	6.20734	0.0382725	0.255515	0.0530383	0.883382	0.201356	0.787168	0.724454	0.262125	0.999544
FBgn0027558	Pgant3	4.60693	-0.0560617	0.179488	-0.000613937	0.60815	0.0374175	0.994029	0.646094	0.13402	0.999544
FBgn0027560	Tps1	12.4701	-0.323873	0.0791535	0.113399	0.0383323	0.482078	0.316699	0.280353	0.393798	0.999544
FBgn0027561	CG18659	6.58698	-0.195773	0.134767	-0.0694143	0.246626	0.287997	0.580641	0.526568	0.309345	0.999544
FBgn0027562	CG10345	2.72745	-0.421826	0.123852	-0.0157095	0.0213853	0.345221	0.903749	0.224772	0.335756	0.999544
FBgn0027563	CG9631	5.79753	-0.376161	0.147729	0.065065	0.00819521	0.144015	0.511709	0.150725	0.228161	0.999544
FBgn0027564	CG3149	4.99149	-0.153896	0.0163143	0.0377002	0.0848365	0.801789	0.563053	0.389551	0.502786	0.999544
FBgn0027565	CG5498	5.19079	0.0971346	0.0288746	0.0508487	0.117309	0.526412	0.269083	0.441881	0.411745	0.999544
FBgn0027567	CG8108	7.20252	-0.0594842	0.0917717	-0.0663527	0.564816	0.243384	0.395521	0.633203	0.285737	0.999544
FBgn0027568	Cand1	5.6862	-0.134436	-0.0277588	0.0188864	0.256902	0.752485	0.830004	0.530928	0.488148	0.999544
FBgn0027569	cert	5.48939	-0.271592	0.13492	-0.0509944	0.066145	0.215261	0.634467	0.353411	0.268477	0.999544
FBgn0027570	Nep2	4.68904	-0.294492	-0.0176736	0.0761558	0.34461	0.939305	0.74312	0.56453	0.540356	0.999544
FBgn0027572	ACOX1	6.86384	-0.42266	0.177995	-0.0378489	0.0105672	0.132452	0.742968	0.164597	0.221594	0.999544
FBgn0027574	CG5815	3.63724	0.0921551	0.0723683	0.0520008	0.401894	0.382218	0.528357	0.587243	0.352579	0.999544
FBgn0027575	GABA-B-R2	2.02917	0.0894593	0.197552	-0.0162341	0.675132	0.22645	0.919502	0.668217	0.275712	0.999544
FBgn0027578	Nepl21	7.45915	-0.59061	0.0885274	0.10382	0.000526483	0.429004	0.354922	0.0394352	0.371352	0.999544
FBgn0027579	mino	9.15973	-0.135762	0.222866	0.0670696	0.286227	0.0260365	0.480612	0.542056	0.116634	0.999544
FBgn0027580	PCB	9.39479	0.150974	-0.0132916	0.0544414	0.217702	0.883355	0.54941	0.510751	0.52636	0.999544
FBgn0027581	CG6191	6.168	-0.00611635	0.112295	0.0105322	0.952542	0.155862	0.891681	0.734386	0.233309	0.999544
FBgn0027582	CG6230	6.11315	0.0190245	-0.0265592	0.0111379	0.742457	0.543281	0.798109	0.690821	0.417915	0.999544
FBgn0027583	CG7601	4.64674	-0.117049	-0.127357	-0.0289863	0.218238	0.0803127	0.680712	0.510751	0.180719	0.999544
FBgn0027584	CG4757	2.88309	0.643274	-0.124127	-0.210141	0.0529911	0.605941	0.385117	0.319672	0.440319	0.999544
FBgn0027585	CG8740	6.61448	0.0293937	0.297685	0.0316781	0.86888	0.0347759	0.813156	0.720224	0.130737	0.999544
FBgn0027586	CG5867	6.29058	-0.19547	0.021899	-0.0174846	0.128695	0.816438	0.852933	0.452222	0.508402	0.999544
FBgn0027587	Prp4k	4.76343	0.0941843	-0.105753	-0.128115	0.520551	0.340426	0.250365	0.621967	0.334266	0.999544
FBgn0027588	GCS2alpha	7.05585	0.0104509	-0.168897	-0.0627425	0.903139	0.0147051	0.336571	0.727422	0.0940434	0.999544
FBgn0027590	GstE12	8.42373	-0.107463	-0.15376	0.0357551	0.478947	0.184507	0.753137	0.608637	0.25322	0.999544
FBgn0027592	MED15	4.25201	0.0216776	-0.206236	0.000755447	0.830587	0.01193	0.992091	0.709227	0.083875	0.999544
FBgn0027594	drpr	7.71814	-0.220397	0.320726	0.0316852	0.214637	0.0215881	0.809448	0.509916	0.109299	0.999544
FBgn0027596	Kank	6.00445	-0.0437269	0.0938988	-0.0807657	0.795356	0.46161	0.525924	0.703901	0.384231	0.999544
FBgn0027597	CG17712	2.97241	0.151232	-0.207123	-0.0593881	0.274889	0.0538662	0.565419	0.537512	0.156774	0.999544
FBgn0027598	cindr	6.22468	-0.127916	0.042004	-0.120087	0.29198	0.642218	0.191617	0.544745	0.453172	0.999544
FBgn0027599	CG2790	4.31276	0.0272539	-0.0146413	-0.00566523	0.650744	0.746263	0.900264	0.660523	0.486343	0.999544
FBgn0027600	obst-B	4.23879	0.431566	0.53256	0.189682	0.00626458	5.76e-05	0.0919514	0.136477	0.00583112	0.999544
FBgn0027601	pdgy	7.47229	0.132832	0.132779	-0.0859944	0.302631	0.174727	0.373663	0.549097	0.247346	0.999544
FBgn0027602	CG8611	4.45567	0.0595897	0.0908268	-0.0967541	0.742034	0.506568	0.479528	0.690821	0.404122	0.999544
FBgn0027603	Ulp1	5.93245	0.03494	0.00359163	-0.0311082	0.629868	0.947372	0.568932	0.653647	0.542231	0.999544
FBgn0027607	CG8230	6.0714	0.00527384	0.0636894	0.0338025	0.921499	0.123708	0.404895	0.730545	0.214439	0.999544
FBgn0027608	CG2082	3.31842	0.162369	0.228807	0.127163	0.484615	0.19714	0.467723	0.61202	0.259542	0.999544
FBgn0027609	morgue	3.44697	-0.00935972	-0.158456	0.029375	0.919548	0.0313361	0.674331	0.730406	0.126002	0.999544
FBgn0027610	Dic1	8.08107	0.111759	0.0717047	0.100529	0.365186	0.43888	0.280907	0.573708	0.375222	0.999544
FBgn0027611	LManII	9.29559	-0.0818246	-0.00531249	-0.00929573	0.507414	0.954162	0.91989	0.617567	0.544131	0.999544
FBgn0027615	OXA1L	4.53466	0.177169	-0.271647	0.023168	0.183343	0.0103841	0.813593	0.490879	0.0770553	0.999544
FBgn0027616	Ythdc1	5.38744	0.0210433	0.0244125	0.0130062	0.844407	0.762339	0.871909	0.713146	0.491494	0.999544
FBgn0027617	CG5808	2.92117	0.0280651	-0.179033	-0.0201508	0.879747	0.2082	0.885338	0.723581	0.26602	0.999544
FBgn0027619	eIF3j	6.69126	-0.0622881	-0.0647248	-0.0732558	0.414382	0.262882	0.206862	0.589271	0.296436	0.999544
FBgn0027620	Acf	4.65711	0.183902	-0.403247	-0.159278	0.505692	0.061202	0.444409	0.617567	0.162855	0.999544
FBgn0027621	Pfrx	8.81457	-0.216751	0.128609	0.127821	0.118864	0.21406	0.216783	0.443594	0.267942	0.999544
FBgn0027654	jdp	3.77888	-0.0925396	0.0833351	-0.0642003	0.603838	0.535283	0.632325	0.644743	0.414857	0.999544
FBgn0027655	htt	6.34022	-0.18905	0.147835	0.0121279	0.0461425	0.0388901	0.858782	0.304436	0.135851	0.999544
FBgn0027657	glob1	8.23765	-1.09897	-0.132699	0.0452012	0.000541389	0.524162	0.827547	0.0396405	0.410844	0.999544
FBgn0027660	blot	5.85989	0.090697	0.0349786	0.00700902	0.509987	0.734664	0.945786	0.618415	0.482602	0.999544
FBgn0027779	VhaSFD	7.64786	-0.0361177	0.0485883	0.0108117	0.710454	0.508306	0.882431	0.681502	0.404514	0.999544
FBgn0027780	Aasdh	3.65164	0.0805678	-0.00307485	0.00565759	0.631878	0.98057	0.964259	0.653869	0.551676	0.999544
FBgn0027783	SMC2	3.08085	-0.236626	-0.400578	-0.156402	0.598117	0.242843	0.644047	0.644151	0.285238	0.999544
FBgn0027784	Prp18	3.3053	-0.00943546	-0.165036	-0.0116374	0.909326	0.013689	0.852059	0.728711	0.0900328	0.999544
FBgn0027785	NP15.6	6.92179	0.125787	-0.128948	0.0833459	0.262393	0.131291	0.32216	0.533504	0.220832	0.999544
FBgn0027786	Mtch	6.24751	0.0573939	-0.0672734	-0.000461641	0.259126	0.0847539	0.990235	0.531648	0.183689	0.999544
FBgn0027790	GV1	4.43661	-0.268281	-0.033249	0.0430136	0.0477298	0.733346	0.659692	0.307557	0.482165	0.999544
FBgn0027791	O-fut2	3.64312	0.251658	-0.251846	0.0481953	0.0111522	0.00129464	0.489013	0.16779	0.0299643	0.999544
[truncated: 6,702 more rows]
