# Supplementary material for: Evolutionary adaptation to juvenile malnutrition impacts adult metabolism and impairs adult fitness in Drosophila
Source: eLife. 2023 Oct 17;12:e92465. doi: 10.7554/eLife.92465 (PMC10637773; doi:10.7554/eLife.92465)
Supplement: Supplementary file 8. — The table includes the original estimates of peak area (in arbitrary units) normalized to the sample protein content, and log10-transformed, zero-centered, and Pareto-scaled values used for the analysis (zero-centering and Pareto-scaling was done separately for each batch). The table includes the 13 outlier data points that were removed from the final analysis because their Studentized residuals exceeded ±4; these outliers are identified in the last column. [file elife-92465-supp8.xlsx]

## Sheet: Legend
Supplementary file 8
Data on metabolite abundance. The table includes the original estimates of peak area (in arbitrary units) normalized to the sample protein content, and log10-transformed, zero-centered and Pareto-scaled values used for the analysis (zero-centering and Pareto-scaling was done separately for each batch). The table includes the 13 outlier data points that were removed from the final analysis because…

## Sheet: Carcass metabolite abundance
Metabolite	Sample_ID	Regime	Population	LarvalDiet	AdultStarvationTreament	Batch	NormalizedPeakArea	ParetoScaledLog10Concentration	Outlier
2-PHOSPHOGLYCERATE/3-PHOSPHOGLYCERATE	A201_1	CONTROL	C1	standard	fed	Two	309543	0.449962	no
2-PHOSPHOGLYCERATE/3-PHOSPHOGLYCERATE	A202_2	CONTROL	C2	standard	fed	Two	181459	-0.0110187	no
2-PHOSPHOGLYCERATE/3-PHOSPHOGLYCERATE	A203_3	CONTROL	C3	standard	fed	Two	308896	0.448156	no
2-PHOSPHOGLYCERATE/3-PHOSPHOGLYCERATE	A204_4	CONTROL	C4	standard	fed	Two	110475	-0.439356	no
2-PHOSPHOGLYCERATE/3-PHOSPHOGLYCERATE	A205_5	CONTROL	C5	standard	fed	Two	314521	0.463732	no
2-PHOSPHOGLYCERATE/3-PHOSPHOGLYCERATE	A206_6	CONTROL	C6	standard	fed	Two	208824	0.110221	no
2-PHOSPHOGLYCERATE/3-PHOSPHOGLYCERATE	A225_7	SELECTED	S1	standard	fed	Two	398172	0.667294	no
2-PHOSPHOGLYCERATE/3-PHOSPHOGLYCERATE	A226_8	SELECTED	S2	standard	fed	Two	263379	0.31056	no
2-PHOSPHOGLYCERATE/3-PHOSPHOGLYCERATE	A227_9	SELECTED	S3	standard	fed	Two	426492	0.726601	no
2-PHOSPHOGLYCERATE/3-PHOSPHOGLYCERATE	A228_10	SELECTED	S4	standard	fed	Two	286256	0.382456	no
2-PHOSPHOGLYCERATE/3-PHOSPHOGLYCERATE	A229_11	SELECTED	S5	standard	fed	Two	210125	0.115583	no
2-PHOSPHOGLYCERATE/3-PHOSPHOGLYCERATE	A230_12	SELECTED	S6	standard	fed	Two	143071	-0.216183	no
2-PHOSPHOGLYCERATE/3-PHOSPHOGLYCERATE	A401_25	CONTROL	C1	poor	fed	Two	138763	-0.24257	no
2-PHOSPHOGLYCERATE/3-PHOSPHOGLYCERATE	A402_26	CONTROL	C2	poor	fed	Two	182818	-0.0045793	no
2-PHOSPHOGLYCERATE/3-PHOSPHOGLYCERATE	A403_27	CONTROL	C3	poor	fed	Two	182211	-0.00745007	no
2-PHOSPHOGLYCERATE/3-PHOSPHOGLYCERATE	A404_28	CONTROL	C4	poor	fed	Two	421117	0.715654	no
2-PHOSPHOGLYCERATE/3-PHOSPHOGLYCERATE	A405_29	CONTROL	C5	poor	fed	Two	139262	-0.239478	no
2-PHOSPHOGLYCERATE/3-PHOSPHOGLYCERATE	A406_30	CONTROL	C6	poor	fed	Two	298914	0.419803	no
2-PHOSPHOGLYCERATE/3-PHOSPHOGLYCERATE	A425_31	SELECTED	S1	poor	fed	Two	310239	0.4519	no
2-PHOSPHOGLYCERATE/3-PHOSPHOGLYCERATE	A426_32	SELECTED	S2	poor	fed	Two	376193	0.618282	no
2-PHOSPHOGLYCERATE/3-PHOSPHOGLYCERATE	A427_33	SELECTED	S3	poor	fed	Two	396021	0.662617	no
2-PHOSPHOGLYCERATE/3-PHOSPHOGLYCERATE	A428_34	SELECTED	S4	poor	fed	Two	304708	0.436374	no
2-PHOSPHOGLYCERATE/3-PHOSPHOGLYCERATE	A429_35	SELECTED	S5	poor	fed	Two	518643	0.895453	no
2-PHOSPHOGLYCERATE/3-PHOSPHOGLYCERATE	A430_36	SELECTED	S6	poor	fed	Two	316308	0.468624	no
2-PHOSPHOGLYCERATE/3-PHOSPHOGLYCERATE	AS201_13	CONTROL	C1	standard	starved	Two	145666	-0.200665	no
2-PHOSPHOGLYCERATE/3-PHOSPHOGLYCERATE	AS202_14	CONTROL	C2	standard	starved	Two	148212	-0.185711	no
2-PHOSPHOGLYCERATE/3-PHOSPHOGLYCERATE	AS203_15	CONTROL	C3	standard	starved	Two	88809.7	-0.627775	no
2-PHOSPHOGLYCERATE/3-PHOSPHOGLYCERATE	AS204_16	CONTROL	C4	standard	starved	Two	111282	-0.433067	no
2-PHOSPHOGLYCERATE/3-PHOSPHOGLYCERATE	AS205_17	CONTROL	C5	standard	starved	Two	116505	-0.393484	no
2-PHOSPHOGLYCERATE/3-PHOSPHOGLYCERATE	AS206_18	CONTROL	C6	standard	starved	Two	52662.6	-1.07885	no
2-PHOSPHOGLYCERATE/3-PHOSPHOGLYCERATE	AS225_19	SELECTED	S1	standard	starved	Two	239594	0.228862	no
2-PHOSPHOGLYCERATE/3-PHOSPHOGLYCERATE	AS226_20	SELECTED	S2	standard	starved	Two	66061.8	-0.883187	no
2-PHOSPHOGLYCERATE/3-PHOSPHOGLYCERATE	AS227_21	SELECTED	S3	standard	starved	Two	188002	0.0195542	no
2-PHOSPHOGLYCERATE/3-PHOSPHOGLYCERATE	AS228_22	SELECTED	S4	standard	starved	Two	383199	0.63421	no
2-PHOSPHOGLYCERATE/3-PHOSPHOGLYCERATE	AS229_23	SELECTED	S5	standard	starved	Two	141940	-0.223034	no
2-PHOSPHOGLYCERATE/3-PHOSPHOGLYCERATE	AS230_24	SELECTED	S6	standard	starved	Two	178530	-0.0250647	no
2-PHOSPHOGLYCERATE/3-PHOSPHOGLYCERATE	AS401_37	CONTROL	C1	poor	starved	Two	80807.7	-0.709277	no
2-PHOSPHOGLYCERATE/3-PHOSPHOGLYCERATE	AS402_38	CONTROL	C2	poor	starved	Two	171173	-0.061389	no
2-PHOSPHOGLYCERATE/3-PHOSPHOGLYCERATE	AS403_39	CONTROL	C3	poor	starved	Two	134787	-0.267666	no
2-PHOSPHOGLYCERATE/3-PHOSPHOGLYCERATE	AS404_40	CONTROL	C4	poor	starved	Two	120884	-0.361637	no
2-PHOSPHOGLYCERATE/3-PHOSPHOGLYCERATE	AS405_41	CONTROL	C5	poor	starved	Two	177835	-0.0284321	no
2-PHOSPHOGLYCERATE/3-PHOSPHOGLYCERATE	AS406_42	CONTROL	C6	poor	starved	Two	136698	-0.255515	no
2-PHOSPHOGLYCERATE/3-PHOSPHOGLYCERATE	AS425_43	SELECTED	S1	poor	starved	Two	162753	-0.104927	no
2-PHOSPHOGLYCERATE/3-PHOSPHOGLYCERATE	AS426_44	SELECTED	S2	poor	starved	Two	156592	-0.138239	no
2-PHOSPHOGLYCERATE/3-PHOSPHOGLYCERATE	AS427_45	SELECTED	S3	poor	starved	Two	158419	-0.128228	no
2-PHOSPHOGLYCERATE/3-PHOSPHOGLYCERATE	AS428_46	SELECTED	S4	poor	starved	Two	91141.8	-0.605401	no
2-PHOSPHOGLYCERATE/3-PHOSPHOGLYCERATE	AS429_47	SELECTED	S5	poor	starved	Two	31922.8	-1.51094	no
2-PHOSPHOGLYCERATE/3-PHOSPHOGLYCERATE	AS430_48	SELECTED	S6	poor	starved	Two	220511	0.157224	no
2-PHOSPHOGLYCERATE/3-PHOSPHOGLYCERATE	A101_1	CONTROL	C1	standard	fed	One	370601	-0.124788	no
2-PHOSPHOGLYCERATE/3-PHOSPHOGLYCERATE	A102_2	CONTROL	C2	standard	fed	One	202664	-0.608316	no
2-PHOSPHOGLYCERATE/3-PHOSPHOGLYCERATE	A103_3	CONTROL	C3	standard	fed	One	290383	-0.320196	no
2-PHOSPHOGLYCERATE/3-PHOSPHOGLYCERATE	A104_4	CONTROL	C4	standard	fed	One	302684	-0.286959	no
2-PHOSPHOGLYCERATE/3-PHOSPHOGLYCERATE	A105_5	CONTROL	C5	standard	fed	One	451552	0.0334831	no
2-PHOSPHOGLYCERATE/3-PHOSPHOGLYCERATE	A106_6	CONTROL	C6	standard	fed	One	517827	0.143195	no
2-PHOSPHOGLYCERATE/3-PHOSPHOGLYCERATE	A125_7	SELECTED	S1	standard	fed	One	313809	-0.258045	no
2-PHOSPHOGLYCERATE/3-PHOSPHOGLYCERATE	A126_8	SELECTED	S2	standard	fed	One	866877	0.555968	no
2-PHOSPHOGLYCERATE/3-PHOSPHOGLYCERATE	A127_9	SELECTED	S3	standard	fed	One	564037	0.211672	no
2-PHOSPHOGLYCERATE/3-PHOSPHOGLYCERATE	A128_10	SELECTED	S4	standard	fed	One	561301	0.207777	no
2-PHOSPHOGLYCERATE/3-PHOSPHOGLYCERATE	A129_11	SELECTED	S5	standard	fed	One	442388	0.0170579	no
2-PHOSPHOGLYCERATE/3-PHOSPHOGLYCERATE	A130_12	SELECTED	S6	standard	fed	One	295538	-0.306099	no
2-PHOSPHOGLYCERATE/3-PHOSPHOGLYCERATE	A301_25	CONTROL	C1	poor	fed	One	551175	0.193193	no
2-PHOSPHOGLYCERATE/3-PHOSPHOGLYCERATE	A302_26	CONTROL	C2	poor	fed	One	1.55737e+06	1.0253	no
2-PHOSPHOGLYCERATE/3-PHOSPHOGLYCERATE	A303_27	CONTROL	C3	poor	fed	One	803529	0.495177	no
2-PHOSPHOGLYCERATE/3-PHOSPHOGLYCERATE	A304_28	CONTROL	C4	poor	fed	One	666159	0.344983	no
2-PHOSPHOGLYCERATE/3-PHOSPHOGLYCERATE	A305_29	CONTROL	C5	poor	fed	One	992181	0.664124	no
2-PHOSPHOGLYCERATE/3-PHOSPHOGLYCERATE	A306_30	CONTROL	C6	poor	fed	One	786070	0.477579	no
2-PHOSPHOGLYCERATE/3-PHOSPHOGLYCERATE	A325_31	SELECTED	S1	poor	fed	One	817080	0.508575	no
2-PHOSPHOGLYCERATE/3-PHOSPHOGLYCERATE	A326_32	SELECTED	S2	poor	fed	One	652859	0.328826	no
2-PHOSPHOGLYCERATE/3-PHOSPHOGLYCERATE	A327_33	SELECTED	S3	poor	fed	One	1.06598e+06	0.721602	no
2-PHOSPHOGLYCERATE/3-PHOSPHOGLYCERATE	A328_34	SELECTED	S4	poor	fed	One	847477	0.537837	no
2-PHOSPHOGLYCERATE/3-PHOSPHOGLYCERATE	A329_35	SELECTED	S5	poor	fed	One	1.16111e+06	0.790077	no
2-PHOSPHOGLYCERATE/3-PHOSPHOGLYCERATE	A330_36	SELECTED	S6	poor	fed	One	487978	0.0956326	no
2-PHOSPHOGLYCERATE/3-PHOSPHOGLYCERATE	AS101_13	CONTROL	C1	standard	starved	One	265602	-0.391656	no
2-PHOSPHOGLYCERATE/3-PHOSPHOGLYCERATE	AS102_14	CONTROL	C2	standard	starved	One	126413	-0.98643	no
2-PHOSPHOGLYCERATE/3-PHOSPHOGLYCERATE	AS103_15	CONTROL	C3	standard	starved	One	177752	-0.71339	no
2-PHOSPHOGLYCERATE/3-PHOSPHOGLYCERATE	AS104_16	CONTROL	C4	standard	starved	One	165912	-0.76861	no
2-PHOSPHOGLYCERATE/3-PHOSPHOGLYCERATE	AS105_17	CONTROL	C5	standard	starved	One	165370	-0.771233	no
2-PHOSPHOGLYCERATE/3-PHOSPHOGLYCERATE	AS106_18	CONTROL	C6	standard	starved	One	97621.5	-1.19348	no
2-PHOSPHOGLYCERATE/3-PHOSPHOGLYCERATE	AS125_19	SELECTED	S1	standard	starved	One	219532	-0.544267	no
2-PHOSPHOGLYCERATE/3-PHOSPHOGLYCERATE	AS126_20	SELECTED	S2	standard	starved	One	241130	-0.469095	no
2-PHOSPHOGLYCERATE/3-PHOSPHOGLYCERATE	AS127_21	SELECTED	S3	standard	starved	One	349867	-0.17091	no
2-PHOSPHOGLYCERATE/3-PHOSPHOGLYCERATE	AS128_22	SELECTED	S4	standard	starved	One	424623	-0.0157763	no
2-PHOSPHOGLYCERATE/3-PHOSPHOGLYCERATE	AS129_23	SELECTED	S5	standard	starved	One	124140	-1.00097	no
2-PHOSPHOGLYCERATE/3-PHOSPHOGLYCERATE	AS130_24	SELECTED	S6	standard	starved	One	198036	-0.62682	no
2-PHOSPHOGLYCERATE/3-PHOSPHOGLYCERATE	AS301_37	CONTROL	C1	poor	starved	One	237094	-0.482615	no
2-PHOSPHOGLYCERATE/3-PHOSPHOGLYCERATE	AS302_38	CONTROL	C2	poor	starved	One	805505	0.497146	no
2-PHOSPHOGLYCERATE/3-PHOSPHOGLYCERATE	AS303_39	CONTROL	C3	poor	starved	One	513424	0.136354	no
2-PHOSPHOGLYCERATE/3-PHOSPHOGLYCERATE	AS304_40	CONTROL	C4	poor	starved	One	699236	0.383804	no
2-PHOSPHOGLYCERATE/3-PHOSPHOGLYCERATE	AS305_41	CONTROL	C5	poor	starved	One	499993	0.115118	no
2-PHOSPHOGLYCERATE/3-PHOSPHOGLYCERATE	AS306_42	CONTROL	C6	poor	starved	One	615438	0.28154	no
2-PHOSPHOGLYCERATE/3-PHOSPHOGLYCERATE	AS325_43	SELECTED	S1	poor	starved	One	1.04681e+06	0.707064	no
2-PHOSPHOGLYCERATE/3-PHOSPHOGLYCERATE	AS326_44	SELECTED	S2	poor	starved	One	239956	-0.473003	no
2-PHOSPHOGLYCERATE/3-PHOSPHOGLYCERATE	AS327_45	SELECTED	S3	poor	starved	One	516907	0.14177	no
2-PHOSPHOGLYCERATE/3-PHOSPHOGLYCERATE	AS328_46	SELECTED	S4	poor	starved	One	673745	0.354054	no
2-PHOSPHOGLYCERATE/3-PHOSPHOGLYCERATE	AS329_47	SELECTED	S5	poor	starved	One	1.33237e+06	0.900299	no
2-PHOSPHOGLYCERATE/3-PHOSPHOGLYCERATE	AS330_48	SELECTED	S6	poor	starved	One	277499	-0.356552	no
4-GUANIDINOBUTANOATE	A201_1	CONTROL	C1	standard	fed	Two	208192	0.527646	no
4-GUANIDINOBUTANOATE	A202_2	CONTROL	C2	standard	fed	Two	69007.4	-0.486154	no
4-GUANIDINOBUTANOATE	A203_3	CONTROL	C3	standard	fed	Two	169918	0.341141	no
4-GUANIDINOBUTANOATE	A204_4	CONTROL	C4	standard	fed	Two	164099	0.309148	no
4-GUANIDINOBUTANOATE	A205_5	CONTROL	C5	standard	fed	Two	198189	0.48244	no
4-GUANIDINOBUTANOATE	A206_6	CONTROL	C6	standard	fed	Two	206731	0.521184	no
4-GUANIDINOBUTANOATE	A225_7	SELECTED	S1	standard	fed	Two	89377.1	-0.248688	no
4-GUANIDINOBUTANOATE	A226_8	SELECTED	S2	standard	fed	Two	103458	-0.114367	no
4-GUANIDINOBUTANOATE	A227_9	SELECTED	S3	standard	fed	Two	104591	-0.104369	no
4-GUANIDINOBUTANOATE	A228_10	SELECTED	S4	standard	fed	Two	106801	-0.0851769	no
4-GUANIDINOBUTANOATE	A229_11	SELECTED	S5	standard	fed	Two	97568.1	-0.168185	no
4-GUANIDINOBUTANOATE	A230_12	SELECTED	S6	standard	fed	Two	185457	0.421484	no
4-GUANIDINOBUTANOATE	A401_25	CONTROL	C1	poor	fed	Two	182973	0.409104	no
4-GUANIDINOBUTANOATE	A402_26	CONTROL	C2	poor	fed	Two	247139	0.685092	no
4-GUANIDINOBUTANOATE	A403_27	CONTROL	C3	poor	fed	Two	270448	0.767838	no
4-GUANIDINOBUTANOATE	A404_28	CONTROL	C4	poor	fed	Two	182676	0.407612	no
4-GUANIDINOBUTANOATE	A405_29	CONTROL	C5	poor	fed	Two	234867	0.638332	no
4-GUANIDINOBUTANOATE	A406_30	CONTROL	C6	poor	fed	Two	363257	1.0387	no
4-GUANIDINOBUTANOATE	A425_31	SELECTED	S1	poor	fed	Two	164869	0.313447	no
4-GUANIDINOBUTANOATE	A426_32	SELECTED	S2	poor	fed	Two	151707	0.237063	no
4-GUANIDINOBUTANOATE	A427_33	SELECTED	S3	poor	fed	Two	179315	0.390562	no
4-GUANIDINOBUTANOATE	A428_34	SELECTED	S4	poor	fed	Two	125733	0.064653	no
4-GUANIDINOBUTANOATE	A429_35	SELECTED	S5	poor	fed	Two	257198	0.721718	no
4-GUANIDINOBUTANOATE	A430_36	SELECTED	S6	poor	fed	Two	188028	0.434123	no
4-GUANIDINOBUTANOATE	AS201_13	CONTROL	C1	standard	starved	Two	104436	-0.105733	no
4-GUANIDINOBUTANOATE	AS202_14	CONTROL	C2	standard	starved	Two	43138.8	-0.917465	no
4-GUANIDINOBUTANOATE	AS203_15	CONTROL	C3	standard	starved	Two	89675.5	-0.245629	no
4-GUANIDINOBUTANOATE	AS204_16	CONTROL	C4	standard	starved	Two	102739	-0.120772	no
4-GUANIDINOBUTANOATE	AS205_17	CONTROL	C5	standard	starved	Two	94351	-0.198967	no
4-GUANIDINOBUTANOATE	AS206_18	CONTROL	C6	standard	starved	Two	70289.8	-0.469249	no
4-GUANIDINOBUTANOATE	AS225_19	SELECTED	S1	standard	starved	Two	44807.8	-0.882615	no
4-GUANIDINOBUTANOATE	AS226_20	SELECTED	S2	standard	starved	Two	52835.7	-0.73131	no
4-GUANIDINOBUTANOATE	AS227_21	SELECTED	S3	standard	starved	Two	77634.9	-0.378	no
4-GUANIDINOBUTANOATE	AS228_22	SELECTED	S4	standard	starved	Two	86655.5	-0.27708	no
4-GUANIDINOBUTANOATE	AS229_23	SELECTED	S5	standard	starved	Two	45549.8	-0.867536	no
4-GUANIDINOBUTANOATE	AS230_24	SELECTED	S6	standard	starved	Two	83151.2	-0.314978	no
4-GUANIDINOBUTANOATE	AS401_37	CONTROL	C1	poor	starved	Two	108750	-0.0685727	no
4-GUANIDINOBUTANOATE	AS402_38	CONTROL	C2	poor	starved	Two	41754.4	-0.947413	no
4-GUANIDINOBUTANOATE	AS403_39	CONTROL	C3	poor	starved	Two	111679	-0.0441728	no
4-GUANIDINOBUTANOATE	AS404_40	CONTROL	C4	poor	starved	Two	105128	-0.0996654	no
4-GUANIDINOBUTANOATE	AS405_41	CONTROL	C5	poor	starved	Two	123574	0.0487488	no
4-GUANIDINOBUTANOATE	AS406_42	CONTROL	C6	poor	starved	Two	83360.5	-0.312671	no
4-GUANIDINOBUTANOATE	AS425_43	SELECTED	S1	poor	starved	Two	61412.1	-0.59321	no
4-GUANIDINOBUTANOATE	AS426_44	SELECTED	S2	poor	starved	Two	99500.5	-0.150179	no
4-GUANIDINOBUTANOATE	AS427_45	SELECTED	S3	poor	starved	Two	103931	-0.110187	no
4-GUANIDINOBUTANOATE	AS428_46	SELECTED	S4	poor	starved	Two	134267	0.124942	no
4-GUANIDINOBUTANOATE	AS429_47	SELECTED	S5	poor	starved	Two	101889	-0.128401	no
4-GUANIDINOBUTANOATE	AS430_48	SELECTED	S6	poor	starved	Two	159972	0.285763	no
4-GUANIDINOBUTANOATE	A101_1	CONTROL	C1	standard	fed	One	150831	0.353321	no
4-GUANIDINOBUTANOATE	A102_2	CONTROL	C2	standard	fed	One	62377.1	-0.403358	no
4-GUANIDINOBUTANOATE	A103_3	CONTROL	C3	standard	fed	One	174670	0.479077	no
4-GUANIDINOBUTANOATE	A104_4	CONTROL	C4	standard	fed	One	123909	0.184828	no
4-GUANIDINOBUTANOATE	A105_5	CONTROL	C5	standard	fed	One	264073	0.833287	no
4-GUANIDINOBUTANOATE	A106_6	CONTROL	C6	standard	fed	One	306883	0.962041	no
4-GUANIDINOBUTANOATE	A125_7	SELECTED	S1	standard	fed	One	55425.5	-0.504617	no
4-GUANIDINOBUTANOATE	A126_8	SELECTED	S2	standard	fed	One	98180	-0.0146281	no
4-GUANIDINOBUTANOATE	A127_9	SELECTED	S3	standard	fed	One	96681.2	-0.0278115	no
4-GUANIDINOBUTANOATE	A128_10	SELECTED	S4	standard	fed	One	92893.4	-0.0620617	no
4-GUANIDINOBUTANOATE	A129_11	SELECTED	S5	standard	fed	One	129562	0.22306	no
4-GUANIDINOBUTANOATE	A130_12	SELECTED	S6	standard	fed	One	210151	0.637557	no
4-GUANIDINOBUTANOATE	A301_25	CONTROL	C1	poor	fed	One	203576	0.610316	no
4-GUANIDINOBUTANOATE	A302_26	CONTROL	C2	poor	fed	One	83133	-0.157196	no
4-GUANIDINOBUTANOATE	A303_27	CONTROL	C3	poor	fed	One	255293	0.804309	no
4-GUANIDINOBUTANOATE	A304_28	CONTROL	C4	poor	fed	One	149506	0.345763	no
4-GUANIDINOBUTANOATE	A305_29	CONTROL	C5	poor	fed	One	295451	0.929509	no
4-GUANIDINOBUTANOATE	A306_30	CONTROL	C6	poor	fed	One	236779	0.739792	no
4-GUANIDINOBUTANOATE	A325_31	SELECTED	S1	poor	fed	One	126088	0.199771	no
4-GUANIDINOBUTANOATE	A326_32	SELECTED	S2	poor	fed	One	155524	0.379578	no
4-GUANIDINOBUTANOATE	A327_33	SELECTED	S3	poor	fed	One	171953	0.46564	no
4-GUANIDINOBUTANOATE	A328_34	SELECTED	S4	poor	fed	One	181659	0.512696	no
4-GUANIDINOBUTANOATE	A329_35	SELECTED	S5	poor	fed	One	136712	0.269099	no
4-GUANIDINOBUTANOATE	A330_36	SELECTED	S6	poor	fed	One	130234	0.227494	no
4-GUANIDINOBUTANOATE	AS101_13	CONTROL	C1	standard	starved	One	97566	-0.0200041	no
4-GUANIDINOBUTANOATE	AS102_14	CONTROL	C2	standard	starved	One	35825.3	-0.878591	no
4-GUANIDINOBUTANOATE	AS103_15	CONTROL	C3	standard	starved	One	72652	-0.272683	no
4-GUANIDINOBUTANOATE	AS104_16	CONTROL	C4	standard	starved	One	57007.7	-0.480497	no
4-GUANIDINOBUTANOATE	AS105_17	CONTROL	C5	standard	starved	One	154300	0.37281	no
4-GUANIDINOBUTANOATE	AS106_18	CONTROL	C6	standard	starved	One	88676.4	-0.101876	no
4-GUANIDINOBUTANOATE	AS125_19	SELECTED	S1	standard	starved	One	35146.9	-0.894974	no
4-GUANIDINOBUTANOATE	AS126_20	SELECTED	S2	standard	starved	One	33409.3	-0.938427	no
4-GUANIDINOBUTANOATE	AS127_21	SELECTED	S3	standard	starved	One	49940	-0.593929	no
4-GUANIDINOBUTANOATE	AS128_22	SELECTED	S4	standard	starved	One	50962.4	-0.576563	no
4-GUANIDINOBUTANOATE	AS129_23	SELECTED	S5	standard	starved	One	42124.5	-0.739781	no
4-GUANIDINOBUTANOATE	AS130_24	SELECTED	S6	standard	starved	One	74400.7	-0.252301	no
4-GUANIDINOBUTANOATE	AS301_37	CONTROL	C1	poor	starved	One	72017.5	-0.280201	no
4-GUANIDINOBUTANOATE	AS302_38	CONTROL	C2	poor	starved	One	34332	-0.91508	no
4-GUANIDINOBUTANOATE	AS303_39	CONTROL	C3	poor	starved	One	64560.2	-0.373879	no
4-GUANIDINOBUTANOATE	AS304_40	CONTROL	C4	poor	starved	One	87528.2	-0.113045	no
4-GUANIDINOBUTANOATE	AS305_41	CONTROL	C5	poor	starved	One	112190	0.0996865	no
4-GUANIDINOBUTANOATE	AS306_42	CONTROL	C6	poor	starved	One	107477	0.0629049	no
4-GUANIDINOBUTANOATE	AS325_43	SELECTED	S1	poor	starved	One	75964.5	-0.234475	no
4-GUANIDINOBUTANOATE	AS326_44	SELECTED	S2	poor	starved	One	102099	0.0189155	no
4-GUANIDINOBUTANOATE	AS327_45	SELECTED	S3	poor	starved	One	96557.7	-0.0289073	no
4-GUANIDINOBUTANOATE	AS328_46	SELECTED	S4	poor	starved	One	49720.8	-0.5977	no
4-GUANIDINOBUTANOATE	AS329_47	SELECTED	S5	poor	starved	One	110557	0.0871218	no
4-GUANIDINOBUTANOATE	AS330_48	SELECTED	S6	poor	starved	One	67478.6	-0.335989	no
4-HYDROXY-PROLINE	A201_1	CONTROL	C1	standard	fed	Two	14898.4	-0.238514	no
4-HYDROXY-PROLINE	A202_2	CONTROL	C2	standard	fed	Two	54791.3	0.931238	no
4-HYDROXY-PROLINE	A203_3	CONTROL	C3	standard	fed	Two	19612.9	0.00843852	no
4-HYDROXY-PROLINE	A204_4	CONTROL	C4	standard	fed	Two	16526.9	-0.145335	no
4-HYDROXY-PROLINE	A205_5	CONTROL	C5	standard	fed	Two	8250.09	-0.769402	no
4-HYDROXY-PROLINE	A206_6	CONTROL	C6	standard	fed	Two	8337.02	-0.759988	no
4-HYDROXY-PROLINE	A225_7	SELECTED	S1	standard	fed	Two	21800.5	0.103424	no
4-HYDROXY-PROLINE	A226_8	SELECTED	S2	standard	fed	Two	40657.6	0.663254	no
4-HYDROXY-PROLINE	A227_9	SELECTED	S3	standard	fed	Two	11137.4	-0.499851	no
4-HYDROXY-PROLINE	A228_10	SELECTED	S4	standard	fed	Two	12651.9	-0.385329	no
4-HYDROXY-PROLINE	A229_11	SELECTED	S5	standard	fed	Two	20522.5	0.0491626	no
4-HYDROXY-PROLINE	A230_12	SELECTED	S6	standard	fed	Two	30616.8	0.40848	no
4-HYDROXY-PROLINE	A401_25	CONTROL	C1	poor	fed	Two	7510.97	-0.853711	no
4-HYDROXY-PROLINE	A402_26	CONTROL	C2	poor	fed	Two	66537.2	1.1057	no
4-HYDROXY-PROLINE	A403_27	CONTROL	C3	poor	fed	Two	22372.5	0.126688	no
4-HYDROXY-PROLINE	A404_28	CONTROL	C4	poor	fed	Two	8660.02	-0.725845	no
4-HYDROXY-PROLINE	A405_29	CONTROL	C5	poor	fed	Two	16828.7	-0.129082	no
4-HYDROXY-PROLINE	A406_30	CONTROL	C6	poor	fed	Two	26387.7	0.274956	no
4-HYDROXY-PROLINE	A425_31	SELECTED	S1	poor	fed	Two	39772.9	0.643492	no
4-HYDROXY-PROLINE	A426_32	SELECTED	S2	poor	fed	Two	17411.4	-0.098507	no
4-HYDROXY-PROLINE	A427_33	SELECTED	S3	poor	fed	Two	28874.5	0.355851	no
4-HYDROXY-PROLINE	A428_34	SELECTED	S4	poor	fed	Two	20762.5	0.0596054	no
4-HYDROXY-PROLINE	A429_35	SELECTED	S5	poor	fed	Two	39116.9	0.628553	no
4-HYDROXY-PROLINE	A430_36	SELECTED	S6	poor	fed	Two	14552.6	-0.259612	no
4-HYDROXY-PROLINE	AS201_13	CONTROL	C1	standard	starved	Two	23587.3	0.174182	no
4-HYDROXY-PROLINE	AS202_14	CONTROL	C2	standard	starved	Two	16983.8	-0.120842	no
4-HYDROXY-PROLINE	AS203_15	CONTROL	C3	standard	starved	Two	18510.2	-0.0435357	no
4-HYDROXY-PROLINE	AS204_16	CONTROL	C4	standard	starved	Two	15164.3	-0.222628	no
4-HYDROXY-PROLINE	AS205_17	CONTROL	C5	standard	starved	Two	8455.42	-0.74732	no
4-HYDROXY-PROLINE	AS206_18	CONTROL	C6	standard	starved	Two	16751.4	-0.13322	no
4-HYDROXY-PROLINE	AS225_19	SELECTED	S1	standard	starved	Two	13543.6	-0.324153	no
4-HYDROXY-PROLINE	AS226_20	SELECTED	S2	standard	starved	Two	42892.1	0.711311	no
4-HYDROXY-PROLINE	AS227_21	SELECTED	S3	standard	starved	Two	10453.9	-0.556746	no
4-HYDROXY-PROLINE	AS228_22	SELECTED	S4	standard	starved	Two	15828	-0.184151	no
4-HYDROXY-PROLINE	AS229_23	SELECTED	S5	standard	starved	Two	14420.2	-0.267823	no
4-HYDROXY-PROLINE	AS230_24	SELECTED	S6	standard	starved	Two	17032.3	-0.118281	no
4-HYDROXY-PROLINE	AS401_37	CONTROL	C1	poor	starved	Two	16393.5	-0.152617	no
4-HYDROXY-PROLINE	AS402_38	CONTROL	C2	poor	starved	Two	65776.9	1.09538	no
4-HYDROXY-PROLINE	AS403_39	CONTROL	C3	poor	starved	Two	21383.8	0.0860887	no
4-HYDROXY-PROLINE	AS404_40	CONTROL	C4	poor	starved	Two	10269.6	-0.572718	no
4-HYDROXY-PROLINE	AS405_41	CONTROL	C5	poor	starved	Two	47673.5	0.806244	no
4-HYDROXY-PROLINE	AS406_42	CONTROL	C6	poor	starved	Two	16029.4	-0.172789	no
4-HYDROXY-PROLINE	AS425_43	SELECTED	S1	poor	starved	Two	17551	-0.0913344	no
4-HYDROXY-PROLINE	AS426_44	SELECTED	S2	poor	starved	Two	20187	0.0343564	no
4-HYDROXY-PROLINE	AS427_45	SELECTED	S3	poor	starved	Two	24817.8	0.219861	no
4-HYDROXY-PROLINE	AS428_46	SELECTED	S4	poor	starved	Two	13186	-0.348192	no
4-HYDROXY-PROLINE	AS429_47	SELECTED	S5	poor	starved	Two	21832.4	0.104737	no
4-HYDROXY-PROLINE	AS430_48	SELECTED	S6	poor	starved	Two	28071.5	0.330518	no
4-HYDROXY-PROLINE	A101_1	CONTROL	C1	standard	fed	One	17222.3	-0.279127	no
4-HYDROXY-PROLINE	A102_2	CONTROL	C2	standard	fed	One	50637.9	0.606544	no
4-HYDROXY-PROLINE	A103_3	CONTROL	C3	standard	fed	One	30623.1	0.193518	no
4-HYDROXY-PROLINE	A104_4	CONTROL	C4	standard	fed	One	17945.5	-0.245346	no
4-HYDROXY-PROLINE	A105_5	CONTROL	C5	standard	fed	One	35099	0.305548	no
4-HYDROXY-PROLINE	A106_6	CONTROL	C6	standard	fed	One	18693.1	-0.211829	no
4-HYDROXY-PROLINE	A125_7	SELECTED	S1	standard	fed	One	6958.25	-1.02337	no
4-HYDROXY-PROLINE	A126_8	SELECTED	S2	standard	fed	One	17355.8	-0.272786	no
4-HYDROXY-PROLINE	A127_9	SELECTED	S3	standard	fed	One	25615.8	0.0468971	no
4-HYDROXY-PROLINE	A128_10	SELECTED	S4	standard	fed	One	10324.1	-0.699364	no
4-HYDROXY-PROLINE	A129_11	SELECTED	S5	standard	fed	One	48064.8	0.563717	no
4-HYDROXY-PROLINE	A130_12	SELECTED	S6	standard	fed	One	26853.3	0.0856404	no
4-HYDROXY-PROLINE	A301_25	CONTROL	C1	poor	fed	One	19229.6	-0.188591	no
4-HYDROXY-PROLINE	A302_26	CONTROL	C2	poor	fed	One	65218.7	0.814347	no
4-HYDROXY-PROLINE	A303_27	CONTROL	C3	poor	fed	One	26756.6	0.0826784	no
4-HYDROXY-PROLINE	A304_28	CONTROL	C4	poor	fed	One	16306.1	-0.324021	no
4-HYDROXY-PROLINE	A305_29	CONTROL	C5	poor	fed	One	25443.6	0.0413557	no
4-HYDROXY-PROLINE	A306_30	CONTROL	C6	poor	fed	One	12885	-0.517392	no
4-HYDROXY-PROLINE	A325_31	SELECTED	S1	poor	fed	One	36950.8	0.347769	no
4-HYDROXY-PROLINE	A326_32	SELECTED	S2	poor	fed	One	29697.3	0.168311	no
4-HYDROXY-PROLINE	A327_33	SELECTED	S3	poor	fed	One	68807.1	0.858331	no
4-HYDROXY-PROLINE	A328_34	SELECTED	S4	poor	fed	One	18777.5	-0.20813	no
4-HYDROXY-PROLINE	A329_35	SELECTED	S5	poor	fed	One	34294.8	0.286513	no
4-HYDROXY-PROLINE	A330_36	SELECTED	S6	poor	fed	One	14898	-0.398185	no
4-HYDROXY-PROLINE	AS101_13	CONTROL	C1	standard	starved	One	27150.8	0.0946869	no
4-HYDROXY-PROLINE	AS102_14	CONTROL	C2	standard	starved	One	34699.1	0.296138	no
4-HYDROXY-PROLINE	AS103_15	CONTROL	C3	standard	starved	One	37122	0.351566	no
4-HYDROXY-PROLINE	AS104_16	CONTROL	C4	standard	starved	One	29502.3	0.1629	no
4-HYDROXY-PROLINE	AS105_17	CONTROL	C5	standard	starved	One	31958.8	0.228579	no
4-HYDROXY-PROLINE	AS106_18	CONTROL	C6	standard	starved	One	17252.8	-0.277673	no
4-HYDROXY-PROLINE	AS125_19	SELECTED	S1	standard	starved	One	6591.21	-1.06787	no
4-HYDROXY-PROLINE	AS126_20	SELECTED	S2	standard	starved	One	9213.33	-0.792838	no
4-HYDROXY-PROLINE	AS127_21	SELECTED	S3	standard	starved	One	8335.23	-0.87509	no
4-HYDROXY-PROLINE	AS128_22	SELECTED	S4	standard	starved	One	5881.7	-1.1614	no
4-HYDROXY-PROLINE	AS129_23	SELECTED	S5	standard	starved	One	72641.1	0.902861	no
4-HYDROXY-PROLINE	AS130_24	SELECTED	S6	standard	starved	One	40587	0.424849	no
4-HYDROXY-PROLINE	AS301_37	CONTROL	C1	poor	starved	One	16192.1	-0.32978	no
4-HYDROXY-PROLINE	AS302_38	CONTROL	C2	poor	starved	One	64977.4	0.811303	no
4-HYDROXY-PROLINE	AS303_39	CONTROL	C3	poor	starved	One	20563.8	-0.133503	no
4-HYDROXY-PROLINE	AS304_40	CONTROL	C4	poor	starved	One	24337	0.00484182	no
4-HYDROXY-PROLINE	AS305_41	CONTROL	C5	poor	starved	One	42699.5	0.466517	no
4-HYDROXY-PROLINE	AS306_42	CONTROL	C6	poor	starved	One	14801.9	-0.403501	no
4-HYDROXY-PROLINE	AS325_43	SELECTED	S1	poor	starved	One	35010	0.303461	no
4-HYDROXY-PROLINE	AS326_44	SELECTED	S2	poor	starved	One	32906.6	0.25258	no
4-HYDROXY-PROLINE	AS327_45	SELECTED	S3	poor	starved	One	72186.6	0.897706	no
4-HYDROXY-PROLINE	AS328_46	SELECTED	S4	poor	starved	One	15760.9	-0.351947	no
4-HYDROXY-PROLINE	AS329_47	SELECTED	S5	poor	starved	One	56465.3	0.695995	no
4-HYDROXY-PROLINE	AS330_48	SELECTED	S6	poor	starved	One	12636.3	-0.533402	no
4-IMIDAZOLEACETATE	A201_1	CONTROL	C1	standard	fed	Two	18768.1	-0.146814	no
4-IMIDAZOLEACETATE	A202_2	CONTROL	C2	standard	fed	Two	20002.1	-0.0597937	no
4-IMIDAZOLEACETATE	A203_3	CONTROL	C3	standard	fed	Two	18651.9	-0.155308	no
4-IMIDAZOLEACETATE	A204_4	CONTROL	C4	standard	fed	Two	19716	-0.0794802	no
4-IMIDAZOLEACETATE	A205_5	CONTROL	C5	standard	fed	Two	16543.4	-0.319247	no
4-IMIDAZOLEACETATE	A206_6	CONTROL	C6	standard	fed	Two	19227.6	-0.113758	no
4-IMIDAZOLEACETATE	A225_7	SELECTED	S1	standard	fed	Two	15839.5	-0.378669	no
4-IMIDAZOLEACETATE	A226_8	SELECTED	S2	standard	fed	Two	18963.3	-0.132677	no
4-IMIDAZOLEACETATE	A227_9	SELECTED	S3	standard	fed	Two	15632.1	-0.396681	no
4-IMIDAZOLEACETATE	A228_10	SELECTED	S4	standard	fed	Two	17317.7	-0.256734	no
4-IMIDAZOLEACETATE	A229_11	SELECTED	S5	standard	fed	Two	17781.2	-0.220641	no
4-IMIDAZOLEACETATE	A230_12	SELECTED	S6	standard	fed	Two	21101.1	0.013305	no
4-IMIDAZOLEACETATE	A401_25	CONTROL	C1	poor	fed	Two	15543.9	-0.404419	no
4-IMIDAZOLEACETATE	A402_26	CONTROL	C2	poor	fed	Two	25454.4	0.269638	no
4-IMIDAZOLEACETATE	A403_27	CONTROL	C3	poor	fed	Two	17686.3	-0.227954	no
4-IMIDAZOLEACETATE	A404_28	CONTROL	C4	poor	fed	Two	17863	-0.214366	no
4-IMIDAZOLEACETATE	A405_29	CONTROL	C5	poor	fed	Two	13669	-0.580077	no
4-IMIDAZOLEACETATE	A406_30	CONTROL	C6	poor	fed	Two	28583.4	0.428085	no
4-IMIDAZOLEACETATE	A425_31	SELECTED	S1	poor	fed	Two	18964.8	-0.132566	no
4-IMIDAZOLEACETATE	A426_32	SELECTED	S2	poor	fed	Two	17145.4	-0.270397	no
4-IMIDAZOLEACETATE	A427_33	SELECTED	S3	poor	fed	Two	16354.7	-0.334924	no
4-IMIDAZOLEACETATE	A428_34	SELECTED	S4	poor	fed	Two	26039.5	0.300696	no
4-IMIDAZOLEACETATE	A429_35	SELECTED	S5	poor	fed	Two	29867.1	0.488123	no
4-IMIDAZOLEACETATE	A430_36	SELECTED	S6	poor	fed	Two	19719.6	-0.0792279	no
4-IMIDAZOLEACETATE	AS201_13	CONTROL	C1	standard	starved	Two	20083.4	-0.0542475	no
4-IMIDAZOLEACETATE	AS202_14	CONTROL	C2	standard	starved	Two	20791.2	-0.00691334	no
4-IMIDAZOLEACETATE	AS203_15	CONTROL	C3	standard	starved	Two	23117.7	0.138045	no
4-IMIDAZOLEACETATE	AS204_16	CONTROL	C4	standard	starved	Two	17111.1	-0.273134	no
4-IMIDAZOLEACETATE	AS205_17	CONTROL	C5	standard	starved	Two	15171.6	-0.437546	no
4-IMIDAZOLEACETATE	AS206_18	CONTROL	C6	standard	starved	Two	22252.8	0.0859347	no
4-IMIDAZOLEACETATE	AS225_19	SELECTED	S1	standard	starved	Two	25118.5	0.251485	no
4-IMIDAZOLEACETATE	AS226_20	SELECTED	S2	standard	starved	Two	17948.7	-0.207826	no
4-IMIDAZOLEACETATE	AS227_21	SELECTED	S3	standard	starved	Two	17576.5	-0.236466	no
4-IMIDAZOLEACETATE	AS228_22	SELECTED	S4	standard	starved	Two	25192.3	0.255496	no
4-IMIDAZOLEACETATE	AS229_23	SELECTED	S5	standard	starved	Two	24705.5	0.22883	no
4-IMIDAZOLEACETATE	AS230_24	SELECTED	S6	standard	starved	Two	22159.3	0.0801777	no
4-IMIDAZOLEACETATE	AS401_37	CONTROL	C1	poor	starved	Two	22793.4	0.118736	no
4-IMIDAZOLEACETATE	AS402_38	CONTROL	C2	poor	starved	Two	23942.2	0.185937	no
4-IMIDAZOLEACETATE	AS403_39	CONTROL	C3	poor	starved	Two	23762.2	0.175623	no
4-IMIDAZOLEACETATE	AS404_40	CONTROL	C4	poor	starved	Two	27754.9	0.387884	no
4-IMIDAZOLEACETATE	AS405_41	CONTROL	C5	poor	starved	Two	19739.6	-0.0778445	no
4-IMIDAZOLEACETATE	AS406_42	CONTROL	C6	poor	starved	Two	18878.4	-0.138807	no
4-IMIDAZOLEACETATE	AS425_43	SELECTED	S1	poor	starved	Two	38083.8	0.820259	no
4-IMIDAZOLEACETATE	AS426_44	SELECTED	S2	poor	starved	Two	19925.7	-0.0650214	no
4-IMIDAZOLEACETATE	AS427_45	SELECTED	S3	poor	starved	Two	21969.9	0.0684469	no
4-IMIDAZOLEACETATE	AS428_46	SELECTED	S4	poor	starved	Two	24533.4	0.219275	no
4-IMIDAZOLEACETATE	AS429_47	SELECTED	S5	poor	starved	Two	31069.3	0.542052	no
4-IMIDAZOLEACETATE	AS430_48	SELECTED	S6	poor	starved	Two	41678.1	0.943511	no
4-IMIDAZOLEACETATE	A101_1	CONTROL	C1	standard	fed	One	27483	-0.240688	no
4-IMIDAZOLEACETATE	A102_2	CONTROL	C2	standard	fed	One	26151	-0.296217	no
4-IMIDAZOLEACETATE	A103_3	CONTROL	C3	standard	fed	One	28447.2	-0.202144	no
4-IMIDAZOLEACETATE	A104_4	CONTROL	C4	standard	fed	One	25787.7	-0.311856	no
4-IMIDAZOLEACETATE	A105_5	CONTROL	C5	standard	fed	One	28944.4	-0.182775	no
4-IMIDAZOLEACETATE	A106_6	CONTROL	C6	standard	fed	One	33258.4	-0.0274822	no
4-IMIDAZOLEACETATE	A125_7	SELECTED	S1	standard	fed	One	18840.7	-0.662698	no
4-IMIDAZOLEACETATE	A126_8	SELECTED	S2	standard	fed	One	22959.1	-0.441721	no
4-IMIDAZOLEACETATE	A127_9	SELECTED	S3	standard	fed	One	22247.7	-0.476903	no
4-IMIDAZOLEACETATE	A128_10	SELECTED	S4	standard	fed	One	22228.8	-0.477856	no
4-IMIDAZOLEACETATE	A129_11	SELECTED	S5	standard	fed	One	26406.7	-0.28534	no
4-IMIDAZOLEACETATE	A130_12	SELECTED	S6	standard	fed	One	32476.8	-0.0540647	no
4-IMIDAZOLEACETATE	A301_25	CONTROL	C1	poor	fed	One	30355.1	-0.129584	no
4-IMIDAZOLEACETATE	A302_26	CONTROL	C2	poor	fed	One	35310.7	0.0394468	no
4-IMIDAZOLEACETATE	A303_27	CONTROL	C3	poor	fed	One	35929.3	0.05886	no
4-IMIDAZOLEACETATE	A304_28	CONTROL	C4	poor	fed	One	36108.4	0.0644173	no
4-IMIDAZOLEACETATE	A305_29	CONTROL	C5	poor	fed	One	38698.8	0.141858	no
4-IMIDAZOLEACETATE	A306_30	CONTROL	C6	poor	fed	One	38229.9	0.128233	no
4-IMIDAZOLEACETATE	A325_31	SELECTED	S1	poor	fed	One	40232.8	0.185313	no
4-IMIDAZOLEACETATE	A326_32	SELECTED	S2	poor	fed	One	32184.8	-0.0641616	no
4-IMIDAZOLEACETATE	A327_33	SELECTED	S3	poor	fed	One	32037.9	-0.0692731	no
4-IMIDAZOLEACETATE	A328_34	SELECTED	S4	poor	fed	One	32543.6	-0.0517686	no
4-IMIDAZOLEACETATE	A329_35	SELECTED	S5	poor	fed	One	32399.9	-0.0567147	no
4-IMIDAZOLEACETATE	A330_36	SELECTED	S6	poor	fed	One	27619.5	-0.23515	no
4-IMIDAZOLEACETATE	AS101_13	CONTROL	C1	standard	starved	One	114482	1.35421	yes
4-IMIDAZOLEACETATE	AS102_14	CONTROL	C2	standard	starved	One	26363.5	-0.28717	no
4-IMIDAZOLEACETATE	AS103_15	CONTROL	C3	standard	starved	One	27900.8	-0.223824	no
4-IMIDAZOLEACETATE	AS104_16	CONTROL	C4	standard	starved	One	30678.7	-0.117731	no
4-IMIDAZOLEACETATE	AS105_17	CONTROL	C5	standard	starved	One	76548.3	0.904306	no
4-IMIDAZOLEACETATE	AS106_18	CONTROL	C6	standard	starved	One	27921.9	-0.222977	no
4-IMIDAZOLEACETATE	AS125_19	SELECTED	S1	standard	starved	One	27458.5	-0.241682	no
4-IMIDAZOLEACETATE	AS126_20	SELECTED	S2	standard	starved	One	28668.5	-0.193484	no
4-IMIDAZOLEACETATE	AS127_21	SELECTED	S3	standard	starved	One	29427.8	-0.164263	no
4-IMIDAZOLEACETATE	AS128_22	SELECTED	S4	standard	starved	One	30561	-0.122026	no
4-IMIDAZOLEACETATE	AS129_23	SELECTED	S5	standard	starved	One	23373.2	-0.421741	no
4-IMIDAZOLEACETATE	AS130_24	SELECTED	S6	standard	starved	One	31151.5	-0.100636	no
4-IMIDAZOLEACETATE	AS301_37	CONTROL	C1	poor	starved	One	31030.7	-0.104978	no
4-IMIDAZOLEACETATE	AS302_38	CONTROL	C2	poor	starved	One	39118.1	0.153905	no
4-IMIDAZOLEACETATE	AS303_39	CONTROL	C3	poor	starved	One	39636.5	0.168623	no
4-IMIDAZOLEACETATE	AS304_40	CONTROL	C4	poor	starved	One	44961.8	0.309531	no
4-IMIDAZOLEACETATE	AS305_41	CONTROL	C5	poor	starved	One	43303.8	0.267534	no
4-IMIDAZOLEACETATE	AS306_42	CONTROL	C6	poor	starved	One	31414.7	-0.0912333	no
4-IMIDAZOLEACETATE	AS325_43	SELECTED	S1	poor	starved	One	55439.4	0.543678	no
4-IMIDAZOLEACETATE	AS326_44	SELECTED	S2	poor	starved	One	51894.8	0.469825	no
4-IMIDAZOLEACETATE	AS327_45	SELECTED	S3	poor	starved	One	86284.8	1.03814	no
4-IMIDAZOLEACETATE	AS328_46	SELECTED	S4	poor	starved	One	44570.2	0.299754	no
4-IMIDAZOLEACETATE	AS329_47	SELECTED	S5	poor	starved	One	56587.8	0.566595	no
4-IMIDAZOLEACETATE	AS330_48	SELECTED	S6	poor	starved	One	30179.2	-0.136081	no
ACETYLCARNITINE	A201_1	CONTROL	C1	standard	fed	Two	8.14144e+07	-0.0682105	no
ACETYLCARNITINE	A202_2	CONTROL	C2	standard	fed	Two	7.77816e+07	-0.166311	no
ACETYLCARNITINE	A203_3	CONTROL	C3	standard	fed	Two	7.93611e+07	-0.123106	no
ACETYLCARNITINE	A204_4	CONTROL	C4	standard	fed	Two	6.98058e+07	-0.398815	no
ACETYLCARNITINE	A205_5	CONTROL	C5	standard	fed	Two	8.85136e+07	0.111462	no
ACETYLCARNITINE	A206_6	CONTROL	C6	standard	fed	Two	9.55652e+07	0.276194	no
ACETYLCARNITINE	A225_7	SELECTED	S1	standard	fed	Two	8.5511e+07	0.0372927	no
ACETYLCARNITINE	A226_8	SELECTED	S2	standard	fed	Two	8.71413e+07	0.0778799	no
ACETYLCARNITINE	A227_9	SELECTED	S3	standard	fed	Two	8.84257e+07	0.109327	no
ACETYLCARNITINE	A228_10	SELECTED	S4	standard	fed	Two	9.69185e+07	0.306414	no
ACETYLCARNITINE	A229_11	SELECTED	S5	standard	fed	Two	8.66098e+07	0.064733	no
ACETYLCARNITINE	A230_12	SELECTED	S6	standard	fed	Two	8.90104e+07	0.12349	no
ACETYLCARNITINE	A401_25	CONTROL	C1	poor	fed	Two	8.53906e+07	0.0342646	no
ACETYLCARNITINE	A402_26	CONTROL	C2	poor	fed	Two	7.84505e+07	-0.147909	no
ACETYLCARNITINE	A403_27	CONTROL	C3	poor	fed	Two	7.67305e+07	-0.19555	no
ACETYLCARNITINE	A404_28	CONTROL	C4	poor	fed	Two	7.81971e+07	-0.15486	no
ACETYLCARNITINE	A405_29	CONTROL	C5	poor	fed	Two	6.4086e+07	-0.582543	no
ACETYLCARNITINE	A406_30	CONTROL	C6	poor	fed	Two	1.01729e+08	0.410515	no
ACETYLCARNITINE	A425_31	SELECTED	S1	poor	fed	Two	9.28225e+07	0.213612	no
ACETYLCARNITINE	A426_32	SELECTED	S2	poor	fed	Two	8.2904e+07	-0.0292453	no
ACETYLCARNITINE	A427_33	SELECTED	S3	poor	fed	Two	9.14747e+07	0.182178	no
ACETYLCARNITINE	A428_34	SELECTED	S4	poor	fed	Two	8.77693e+07	0.0933132	no
ACETYLCARNITINE	A429_35	SELECTED	S5	poor	fed	Two	8.67383e+07	0.0679192	no
ACETYLCARNITINE	A430_36	SELECTED	S6	poor	fed	Two	8.08906e+07	-0.0820818	no
ACETYLCARNITINE	AS201_13	CONTROL	C1	standard	starved	Two	7.92282e+07	-0.12671	no
ACETYLCARNITINE	AS202_14	CONTROL	C2	standard	starved	Two	8.30161e+07	-0.0263417	no
ACETYLCARNITINE	AS203_15	CONTROL	C3	standard	starved	Two	9.10854e+07	0.173014	no
ACETYLCARNITINE	AS204_16	CONTROL	C4	standard	starved	Two	7.50051e+07	-0.244427	no
ACETYLCARNITINE	AS205_17	CONTROL	C5	standard	starved	Two	8.53323e+07	0.0327974	no
ACETYLCARNITINE	AS206_18	CONTROL	C6	standard	starved	Two	8.60338e+07	0.0503922	no
ACETYLCARNITINE	AS225_19	SELECTED	S1	standard	starved	Two	8.12583e+07	-0.0723347	no
ACETYLCARNITINE	AS226_20	SELECTED	S2	standard	starved	Two	8.91982e+07	0.128019	no
ACETYLCARNITINE	AS227_21	SELECTED	S3	standard	starved	Two	9.5851e+07	0.28261	no
ACETYLCARNITINE	AS228_22	SELECTED	S4	standard	starved	Two	1.02178e+08	0.419992	no
ACETYLCARNITINE	AS229_23	SELECTED	S5	standard	starved	Two	8.62809e+07	0.0565567	no
ACETYLCARNITINE	AS230_24	SELECTED	S6	standard	starved	Two	8.69465e+07	0.0730707	no
ACETYLCARNITINE	AS401_37	CONTROL	C1	poor	starved	Two	8.01337e+07	-0.102285	no
ACETYLCARNITINE	AS402_38	CONTROL	C2	poor	starved	Two	7.78137e+07	-0.165424	no
ACETYLCARNITINE	AS403_39	CONTROL	C3	poor	starved	Two	8.09367e+07	-0.080858	no
ACETYLCARNITINE	AS404_40	CONTROL	C4	poor	starved	Two	8.18328e+07	-0.0571944	no
ACETYLCARNITINE	AS405_41	CONTROL	C5	poor	starved	Two	8.44324e+07	0.0100138	no
ACETYLCARNITINE	AS406_42	CONTROL	C6	poor	starved	Two	7.93367e+07	-0.123767	no
ACETYLCARNITINE	AS425_43	SELECTED	S1	poor	starved	Two	7.71679e+07	-0.183335	no
ACETYLCARNITINE	AS426_44	SELECTED	S2	poor	starved	Two	8.22127e+07	-0.0472401	no
ACETYLCARNITINE	AS427_45	SELECTED	S3	poor	starved	Two	9.64499e+07	0.295997	no
ACETYLCARNITINE	AS428_46	SELECTED	S4	poor	starved	Two	8.43798e+07	0.0086743	no
ACETYLCARNITINE	AS429_47	SELECTED	S5	poor	starved	Two	6.77144e+07	-0.464186	no
ACETYLCARNITINE	AS430_48	SELECTED	S6	poor	starved	Two	8.41575e+07	0.00300459	no
ACETYLCARNITINE	A101_1	CONTROL	C1	standard	fed	One	9.59982e+07	0.0695248	no
ACETYLCARNITINE	A102_2	CONTROL	C2	standard	fed	One	9.39142e+07	0.0215267	no
ACETYLCARNITINE	A103_3	CONTROL	C3	standard	fed	One	9.74041e+07	0.101321	no
ACETYLCARNITINE	A104_4	CONTROL	C4	standard	fed	One	9.60077e+07	0.0697412	no
ACETYLCARNITINE	A105_5	CONTROL	C5	standard	fed	One	1.04747e+08	0.260267	no
ACETYLCARNITINE	A106_6	CONTROL	C6	standard	fed	One	1.10185e+08	0.370943	no
ACETYLCARNITINE	A125_7	SELECTED	S1	standard	fed	One	8.84373e+07	-0.109879	no
ACETYLCARNITINE	A126_8	SELECTED	S2	standard	fed	One	1.04802e+08	0.261421	no
ACETYLCARNITINE	A127_9	SELECTED	S3	standard	fed	One	1.14924e+08	0.463045	no
ACETYLCARNITINE	A128_10	SELECTED	S4	standard	fed	One	8.98414e+07	-0.0754318	no
ACETYLCARNITINE	A129_11	SELECTED	S5	standard	fed	One	9.25689e+07	-0.0100254	no
ACETYLCARNITINE	A130_12	SELECTED	S6	standard	fed	One	9.15916e+07	-0.0332383	no
ACETYLCARNITINE	A301_25	CONTROL	C1	poor	fed	One	1.07371e+08	0.314377	no
ACETYLCARNITINE	A302_26	CONTROL	C2	poor	fed	One	9.57351e+07	0.0635229	no
ACETYLCARNITINE	A303_27	CONTROL	C3	poor	fed	One	7.65757e+07	-0.424827	no
ACETYLCARNITINE	A304_28	CONTROL	C4	poor	fed	One	8.91948e+07	-0.0912284	no
ACETYLCARNITINE	A305_29	CONTROL	C5	poor	fed	One	9.70091e+07	0.0924334	no
ACETYLCARNITINE	A306_30	CONTROL	C6	poor	fed	One	1.02729e+08	0.217732	no
ACETYLCARNITINE	A325_31	SELECTED	S1	poor	fed	One	9.61143e+07	0.0721685	no
ACETYLCARNITINE	A326_32	SELECTED	S2	poor	fed	One	9.84056e+07	0.123691	no
ACETYLCARNITINE	A327_33	SELECTED	S3	poor	fed	One	9.25659e+07	-0.0100978	no
ACETYLCARNITINE	A328_34	SELECTED	S4	poor	fed	One	9.3755e+07	0.0178175	no
ACETYLCARNITINE	A329_35	SELECTED	S5	poor	fed	One	9.06899e+07	-0.0548741	no
ACETYLCARNITINE	A330_36	SELECTED	S6	poor	fed	One	8.91877e+07	-0.0914019	no
ACETYLCARNITINE	AS101_13	CONTROL	C1	standard	starved	One	9.94173e+07	0.146061	no
ACETYLCARNITINE	AS102_14	CONTROL	C2	standard	starved	One	8.88959e+07	-0.0985692	no
ACETYLCARNITINE	AS103_15	CONTROL	C3	standard	starved	One	8.86205e+07	-0.105355	no
ACETYLCARNITINE	AS104_16	CONTROL	C4	standard	starved	One	9.10428e+07	-0.0463811	no
ACETYLCARNITINE	AS105_17	CONTROL	C5	standard	starved	One	9.55731e+07	0.0598202	no
ACETYLCARNITINE	AS106_18	CONTROL	C6	standard	starved	One	8.63226e+07	-0.162808	no
ACETYLCARNITINE	AS125_19	SELECTED	S1	standard	starved	One	1.04013e+08	0.244897	no
ACETYLCARNITINE	AS126_20	SELECTED	S2	standard	starved	One	1.01893e+08	0.199843	no
ACETYLCARNITINE	AS127_21	SELECTED	S3	standard	starved	One	1.03232e+08	0.228394	no
ACETYLCARNITINE	AS128_22	SELECTED	S4	standard	starved	One	98275816	0.120806	no
ACETYLCARNITINE	AS129_23	SELECTED	S5	standard	starved	One	8.79378e+07	-0.122267	no
ACETYLCARNITINE	AS130_24	SELECTED	S6	standard	starved	One	8.01748e+07	-0.324383	no
ACETYLCARNITINE	AS301_37	CONTROL	C1	poor	starved	One	7.85917e+07	-0.367996	no
ACETYLCARNITINE	AS302_38	CONTROL	C2	poor	starved	One	9.50783e+07	0.0484687	no
ACETYLCARNITINE	AS303_39	CONTROL	C3	poor	starved	One	8.712e+07	-0.142699	no
ACETYLCARNITINE	AS304_40	CONTROL	C4	poor	starved	One	8.80086e+07	-0.120507	no
ACETYLCARNITINE	AS305_41	CONTROL	C5	poor	starved	One	9.27475e+07	-0.00581079	no
ACETYLCARNITINE	AS306_42	CONTROL	C6	poor	starved	One	8.56799e+07	-0.179151	no
ACETYLCARNITINE	AS325_43	SELECTED	S1	poor	starved	One	9.00294e+07	-0.0708588	no
ACETYLCARNITINE	AS326_44	SELECTED	S2	poor	starved	One	8.08934e+07	-0.30487	no
ACETYLCARNITINE	AS327_45	SELECTED	S3	poor	starved	One	9.61106e+07	0.0720852	no
ACETYLCARNITINE	AS328_46	SELECTED	S4	poor	starved	One	8.47321e+07	-0.203477	no
ACETYLCARNITINE	AS329_47	SELECTED	S5	poor	starved	One	9.30612e+07	0.00157271	no
ACETYLCARNITINE	AS330_48	SELECTED	S6	poor	starved	One	7.44857e+07	-0.485343	no
ADENINE	A201_1	CONTROL	C1	standard	fed	Two	118390	0.432799	no
ADENINE	A202_2	CONTROL	C2	standard	fed	Two	87745.1	0.0618439	no
ADENINE	A203_3	CONTROL	C3	standard	fed	Two	80299.4	-0.0479661	no
ADENINE	A204_4	CONTROL	C4	standard	fed	Two	134506	0.590841	no
ADENINE	A205_5	CONTROL	C5	standard	fed	Two	116186	0.409528	no
ADENINE	A206_6	CONTROL	C6	standard	fed	Two	99927.1	0.222838	no
ADENINE	A225_7	SELECTED	S1	standard	fed	Two	63842.9	-0.331971	no
ADENINE	A226_8	SELECTED	S2	standard	fed	Two	65369.9	-0.302701	no
ADENINE	A227_9	SELECTED	S3	standard	fed	Two	110942	0.352331	no
ADENINE	A228_10	SELECTED	S4	standard	fed	Two	118098	0.429738	no
ADENINE	A229_11	SELECTED	S5	standard	fed	Two	68180.8	-0.250564	no
ADENINE	A230_12	SELECTED	S6	standard	fed	Two	57655	-0.45822	no
ADENINE	A401_25	CONTROL	C1	poor	fed	Two	112169	0.365954	no
ADENINE	A402_26	CONTROL	C2	poor	fed	Two	165080	0.84449	no
ADENINE	A403_27	CONTROL	C3	poor	fed	Two	60871.3	-0.390996	no
ADENINE	A404_28	CONTROL	C4	poor	fed	Two	113757	0.383364	no
ADENINE	A405_29	CONTROL	C5	poor	fed	Two	79364.4	-0.0624712	no
ADENINE	A406_30	CONTROL	C6	poor	fed	Two	114098	0.38707	no
ADENINE	A425_31	SELECTED	S1	poor	fed	Two	118670	0.435722	no
ADENINE	A426_32	SELECTED	S2	poor	fed	Two	60817.1	-0.3921	no
ADENINE	A427_33	SELECTED	S3	poor	fed	Two	82517.7	-0.01422	no
ADENINE	A428_34	SELECTED	S4	poor	fed	Two	89017	0.0796665	no
ADENINE	A429_35	SELECTED	S5	poor	fed	Two	81100	-0.0356817	no
ADENINE	A430_36	SELECTED	S6	poor	fed	Two	71366.2	-0.194017	no
ADENINE	AS201_13	CONTROL	C1	standard	starved	Two	46824.3	-0.715894	no
ADENINE	AS202_14	CONTROL	C2	standard	starved	Two	96439.7	0.178848	no
ADENINE	AS203_15	CONTROL	C3	standard	starved	Two	77189.7	-0.0968772	no
ADENINE	AS204_16	CONTROL	C4	standard	starved	Two	86199.5	0.0398364	no
ADENINE	AS205_17	CONTROL	C5	standard	starved	Two	59639.1	-0.41632	no
ADENINE	AS206_18	CONTROL	C6	standard	starved	Two	67636.5	-0.260489	no
ADENINE	AS225_19	SELECTED	S1	standard	starved	Two	59269.7	-0.424015	no
ADENINE	AS226_20	SELECTED	S2	standard	starved	Two	60318.8	-0.402287	no
ADENINE	AS227_21	SELECTED	S3	standard	starved	Two	71401	-0.193414	no
ADENINE	AS228_22	SELECTED	S4	standard	starved	Two	71572	-0.190452	no
ADENINE	AS229_23	SELECTED	S5	standard	starved	Two	71645.4	-0.189182	no
ADENINE	AS230_24	SELECTED	S6	standard	starved	Two	57030.1	-0.471715	no
ADENINE	AS401_37	CONTROL	C1	poor	starved	Two	65489.5	-0.300436	no
ADENINE	AS402_38	CONTROL	C2	poor	starved	Two	120585	0.455543	no
ADENINE	AS403_39	CONTROL	C3	poor	starved	Two	83897	0.00630766	no
ADENINE	AS404_40	CONTROL	C4	poor	starved	Two	89282	0.0833475	no
ADENINE	AS405_41	CONTROL	C5	poor	starved	Two	79635.8	-0.058243	no
ADENINE	AS406_42	CONTROL	C6	poor	starved	Two	95990.7	0.173069	no
ADENINE	AS425_43	SELECTED	S1	poor	starved	Two	52707	-0.569338	no
ADENINE	AS426_44	SELECTED	S2	poor	starved	Two	70851.5	-0.202981	no
ADENINE	AS427_45	SELECTED	S3	poor	starved	Two	94455	0.153097	no
ADENINE	AS428_46	SELECTED	S4	poor	starved	Two	94953.3	0.159613	no
ADENINE	AS429_47	SELECTED	S5	poor	starved	Two	128857	0.537712	no
ADENINE	AS430_48	SELECTED	S6	poor	starved	Two	97233	0.188993	no
ADENINE	A101_1	CONTROL	C1	standard	fed	One	245702	-0.193086	no
ADENINE	A102_2	CONTROL	C2	standard	fed	One	285300	-0.0136225	no
ADENINE	A103_3	CONTROL	C3	standard	fed	One	268840	-0.0849954	no
ADENINE	A104_4	CONTROL	C4	standard	fed	One	539439	0.751422	no
ADENINE	A105_5	CONTROL	C5	standard	fed	One	494301	0.646469	no
ADENINE	A106_6	CONTROL	C6	standard	fed	One	230845	-0.267995	no
ADENINE	A125_7	SELECTED	S1	standard	fed	One	218016	-0.336668	no
ADENINE	A126_8	SELECTED	S2	standard	fed	One	160103	-0.707489	no
ADENINE	A127_9	SELECTED	S3	standard	fed	One	334665	0.178047	no
ADENINE	A128_10	SELECTED	S4	standard	fed	One	217112	-0.341662	no
ADENINE	A129_11	SELECTED	S5	standard	fed	One	241927	-0.211683	no
ADENINE	A130_12	SELECTED	S6	standard	fed	One	255465	-0.146284	no
ADENINE	A301_25	CONTROL	C1	poor	fed	One	294874	0.0260167	no
ADENINE	A302_26	CONTROL	C2	poor	fed	One	479621	0.610258	no
ADENINE	A303_27	CONTROL	C3	poor	fed	One	440370	0.507714	no
ADENINE	A304_28	CONTROL	C4	poor	fed	One	336445	0.184419	no
ADENINE	A305_29	CONTROL	C5	poor	fed	One	328373	0.15525	no
ADENINE	A306_30	CONTROL	C6	poor	fed	One	369421	0.296719	no
ADENINE	A325_31	SELECTED	S1	poor	fed	One	325067	0.143099	no
ADENINE	A326_32	SELECTED	S2	poor	fed	One	271658	-0.0724698	no
ADENINE	A327_33	SELECTED	S3	poor	fed	One	316888	0.112495	no
ADENINE	A328_34	SELECTED	S4	poor	fed	One	267490	-0.0910422	no
ADENINE	A329_35	SELECTED	S5	poor	fed	One	298533	0.0408277	no
ADENINE	A330_36	SELECTED	S6	poor	fed	One	483403	0.619694	no
ADENINE	AS101_13	CONTROL	C1	standard	starved	One	217362	-0.340277	no
ADENINE	AS102_14	CONTROL	C2	standard	starved	One	316407	0.110668	no
ADENINE	AS103_15	CONTROL	C3	standard	starved	One	311414	0.0915652	no
ADENINE	AS104_16	CONTROL	C4	standard	starved	One	379210	0.328129	no
ADENINE	AS105_17	CONTROL	C5	standard	starved	One	301471	0.0525927	no
ADENINE	AS106_18	CONTROL	C6	standard	starved	One	250313	-0.170753	no
ADENINE	AS125_19	SELECTED	S1	standard	starved	One	224401	-0.301999	no
ADENINE	AS126_20	SELECTED	S2	standard	starved	One	276098	-0.053001	no
ADENINE	AS127_21	SELECTED	S3	standard	starved	One	325015	0.142906	no
ADENINE	AS128_22	SELECTED	S4	standard	starved	One	329011	0.157584	no
ADENINE	AS129_23	SELECTED	S5	standard	starved	One	227161	-0.287316	no
ADENINE	AS130_24	SELECTED	S6	standard	starved	One	187726	-0.516328	no
ADENINE	AS301_37	CONTROL	C1	poor	starved	One	158124	-0.722432	no
ADENINE	AS302_38	CONTROL	C2	poor	starved	One	425346	0.466024	no
ADENINE	AS303_39	CONTROL	C3	poor	starved	One	360706	0.268045	no
ADENINE	AS304_40	CONTROL	C4	poor	starved	One	317394	0.114409	no
ADENINE	AS305_41	CONTROL	C5	poor	starved	One	276657	-0.0505727	no
ADENINE	AS306_42	CONTROL	C6	poor	starved	One	284448	-0.017217	no
ADENINE	AS325_43	SELECTED	S1	poor	starved	One	265364	-0.100625	no
ADENINE	AS326_44	SELECTED	S2	poor	starved	One	434895	0.492687	no
ADENINE	AS327_45	SELECTED	S3	poor	starved	One	144317	-0.832165	no
ADENINE	AS328_46	SELECTED	S4	poor	starved	One	355398	0.25024	no
ADENINE	AS329_47	SELECTED	S5	poor	starved	One	214468	-0.356379	no
ADENINE	AS330_48	SELECTED	S6	poor	starved	One	185413	-0.531218	no
ADENOSINE	A201_1	CONTROL	C1	standard	fed	Two	9.56822e+06	0.588957	no
ADENOSINE	A202_2	CONTROL	C2	standard	fed	Two	6.69385e+06	0.14012	no
ADENOSINE	A203_3	CONTROL	C3	standard	fed	Two	5.8762e+06	-0.0235542	no
ADENOSINE	A204_4	CONTROL	C4	standard	fed	Two	9.28956e+06	0.551823	no
ADENOSINE	A205_5	CONTROL	C5	standard	fed	Two	8.55732e+06	0.448673	no
ADENOSINE	A206_6	CONTROL	C6	standard	fed	Two	7.35976e+06	0.259269	no
ADENOSINE	A225_7	SELECTED	S1	standard	fed	Two	5.02327e+06	-0.220585	no
ADENOSINE	A226_8	SELECTED	S2	standard	fed	Two	5.75968e+06	-0.048717	no
ADENOSINE	A227_9	SELECTED	S3	standard	fed	Two	9.51753e+06	0.582283	no
ADENOSINE	A228_10	SELECTED	S4	standard	fed	Two	8.52274e+06	0.443586	no
ADENOSINE	A229_11	SELECTED	S5	standard	fed	Two	5.87375e+06	-0.0240785	no
ADENOSINE	A230_12	SELECTED	S6	standard	fed	Two	4.49758e+06	-0.359463	no
ADENOSINE	A401_25	CONTROL	C1	poor	fed	Two	7.78184e+06	0.329329	no
ADENOSINE	A402_26	CONTROL	C2	poor	fed	Two	1.18322e+07	0.855769	no
ADENOSINE	A403_27	CONTROL	C3	poor	fed	Two	4.23707e+06	-0.434424	no
ADENOSINE	A404_28	CONTROL	C4	poor	fed	Two	8.03351e+06	0.369316	no
ADENOSINE	A405_29	CONTROL	C5	poor	fed	Two	6.06128e+06	0.0154057	no
ADENOSINE	A406_30	CONTROL	C6	poor	fed	Two	8.14152e+06	0.386096	no
ADENOSINE	A425_31	SELECTED	S1	poor	fed	Two	6.39921e+06	0.083566	no
ADENOSINE	A426_32	SELECTED	S2	poor	fed	Two	4.74106e+06	-0.293226	no
ADENOSINE	A427_33	SELECTED	S3	poor	fed	Two	5.39589e+06	-0.130686	no
ADENOSINE	A428_34	SELECTED	S4	poor	fed	Two	6.34887e+06	0.0736435	no
ADENOSINE	A429_35	SELECTED	S5	poor	fed	Two	6.71245e+06	0.143606	no
ADENOSINE	A430_36	SELECTED	S6	poor	fed	Two	3.92629e+06	-0.530128	no
ADENOSINE	AS201_13	CONTROL	C1	standard	starved	Two	4.47893e+06	-0.364682	no
ADENOSINE	AS202_14	CONTROL	C2	standard	starved	Two	6.91382e+06	0.180742	no
ADENOSINE	AS203_15	CONTROL	C3	standard	starved	Two	5.9118e+06	-0.0159663	no
ADENOSINE	AS204_16	CONTROL	C4	standard	starved	Two	7.41336e+06	0.268386	no
ADENOSINE	AS205_17	CONTROL	C5	standard	starved	Two	4.81973e+06	-0.272552	no
ADENOSINE	AS206_18	CONTROL	C6	standard	starved	Two	5.81025e+06	-0.0377342	no
ADENOSINE	AS225_19	SELECTED	S1	standard	starved	Two	5.04783e+06	-0.214457	no
ADENOSINE	AS226_20	SELECTED	S2	standard	starved	Two	4.38209e+06	-0.392145	no
ADENOSINE	AS227_21	SELECTED	S3	standard	starved	Two	4.79896e+06	-0.277977	no
ADENOSINE	AS228_22	SELECTED	S4	standard	starved	Two	5.69871e+06	-0.0620876	no
ADENOSINE	AS229_23	SELECTED	S5	standard	starved	Two	5.23062e+06	-0.169766	no
ADENOSINE	AS230_24	SELECTED	S6	standard	starved	Two	4.44148e+06	-0.375231	no
ADENOSINE	AS401_37	CONTROL	C1	poor	starved	Two	4.47105e+06	-0.366895	no
ADENOSINE	AS402_38	CONTROL	C2	poor	starved	Two	8.83552e+06	0.488868	no
ADENOSINE	AS403_39	CONTROL	C3	poor	starved	Two	5.82557e+06	-0.0344263	no
ADENOSINE	AS404_40	CONTROL	C4	poor	starved	Two	5.98868e+06	0.000266508	no
ADENOSINE	AS405_41	CONTROL	C5	poor	starved	Two	5.66839e+06	-0.0687892	no
ADENOSINE	AS406_42	CONTROL	C6	poor	starved	Two	6.63282e+06	0.128614	no
ADENOSINE	AS425_43	SELECTED	S1	poor	starved	Two	3.0435e+06	-0.850099	no
ADENOSINE	AS426_44	SELECTED	S2	poor	starved	Two	4.12563e+06	-0.467911	no
ADENOSINE	AS427_45	SELECTED	S3	poor	starved	Two	5.62192e+06	-0.0791308	no
ADENOSINE	AS428_46	SELECTED	S4	poor	starved	Two	4.86021e+06	-0.262044	no
ADENOSINE	AS429_47	SELECTED	S5	poor	starved	Two	6.89292e+06	0.176938	no
ADENOSINE	AS430_48	SELECTED	S6	poor	starved	Two	5.36242e+06	-0.138502	no
ADENOSINE	A101_1	CONTROL	C1	standard	fed	One	3.65959e+06	-0.223175	no
ADENOSINE	A102_2	CONTROL	C2	standard	fed	One	4.18678e+06	-0.0702514	no
ADENOSINE	A103_3	CONTROL	C3	standard	fed	One	4.38922e+06	-0.0165967	no
ADENOSINE	A104_4	CONTROL	C4	standard	fed	One	8.97145e+06	0.795736	no
ADENOSINE	A105_5	CONTROL	C5	standard	fed	One	7.33566e+06	0.567	no
ADENOSINE	A106_6	CONTROL	C6	standard	fed	One	3.55638e+06	-0.255682	no
ADENOSINE	A125_7	SELECTED	S1	standard	fed	One	3.48628e+06	-0.278302	no
ADENOSINE	A126_8	SELECTED	S2	standard	fed	One	2.39121e+06	-0.706727	no
ADENOSINE	A127_9	SELECTED	S3	standard	fed	One	4.70425e+06	0.062165	no
ADENOSINE	A128_10	SELECTED	S4	standard	fed	One	3.59517e+06	-0.243356	no
ADENOSINE	A129_11	SELECTED	S5	standard	fed	One	3.54484e+06	-0.259374	no
ADENOSINE	A130_12	SELECTED	S6	standard	fed	One	4.15346e+06	-0.0793304	no
ADENOSINE	A301_25	CONTROL	C1	poor	fed	One	4.26454e+06	-0.0493419	no
ADENOSINE	A302_26	CONTROL	C2	poor	fed	One	7.54155e+06	0.598452	no
ADENOSINE	A303_27	CONTROL	C3	poor	fed	One	7.45442e+06	0.585248	no
ADENOSINE	A304_28	CONTROL	C4	poor	fed	One	5.12129e+06	0.158682	no
ADENOSINE	A305_29	CONTROL	C5	poor	fed	One	4.79868e+06	0.0847485	no
ADENOSINE	A306_30	CONTROL	C6	poor	fed	One	6.29443e+06	0.393052	no
ADENOSINE	A325_31	SELECTED	S1	poor	fed	One	5.39527e+06	0.217903	no
ADENOSINE	A326_32	SELECTED	S2	poor	fed	One	4.28076e+06	-0.0450282	no
ADENOSINE	A327_33	SELECTED	S3	poor	fed	One	4.40151e+06	-0.0134193	no
ADENOSINE	A328_34	SELECTED	S4	poor	fed	One	3.80447e+06	-0.179057	no
ADENOSINE	A329_35	SELECTED	S5	poor	fed	One	5.15699e+06	0.166576	no
ADENOSINE	A330_36	SELECTED	S6	poor	fed	One	8.14855e+06	0.686415	no
ADENOSINE	AS101_13	CONTROL	C1	standard	starved	One	3.67941e+06	-0.217039	no
ADENOSINE	AS102_14	CONTROL	C2	standard	starved	One	5.37939e+06	0.214552	no
ADENOSINE	AS103_15	CONTROL	C3	standard	starved	One	4.56632e+06	0.0283522	no
ADENOSINE	AS104_16	CONTROL	C4	standard	starved	One	5.92893e+06	0.325078	no
ADENOSINE	AS105_17	CONTROL	C5	standard	starved	One	4.8259e+06	0.0911761	no
ADENOSINE	AS106_18	CONTROL	C6	standard	starved	One	4.2751e+06	-0.0465316	no
ADENOSINE	AS125_19	SELECTED	S1	standard	starved	One	3.80645e+06	-0.178467	no
ADENOSINE	AS126_20	SELECTED	S2	standard	starved	One	3.57426e+06	-0.249982	no
ADENOSINE	AS127_21	SELECTED	S3	standard	starved	One	4.53146e+06	0.0196421	no
ADENOSINE	AS128_22	SELECTED	S4	standard	starved	One	5.53871e+06	0.247718	no
ADENOSINE	AS129_23	SELECTED	S5	standard	starved	One	3.32316e+06	-0.332752	no
ADENOSINE	AS130_24	SELECTED	S6	standard	starved	One	2.56518e+06	-0.626924	no
ADENOSINE	AS301_37	CONTROL	C1	poor	starved	One	2.36371e+06	-0.719868	no
ADENOSINE	AS302_38	CONTROL	C2	poor	starved	One	7.01217e+06	0.515753	no
ADENOSINE	AS303_39	CONTROL	C3	poor	starved	One	5.18172e+06	0.172012	no
ADENOSINE	AS304_40	CONTROL	C4	poor	starved	One	5.23176e+06	0.182932	no
ADENOSINE	AS305_41	CONTROL	C5	poor	starved	One	4.11964e+06	-0.0886224	no
ADENOSINE	AS306_42	CONTROL	C6	poor	starved	One	4.24194e+06	-0.0553794	no
ADENOSINE	AS325_43	SELECTED	S1	poor	starved	One	3.95708e+06	-0.134368	no
ADENOSINE	AS326_44	SELECTED	S2	poor	starved	One	7.68375e+06	0.619678	no
ADENOSINE	AS327_45	SELECTED	S3	poor	starved	One	2.09736e+06	-0.855719	no
ADENOSINE	AS328_46	SELECTED	S4	poor	starved	One	5.91981e+06	0.323329	no
ADENOSINE	AS329_47	SELECTED	S5	poor	starved	One	2.70996e+06	-0.564535	no
ADENOSINE	AS330_48	SELECTED	S6	poor	starved	One	2.70559e+06	-0.566371	no
ADP	A201_1	CONTROL	C1	standard	fed	Two	110378	0.0134525	no
ADP	A202_2	CONTROL	C2	standard	fed	Two	126750	0.199184	no
ADP	A203_3	CONTROL	C3	standard	fed	Two	142539	0.356836	no
ADP	A204_4	CONTROL	C4	standard	fed	Two	81688	-0.390771	no
ADP	A205_5	CONTROL	C5	standard	fed	Two	131735	0.250979	no
ADP	A206_6	CONTROL	C6	standard	fed	Two	99637.5	-0.124029	no
ADP	A225_7	SELECTED	S1	standard	fed	Two	161913	0.527975	no
ADP	A226_8	SELECTED	S2	standard	fed	Two	134369	0.277571	no
ADP	A227_9	SELECTED	S3	standard	fed	Two	158331	0.497935	no
ADP	A228_10	SELECTED	S4	standard	fed	Two	101152	-0.103767	no
ADP	A229_11	SELECTED	S5	standard	fed	Two	111514	0.0271924	no
ADP	A230_12	SELECTED	S6	standard	fed	Two	88534.4	-0.282689	no
ADP	A401_25	CONTROL	C1	poor	fed	Two	73358.7	-0.535196	no
ADP	A402_26	CONTROL	C2	poor	fed	Two	89282.1	-0.271396	no
ADP	A403_27	CONTROL	C3	poor	fed	Two	86111.5	-0.319952	no
ADP	A404_28	CONTROL	C4	poor	fed	Two	112443	0.0383399	no
ADP	A405_29	CONTROL	C5	poor	fed	Two	65600.6	-0.6853	no
ADP	A406_30	CONTROL	C6	poor	fed	Two	91980.7	-0.231407	no
ADP	A425_31	SELECTED	S1	poor	fed	Two	103300	-0.0755538	no
ADP	A426_32	SELECTED	S2	poor	fed	Two	112318	0.0368416	no
ADP	A427_33	SELECTED	S3	poor	fed	Two	141975	0.351512	no
ADP	A428_34	SELECTED	S4	poor	fed	Two	139804	0.330813	no
ADP	A429_35	SELECTED	S5	poor	fed	Two	148825	0.414785	no
ADP	A430_36	SELECTED	S6	poor	fed	Two	104957	-0.0541757	no
ADP	AS201_13	CONTROL	C1	standard	starved	Two	86422.6	-0.315109	no
ADP	AS202_14	CONTROL	C2	standard	starved	Two	159352	0.506566	no
ADP	AS203_15	CONTROL	C3	standard	starved	Two	108621	-0.00809543	no
ADP	AS204_16	CONTROL	C4	standard	starved	Two	107809	-0.0181789	no
ADP	AS205_17	CONTROL	C5	standard	starved	Two	123778	0.167315	no
ADP	AS206_18	CONTROL	C6	standard	starved	Two	79150.9	-0.433141	no
ADP	AS225_19	SELECTED	S1	standard	starved	Two	116752	0.0888362	no
ADP	AS226_20	SELECTED	S2	standard	starved	Two	86338.8	-0.316412	no
ADP	AS227_21	SELECTED	S3	standard	starved	Two	133561	0.269472	no
ADP	AS228_22	SELECTED	S4	standard	starved	Two	167608	0.5744	no
ADP	AS229_23	SELECTED	S5	standard	starved	Two	103115	-0.077959	no
ADP	AS230_24	SELECTED	S6	standard	starved	Two	144936	0.379225	no
ADP	AS401_37	CONTROL	C1	poor	starved	Two	85151.7	-0.335005	no
ADP	AS402_38	CONTROL	C2	poor	starved	Two	124038	0.170137	no
ADP	AS403_39	CONTROL	C3	poor	starved	Two	108800	-0.00588857	no
ADP	AS404_40	CONTROL	C4	poor	starved	Two	115043	0.0690336	no
ADP	AS405_41	CONTROL	C5	poor	starved	Two	120985	0.136666	no
ADP	AS406_42	CONTROL	C6	poor	starved	Two	95341.2	-0.183219	no
ADP	AS425_43	SELECTED	S1	poor	starved	Two	98347	-0.141535	no
ADP	AS426_44	SELECTED	S2	poor	starved	Two	128732	0.220011	no
ADP	AS427_45	SELECTED	S3	poor	starved	Two	92045.8	-0.230457	no
ADP	AS428_46	SELECTED	S4	poor	starved	Two	101446	-0.0998704	no
ADP	AS429_47	SELECTED	S5	poor	starved	Two	56034.1	-0.896974	no
ADP	AS430_48	SELECTED	S6	poor	starved	Two	129790	0.231005	no
ADP	A101_1	CONTROL	C1	standard	fed	One	177485	-0.315129	no
ADP	A102_2	CONTROL	C2	standard	fed	One	228543	0.00561753	no
ADP	A103_3	CONTROL	C3	standard	fed	One	165011	-0.407572	no
ADP	A104_4	CONTROL	C4	standard	fed	One	206842	-0.120944	no
ADP	A105_5	CONTROL	C5	standard	fed	One	221523	-0.0339575	no
ADP	A106_6	CONTROL	C6	standard	fed	One	187569	-0.245023	no
ADP	A125_7	SELECTED	S1	standard	fed	One	186962	-0.249138	no
ADP	A126_8	SELECTED	S2	standard	fed	One	302100	0.359588	no
ADP	A127_9	SELECTED	S3	standard	fed	One	349344	0.54391	no
ADP	A128_10	SELECTED	S4	standard	fed	One	245881	0.0983783	no
ADP	A129_11	SELECTED	S5	standard	fed	One	163562	-0.418759	no
ADP	A130_12	SELECTED	S6	standard	fed	One	140631	-0.610379	no
ADP	A301_25	CONTROL	C1	poor	fed	One	201031	-0.157097	no
ADP	A302_26	CONTROL	C2	poor	fed	One	280250	0.26435	no
ADP	A303_27	CONTROL	C3	poor	fed	One	242877	0.0827841	no
ADP	A304_28	CONTROL	C4	poor	fed	One	163766	-0.417178	no
ADP	A305_29	CONTROL	C5	poor	fed	One	249555	0.117194	no
ADP	A306_30	CONTROL	C6	poor	fed	One	200708	-0.159138	no
ADP	A325_31	SELECTED	S1	poor	fed	One	229619	0.0115775	no
ADP	A326_32	SELECTED	S2	poor	fed	One	258817	0.163423	no
ADP	A327_33	SELECTED	S3	poor	fed	One	248145	0.110008	no
ADP	A328_34	SELECTED	S4	poor	fed	One	276414	0.246867	no
ADP	A329_35	SELECTED	S5	poor	fed	One	340606	0.511775	no
ADP	A330_36	SELECTED	S6	poor	fed	One	198944	-0.170332	no
ADP	AS101_13	CONTROL	C1	standard	starved	One	190687	-0.22411	no
ADP	AS102_14	CONTROL	C2	standard	starved	One	223542	-0.0224531	no
ADP	AS103_15	CONTROL	C3	standard	starved	One	242552	0.0810878	no
ADP	AS104_16	CONTROL	C4	standard	starved	One	192332	-0.213215	no
ADP	AS105_17	CONTROL	C5	standard	starved	One	198640	-0.172273	no
ADP	AS106_18	CONTROL	C6	standard	starved	One	137906	-0.635206	no
ADP	AS125_19	SELECTED	S1	standard	starved	One	233520	0.0329469	no
ADP	AS126_20	SELECTED	S2	standard	starved	One	288207	0.299867	no
ADP	AS127_21	SELECTED	S3	standard	starved	One	321844	0.4399	no
ADP	AS128_22	SELECTED	S4	standard	starved	One	276467	0.247111	no
ADP	AS129_23	SELECTED	S5	standard	starved	One	140437	-0.612133	no
ADP	AS130_24	SELECTED	S6	standard	starved	One	150724	-0.522454	no
ADP	AS301_37	CONTROL	C1	poor	starved	One	224312	-0.0180901	no
ADP	AS302_38	CONTROL	C2	poor	starved	One	297307	0.339302	no
ADP	AS303_39	CONTROL	C3	poor	starved	One	313302	0.405776	no
ADP	AS304_40	CONTROL	C4	poor	starved	One	290646	0.310555	no
ADP	AS305_41	CONTROL	C5	poor	starved	One	253825	0.138717	no
ADP	AS306_42	CONTROL	C6	poor	starved	One	286335	0.291598	no
ADP	AS325_43	SELECTED	S1	poor	starved	One	237837	0.056184	no
ADP	AS326_44	SELECTED	S2	poor	starved	One	119081	-0.821387	no
ADP	AS327_45	SELECTED	S3	poor	starved	One	349109	0.543057	no
ADP	AS328_46	SELECTED	S4	poor	starved	One	215859	-0.0668167	no
ADP	AS329_47	SELECTED	S5	poor	starved	One	348740	0.541714	no
ADP	AS330_48	SELECTED	S6	poor	starved	One	304468	0.369493	no
AGMATINE	A201_1	CONTROL	C1	standard	fed	Two	31950	0.592968	no
AGMATINE	A202_2	CONTROL	C2	standard	fed	Two	16809.9	0.131618	no
AGMATINE	A203_3	CONTROL	C3	standard	fed	Two	15720.5	0.0834876	no
AGMATINE	A204_4	CONTROL	C4	standard	fed	Two	29234.3	0.529154	no
AGMATINE	A205_5	CONTROL	C5	standard	fed	Two	18249.2	0.190636	no
AGMATINE	A206_6	CONTROL	C6	standard	fed	Two	22860.9	0.352494	no
AGMATINE	A225_7	SELECTED	S1	standard	fed	Two	24271.4	0.395504	no
AGMATINE	A226_8	SELECTED	S2	standard	fed	Two	36002.4	0.678754	no
AGMATINE	A227_9	SELECTED	S3	standard	fed	Two	28136.1	0.501649	no
AGMATINE	A228_10	SELECTED	S4	standard	fed	Two	26129.5	0.448497	no
AGMATINE	A229_11	SELECTED	S5	standard	fed	Two	33894.9	0.63542	no
AGMATINE	A230_12	SELECTED	S6	standard	fed	Two	26149.9	0.449056	no
AGMATINE	A401_25	CONTROL	C1	poor	fed	Two	31346.8	0.579275	no
AGMATINE	A402_26	CONTROL	C2	poor	fed	Two	18018.8	0.181509	no
AGMATINE	A403_27	CONTROL	C3	poor	fed	Two	19863.6	0.251532	no
AGMATINE	A404_28	CONTROL	C4	poor	fed	Two	26709.8	0.464276	no
AGMATINE	A405_29	CONTROL	C5	poor	fed	Two	19623.8	0.242807	no
AGMATINE	A406_30	CONTROL	C6	poor	fed	Two	38404.8	0.725158	no
AGMATINE	A425_31	SELECTED	S1	poor	fed	Two	39059.2	0.737297	no
AGMATINE	A426_32	SELECTED	S2	poor	fed	Two	54533.8	0.977051	no
AGMATINE	A427_33	SELECTED	S3	poor	fed	Two	45561.9	0.847923	no
AGMATINE	A428_34	SELECTED	S4	poor	fed	Two	43521.4	0.815006	no
AGMATINE	A429_35	SELECTED	S5	poor	fed	Two	38346.6	0.724069	no
AGMATINE	A430_36	SELECTED	S6	poor	fed	Two	27421.7	0.483171	no
AGMATINE	AS201_13	CONTROL	C1	standard	starved	Two	4726.51	-0.779854	no
AGMATINE	AS202_14	CONTROL	C2	standard	starved	Two	4393.33	-0.832367	no
AGMATINE	AS203_15	CONTROL	C3	standard	starved	Two	3311.43	-1.03546	no
AGMATINE	AS204_16	CONTROL	C4	standard	starved	Two	2221.12	-1.32236	no
AGMATINE	AS205_17	CONTROL	C5	standard	starved	Two	4143.98	-0.874342	no
AGMATINE	AS206_18	CONTROL	C6	standard	starved	Two	4507.58	-0.813923	no
AGMATINE	AS225_19	SELECTED	S1	standard	starved	Two	6917.46	-0.506248	no
AGMATINE	AS226_20	SELECTED	S2	standard	starved	Two	11798.3	-0.122695	no
AGMATINE	AS227_21	SELECTED	S3	standard	starved	Two	7344.07	-0.463256	no
AGMATINE	AS228_22	SELECTED	S4	standard	starved	Two	5635.55	-0.653483	no
AGMATINE	AS229_23	SELECTED	S5	standard	starved	Two	6205.92	-0.584226	no
AGMATINE	AS230_24	SELECTED	S6	standard	starved	Two	4836.4	-0.763341	no
AGMATINE	AS401_37	CONTROL	C1	poor	starved	Two	6168.7	-0.588546	no
AGMATINE	AS402_38	CONTROL	C2	poor	starved	Two	4545.52	-0.807903	no
AGMATINE	AS403_39	CONTROL	C3	poor	starved	Two	5651.81	-0.651414	no
AGMATINE	AS404_40	CONTROL	C4	poor	starved	Two	6951.95	-0.502675	no
AGMATINE	AS405_41	CONTROL	C5	poor	starved	Two	6604.79	-0.539476	no
AGMATINE	AS406_42	CONTROL	C6	poor	starved	Two	6720.66	-0.526982	no
AGMATINE	AS425_43	SELECTED	S1	poor	starved	Two	19008.1	0.219905	no
AGMATINE	AS426_44	SELECTED	S2	poor	starved	Two	20683.6	0.280593	no
AGMATINE	AS427_45	SELECTED	S3	poor	starved	Two	14731.9	0.0368279	no
AGMATINE	AS428_46	SELECTED	S4	poor	starved	Two	14481.1	0.0244916	no
AGMATINE	AS429_47	SELECTED	S5	poor	starved	Two	14405.7	0.0207402	no
AGMATINE	AS430_48	SELECTED	S6	poor	starved	Two	10128.6	-0.232317	no
AGMATINE	A101_1	CONTROL	C1	standard	fed	One	38037	0.496002	no
AGMATINE	A102_2	CONTROL	C2	standard	fed	One	22560.8	0.110979	no
AGMATINE	A103_3	CONTROL	C3	standard	fed	One	26752.3	0.236588	no
AGMATINE	A104_4	CONTROL	C4	standard	fed	One	30125.6	0.324122	no
AGMATINE	A105_5	CONTROL	C5	standard	fed	One	26224.1	0.221887	no
AGMATINE	A106_6	CONTROL	C6	standard	fed	One	31338.2	0.353209	no
AGMATINE	A125_7	SELECTED	S1	standard	fed	One	30993.4	0.345054	no
AGMATINE	A126_8	SELECTED	S2	standard	fed	One	62837	0.866018	no
AGMATINE	A127_9	SELECTED	S3	standard	fed	One	39691.7	0.527391	no
AGMATINE	A128_10	SELECTED	S4	standard	fed	One	37094.2	0.477502	no
AGMATINE	A129_11	SELECTED	S5	standard	fed	One	43713.8	0.598538	no
AGMATINE	A130_12	SELECTED	S6	standard	fed	One	51341.3	0.717087	no
AGMATINE	A301_25	CONTROL	C1	poor	fed	One	28180.9	0.274933	no
AGMATINE	A302_26	CONTROL	C2	poor	fed	One	36441.2	0.46441	no
AGMATINE	A303_27	CONTROL	C3	poor	fed	One	44378.7	0.609665	no
AGMATINE	A304_28	CONTROL	C4	poor	fed	One	49593	0.691549	no
AGMATINE	A305_29	CONTROL	C5	poor	fed	One	41261.9	0.555989	no
AGMATINE	A306_30	CONTROL	C6	poor	fed	One	53199.9	0.7433	no
AGMATINE	A325_31	SELECTED	S1	poor	fed	One	53038.4	0.741059	no
AGMATINE	A326_32	SELECTED	S2	poor	fed	One	52266.9	0.730258	no
AGMATINE	A327_33	SELECTED	S3	poor	fed	One	62013.7	0.856298	no
AGMATINE	A328_34	SELECTED	S4	poor	fed	One	54805.2	0.765212	no
AGMATINE	A329_35	SELECTED	S5	poor	fed	One	34230.5	0.418281	no
AGMATINE	A330_36	SELECTED	S6	poor	fed	One	42394.2	0.575944	no
AGMATINE	AS101_13	CONTROL	C1	standard	starved	One	8306.87	-0.625486	no
AGMATINE	AS102_14	CONTROL	C2	standard	starved	One	5468.92	-0.933597	no
AGMATINE	AS103_15	CONTROL	C3	standard	starved	One	6500.34	-0.806245	no
AGMATINE	AS104_16	CONTROL	C4	standard	starved	One	9183.95	-0.551499	no
AGMATINE	AS105_17	CONTROL	C5	standard	starved	One	6557.51	-0.799791	no
AGMATINE	AS106_18	CONTROL	C6	standard	starved	One	7483.13	-0.702463	no
AGMATINE	AS125_19	SELECTED	S1	standard	starved	One	11887.9	-0.361282	no
AGMATINE	AS126_20	SELECTED	S2	standard	starved	One	13031.3	-0.293587	no
AGMATINE	AS127_21	SELECTED	S3	standard	starved	One	11403.2	-0.391966	no
AGMATINE	AS128_22	SELECTED	S4	standard	starved	One	8323.69	-0.623995	no
AGMATINE	AS129_23	SELECTED	S5	standard	starved	One	5946.75	-0.871854	no
AGMATINE	AS130_24	SELECTED	S6	standard	starved	One	9081.3	-0.559784	no
AGMATINE	AS301_37	CONTROL	C1	poor	starved	One	6266.96	-0.833196	no
AGMATINE	AS302_38	CONTROL	C2	poor	starved	One	8004.56	-0.652812	no
AGMATINE	AS303_39	CONTROL	C3	poor	starved	One	5387.8	-0.944612	no
AGMATINE	AS304_40	CONTROL	C4	poor	starved	One	11185.1	-0.406196	no
AGMATINE	AS305_41	CONTROL	C5	poor	starved	One	10571.6	-0.44778	no
AGMATINE	AS306_42	CONTROL	C6	poor	starved	One	9312.09	-0.541286	no
AGMATINE	AS325_43	SELECTED	S1	poor	starved	One	21502.2	0.0755535	no
AGMATINE	AS326_44	SELECTED	S2	poor	starved	One	17790.2	-0.0641321	no
AGMATINE	AS327_45	SELECTED	S3	poor	starved	One	17499.2	-0.0762886	no
AGMATINE	AS328_46	SELECTED	S4	poor	starved	One	11323.8	-0.397113	no
AGMATINE	AS329_47	SELECTED	S5	poor	starved	One	15144.2	-0.182829	no
AGMATINE	AS330_48	SELECTED	S6	poor	starved	One	7416.71	-0.709035	no
ALANINE	A201_1	CONTROL	C1	standard	fed	Two	461560	0.423858	no
ALANINE	A202_2	CONTROL	C2	standard	fed	Two	391443	0.237196	no
ALANINE	A203_3	CONTROL	C3	standard	fed	Two	369595	0.172132	no
ALANINE	A204_4	CONTROL	C4	standard	fed	Two	310566	-0.0249975	no
ALANINE	A205_5	CONTROL	C5	standard	fed	Two	405544	0.277288	no
ALANINE	A206_6	CONTROL	C6	standard	fed	Two	439752	0.369027	no
ALANINE	A225_7	SELECTED	S1	standard	fed	Two	371093	0.176715	no
ALANINE	A226_8	SELECTED	S2	standard	fed	Two	350944	0.113472	no
ALANINE	A227_9	SELECTED	S3	standard	fed	Two	297799	-0.0725518	no
ALANINE	A228_10	SELECTED	S4	standard	fed	Two	268092	-0.191604	no
ALANINE	A229_11	SELECTED	S5	standard	fed	Two	458412	0.416106	no
ALANINE	A230_12	SELECTED	S6	standard	fed	Two	298970	-0.068108	no
ALANINE	A401_25	CONTROL	C1	poor	fed	Two	217494	-0.428553	no
ALANINE	A402_26	CONTROL	C2	poor	fed	Two	288082	-0.110133	no
ALANINE	A403_27	CONTROL	C3	poor	fed	Two	163406	-0.752471	no
ALANINE	A404_28	CONTROL	C4	poor	fed	Two	133803	-0.978898	no
ALANINE	A405_29	CONTROL	C5	poor	fed	Two	262775	-0.214297	no
ALANINE	A406_30	CONTROL	C6	poor	fed	Two	359462	0.140639	no
ALANINE	A425_31	SELECTED	S1	poor	fed	Two	212454	-0.455111	no
ALANINE	A426_32	SELECTED	S2	poor	fed	Two	329157	0.0408652	no
ALANINE	A427_33	SELECTED	S3	poor	fed	Two	188031	-0.593453	no
ALANINE	A428_34	SELECTED	S4	poor	fed	Two	225394	-0.388134	no
ALANINE	A429_35	SELECTED	S5	poor	fed	Two	249739	-0.271937	no
ALANINE	A430_36	SELECTED	S6	poor	fed	Two	216007	-0.436323	no
ALANINE	AS201_13	CONTROL	C1	standard	starved	Two	367325	0.165154	no
ALANINE	AS202_14	CONTROL	C2	standard	starved	Two	352537	0.118602	no
ALANINE	AS203_15	CONTROL	C3	standard	starved	Two	512307	0.54203	no
ALANINE	AS204_16	CONTROL	C4	standard	starved	Two	264129	-0.208474	no
ALANINE	AS205_17	CONTROL	C5	standard	starved	Two	399161	0.259314	no
ALANINE	AS206_18	CONTROL	C6	standard	starved	Two	475340	0.457185	no
ALANINE	AS225_19	SELECTED	S1	standard	starved	Two	455826	0.409697	no
ALANINE	AS226_20	SELECTED	S2	standard	starved	Two	354810	0.125883	no
ALANINE	AS227_21	SELECTED	S3	standard	starved	Two	436697	0.36113	no
ALANINE	AS228_22	SELECTED	S4	standard	starved	Two	443700	0.379154	no
ALANINE	AS229_23	SELECTED	S5	standard	starved	Two	567784	0.658508	no
ALANINE	AS230_24	SELECTED	S6	standard	starved	Two	559718	0.642299	no
ALANINE	AS401_37	CONTROL	C1	poor	starved	Two	229127	-0.369521	no
ALANINE	AS402_38	CONTROL	C2	poor	starved	Two	423567	0.326545	no
ALANINE	AS403_39	CONTROL	C3	poor	starved	Two	365123	0.158341	no
ALANINE	AS404_40	CONTROL	C4	poor	starved	Two	210963	-0.463091	no
ALANINE	AS405_41	CONTROL	C5	poor	starved	Two	359835	0.141816	no
ALANINE	AS406_42	CONTROL	C6	poor	starved	Two	317054	-0.00157643	no
ALANINE	AS425_43	SELECTED	S1	poor	starved	Two	194559	-0.554794	no
ALANINE	AS426_44	SELECTED	S2	poor	starved	Two	209008	-0.473636	no
ALANINE	AS427_45	SELECTED	S3	poor	starved	Two	453525	0.403964	no
ALANINE	AS428_46	SELECTED	S4	poor	starved	Two	205197	-0.494484	no
ALANINE	AS429_47	SELECTED	S5	poor	starved	Two	325340	0.0276531	no
ALANINE	AS430_48	SELECTED	S6	poor	starved	Two	319624	0.00757202	no
ALANINE	A101_1	CONTROL	C1	standard	fed	One	538127	0.401103	no
ALANINE	A102_2	CONTROL	C2	standard	fed	One	530381	0.384389	no
ALANINE	A103_3	CONTROL	C3	standard	fed	One	436362	0.159459	no
ALANINE	A104_4	CONTROL	C4	standard	fed	One	391588	0.0346606	no
ALANINE	A105_5	CONTROL	C5	standard	fed	One	471875	0.249654	no
ALANINE	A106_6	CONTROL	C6	standard	fed	One	588048	0.503369	no
ALANINE	A125_7	SELECTED	S1	standard	fed	One	340819	-0.125409	no
ALANINE	A126_8	SELECTED	S2	standard	fed	One	451718	0.199328	no
ALANINE	A127_9	SELECTED	S3	standard	fed	One	446604	0.186204	no
ALANINE	A128_10	SELECTED	S4	standard	fed	One	314295	-0.218805	no
ALANINE	A129_11	SELECTED	S5	standard	fed	One	280049	-0.351795	no
ALANINE	A130_12	SELECTED	S6	standard	fed	One	531385	0.386569	no
ALANINE	A301_25	CONTROL	C1	poor	fed	One	243810	-0.511538	no
ALANINE	A302_26	CONTROL	C2	poor	fed	One	414415	0.0999725	no
ALANINE	A303_27	CONTROL	C3	poor	fed	One	247015	-0.496486	no
ALANINE	A304_28	CONTROL	C4	poor	fed	One	337615	-0.136299	no
ALANINE	A305_29	CONTROL	C5	poor	fed	One	359646	-0.0634266	no
ALANINE	A306_30	CONTROL	C6	poor	fed	One	363636	-0.0507074	no
ALANINE	A325_31	SELECTED	S1	poor	fed	One	278449	-0.358402	no
ALANINE	A326_32	SELECTED	S2	poor	fed	One	305173	-0.252758	no
ALANINE	A327_33	SELECTED	S3	poor	fed	One	174440	-0.897491	no
ALANINE	A328_34	SELECTED	S4	poor	fed	One	226106	-0.598437	no
ALANINE	A329_35	SELECTED	S5	poor	fed	One	401926	0.0646987	no
ALANINE	A330_36	SELECTED	S6	poor	fed	One	471639	0.249078	no
ALANINE	AS101_13	CONTROL	C1	standard	starved	One	547580	0.421177	no
ALANINE	AS102_14	CONTROL	C2	standard	starved	One	540318	0.405788	no
ALANINE	AS103_15	CONTROL	C3	standard	starved	One	469556	0.243976	no
ALANINE	AS104_16	CONTROL	C4	standard	starved	One	444103	0.179731	no
ALANINE	AS105_17	CONTROL	C5	standard	starved	One	478199	0.265	no
ALANINE	AS106_18	CONTROL	C6	standard	starved	One	434716	0.155104	no
ALANINE	AS125_19	SELECTED	S1	standard	starved	One	498558	0.313062	no
ALANINE	AS126_20	SELECTED	S2	standard	starved	One	407731	0.0812282	no
ALANINE	AS127_21	SELECTED	S3	standard	starved	One	661669	0.639343	no
ALANINE	AS128_22	SELECTED	S4	standard	starved	One	586396	0.500125	no
ALANINE	AS129_23	SELECTED	S5	standard	starved	One	451709	0.199306	no
ALANINE	AS130_24	SELECTED	S6	standard	starved	One	401250	0.0627592	no
ALANINE	AS301_37	CONTROL	C1	poor	starved	One	191885	-0.787617	no
ALANINE	AS302_38	CONTROL	C2	poor	starved	One	497373	0.310319	no
ALANINE	AS303_39	CONTROL	C3	poor	starved	One	261127	-0.43244	no
ALANINE	AS304_40	CONTROL	C4	poor	starved	One	355095	-0.078108	no
ALANINE	AS305_41	CONTROL	C5	poor	starved	One	456868	0.212398	no
ALANINE	AS306_42	CONTROL	C6	poor	starved	One	305462	-0.251666	no
ALANINE	AS325_43	SELECTED	S1	poor	starved	One	339516	-0.129826	no
ALANINE	AS326_44	SELECTED	S2	poor	starved	One	473312	0.253158	no
ALANINE	AS327_45	SELECTED	S3	poor	starved	One	199441	-0.743093	no
ALANINE	AS328_46	SELECTED	S4	poor	starved	One	516199	0.353146	no
ALANINE	AS329_47	SELECTED	S5	poor	starved	One	249397	-0.485422	no
ALANINE	AS330_48	SELECTED	S6	poor	starved	One	236962	-0.544382	no
ARGININE	A201_1	CONTROL	C1	standard	fed	Two	263527	0.0434039	no
ARGININE	A202_2	CONTROL	C2	standard	fed	Two	214199	-0.286892	no
ARGININE	A203_3	CONTROL	C3	standard	fed	Two	292468	0.209472	no
ARGININE	A204_4	CONTROL	C4	standard	fed	Two	213766	-0.290118	no
ARGININE	A205_5	CONTROL	C5	standard	fed	Two	243448	-0.0828982	no
ARGININE	A206_6	CONTROL	C6	standard	fed	Two	260659	0.0259687	no
ARGININE	A225_7	SELECTED	S1	standard	fed	Two	263009	0.0402689	no
ARGININE	A226_8	SELECTED	S2	standard	fed	Two	246912	-0.0603831	no
ARGININE	A227_9	SELECTED	S3	standard	fed	Two	284534	0.165639	no
ARGININE	A228_10	SELECTED	S4	standard	fed	Two	216237	-0.271799	no
ARGININE	A229_11	SELECTED	S5	standard	fed	Two	261751	0.0326275	no
ARGININE	A230_12	SELECTED	S6	standard	fed	Two	248209	-0.0520317	no
ARGININE	A401_25	CONTROL	C1	poor	fed	Two	198364	-0.40929	no
ARGININE	A402_26	CONTROL	C2	poor	fed	Two	215460	-0.277535	no
ARGININE	A403_27	CONTROL	C3	poor	fed	Two	206469	-0.345467	no
ARGININE	A404_28	CONTROL	C4	poor	fed	Two	174032	-0.61785	no
ARGININE	A405_29	CONTROL	C5	poor	fed	Two	163711	-0.715286	no
ARGININE	A406_30	CONTROL	C6	poor	fed	Two	296518	0.231387	no
ARGININE	A425_31	SELECTED	S1	poor	fed	Two	216372	-0.270803	no
ARGININE	A426_32	SELECTED	S2	poor	fed	Two	241516	-0.0955945	no
ARGININE	A427_33	SELECTED	S3	poor	fed	Two	265768	0.0569038	no
ARGININE	A428_34	SELECTED	S4	poor	fed	Two	271335	0.08994	no
ARGININE	A429_35	SELECTED	S5	poor	fed	Two	278360	0.130675	no
ARGININE	A430_36	SELECTED	S6	poor	fed	Two	206682	-0.343825	no
ARGININE	AS201_13	CONTROL	C1	standard	starved	Two	235891	-0.133153	no
ARGININE	AS202_14	CONTROL	C2	standard	starved	Two	269215	0.0774416	no
ARGININE	AS203_15	CONTROL	C3	standard	starved	Two	281287	0.147346	no
ARGININE	AS204_16	CONTROL	C4	standard	starved	Two	228940	-0.180821	no
ARGININE	AS205_17	CONTROL	C5	standard	starved	Two	263159	0.0411776	no
ARGININE	AS206_18	CONTROL	C6	standard	starved	Two	261454	0.0308184	no
ARGININE	AS225_19	SELECTED	S1	standard	starved	Two	282168	0.152333	no
ARGININE	AS226_20	SELECTED	S2	standard	starved	Two	288977	0.190333	no
ARGININE	AS227_21	SELECTED	S3	standard	starved	Two	392700	0.679126	no
ARGININE	AS228_22	SELECTED	S4	standard	starved	Two	311849	0.311728	no
ARGININE	AS229_23	SELECTED	S5	standard	starved	Two	285157	0.169125	no
ARGININE	AS230_24	SELECTED	S6	standard	starved	Two	285742	0.172392	no
ARGININE	AS401_37	CONTROL	C1	poor	starved	Two	256785	0.00210112	no
ARGININE	AS402_38	CONTROL	C2	poor	starved	Two	239393	-0.109666	no
ARGININE	AS403_39	CONTROL	C3	poor	starved	Two	279362	0.136403	no
ARGININE	AS404_40	CONTROL	C4	poor	starved	Two	256036	-0.00255468	no
ARGININE	AS405_41	CONTROL	C5	poor	starved	Two	259785	0.0206111	no
ARGININE	AS406_42	CONTROL	C6	poor	starved	Two	247964	-0.0536059	no
ARGININE	AS425_43	SELECTED	S1	poor	starved	Two	218339	-0.256386	no
ARGININE	AS426_44	SELECTED	S2	poor	starved	Two	263116	0.0409199	no
ARGININE	AS427_45	SELECTED	S3	poor	starved	Two	338906	0.444331	no
ARGININE	AS428_46	SELECTED	S4	poor	starved	Two	287849	0.1841	no
ARGININE	AS429_47	SELECTED	S5	poor	starved	Two	350042	0.495858	no
ARGININE	AS430_48	SELECTED	S6	poor	starved	Two	358415	0.533529	no
ARGININE	A101_1	CONTROL	C1	standard	fed	One	1.54415e+07	-0.0811356	no
ARGININE	A102_2	CONTROL	C2	standard	fed	One	1.43538e+07	-0.193399	no
ARGININE	A103_3	CONTROL	C3	standard	fed	One	1.59478e+07	-0.0315536	no
ARGININE	A104_4	CONTROL	C4	standard	fed	One	1.2513e+07	-0.404333	no
ARGININE	A105_5	CONTROL	C5	standard	fed	One	1.65257e+07	0.0231469	no
ARGININE	A106_6	CONTROL	C6	standard	fed	One	2.13147e+07	0.414252	no
ARGININE	A125_7	SELECTED	S1	standard	fed	One	9.20144e+06	-0.876773	no
ARGININE	A126_8	SELECTED	S2	standard	fed	One	1.99832e+07	0.315118	no
ARGININE	A127_9	SELECTED	S3	standard	fed	One	2.29523e+07	0.528013	no
ARGININE	A128_10	SELECTED	S4	standard	fed	One	1.51017e+07	-0.115339	no
ARGININE	A129_11	SELECTED	S5	standard	fed	One	1.48125e+07	-0.145056	no
ARGININE	A130_12	SELECTED	S6	standard	fed	One	1.77531e+07	0.133255	no
ARGININE	A301_25	CONTROL	C1	poor	fed	One	1.51163e+07	-0.113853	no
ARGININE	A302_26	CONTROL	C2	poor	fed	One	1.87681e+07	0.218708	no
ARGININE	A303_27	CONTROL	C3	poor	fed	One	1.65426e+07	0.0247193	no
ARGININE	A304_28	CONTROL	C4	poor	fed	One	1.80136e+07	0.155646	no
ARGININE	A305_29	CONTROL	C5	poor	fed	One	1.68317e+07	0.0513503	no
ARGININE	A306_30	CONTROL	C6	poor	fed	One	2.01537e+07	0.328178	no
ARGININE	A325_31	SELECTED	S1	poor	fed	One	1.19519e+07	-0.474831	no
ARGININE	A326_32	SELECTED	S2	poor	fed	One	1.66017e+07	0.0302043	no
ARGININE	A327_33	SELECTED	S3	poor	fed	One	1.55665e+07	-0.0687493	no
ARGININE	A328_34	SELECTED	S4	poor	fed	One	2.07304e+07	0.371532	no
ARGININE	A329_35	SELECTED	S5	poor	fed	One	1.78089e+07	0.138082	no
ARGININE	A330_36	SELECTED	S6	poor	fed	One	1.86472e+07	0.208774	no
ARGININE	AS101_13	CONTROL	C1	standard	starved	One	1.84372e+07	0.191364	no
ARGININE	AS102_14	CONTROL	C2	standard	starved	One	1.76475e+07	0.124088	no
ARGININE	AS103_15	CONTROL	C3	standard	starved	One	1.71202e+07	0.0774638	no
ARGININE	AS104_16	CONTROL	C4	standard	starved	One	1.51298e+07	-0.112474	no
ARGININE	AS105_17	CONTROL	C5	standard	starved	One	1.66397e+07	0.0337179	no
ARGININE	AS106_18	CONTROL	C6	standard	starved	One	1.65764e+07	0.0278579	no
ARGININE	AS125_19	SELECTED	S1	standard	starved	One	1.42298e+07	-0.206731	no
ARGININE	AS126_20	SELECTED	S2	standard	starved	One	1.47098e+07	-0.155748	no
ARGININE	AS127_21	SELECTED	S3	standard	starved	One	1.9781e+07	0.299486	no
ARGININE	AS128_22	SELECTED	S4	standard	starved	One	1.95141e+07	0.278612	no
ARGININE	AS129_23	SELECTED	S5	standard	starved	One	1.15945e+07	-0.5215	no
ARGININE	AS130_24	SELECTED	S6	standard	starved	One	1.38696e+07	-0.246136	no
ARGININE	AS301_37	CONTROL	C1	poor	starved	One	1.09773e+07	-0.605562	no
ARGININE	AS302_38	CONTROL	C2	poor	starved	One	1.81918e+07	0.170772	no
ARGININE	AS303_39	CONTROL	C3	poor	starved	One	1.52297e+07	-0.102361	no
ARGININE	AS304_40	CONTROL	C4	poor	starved	One	1.7377e+07	0.100349	no
ARGININE	AS305_41	CONTROL	C5	poor	starved	One	1.92713e+07	0.259365	no
ARGININE	AS306_42	CONTROL	C6	poor	starved	One	1.57741e+07	-0.0483876	no
ARGININE	AS325_43	SELECTED	S1	poor	starved	One	1.85719e+07	0.20255	no
ARGININE	AS326_44	SELECTED	S2	poor	starved	One	1.47817e+07	-0.14825	no
ARGININE	AS327_45	SELECTED	S3	poor	starved	One	1.4918e+07	-0.134146	no
ARGININE	AS328_46	SELECTED	S4	poor	starved	One	1.72057e+07	0.0851209	no
ARGININE	AS329_47	SELECTED	S5	poor	starved	One	2.11837e+07	0.404781	no
ARGININE	AS330_48	SELECTED	S6	poor	starved	One	1.24654e+07	-0.410189	no
ASPARAGINE	A201_1	CONTROL	C1	standard	fed	Two	16429.3	-0.150156	no
ASPARAGINE	A202_2	CONTROL	C2	standard	fed	Two	15665.1	-0.214187	no
ASPARAGINE	A203_3	CONTROL	C3	standard	fed	Two	18432.9	0.00452741	no
ASPARAGINE	A204_4	CONTROL	C4	standard	fed	Two	22855.1	0.293596	no
ASPARAGINE	A205_5	CONTROL	C5	standard	fed	Two	12018.4	-0.57041	no
ASPARAGINE	A206_6	CONTROL	C6	standard	fed	Two	12861.3	-0.479285	no
ASPARAGINE	A225_7	SELECTED	S1	standard	fed	Two	19671.5	0.0919501	no
ASPARAGINE	A226_8	SELECTED	S2	standard	fed	Two	17217.7	-0.087148	no
ASPARAGINE	A227_9	SELECTED	S3	standard	fed	Two	17202.4	-0.0883429	no
ASPARAGINE	A228_10	SELECTED	S4	standard	fed	Two	16425.3	-0.150485	no
ASPARAGINE	A229_11	SELECTED	S5	standard	fed	Two	20409.2	0.141437	no
ASPARAGINE	A230_12	SELECTED	S6	standard	fed	Two	25048.1	0.416761	no
ASPARAGINE	A401_25	CONTROL	C1	poor	fed	Two	17400.5	-0.0729507	no
ASPARAGINE	A402_26	CONTROL	C2	poor	fed	Two	16670.8	-0.130541	no
ASPARAGINE	A403_27	CONTROL	C3	poor	fed	Two	18790.3	0.0303408	no
ASPARAGINE	A404_28	CONTROL	C4	poor	fed	Two	12337.7	-0.53516	no
ASPARAGINE	A405_29	CONTROL	C5	poor	fed	Two	24857.3	0.406482	no
ASPARAGINE	A406_30	CONTROL	C6	poor	fed	Two	17977.4	-0.0291047	no
ASPARAGINE	A425_31	SELECTED	S1	poor	fed	Two	20337.5	0.136707	no
ASPARAGINE	A426_32	SELECTED	S2	poor	fed	Two	22457.3	0.269991	no
ASPARAGINE	A427_33	SELECTED	S3	poor	fed	Two	16400	-0.152557	no
ASPARAGINE	A428_34	SELECTED	S4	poor	fed	Two	21570.6	0.215836	no
ASPARAGINE	A429_35	SELECTED	S5	poor	fed	Two	31087.1	0.707112	no
ASPARAGINE	A430_36	SELECTED	S6	poor	fed	Two	28753	0.602191	no
ASPARAGINE	AS201_13	CONTROL	C1	standard	starved	Two	11994.4	-0.573089	no
ASPARAGINE	AS202_14	CONTROL	C2	standard	starved	Two	15935.4	-0.191184	no
ASPARAGINE	AS203_15	CONTROL	C3	standard	starved	Two	19435.1	0.0756967	no
ASPARAGINE	AS204_16	CONTROL	C4	standard	starved	Two	22816.8	0.291338	no
ASPARAGINE	AS205_17	CONTROL	C5	standard	starved	Two	12910.7	-0.474132	no
ASPARAGINE	AS206_18	CONTROL	C6	standard	starved	Two	17435.4	-0.0702579	no
ASPARAGINE	AS225_19	SELECTED	S1	standard	starved	Two	14586.7	-0.310066	no
ASPARAGINE	AS226_20	SELECTED	S2	standard	starved	Two	16180.9	-0.170636	no
ASPARAGINE	AS227_21	SELECTED	S3	standard	starved	Two	16329.9	-0.158312	no
ASPARAGINE	AS228_22	SELECTED	S4	standard	starved	Two	21748.2	0.226864	no
ASPARAGINE	AS229_23	SELECTED	S5	standard	starved	Two	16258	-0.164245	no
ASPARAGINE	AS230_24	SELECTED	S6	standard	starved	Two	18515.9	0.0105713	no
ASPARAGINE	AS401_37	CONTROL	C1	poor	starved	Two	17965	-0.0300357	no
ASPARAGINE	AS402_38	CONTROL	C2	poor	starved	Two	15621.9	-0.217892	no
ASPARAGINE	AS403_39	CONTROL	C3	poor	starved	Two	15821.6	-0.200824	no
ASPARAGINE	AS404_40	CONTROL	C4	poor	starved	Two	21685.6	0.222988	no
ASPARAGINE	AS405_41	CONTROL	C5	poor	starved	Two	17353.4	-0.0765966	no
ASPARAGINE	AS406_42	CONTROL	C6	poor	starved	Two	13942.1	-0.370815	no
ASPARAGINE	AS425_43	SELECTED	S1	poor	starved	Two	12975.4	-0.467417	no
ASPARAGINE	AS426_44	SELECTED	S2	poor	starved	Two	21887.2	0.235428	no
ASPARAGINE	AS427_45	SELECTED	S3	poor	starved	Two	19814.6	0.101693	no
ASPARAGINE	AS428_46	SELECTED	S4	poor	starved	Two	23793.9	0.34771	no
ASPARAGINE	AS429_47	SELECTED	S5	poor	starved	Two	29329.1	0.628859	no
ASPARAGINE	AS430_48	SELECTED	S6	poor	starved	Two	30415.4	0.677748	no
ASPARAGINE	A101_1	CONTROL	C1	standard	fed	One	20444.7	0.223234	no
ASPARAGINE	A102_2	CONTROL	C2	standard	fed	One	15444.8	-0.153274	no
ASPARAGINE	A103_3	CONTROL	C3	standard	fed	One	18363.3	0.079085	no
ASPARAGINE	A104_4	CONTROL	C4	standard	fed	One	17189.9	-0.00956229	no
ASPARAGINE	A105_5	CONTROL	C5	standard	fed	One	20984.3	0.258205	no
ASPARAGINE	A106_6	CONTROL	C6	standard	fed	One	16296.3	-0.0812274	no
ASPARAGINE	A125_7	SELECTED	S1	standard	fed	One	11226	-0.581591	no
ASPARAGINE	A126_8	SELECTED	S2	standard	fed	One	20570.5	0.231468	no
ASPARAGINE	A127_9	SELECTED	S3	standard	fed	One	20956.9	0.256454	no
ASPARAGINE	A128_10	SELECTED	S4	standard	fed	One	17194.1	-0.00922935	no
ASPARAGINE	A129_11	SELECTED	S5	standard	fed	One	19991.2	0.193118	no
ASPARAGINE	A130_12	SELECTED	S6	standard	fed	One	21681.4	0.302084	no
ASPARAGINE	A301_25	CONTROL	C1	poor	fed	One	8994.96	-0.879053	no
ASPARAGINE	A302_26	CONTROL	C2	poor	fed	One	16207.9	-0.0885318	no
ASPARAGINE	A303_27	CONTROL	C3	poor	fed	One	19387.4	0.151948	no
ASPARAGINE	A304_28	CONTROL	C4	poor	fed	One	16853.3	-0.0361116	no
ASPARAGINE	A305_29	CONTROL	C5	poor	fed	One	15743.6	-0.127552	no
ASPARAGINE	A306_30	CONTROL	C6	poor	fed	One	15027.3	-0.190064	no
ASPARAGINE	A325_31	SELECTED	S1	poor	fed	One	23926.9	0.434385	no
ASPARAGINE	A326_32	SELECTED	S2	poor	fed	One	24546.2	0.468694	no
ASPARAGINE	A327_33	SELECTED	S3	poor	fed	One	17136	-0.0137745	no
ASPARAGINE	A328_34	SELECTED	S4	poor	fed	One	22423.9	0.347289	no
ASPARAGINE	A329_35	SELECTED	S5	poor	fed	One	27260.9	0.609517	no
ASPARAGINE	A330_36	SELECTED	S6	poor	fed	One	18244.8	0.0703945	no
ASPARAGINE	AS101_13	CONTROL	C1	standard	starved	One	23099.4	0.387131	no
ASPARAGINE	AS102_14	CONTROL	C2	standard	starved	One	14893.5	-0.202071	no
ASPARAGINE	AS103_15	CONTROL	C3	standard	starved	One	22471.9	0.350159	no
ASPARAGINE	AS104_16	CONTROL	C4	standard	starved	One	22608.3	0.358284	no
ASPARAGINE	AS105_17	CONTROL	C5	standard	starved	One	19771.8	0.178306	no
ASPARAGINE	AS106_18	CONTROL	C6	standard	starved	One	15161	-0.178172	no
ASPARAGINE	AS125_19	SELECTED	S1	standard	starved	One	12837.8	-0.401484	no
ASPARAGINE	AS126_20	SELECTED	S2	standard	starved	One	16912.3	-0.0314209	no
ASPARAGINE	AS127_21	SELECTED	S3	standard	starved	One	17787.8	0.03634	no
ASPARAGINE	AS128_22	SELECTED	S4	standard	starved	One	20442.6	0.223097	no
ASPARAGINE	AS129_23	SELECTED	S5	standard	starved	One	16357.7	-0.0761778	no
ASPARAGINE	AS130_24	SELECTED	S6	standard	starved	One	12790.4	-0.406449	no
ASPARAGINE	AS301_37	CONTROL	C1	poor	starved	One	10785.7	-0.635304	no
ASPARAGINE	AS302_38	CONTROL	C2	poor	starved	One	14918	-0.199864	no
ASPARAGINE	AS303_39	CONTROL	C3	poor	starved	One	11997.7	-0.49234	no
ASPARAGINE	AS304_40	CONTROL	C4	poor	starved	One	16418.6	-0.0711925	no
ASPARAGINE	AS305_41	CONTROL	C5	poor	starved	One	15785.2	-0.124008	no
ASPARAGINE	AS306_42	CONTROL	C6	poor	starved	One	14410.6	-0.246324	no
ASPARAGINE	AS325_43	SELECTED	S1	poor	starved	One	20482	0.225682	no
ASPARAGINE	AS326_44	SELECTED	S2	poor	starved	One	19196.8	0.138679	no
ASPARAGINE	AS327_45	SELECTED	S3	poor	starved	One	13128.6	-0.371404	no
ASPARAGINE	AS328_46	SELECTED	S4	poor	starved	One	15125.4	-0.181327	no
ASPARAGINE	AS329_47	SELECTED	S5	poor	starved	One	27553.6	0.623854	no
ASPARAGINE	AS330_48	SELECTED	S6	poor	starved	One	13241.6	-0.359898	no
ASPARTATE	A201_1	CONTROL	C1	standard	fed	Two	19895.3	-0.691201	no
ASPARTATE	A202_2	CONTROL	C2	standard	fed	Two	27190.1	-0.442056	no
ASPARTATE	A203_3	CONTROL	C3	standard	fed	Two	119482	0.738633	no
ASPARTATE	A204_4	CONTROL	C4	standard	fed	Two	21652.2	-0.623706	no
ASPARTATE	A205_5	CONTROL	C5	standard	fed	Two	66265.6	0.268458	no
ASPARTATE	A206_6	CONTROL	C6	standard	fed	Two	14086.6	-0.966578	no
ASPARTATE	A225_7	SELECTED	S1	standard	fed	Two	61297.5	0.2063	no
ASPARTATE	A226_8	SELECTED	S2	standard	fed	Two	35643.5	-0.226134	no
ASPARTATE	A227_9	SELECTED	S3	standard	fed	Two	49964.6	0.043252	no
ASPARTATE	A228_10	SELECTED	S4	standard	fed	Two	30624.2	-0.347192	no
ASPARTATE	A229_11	SELECTED	S5	standard	fed	Two	39938.3	-0.135394	no
ASPARTATE	A230_12	SELECTED	S6	standard	fed	Two	24271.5	-0.532623	no
ASPARTATE	A401_25	CONTROL	C1	poor	fed	Two	56738.9	0.144662	no
ASPARTATE	A402_26	CONTROL	C2	poor	fed	Two	46634.6	-0.0117611	no
ASPARTATE	A403_27	CONTROL	C3	poor	fed	Two	71469.6	0.328757	no
ASPARTATE	A404_28	CONTROL	C4	poor	fed	Two	115925	0.714531	no
ASPARTATE	A405_29	CONTROL	C5	poor	fed	Two	40713.4	-0.120062	no
ASPARTATE	A406_30	CONTROL	C6	poor	fed	Two	28998.4	-0.390699	no
ASPARTATE	A425_31	SELECTED	S1	poor	fed	Two	70207.3	0.314543	no
ASPARTATE	A426_32	SELECTED	S2	poor	fed	Two	33774	-0.269107	no
ASPARTATE	A427_33	SELECTED	S3	poor	fed	Two	77154.8	0.389805	no
ASPARTATE	A428_34	SELECTED	S4	poor	fed	Two	93967.7	0.547042	no
ASPARTATE	A429_35	SELECTED	S5	poor	fed	Two	57376.9	0.15358	no
ASPARTATE	A430_36	SELECTED	S6	poor	fed	Two	79014.2	0.4088	no
ASPARTATE	AS201_13	CONTROL	C1	standard	starved	Two	19095.1	-0.723942	no
ASPARTATE	AS202_14	CONTROL	C2	standard	starved	Two	34163.7	-0.259956	no
ASPARTATE	AS203_15	CONTROL	C3	standard	starved	Two	15693.8	-0.880404	no
ASPARTATE	AS204_16	CONTROL	C4	standard	starved	Two	33663.4	-0.271723	no
ASPARTATE	AS205_17	CONTROL	C5	standard	starved	Two	92714.4	0.536332	no
ASPARTATE	AS206_18	CONTROL	C6	standard	starved	Two	33619.9	-0.272754	no
ASPARTATE	AS225_19	SELECTED	S1	standard	starved	Two	15670.7	-0.881579	no
ASPARTATE	AS226_20	SELECTED	S2	standard	starved	Two	21875	-0.61554	no
ASPARTATE	AS227_21	SELECTED	S3	standard	starved	Two	17829.1	-0.778658	no
ASPARTATE	AS228_22	SELECTED	S4	standard	starved	Two	36032	-0.21749	no
ASPARTATE	AS229_23	SELECTED	S5	standard	starved	Two	22383.9	-0.597197	no
ASPARTATE	AS230_24	SELECTED	S6	standard	starved	Two	43032.6	-0.0758757	no
ASPARTATE	AS401_37	CONTROL	C1	poor	starved	Two	61740	0.212037	no
ASPARTATE	AS402_38	CONTROL	C2	poor	starved	Two	30725.9	-0.344547	no
ASPARTATE	AS403_39	CONTROL	C3	poor	starved	Two	62048.9	0.216017	no
ASPARTATE	AS404_40	CONTROL	C4	poor	starved	Two	65526.9	0.259516	no
ASPARTATE	AS405_41	CONTROL	C5	poor	starved	Two	241979	1.30149	no
ASPARTATE	AS406_42	CONTROL	C6	poor	starved	Two	109009	0.665472	no
ASPARTATE	AS425_43	SELECTED	S1	poor	starved	Two	125896	0.780342	no
ASPARTATE	AS426_44	SELECTED	S2	poor	starved	Two	145055	0.893327	no
ASPARTATE	AS427_45	SELECTED	S3	poor	starved	Two	29947.4	-0.365016	no
ASPARTATE	AS428_46	SELECTED	S4	poor	starved	Two	124445	0.771096	no
ASPARTATE	AS429_47	SELECTED	S5	poor	starved	Two	95130.6	0.556852	no
ASPARTATE	AS430_48	SELECTED	S6	poor	starved	Two	99211.3	0.590352	no
ASPARTATE	A101_1	CONTROL	C1	standard	fed	One	28912.7	-0.819003	no
ASPARTATE	A102_2	CONTROL	C2	standard	fed	One	33881.7	-0.685407	no
ASPARTATE	A103_3	CONTROL	C3	standard	fed	One	36709.7	-0.617876	no
ASPARTATE	A104_4	CONTROL	C4	standard	fed	One	34976.3	-0.658622	no
ASPARTATE	A105_5	CONTROL	C5	standard	fed	One	34526.8	-0.669517	no
ASPARTATE	A106_6	CONTROL	C6	standard	fed	One	90552.7	0.142707	no
ASPARTATE	A125_7	SELECTED	S1	standard	fed	One	121500	0.390356	no
ASPARTATE	A126_8	SELECTED	S2	standard	fed	One	97836.5	0.207879	no
ASPARTATE	A127_9	SELECTED	S3	standard	fed	One	74154	-0.0255908	no
ASPARTATE	A128_10	SELECTED	S4	standard	fed	One	134245	0.474386	no
ASPARTATE	A129_11	SELECTED	S5	standard	fed	One	63339.1	-0.158386	no
ASPARTATE	A130_12	SELECTED	S6	standard	fed	One	46608.7	-0.416758	no
ASPARTATE	A301_25	CONTROL	C1	poor	fed	One	65298.2	-0.132725	no
ASPARTATE	A302_26	CONTROL	C2	poor	fed	One	65800.9	-0.126265	no
ASPARTATE	A303_27	CONTROL	C3	poor	fed	One	116302	0.353519	no
ASPARTATE	A304_28	CONTROL	C4	poor	fed	One	39109.5	-0.564532	no
ASPARTATE	A305_29	CONTROL	C5	poor	fed	One	189455	0.764574	no
ASPARTATE	A306_30	CONTROL	C6	poor	fed	One	81753.2	0.0565926	no
ASPARTATE	A325_31	SELECTED	S1	poor	fed	One	64957.5	-0.137133	no
ASPARTATE	A326_32	SELECTED	S2	poor	fed	One	117630	0.363087	no
ASPARTATE	A327_33	SELECTED	S3	poor	fed	One	114178	0.337993	no
ASPARTATE	A328_34	SELECTED	S4	poor	fed	One	176368	0.704277	no
ASPARTATE	A329_35	SELECTED	S5	poor	fed	One	146815	0.549784	no
ASPARTATE	A330_36	SELECTED	S6	poor	fed	One	52853.2	-0.310845	no
ASPARTATE	AS101_13	CONTROL	C1	standard	starved	One	43902.2	-0.467152	no
ASPARTATE	AS102_14	CONTROL	C2	standard	starved	One	54199.3	-0.289659	no
ASPARTATE	AS103_15	CONTROL	C3	standard	starved	One	42790.8	-0.488753	no
ASPARTATE	AS104_16	CONTROL	C4	standard	starved	One	44596.3	-0.453939	no
ASPARTATE	AS105_17	CONTROL	C5	standard	starved	One	57927.2	-0.233625	no
ASPARTATE	AS106_18	CONTROL	C6	standard	starved	One	29785.7	-0.793943	no
ASPARTATE	AS125_19	SELECTED	S1	standard	starved	One	48508.7	-0.383101	no
ASPARTATE	AS126_20	SELECTED	S2	standard	starved	One	65304.2	-0.132649	no
ASPARTATE	AS127_21	SELECTED	S3	standard	starved	One	51535.5	-0.332113	no
ASPARTATE	AS128_22	SELECTED	S4	standard	starved	One	61436.2	-0.184082	no
ASPARTATE	AS129_23	SELECTED	S5	standard	starved	One	36431.8	-0.624276	no
ASPARTATE	AS130_24	SELECTED	S6	standard	starved	One	119515	0.376477	no
ASPARTATE	AS301_37	CONTROL	C1	poor	starved	One	165471	0.650552	no
ASPARTATE	AS302_38	CONTROL	C2	poor	starved	One	64397	-0.144432	no
ASPARTATE	AS303_39	CONTROL	C3	poor	starved	One	212814	0.862514	no
ASPARTATE	AS304_40	CONTROL	C4	poor	starved	One	65774	-0.12661	no
ASPARTATE	AS305_41	CONTROL	C5	poor	starved	One	165151	0.648923	no
ASPARTATE	AS306_42	CONTROL	C6	poor	starved	One	177879	0.711462	no
ASPARTATE	AS325_43	SELECTED	S1	poor	starved	One	77948.3	0.0164457	no
ASPARTATE	AS326_44	SELECTED	S2	poor	starved	One	88396.3	0.122405	no
ASPARTATE	AS327_45	SELECTED	S3	poor	starved	One	182350	0.732375	no
ASPARTATE	AS328_46	SELECTED	S4	poor	starved	One	44534.7	-0.455103	no
ASPARTATE	AS329_47	SELECTED	S5	poor	starved	One	331730	1.23645	no
ASPARTATE	AS330_48	SELECTED	S6	poor	starved	One	181693	0.729334	no
BETA-ALANINE/SARCOSINE	A201_1	CONTROL	C1	standard	fed	Two	326378	0.327321	no
BETA-ALANINE/SARCOSINE	A202_2	CONTROL	C2	standard	fed	Two	199436	-0.234908	no
BETA-ALANINE/SARCOSINE	A203_3	CONTROL	C3	standard	fed	Two	423203	0.623864	no
BETA-ALANINE/SARCOSINE	A204_4	CONTROL	C4	standard	fed	Two	251864	0.031498	no
BETA-ALANINE/SARCOSINE	A205_5	CONTROL	C5	standard	fed	Two	284077	0.168875	no
BETA-ALANINE/SARCOSINE	A206_6	CONTROL	C6	standard	fed	Two	253605	0.039359	no
BETA-ALANINE/SARCOSINE	A225_7	SELECTED	S1	standard	fed	Two	348465	0.402064	no
BETA-ALANINE/SARCOSINE	A226_8	SELECTED	S2	standard	fed	Two	385389	0.517026	no
BETA-ALANINE/SARCOSINE	A227_9	SELECTED	S3	standard	fed	Two	313261	0.280499	no
BETA-ALANINE/SARCOSINE	A228_10	SELECTED	S4	standard	fed	Two	221619	-0.114529	no
BETA-ALANINE/SARCOSINE	A229_11	SELECTED	S5	standard	fed	Two	277911	0.143829	no
BETA-ALANINE/SARCOSINE	A230_12	SELECTED	S6	standard	fed	Two	282467	0.162391	no
BETA-ALANINE/SARCOSINE	A401_25	CONTROL	C1	poor	fed	Two	178000	-0.364703	no
BETA-ALANINE/SARCOSINE	A402_26	CONTROL	C2	poor	fed	Two	163185	-0.463891	no
BETA-ALANINE/SARCOSINE	A403_27	CONTROL	C3	poor	fed	Two	192388	-0.275977	no
BETA-ALANINE/SARCOSINE	A404_28	CONTROL	C4	poor	fed	Two	129099	-0.731337	no
BETA-ALANINE/SARCOSINE	A405_29	CONTROL	C5	poor	fed	Two	135956	-0.672267	no
BETA-ALANINE/SARCOSINE	A406_30	CONTROL	C6	poor	fed	Two	353569	0.418663	no
BETA-ALANINE/SARCOSINE	A425_31	SELECTED	S1	poor	fed	Two	294832	0.211293	no
BETA-ALANINE/SARCOSINE	A426_32	SELECTED	S2	poor	fed	Two	279220	0.149194	no
BETA-ALANINE/SARCOSINE	A427_33	SELECTED	S3	poor	fed	Two	346183	0.394566	no
BETA-ALANINE/SARCOSINE	A428_34	SELECTED	S4	poor	fed	Two	281180	0.157176	no
BETA-ALANINE/SARCOSINE	A429_35	SELECTED	S5	poor	fed	Two	516097	0.850374	no
BETA-ALANINE/SARCOSINE	A430_36	SELECTED	S6	poor	fed	Two	176589	-0.373788	no
BETA-ALANINE/SARCOSINE	AS201_13	CONTROL	C1	standard	starved	Two	298225	0.224354	no
BETA-ALANINE/SARCOSINE	AS202_14	CONTROL	C2	standard	starved	Two	260435	0.0696962	no
BETA-ALANINE/SARCOSINE	AS203_15	CONTROL	C3	standard	starved	Two	209271	-0.179963	no
BETA-ALANINE/SARCOSINE	AS204_16	CONTROL	C4	standard	starved	Two	216398	-0.141738	no
BETA-ALANINE/SARCOSINE	AS205_17	CONTROL	C5	standard	starved	Two	170311	-0.415103	no
BETA-ALANINE/SARCOSINE	AS206_18	CONTROL	C6	standard	starved	Two	145791	-0.592546	no
BETA-ALANINE/SARCOSINE	AS225_19	SELECTED	S1	standard	starved	Two	299721	0.230065	no
BETA-ALANINE/SARCOSINE	AS226_20	SELECTED	S2	standard	starved	Two	261547	0.0745565	no
BETA-ALANINE/SARCOSINE	AS227_21	SELECTED	S3	standard	starved	Two	260814	0.0713563	no
BETA-ALANINE/SARCOSINE	AS228_22	SELECTED	S4	standard	starved	Two	389823	0.530084	no
BETA-ALANINE/SARCOSINE	AS229_23	SELECTED	S5	standard	starved	Two	265787	0.0929141	no
BETA-ALANINE/SARCOSINE	AS230_24	SELECTED	S6	standard	starved	Two	262027	0.0766493	no
BETA-ALANINE/SARCOSINE	AS401_37	CONTROL	C1	poor	starved	Two	159613	-0.489156	no
BETA-ALANINE/SARCOSINE	AS402_38	CONTROL	C2	poor	starved	Two	131965	-0.706279	no
BETA-ALANINE/SARCOSINE	AS403_39	CONTROL	C3	poor	starved	Two	350504	0.408726	no
BETA-ALANINE/SARCOSINE	AS404_40	CONTROL	C4	poor	starved	Two	259998	0.067776	no
BETA-ALANINE/SARCOSINE	AS405_41	CONTROL	C5	poor	starved	Two	205315	-0.201749	no
BETA-ALANINE/SARCOSINE	AS406_42	CONTROL	C6	poor	starved	Two	156597	-0.510931	no
BETA-ALANINE/SARCOSINE	AS425_43	SELECTED	S1	poor	starved	Two	130282	-0.720923	no
BETA-ALANINE/SARCOSINE	AS426_44	SELECTED	S2	poor	starved	Two	282318	0.161787	no
BETA-ALANINE/SARCOSINE	AS427_45	SELECTED	S3	poor	starved	Two	261675	0.075115	no
BETA-ALANINE/SARCOSINE	AS428_46	SELECTED	S4	poor	starved	Two	226719	-0.0885568	no
BETA-ALANINE/SARCOSINE	AS429_47	SELECTED	S5	poor	starved	Two	222284	-0.111104	no
BETA-ALANINE/SARCOSINE	AS430_48	SELECTED	S6	poor	starved	Two	356591	0.428378	no
BETA-ALANINE/SARCOSINE	A101_1	CONTROL	C1	standard	fed	One	407902	0.094752	no
BETA-ALANINE/SARCOSINE	A102_2	CONTROL	C2	standard	fed	One	303993	-0.239938	no
BETA-ALANINE/SARCOSINE	A103_3	CONTROL	C3	standard	fed	One	406863	0.0918498	no
BETA-ALANINE/SARCOSINE	A104_4	CONTROL	C4	standard	fed	One	464062	0.241584	no
BETA-ALANINE/SARCOSINE	A105_5	CONTROL	C5	standard	fed	One	404208	0.0843972	no
BETA-ALANINE/SARCOSINE	A106_6	CONTROL	C6	standard	fed	One	435188	0.168459	no
BETA-ALANINE/SARCOSINE	A125_7	SELECTED	S1	standard	fed	One	376945	0.00490695	no
BETA-ALANINE/SARCOSINE	A126_8	SELECTED	S2	standard	fed	One	477663	0.274467	no
BETA-ALANINE/SARCOSINE	A127_9	SELECTED	S3	standard	fed	One	745572	0.781296	no
BETA-ALANINE/SARCOSINE	A128_10	SELECTED	S4	standard	fed	One	416473	0.118424	no
BETA-ALANINE/SARCOSINE	A129_11	SELECTED	S5	standard	fed	One	351281	-0.0753581	no
BETA-ALANINE/SARCOSINE	A130_12	SELECTED	S6	standard	fed	One	386616	0.0337442	no
BETA-ALANINE/SARCOSINE	A301_25	CONTROL	C1	poor	fed	One	394333	0.0562425	no
BETA-ALANINE/SARCOSINE	A302_26	CONTROL	C2	poor	fed	One	491262	0.306423	no
BETA-ALANINE/SARCOSINE	A303_27	CONTROL	C3	poor	fed	One	410668	0.102446	no
BETA-ALANINE/SARCOSINE	A304_28	CONTROL	C4	poor	fed	One	405557	0.0881896	no
BETA-ALANINE/SARCOSINE	A305_29	CONTROL	C5	poor	fed	One	439916	0.18076	no
BETA-ALANINE/SARCOSINE	A306_30	CONTROL	C6	poor	fed	One	441437	0.184687	no
BETA-ALANINE/SARCOSINE	A325_31	SELECTED	S1	poor	fed	One	386493	0.0333826	no
BETA-ALANINE/SARCOSINE	A326_32	SELECTED	S2	poor	fed	One	524043	0.379953	no
BETA-ALANINE/SARCOSINE	A327_33	SELECTED	S3	poor	fed	One	355878	-0.0605569	no
BETA-ALANINE/SARCOSINE	A328_34	SELECTED	S4	poor	fed	One	575649	0.486869	no
BETA-ALANINE/SARCOSINE	A329_35	SELECTED	S5	poor	fed	One	637893	0.603741	no
BETA-ALANINE/SARCOSINE	A330_36	SELECTED	S6	poor	fed	One	488141	0.299169	no
BETA-ALANINE/SARCOSINE	AS101_13	CONTROL	C1	standard	starved	One	536454	0.406598	no
BETA-ALANINE/SARCOSINE	AS102_14	CONTROL	C2	standard	starved	One	170388	-0.898934	no
BETA-ALANINE/SARCOSINE	AS103_15	CONTROL	C3	standard	starved	One	232700	-0.544154	no
BETA-ALANINE/SARCOSINE	AS104_16	CONTROL	C4	standard	starved	One	308118	-0.224594	no
BETA-ALANINE/SARCOSINE	AS105_17	CONTROL	C5	standard	starved	One	269981	-0.375003	no
BETA-ALANINE/SARCOSINE	AS106_18	CONTROL	C6	standard	starved	One	241867	-0.500174	no
BETA-ALANINE/SARCOSINE	AS125_19	SELECTED	S1	standard	starved	One	418232	0.123222	no
BETA-ALANINE/SARCOSINE	AS126_20	SELECTED	S2	standard	starved	One	330153	-0.145966	no
BETA-ALANINE/SARCOSINE	AS127_21	SELECTED	S3	standard	starved	One	499160	0.324577	no
BETA-ALANINE/SARCOSINE	AS128_22	SELECTED	S4	standard	starved	One	385216	0.0296143	no
BETA-ALANINE/SARCOSINE	AS129_23	SELECTED	S5	standard	starved	One	213275	-0.643379	no
BETA-ALANINE/SARCOSINE	AS130_24	SELECTED	S6	standard	starved	One	303207	-0.242885	no
BETA-ALANINE/SARCOSINE	AS301_37	CONTROL	C1	poor	starved	One	174548	-0.871477	no
BETA-ALANINE/SARCOSINE	AS302_38	CONTROL	C2	poor	starved	One	291797	-0.286547	no
BETA-ALANINE/SARCOSINE	AS303_39	CONTROL	C3	poor	starved	One	441929	0.185957	no
BETA-ALANINE/SARCOSINE	AS304_40	CONTROL	C4	poor	starved	One	446213	0.196939	no
BETA-ALANINE/SARCOSINE	AS305_41	CONTROL	C5	poor	starved	One	399121	0.0699788	no
BETA-ALANINE/SARCOSINE	AS306_42	CONTROL	C6	poor	starved	One	319455	-0.183465	no
BETA-ALANINE/SARCOSINE	AS325_43	SELECTED	S1	poor	starved	One	591915	0.518588	no
BETA-ALANINE/SARCOSINE	AS326_44	SELECTED	S2	poor	starved	One	199748	-0.717967	no
BETA-ALANINE/SARCOSINE	AS327_45	SELECTED	S3	poor	starved	One	471279	0.25915	no
BETA-ALANINE/SARCOSINE	AS328_46	SELECTED	S4	poor	starved	One	300522	-0.253008	no
BETA-ALANINE/SARCOSINE	AS329_47	SELECTED	S5	poor	starved	One	502338	0.331802	no
BETA-ALANINE/SARCOSINE	AS330_48	SELECTED	S6	poor	starved	One	186062	-0.798764	no
BIOTIN	A201_1	CONTROL	C1	standard	fed	Two	78940.8	0.493933	no
BIOTIN	A202_2	CONTROL	C2	standard	fed	Two	57327.7	0.175485	no
BIOTIN	A203_3	CONTROL	C3	standard	fed	Two	61888.5	0.251686	no
BIOTIN	A204_4	CONTROL	C4	standard	fed	Two	23092.6	-0.729617	no
BIOTIN	A205_5	CONTROL	C5	standard	fed	Two	61382.9	0.24352	no
BIOTIN	A206_6	CONTROL	C6	standard	fed	Two	33576.5	-0.357019	no
BIOTIN	A225_7	SELECTED	S1	standard	fed	Two	48534.1	0.00973108	no
BIOTIN	A226_8	SELECTED	S2	standard	fed	Two	31335.4	-0.425781	no
BIOTIN	A227_9	SELECTED	S3	standard	fed	Two	87024.6	0.590979	no
BIOTIN	A228_10	SELECTED	S4	standard	fed	Two	32881.1	-0.377853	no
BIOTIN	A229_11	SELECTED	S5	standard	fed	Two	77875.8	0.480413	no
BIOTIN	A230_12	SELECTED	S6	standard	fed	Two	27057.1	-0.571908	no
BIOTIN	A401_25	CONTROL	C1	poor	fed	Two	36086.4	-0.285259	no
BIOTIN	A402_26	CONTROL	C2	poor	fed	Two	79224.8	0.497509	no
BIOTIN	A403_27	CONTROL	C3	poor	fed	Two	82751.6	0.540863	no
BIOTIN	A404_28	CONTROL	C4	poor	fed	Two	37708.6	-0.241488	no
BIOTIN	A405_29	CONTROL	C5	poor	fed	Two	45853	-0.0468332	no
BIOTIN	A406_30	CONTROL	C6	poor	fed	Two	65389.6	0.306462	no
BIOTIN	A425_31	SELECTED	S1	poor	fed	Two	27284.6	-0.563572	no
BIOTIN	A426_32	SELECTED	S2	poor	fed	Two	33288.2	-0.365604	no
BIOTIN	A427_33	SELECTED	S3	poor	fed	Two	19442.4	-0.900886	no
BIOTIN	A428_34	SELECTED	S4	poor	fed	Two	68548.3	0.353421	no
BIOTIN	A429_35	SELECTED	S5	poor	fed	Two	71942.5	0.401528	no
BIOTIN	A430_36	SELECTED	S6	poor	fed	Two	38383.5	-0.223831	no
BIOTIN	AS201_13	CONTROL	C1	standard	starved	Two	55394.6	0.141342	no
BIOTIN	AS202_14	CONTROL	C2	standard	starved	Two	61463.2	0.244821	no
BIOTIN	AS203_15	CONTROL	C3	standard	starved	Two	37964.1	-0.234766	no
BIOTIN	AS204_16	CONTROL	C4	standard	starved	Two	36692.5	-0.268679	no
BIOTIN	AS205_17	CONTROL	C5	standard	starved	Two	54386.8	0.123064	no
BIOTIN	AS206_18	CONTROL	C6	standard	starved	Two	30341.8	-0.457855	no
BIOTIN	AS225_19	SELECTED	S1	standard	starved	Two	23329.1	-0.719476	no
BIOTIN	AS226_20	SELECTED	S2	standard	starved	Two	51871.8	0.0759359	no
BIOTIN	AS227_21	SELECTED	S3	standard	starved	Two	30310.8	-0.458871	no
BIOTIN	AS228_22	SELECTED	S4	standard	starved	Two	59283.1	0.208872	no
BIOTIN	AS229_23	SELECTED	S5	standard	starved	Two	46030.5	-0.0429874	no
BIOTIN	AS230_24	SELECTED	S6	standard	starved	Two	39419.2	-0.197327	no
BIOTIN	AS401_37	CONTROL	C1	poor	starved	Two	57853.3	0.184571	no
BIOTIN	AS402_38	CONTROL	C2	poor	starved	Two	148061	1.11998	no
BIOTIN	AS403_39	CONTROL	C3	poor	starved	Two	80066.4	0.508027	no
BIOTIN	AS404_40	CONTROL	C4	poor	starved	Two	52277.6	0.083692	no
BIOTIN	AS405_41	CONTROL	C5	poor	starved	Two	78455.2	0.487791	no
BIOTIN	AS406_42	CONTROL	C6	poor	starved	Two	92510.6	0.651831	no
BIOTIN	AS425_43	SELECTED	S1	poor	starved	Two	46766.4	-0.0271993	no
BIOTIN	AS426_44	SELECTED	S2	poor	starved	Two	38217.7	-0.22814	no
BIOTIN	AS427_45	SELECTED	S3	poor	starved	Two	53556.1	0.107744	no
BIOTIN	AS428_46	SELECTED	S4	poor	starved	Two	22421.9	-0.758955	no
BIOTIN	AS429_47	SELECTED	S5	poor	starved	Two	70368.3	0.379505	no
BIOTIN	AS430_48	SELECTED	S6	poor	starved	Two	40159.8	-0.178799	no
BIOTIN	A101_1	CONTROL	C1	standard	fed	One	98177.1	0.554537	no
BIOTIN	A102_2	CONTROL	C2	standard	fed	One	74467.5	0.299228	no
BIOTIN	A103_3	CONTROL	C3	standard	fed	One	32009.6	-0.480643	no
BIOTIN	A104_4	CONTROL	C4	standard	fed	One	62976.8	0.144426	no
BIOTIN	A105_5	CONTROL	C5	standard	fed	One	59108.1	0.0858671	no
BIOTIN	A106_6	CONTROL	C6	standard	fed	One	42831.1	-0.211647	no
BIOTIN	A125_7	SELECTED	S1	standard	fed	One	31714.9	-0.489184	no
BIOTIN	A126_8	SELECTED	S2	standard	fed	One	46294.9	-0.139816	no
BIOTIN	A127_9	SELECTED	S3	standard	fed	One	78115.4	0.343402	no
BIOTIN	A128_10	SELECTED	S4	standard	fed	One	50284.5	-0.0634618	no
BIOTIN	A129_11	SELECTED	S5	standard	fed	One	38526.3	-0.309483	no
BIOTIN	A130_12	SELECTED	S6	standard	fed	One	34002.6	-0.424852	no
BIOTIN	A301_25	CONTROL	C1	poor	fed	One	57729.3	0.0640667	no
BIOTIN	A302_26	CONTROL	C2	poor	fed	One	71786.2	0.265357	no
BIOTIN	A303_27	CONTROL	C3	poor	fed	One	65767.9	0.184481	no
BIOTIN	A304_28	CONTROL	C4	poor	fed	One	86601.5	0.438658	no
BIOTIN	A305_29	CONTROL	C5	poor	fed	One	44555.6	-0.175186	no
BIOTIN	A306_30	CONTROL	C6	poor	fed	One	61561.8	0.123437	no
BIOTIN	A325_31	SELECTED	S1	poor	fed	One	42935.7	-0.209392	no
BIOTIN	A326_32	SELECTED	S2	poor	fed	One	96951.6	0.542935	no
BIOTIN	A327_33	SELECTED	S3	poor	fed	One	20719.6	-0.882392	no
BIOTIN	A328_34	SELECTED	S4	poor	fed	One	33435.4	-0.44039	no
BIOTIN	A329_35	SELECTED	S5	poor	fed	One	88552	0.459231	no
BIOTIN	A330_36	SELECTED	S6	poor	fed	One	71550	0.262314	no
BIOTIN	AS101_13	CONTROL	C1	standard	starved	One	72915.5	0.279775	no
BIOTIN	AS102_14	CONTROL	C2	standard	starved	One	80707	0.373548	no
BIOTIN	AS103_15	CONTROL	C3	standard	starved	One	128815	0.805407	no
BIOTIN	AS104_16	CONTROL	C4	standard	starved	One	117915	0.723741	no
BIOTIN	AS105_17	CONTROL	C5	standard	starved	One	23476.5	-0.767009	no
BIOTIN	AS106_18	CONTROL	C6	standard	starved	One	16608	-1.0867	no
BIOTIN	AS125_19	SELECTED	S1	standard	starved	One	27364.4	-0.625464	no
BIOTIN	AS126_20	SELECTED	S2	standard	starved	One	60238.8	0.103371	no
BIOTIN	AS127_21	SELECTED	S3	standard	starved	One	111319	0.670575	no
BIOTIN	AS128_22	SELECTED	S4	standard	starved	One	103607	0.604258	no
BIOTIN	AS129_23	SELECTED	S5	standard	starved	One	60345.6	0.105006	no
BIOTIN	AS130_24	SELECTED	S6	standard	starved	One	22157.6	-0.820414	no
BIOTIN	AS301_37	CONTROL	C1	poor	starved	One	39997.3	-0.274872	no
BIOTIN	AS302_38	CONTROL	C2	poor	starved	One	91292.3	0.487381	no
BIOTIN	AS303_39	CONTROL	C3	poor	starved	One	75327.2	0.30983	no
BIOTIN	AS304_40	CONTROL	C4	poor	starved	One	61817.6	0.127266	no
BIOTIN	AS305_41	CONTROL	C5	poor	starved	One	63964.2	0.158796	no
BIOTIN	AS306_42	CONTROL	C6	poor	starved	One	76373	0.322566	no
BIOTIN	AS325_43	SELECTED	S1	poor	starved	One	39499.9	-0.28643	no
BIOTIN	AS326_44	SELECTED	S2	poor	starved	One	33687.1	-0.433462	no
BIOTIN	AS327_45	SELECTED	S3	poor	starved	One	17778	-1.02382	no
BIOTIN	AS328_46	SELECTED	S4	poor	starved	One	43711.1	-0.19286	no
BIOTIN	AS329_47	SELECTED	S5	poor	starved	One	71750.3	0.264895	no
BIOTIN	AS330_48	SELECTED	S6	poor	starved	One	69324.2	0.233123	no
BUTYRYLCARNITINE	A201_1	CONTROL	C1	standard	fed	Two	986879	-0.539575	no
BUTYRYLCARNITINE	A202_2	CONTROL	C2	standard	fed	Two	1.36489e+06	-0.191097	no
BUTYRYLCARNITINE	A203_3	CONTROL	C3	standard	fed	Two	967268	-0.561145	no
BUTYRYLCARNITINE	A204_4	CONTROL	C4	standard	fed	Two	698910	-0.910348	no
BUTYRYLCARNITINE	A205_5	CONTROL	C5	standard	fed	Two	1.11582e+06	-0.407615	no
BUTYRYLCARNITINE	A206_6	CONTROL	C6	standard	fed	Two	1.11015e+06	-0.413087	no
BUTYRYLCARNITINE	A225_7	SELECTED	S1	standard	fed	Two	1.28948e+06	-0.252171	no
BUTYRYLCARNITINE	A226_8	SELECTED	S2	standard	fed	Two	1.16693e+06	-0.359486	no
BUTYRYLCARNITINE	A227_9	SELECTED	S3	standard	fed	Two	1.14306e+06	-0.381692	no
BUTYRYLCARNITINE	A228_10	SELECTED	S4	standard	fed	Two	1.40853e+06	-0.157272	no
BUTYRYLCARNITINE	A229_11	SELECTED	S5	standard	fed	Two	1.30617e+06	-0.238349	no
BUTYRYLCARNITINE	A230_12	SELECTED	S6	standard	fed	Two	1.38366e+06	-0.176415	no
BUTYRYLCARNITINE	A401_25	CONTROL	C1	poor	fed	Two	1.20533e+06	-0.324692	no
BUTYRYLCARNITINE	A402_26	CONTROL	C2	poor	fed	Two	1.6628e+06	0.0210708	no
BUTYRYLCARNITINE	A403_27	CONTROL	C3	poor	fed	Two	1.36661e+06	-0.18974	no
BUTYRYLCARNITINE	A404_28	CONTROL	C4	poor	fed	Two	1.10452e+06	-0.418547	no
BUTYRYLCARNITINE	A405_29	CONTROL	C5	poor	fed	Two	929151	-0.604349	no
BUTYRYLCARNITINE	A406_30	CONTROL	C6	poor	fed	Two	1.43811e+06	-0.134936	no
BUTYRYLCARNITINE	A425_31	SELECTED	S1	poor	fed	Two	1.55667e+06	-0.049806	no
BUTYRYLCARNITINE	A426_32	SELECTED	S2	poor	fed	Two	1.42543e+06	-0.144457	no
BUTYRYLCARNITINE	A427_33	SELECTED	S3	poor	fed	Two	1.10307e+06	-0.419959	no
BUTYRYLCARNITINE	A428_34	SELECTED	S4	poor	fed	Two	1.19745e+06	-0.331744	no
BUTYRYLCARNITINE	A429_35	SELECTED	S5	poor	fed	Two	1.26924e+06	-0.269171	no
BUTYRYLCARNITINE	A430_36	SELECTED	S6	poor	fed	Two	1.38485e+06	-0.17549	no
BUTYRYLCARNITINE	AS201_13	CONTROL	C1	standard	starved	Two	1.63453e+06	0.00264157	no
BUTYRYLCARNITINE	AS202_14	CONTROL	C2	standard	starved	Two	2.19631e+06	0.320109	no
BUTYRYLCARNITINE	AS203_15	CONTROL	C3	standard	starved	Two	2.19669e+06	0.320294	no
BUTYRYLCARNITINE	AS204_16	CONTROL	C4	standard	starved	Two	1.24458e+06	-0.290258	no
BUTYRYLCARNITINE	AS205_17	CONTROL	C5	standard	starved	Two	2.38868e+06	0.410338	no
BUTYRYLCARNITINE	AS206_18	CONTROL	C6	standard	starved	Two	1.77888e+06	0.0935877	no
BUTYRYLCARNITINE	AS225_19	SELECTED	S1	standard	starved	Two	2.33697e+06	0.386818	no
BUTYRYLCARNITINE	AS226_20	SELECTED	S2	standard	starved	Two	2.2308e+06	0.336855	no
BUTYRYLCARNITINE	AS227_21	SELECTED	S3	standard	starved	Two	2.20124e+06	0.322521	no
BUTYRYLCARNITINE	AS228_22	SELECTED	S4	standard	starved	Two	1.98689e+06	0.212427	no
BUTYRYLCARNITINE	AS229_23	SELECTED	S5	standard	starved	Two	1.88191e+06	0.154087	no
BUTYRYLCARNITINE	AS230_24	SELECTED	S6	standard	starved	Two	3.13227e+06	0.70158	no
BUTYRYLCARNITINE	AS401_37	CONTROL	C1	poor	starved	Two	2.08279e+06	0.263077	no
BUTYRYLCARNITINE	AS402_38	CONTROL	C2	poor	starved	Two	2.43048e+06	0.428979	no
BUTYRYLCARNITINE	AS403_39	CONTROL	C3	poor	starved	Two	2.21773e+06	0.330542	no
BUTYRYLCARNITINE	AS404_40	CONTROL	C4	poor	starved	Two	1.77761e+06	0.0928205	no
BUTYRYLCARNITINE	AS405_41	CONTROL	C5	poor	starved	Two	2.05287e+06	0.247532	no
BUTYRYLCARNITINE	AS406_42	CONTROL	C6	poor	starved	Two	1.81975e+06	0.117996	no
BUTYRYLCARNITINE	AS425_43	SELECTED	S1	poor	starved	Two	2.07232e+06	0.257666	no
BUTYRYLCARNITINE	AS426_44	SELECTED	S2	poor	starved	Two	2.13429e+06	0.289327	no
BUTYRYLCARNITINE	AS427_45	SELECTED	S3	poor	starved	Two	2.50347e+06	0.460779	no
BUTYRYLCARNITINE	AS428_46	SELECTED	S4	poor	starved	Two	2.00349e+06	0.221366	no
BUTYRYLCARNITINE	AS429_47	SELECTED	S5	poor	starved	Two	3.1245e+06	0.69891	no
BUTYRYLCARNITINE	AS430_48	SELECTED	S6	poor	starved	Two	5.21829e+06	1.25008	no
BUTYRYLCARNITINE	A101_1	CONTROL	C1	standard	fed	One	788087	-0.714097	no
BUTYRYLCARNITINE	A102_2	CONTROL	C2	standard	fed	One	1.01659e+06	-0.438293	no
BUTYRYLCARNITINE	A103_3	CONTROL	C3	standard	fed	One	1.32417e+06	-0.151958	no
BUTYRYLCARNITINE	A104_4	CONTROL	C4	standard	fed	One	658067	-0.909411	no
BUTYRYLCARNITINE	A105_5	CONTROL	C5	standard	fed	One	916606	-0.55045	no
BUTYRYLCARNITINE	A106_6	CONTROL	C6	standard	fed	One	1.80527e+06	0.18377	no
BUTYRYLCARNITINE	A125_7	SELECTED	S1	standard	fed	One	1.03654e+06	-0.417244	no
BUTYRYLCARNITINE	A126_8	SELECTED	S2	standard	fed	One	1.4566e+06	-0.0487049	no
BUTYRYLCARNITINE	A127_9	SELECTED	S3	standard	fed	One	1.42408e+06	-0.0731594	no
BUTYRYLCARNITINE	A128_10	SELECTED	S4	standard	fed	One	958735	-0.50177	no
BUTYRYLCARNITINE	A129_11	SELECTED	S5	standard	fed	One	1.43285e+06	-0.0665071	no
BUTYRYLCARNITINE	A130_12	SELECTED	S6	standard	fed	One	1.70999e+06	0.125037	no
BUTYRYLCARNITINE	A301_25	CONTROL	C1	poor	fed	One	2.00235e+06	0.296012	no
BUTYRYLCARNITINE	A302_26	CONTROL	C2	poor	fed	One	1.26716e+06	-0.199627	no
BUTYRYLCARNITINE	A303_27	CONTROL	C3	poor	fed	One	1.23154e+06	-0.230515	no
BUTYRYLCARNITINE	A304_28	CONTROL	C4	poor	fed	One	783321	-0.720668	no
BUTYRYLCARNITINE	A305_29	CONTROL	C5	poor	fed	One	1.19013e+06	-0.26757	no
BUTYRYLCARNITINE	A306_30	CONTROL	C6	poor	fed	One	1.26449e+06	-0.201916	no
BUTYRYLCARNITINE	A325_31	SELECTED	S1	poor	fed	One	1.25648e+06	-0.208795	no
BUTYRYLCARNITINE	A326_32	SELECTED	S2	poor	fed	One	1.09558e+06	-0.357235	no
BUTYRYLCARNITINE	A327_33	SELECTED	S3	poor	fed	One	903723	-0.565783	no
BUTYRYLCARNITINE	A328_34	SELECTED	S4	poor	fed	One	1.0666e+06	-0.386282	no
BUTYRYLCARNITINE	A329_35	SELECTED	S5	poor	fed	One	1.29488e+06	-0.176184	no
BUTYRYLCARNITINE	A330_36	SELECTED	S6	poor	fed	One	1.11706e+06	-0.336209	no
BUTYRYLCARNITINE	AS101_13	CONTROL	C1	standard	starved	One	1.78031e+06	0.16869	no
BUTYRYLCARNITINE	AS102_14	CONTROL	C2	standard	starved	One	2.0623e+06	0.327965	no
BUTYRYLCARNITINE	AS103_15	CONTROL	C3	standard	starved	One	3.00442e+06	0.735559	no
BUTYRYLCARNITINE	AS104_16	CONTROL	C4	standard	starved	One	1.42155e+06	-0.075089	no
BUTYRYLCARNITINE	AS105_17	CONTROL	C5	standard	starved	One	2.43442e+06	0.507664	no
BUTYRYLCARNITINE	AS106_18	CONTROL	C6	standard	starved	One	1.92045e+06	0.250773	no
BUTYRYLCARNITINE	AS125_19	SELECTED	S1	standard	starved	One	2.0887e+06	0.341747	no
BUTYRYLCARNITINE	AS126_20	SELECTED	S2	standard	starved	One	2.38038e+06	0.483349	no
BUTYRYLCARNITINE	AS127_21	SELECTED	S3	standard	starved	One	1.98204e+06	0.284969	no
BUTYRYLCARNITINE	AS128_22	SELECTED	S4	standard	starved	One	1.85794e+06	0.214925	no
BUTYRYLCARNITINE	AS129_23	SELECTED	S5	standard	starved	One	1.60507e+06	0.0564413	no
BUTYRYLCARNITINE	AS130_24	SELECTED	S6	standard	starved	One	2.24737e+06	0.421062	no
BUTYRYLCARNITINE	AS301_37	CONTROL	C1	poor	starved	One	2.03592e+06	0.314018	no
BUTYRYLCARNITINE	AS302_38	CONTROL	C2	poor	starved	One	2.41146e+06	0.497401	no
BUTYRYLCARNITINE	AS303_39	CONTROL	C3	poor	starved	One	2.31865e+06	0.454884	no
BUTYRYLCARNITINE	AS304_40	CONTROL	C4	poor	starved	One	1.34519e+06	-0.134895	no
BUTYRYLCARNITINE	AS305_41	CONTROL	C5	poor	starved	One	2.33342e+06	0.461765	no
BUTYRYLCARNITINE	AS306_42	CONTROL	C6	poor	starved	One	1.69672e+06	0.116598	no
BUTYRYLCARNITINE	AS325_43	SELECTED	S1	poor	starved	One	1.82706e+06	0.196766	no
BUTYRYLCARNITINE	AS326_44	SELECTED	S2	poor	starved	One	2.04441e+06	0.318528	no
BUTYRYLCARNITINE	AS327_45	SELECTED	S3	poor	starved	One	1.73792e+06	0.142584	no
BUTYRYLCARNITINE	AS328_46	SELECTED	S4	poor	starved	One	1.0185e+06	-0.436265	no
BUTYRYLCARNITINE	AS329_47	SELECTED	S5	poor	starved	One	2.69945e+06	0.61961	no
BUTYRYLCARNITINE	AS330_48	SELECTED	S6	poor	starved	One	2.77243e+06	0.648508	no
CADAVERINE	A201_1	CONTROL	C1	standard	fed	Two	14785.5	0.0484293	no
CADAVERINE	A202_2	CONTROL	C2	standard	fed	Two	11283.1	-0.231822	no
CADAVERINE	A203_3	CONTROL	C3	standard	fed	Two	8408.23	-0.536696	no
CADAVERINE	A204_4	CONTROL	C4	standard	fed	Two	17656.9	0.232411	no
CADAVERINE	A205_5	CONTROL	C5	standard	fed	Two	9747.69	-0.383459	no
CADAVERINE	A206_6	CONTROL	C6	standard	fed	Two	7565.02	-0.646247	no
CADAVERINE	A225_7	SELECTED	S1	standard	fed	Two	6996.88	-0.727179	no
CADAVERINE	A226_8	SELECTED	S2	standard	fed	Two	9874.6	-0.370049	no
CADAVERINE	A227_9	SELECTED	S3	standard	fed	Two	9893.07	-0.368112	no
CADAVERINE	A228_10	SELECTED	S4	standard	fed	Two	18584	0.285463	no
CADAVERINE	A229_11	SELECTED	S5	standard	fed	Two	8917.48	-0.475739	no
CADAVERINE	A230_12	SELECTED	S6	standard	fed	Two	16292.3	0.149029	no
CADAVERINE	A401_25	CONTROL	C1	poor	fed	Two	21726.4	0.44742	no
CADAVERINE	A402_26	CONTROL	C2	poor	fed	Two	29516.3	0.765063	no
CADAVERINE	A403_27	CONTROL	C3	poor	fed	Two	24755.7	0.582729	no
CADAVERINE	A404_28	CONTROL	C4	poor	fed	Two	17633.1	0.231018	no
CADAVERINE	A405_29	CONTROL	C5	poor	fed	Two	38597.4	1.04314	no
CADAVERINE	A406_30	CONTROL	C6	poor	fed	Two	25311.6	0.605751	no
CADAVERINE	A425_31	SELECTED	S1	poor	fed	Two	12722.6	-0.107346	no
CADAVERINE	A426_32	SELECTED	S2	poor	fed	Two	12743.3	-0.105658	no
CADAVERINE	A427_33	SELECTED	S3	poor	fed	Two	11208	-0.238741	no
CADAVERINE	A428_34	SELECTED	S4	poor	fed	Two	15729.4	0.11258	no
CADAVERINE	A429_35	SELECTED	S5	poor	fed	Two	11136.5	-0.245376	no
CADAVERINE	A430_36	SELECTED	S6	poor	fed	Two	13711.5	-0.0297494	no
CADAVERINE	AS201_13	CONTROL	C1	standard	starved	Two	12101.1	-0.159265	no
CADAVERINE	AS202_14	CONTROL	C2	standard	starved	Two	8020.83	-0.585595	no
CADAVERINE	AS203_15	CONTROL	C3	standard	starved	Two	9149.55	-0.449106	no
CADAVERINE	AS204_16	CONTROL	C4	standard	starved	Two	20611.8	0.392823	no
CADAVERINE	AS205_17	CONTROL	C5	standard	starved	Two	8386.74	-0.539349	no
CADAVERINE	AS206_18	CONTROL	C6	standard	starved	Two	9741.11	-0.384159	no
CADAVERINE	AS225_19	SELECTED	S1	standard	starved	Two	12072	-0.161762	no
CADAVERINE	AS226_20	SELECTED	S2	standard	starved	Two	15312.1	0.0847048	no
CADAVERINE	AS227_21	SELECTED	S3	standard	starved	Two	37009.9	0.999599	no
CADAVERINE	AS228_22	SELECTED	S4	standard	starved	Two	26012.5	0.634067	no
CADAVERINE	AS229_23	SELECTED	S5	standard	starved	Two	16451.7	0.159123	no
CADAVERINE	AS230_24	SELECTED	S6	standard	starved	Two	21960.2	0.458514	no
CADAVERINE	AS401_37	CONTROL	C1	poor	starved	Two	15281.3	0.0826187	no
CADAVERINE	AS402_38	CONTROL	C2	poor	starved	Two	10760.4	-0.280996	no
CADAVERINE	AS403_39	CONTROL	C3	poor	starved	Two	9805.07	-0.377375	no
CADAVERINE	AS404_40	CONTROL	C4	poor	starved	Two	13868.3	-0.0179635	no
CADAVERINE	AS405_41	CONTROL	C5	poor	starved	Two	10323.1	-0.323998	no
CADAVERINE	AS406_42	CONTROL	C6	poor	starved	Two	13296.8	-0.0615836	no
CADAVERINE	AS425_43	SELECTED	S1	poor	starved	Two	15848.1	0.120376	no
CADAVERINE	AS426_44	SELECTED	S2	poor	starved	Two	12737.5	-0.106137	no
CADAVERINE	AS427_45	SELECTED	S3	poor	starved	Two	13457.3	-0.049145	no
CADAVERINE	AS428_46	SELECTED	S4	poor	starved	Two	19706.3	0.346249	no
CADAVERINE	AS429_47	SELECTED	S5	poor	starved	Two	17438.5	0.219513	no
CADAVERINE	AS430_48	SELECTED	S6	poor	starved	Two	13602.6	-0.0380121	no
CADAVERINE	A101_1	CONTROL	C1	standard	fed	One	19591.3	0.137331	no
CADAVERINE	A102_2	CONTROL	C2	standard	fed	One	14210.4	-0.224524	no
CADAVERINE	A103_3	CONTROL	C3	standard	fed	One	18613.2	0.0796172	no
CADAVERINE	A104_4	CONTROL	C4	standard	fed	One	8621.02	-0.787716	no
CADAVERINE	A105_5	CONTROL	C5	standard	fed	One	18076.8	0.0466641	no
CADAVERINE	A106_6	CONTROL	C6	standard	fed	One	21431.6	0.238506	no
CADAVERINE	A125_7	SELECTED	S1	standard	fed	One	7532.67	-0.939795	no
CADAVERINE	A126_8	SELECTED	S2	standard	fed	One	18962.5	0.100567	no
CADAVERINE	A127_9	SELECTED	S3	standard	fed	One	11871.5	-0.427182	no
CADAVERINE	A128_10	SELECTED	S4	standard	fed	One	20478.8	0.187257	no
CADAVERINE	A129_11	SELECTED	S5	standard	fed	One	18875.6	0.09539	no
CADAVERINE	A130_12	SELECTED	S6	standard	fed	One	37648.4	0.873424	no
CADAVERINE	A301_25	CONTROL	C1	poor	fed	One	18952.2	0.0999591	no
CADAVERINE	A302_26	CONTROL	C2	poor	fed	One	16911.7	-0.0284105	no
CADAVERINE	A303_27	CONTROL	C3	poor	fed	One	27007.6	0.499098	no
CADAVERINE	A304_28	CONTROL	C4	poor	fed	One	16008.6	-0.0902537	no
CADAVERINE	A305_29	CONTROL	C5	poor	fed	One	19623.2	0.139161	no
CADAVERINE	A306_30	CONTROL	C6	poor	fed	One	22771.3	0.306834	no
CADAVERINE	A325_31	SELECTED	S1	poor	fed	One	16134.5	-0.0814276	no
CADAVERINE	A326_32	SELECTED	S2	poor	fed	One	20727.7	0.200869	no
CADAVERINE	A327_33	SELECTED	S3	poor	fed	One	18638.3	0.0811374	no
CADAVERINE	A328_34	SELECTED	S4	poor	fed	One	20174.6	0.170394	no
CADAVERINE	A329_35	SELECTED	S5	poor	fed	One	12171.1	-0.399095	no
CADAVERINE	A330_36	SELECTED	S6	poor	fed	One	15311.4	-0.140439	no
CADAVERINE	AS101_13	CONTROL	C1	standard	starved	One	26819.7	0.491233	no
CADAVERINE	AS102_14	CONTROL	C2	standard	starved	One	12688.9	-0.352141	no
CADAVERINE	AS103_15	CONTROL	C3	standard	starved	One	15533	-0.124245	no
CADAVERINE	AS104_16	CONTROL	C4	standard	starved	One	15796.3	-0.105302	no
CADAVERINE	AS105_17	CONTROL	C5	standard	starved	One	29003.2	0.579435	no
CADAVERINE	AS106_18	CONTROL	C6	standard	starved	One	25480.9	0.433528	no
CADAVERINE	AS125_19	SELECTED	S1	standard	starved	One	19433.1	0.128195	no
CADAVERINE	AS126_20	SELECTED	S2	standard	starved	One	27954.3	0.537924	no
CADAVERINE	AS127_21	SELECTED	S3	standard	starved	One	18646.6	0.0816345	no
CADAVERINE	AS128_22	SELECTED	S4	standard	starved	One	24922.5	0.408557	no
CADAVERINE	AS129_23	SELECTED	S5	standard	starved	One	13601.8	-0.273858	no
CADAVERINE	AS130_24	SELECTED	S6	standard	starved	One	9182.01	-0.716674	no
CADAVERINE	AS301_37	CONTROL	C1	poor	starved	One	17648.7	0.0196579	no
CADAVERINE	AS302_38	CONTROL	C2	poor	starved	One	14696.2	-0.186646	no
CADAVERINE	AS303_39	CONTROL	C3	poor	starved	One	14786.2	-0.179766	no
CADAVERINE	AS304_40	CONTROL	C4	poor	starved	One	16824.1	-0.034264	no
CADAVERINE	AS305_41	CONTROL	C5	poor	starved	One	14650.2	-0.190183	no
CADAVERINE	AS306_42	CONTROL	C6	poor	starved	One	15978.4	-0.0923849	no
CADAVERINE	AS325_43	SELECTED	S1	poor	starved	One	16619.4	-0.0480604	no
CADAVERINE	AS326_44	SELECTED	S2	poor	starved	One	23504.8	0.342558	no
CADAVERINE	AS327_45	SELECTED	S3	poor	starved	One	17974.4	0.040266	no
CADAVERINE	AS328_46	SELECTED	S4	poor	starved	One	12630.5	-0.35734	no
CADAVERINE	AS329_47	SELECTED	S5	poor	starved	One	27208.9	0.507467	no
CADAVERINE	AS330_48	SELECTED	S6	poor	starved	One	6849.35	-1.04696	no
CARNITINE	A201_1	CONTROL	C1	standard	fed	Two	3.68358e+06	-0.272083	no
CARNITINE	A202_2	CONTROL	C2	standard	fed	Two	5.07004e+06	0.177416	no
CARNITINE	A203_3	CONTROL	C3	standard	fed	Two	5.49796e+06	0.291427	no
CARNITINE	A204_4	CONTROL	C4	standard	fed	Two	3.97629e+06	-0.164492	no
CARNITINE	A205_5	CONTROL	C5	standard	fed	Two	4.3042e+06	-0.0529955	no
CARNITINE	A206_6	CONTROL	C6	standard	fed	Two	4.34082e+06	-0.0410749	no
CARNITINE	A225_7	SELECTED	S1	standard	fed	Two	3.93811e+06	-0.178069	no
CARNITINE	A226_8	SELECTED	S2	standard	fed	Two	3.55729e+06	-0.32117	no
CARNITINE	A227_9	SELECTED	S3	standard	fed	Two	6.68105e+06	0.565657	no
CARNITINE	A228_10	SELECTED	S4	standard	fed	Two	5.10108e+06	0.186004	no
CARNITINE	A229_11	SELECTED	S5	standard	fed	Two	3.65998e+06	-0.281124	no
CARNITINE	A230_12	SELECTED	S6	standard	fed	Two	4.03727e+06	-0.143081	no
CARNITINE	A401_25	CONTROL	C1	poor	fed	Two	4.34731e+06	-0.0389749	no
CARNITINE	A402_26	CONTROL	C2	poor	fed	Two	4.47106e+06	0.000518472	no
CARNITINE	A403_27	CONTROL	C3	poor	fed	Two	3.75333e+06	-0.245687	no
CARNITINE	A404_28	CONTROL	C4	poor	fed	Two	3.40373e+06	-0.383256	no
CARNITINE	A405_29	CONTROL	C5	poor	fed	Two	2.94941e+06	-0.584837	no
CARNITINE	A406_30	CONTROL	C6	poor	fed	Two	3.48221e+06	-0.351184	no
CARNITINE	A425_31	SELECTED	S1	poor	fed	Two	2.91073e+06	-0.603415	no
CARNITINE	A426_32	SELECTED	S2	poor	fed	Two	2.9325e+06	-0.59293	no
CARNITINE	A427_33	SELECTED	S3	poor	fed	Two	4.72726e+06	0.0789193	no
CARNITINE	A428_34	SELECTED	S4	poor	fed	Two	4.31533e+06	-0.0493622	no
CARNITINE	A429_35	SELECTED	S5	poor	fed	Two	3.82898e+06	-0.217609	no
CARNITINE	A430_36	SELECTED	S6	poor	fed	Two	3.66941e+06	-0.277504	no
CARNITINE	AS201_13	CONTROL	C1	standard	starved	Two	3.81953e+06	-0.221087	no
CARNITINE	AS202_14	CONTROL	C2	standard	starved	Two	4.55935e+06	0.0280334	no
CARNITINE	AS203_15	CONTROL	C3	standard	starved	Two	5.69452e+06	0.340853	no
CARNITINE	AS204_16	CONTROL	C4	standard	starved	Two	4.62305e+06	0.047554	no
CARNITINE	AS205_17	CONTROL	C5	standard	starved	Two	6.01512e+06	0.417919	no
CARNITINE	AS206_18	CONTROL	C6	standard	starved	Two	6.46272e+06	0.518909	no
CARNITINE	AS225_19	SELECTED	S1	standard	starved	Two	4.76969e+06	0.0914928	no
CARNITINE	AS226_20	SELECTED	S2	standard	starved	Two	4.31662e+06	-0.0489439	no
CARNITINE	AS227_21	SELECTED	S3	standard	starved	Two	5.88953e+06	0.388229	no
CARNITINE	AS228_22	SELECTED	S4	standard	starved	Two	6.14086e+06	0.447029	no
CARNITINE	AS229_23	SELECTED	S5	standard	starved	Two	4.78271e+06	0.0953277	no
CARNITINE	AS230_24	SELECTED	S6	standard	starved	Two	5.09665e+06	0.184781	no
CARNITINE	AS401_37	CONTROL	C1	poor	starved	Two	4.93854e+06	0.14044	no
CARNITINE	AS402_38	CONTROL	C2	poor	starved	Two	7.1196e+06	0.655111	no
CARNITINE	AS403_39	CONTROL	C3	poor	starved	Two	4.52739e+06	0.0181348	no
CARNITINE	AS404_40	CONTROL	C4	poor	starved	Two	4.93301e+06	0.138866	no
CARNITINE	AS405_41	CONTROL	C5	poor	starved	Two	4.11142e+06	-0.117471	no
CARNITINE	AS406_42	CONTROL	C6	poor	starved	Two	3.738e+06	-0.251446	no
CARNITINE	AS425_43	SELECTED	S1	poor	starved	Two	4.08466e+06	-0.126658	no
CARNITINE	AS426_44	SELECTED	S2	poor	starved	Two	4.41604e+06	-0.0169031	no
CARNITINE	AS427_45	SELECTED	S3	poor	starved	Two	6.70256e+06	0.570179	no
CARNITINE	AS428_46	SELECTED	S4	poor	starved	Two	4.06227e+06	-0.134394	no
CARNITINE	AS429_47	SELECTED	S5	poor	starved	Two	4.09708e+06	-0.122387	no
CARNITINE	AS430_48	SELECTED	S6	poor	starved	Two	6.17723e+06	0.455338	no
CARNITINE	A101_1	CONTROL	C1	standard	fed	One	2.829e+06	-0.740584	no
CARNITINE	A102_2	CONTROL	C2	standard	fed	One	5.19711e+06	0.120137	no
CARNITINE	A103_3	CONTROL	C3	standard	fed	One	5.50669e+06	0.202024	no
CARNITINE	A104_4	CONTROL	C4	standard	fed	One	3.404e+06	-0.478724	no
CARNITINE	A105_5	CONTROL	C5	standard	fed	One	3.66938e+06	-0.372481	no
CARNITINE	A106_6	CONTROL	C6	standard	fed	One	4.77599e+06	0.000545838	no
CARNITINE	A125_7	SELECTED	S1	standard	fed	One	3.38011e+06	-0.488691	no
CARNITINE	A126_8	SELECTED	S2	standard	fed	One	5.706e+06	0.252342	no
CARNITINE	A127_9	SELECTED	S3	standard	fed	One	5.10507e+06	0.0948501	no
CARNITINE	A128_10	SELECTED	S4	standard	fed	One	4.99883e+06	0.0650864	no
CARNITINE	A129_11	SELECTED	S5	standard	fed	One	3.65592e+06	-0.377681	no
CARNITINE	A130_12	SELECTED	S6	standard	fed	One	4.5504e+06	-0.0679295	no
CARNITINE	A301_25	CONTROL	C1	poor	fed	One	3.18311e+06	-0.573675	no
CARNITINE	A302_26	CONTROL	C2	poor	fed	One	4.77012e+06	-0.00119311	no
CARNITINE	A303_27	CONTROL	C3	poor	fed	One	4.22172e+06	-0.174034	no
CARNITINE	A304_28	CONTROL	C4	poor	fed	One	5.39386e+06	0.172726	no
CARNITINE	A305_29	CONTROL	C5	poor	fed	One	4.58328e+06	-0.0577405	no
CARNITINE	A306_30	CONTROL	C6	poor	fed	One	5.48832e+06	0.197294	no
CARNITINE	A325_31	SELECTED	S1	poor	fed	One	3.05206e+06	-0.633177	no
CARNITINE	A326_32	SELECTED	S2	poor	fed	One	3.66643e+06	-0.373616	no
CARNITINE	A327_33	SELECTED	S3	poor	fed	One	4.28465e+06	-0.153094	no
CARNITINE	A328_34	SELECTED	S4	poor	fed	One	5.04917e+06	0.0792656	no
CARNITINE	A329_35	SELECTED	S5	poor	fed	One	4.17631e+06	-0.18934	no
CARNITINE	A330_36	SELECTED	S6	poor	fed	One	4.17727e+06	-0.189016	no
CARNITINE	AS101_13	CONTROL	C1	standard	starved	One	5.2433e+06	0.13266	no
CARNITINE	AS102_14	CONTROL	C2	standard	starved	One	6.21125e+06	0.372416	no
CARNITINE	AS103_15	CONTROL	C3	standard	starved	One	4.59896e+06	-0.0529087	no
CARNITINE	AS104_16	CONTROL	C4	standard	starved	One	5.43035e+06	0.182267	no
CARNITINE	AS105_17	CONTROL	C5	standard	starved	One	5.13571e+06	0.103316	no
CARNITINE	AS106_18	CONTROL	C6	standard	starved	One	4.77923e+06	0.00150824	no
CARNITINE	AS125_19	SELECTED	S1	standard	starved	One	5.17158e+06	0.113168	no
CARNITINE	AS126_20	SELECTED	S2	standard	starved	One	5.15992e+06	0.109974	no
CARNITINE	AS127_21	SELECTED	S3	standard	starved	One	5.67974e+06	0.245815	no
CARNITINE	AS128_22	SELECTED	S4	standard	starved	One	5.89412e+06	0.298249	no
CARNITINE	AS129_23	SELECTED	S5	standard	starved	One	4.39158e+06	-0.118208	no
CARNITINE	AS130_24	SELECTED	S6	standard	starved	One	4.16313e+06	-0.193814	no
CARNITINE	AS301_37	CONTROL	C1	poor	starved	One	3.68627e+06	-0.365978	no
CARNITINE	AS302_38	CONTROL	C2	poor	starved	One	8.80659e+06	0.866531	no
CARNITINE	AS303_39	CONTROL	C3	poor	starved	One	6.09593e+06	0.345894	no
CARNITINE	AS304_40	CONTROL	C4	poor	starved	One	6.33688e+06	0.400757	no
CARNITINE	AS305_41	CONTROL	C5	poor	starved	One	5.64572e+06	0.237312	no
CARNITINE	AS306_42	CONTROL	C6	poor	starved	One	5.00749e+06	0.067536	no
CARNITINE	AS325_43	SELECTED	S1	poor	starved	One	5.24139e+06	0.132145	no
CARNITINE	AS326_44	SELECTED	S2	poor	starved	One	4.84951e+06	0.0221659	no
CARNITINE	AS327_45	SELECTED	S3	poor	starved	One	5.17679e+06	0.114592	no
CARNITINE	AS328_46	SELECTED	S4	poor	starved	One	4.80277e+06	0.0084605	no
CARNITINE	AS329_47	SELECTED	S5	poor	starved	One	6.38007e+06	0.410369	no
CARNITINE	AS330_48	SELECTED	S6	poor	starved	One	5.70655e+06	0.252479	no
CDP-ETHANOLAMINE	A201_1	CONTROL	C1	standard	fed	Two	4112.06	0.516724	no
CDP-ETHANOLAMINE	A202_2	CONTROL	C2	standard	fed	Two	3845.59	0.431674	no
CDP-ETHANOLAMINE	A203_3	CONTROL	C3	standard	fed	Two	3502.44	0.313026	no
CDP-ETHANOLAMINE	A204_4	CONTROL	C4	standard	fed	Two	1820.11	-0.517896	no
CDP-ETHANOLAMINE	A205_5	CONTROL	C5	standard	fed	Two	2819.32	0.0376049	no
CDP-ETHANOLAMINE	A206_6	CONTROL	C6	standard	fed	Two	2572.69	-0.0786034	no
CDP-ETHANOLAMINE	A225_7	SELECTED	S1	standard	fed	Two	3908.76	0.452358	no
CDP-ETHANOLAMINE	A226_8	SELECTED	S2	standard	fed	Two	2522.25	-0.103739	no
CDP-ETHANOLAMINE	A227_9	SELECTED	S3	standard	fed	Two	3826.65	0.425408	no
CDP-ETHANOLAMINE	A228_10	SELECTED	S4	standard	fed	Two	2323.04	-0.208184	no
CDP-ETHANOLAMINE	A229_11	SELECTED	S5	standard	fed	Two	3911.29	0.453179	no
CDP-ETHANOLAMINE	A230_12	SELECTED	S6	standard	fed	Two	2556.66	-0.0865377	no
CDP-ETHANOLAMINE	A401_25	CONTROL	C1	poor	fed	Two	2382.33	-0.176187	no
CDP-ETHANOLAMINE	A402_26	CONTROL	C2	poor	fed	Two	2256.02	-0.245346	no
CDP-ETHANOLAMINE	A403_27	CONTROL	C3	poor	fed	Two	2629.31	-0.050972	no
CDP-ETHANOLAMINE	A404_28	CONTROL	C4	poor	fed	Two	1199.72	-1.047	no
CDP-ETHANOLAMINE	A405_29	CONTROL	C5	poor	fed	Two	1534.71	-0.734404	no
CDP-ETHANOLAMINE	A406_30	CONTROL	C6	poor	fed	Two	1768.35	-0.554522	no
CDP-ETHANOLAMINE	A425_31	SELECTED	S1	poor	fed	Two	2251.68	-0.247789	no
CDP-ETHANOLAMINE	A426_32	SELECTED	S2	poor	fed	Two	1881.54	-0.475764	no
CDP-ETHANOLAMINE	A427_33	SELECTED	S3	poor	fed	Two	2356.43	-0.190064	no
CDP-ETHANOLAMINE	A428_34	SELECTED	S4	poor	fed	Two	2460.57	-0.13517	no
CDP-ETHANOLAMINE	A429_35	SELECTED	S5	poor	fed	Two	2149.09	-0.306983	no
CDP-ETHANOLAMINE	A430_36	SELECTED	S6	poor	fed	Two	1878.16	-0.478043	no
CDP-ETHANOLAMINE	AS201_13	CONTROL	C1	standard	starved	Two	3511.09	0.316156	no
CDP-ETHANOLAMINE	AS202_14	CONTROL	C2	standard	starved	Two	3078.25	0.149144	no
CDP-ETHANOLAMINE	AS203_15	CONTROL	C3	standard	starved	Two	3546.6	0.328929	no
CDP-ETHANOLAMINE	AS204_16	CONTROL	C4	standard	starved	Two	2450.69	-0.140274	no
CDP-ETHANOLAMINE	AS205_17	CONTROL	C5	standard	starved	Two	3286.37	0.232194	no
CDP-ETHANOLAMINE	AS206_18	CONTROL	C6	standard	starved	Two	3296.95	0.236274	no
CDP-ETHANOLAMINE	AS225_19	SELECTED	S1	standard	starved	Two	3004.11	0.118193	no
CDP-ETHANOLAMINE	AS226_20	SELECTED	S2	standard	starved	Two	3280.67	0.229987	no
CDP-ETHANOLAMINE	AS227_21	SELECTED	S3	standard	starved	Two	3091.27	0.154499	no
CDP-ETHANOLAMINE	AS228_22	SELECTED	S4	standard	starved	Two	2687.55	-0.0231563	no
CDP-ETHANOLAMINE	AS229_23	SELECTED	S5	standard	starved	Two	3099.18	0.157747	no
CDP-ETHANOLAMINE	AS230_24	SELECTED	S6	standard	starved	Two	3853.54	0.434298	no
CDP-ETHANOLAMINE	AS401_37	CONTROL	C1	poor	starved	Two	3019.99	0.124887	no
CDP-ETHANOLAMINE	AS402_38	CONTROL	C2	poor	starved	Two	3639.93	0.361902	no
CDP-ETHANOLAMINE	AS403_39	CONTROL	C3	poor	starved	Two	3082.65	0.150956	no
CDP-ETHANOLAMINE	AS404_40	CONTROL	C4	poor	starved	Two	2219.17	-0.266252	no
CDP-ETHANOLAMINE	AS405_41	CONTROL	C5	poor	starved	Two	3401.23	0.2758	no
CDP-ETHANOLAMINE	AS406_42	CONTROL	C6	poor	starved	Two	2764.2	0.012542	no
CDP-ETHANOLAMINE	AS425_43	SELECTED	S1	poor	starved	Two	2057.36	-0.362359	no
CDP-ETHANOLAMINE	AS426_44	SELECTED	S2	poor	starved	Two	2607.26	-0.0616622	no
CDP-ETHANOLAMINE	AS427_45	SELECTED	S3	poor	starved	Two	3520.2	0.319447	no
CDP-ETHANOLAMINE	AS428_46	SELECTED	S4	poor	starved	Two	2448.77	-0.141273	no
CDP-ETHANOLAMINE	AS429_47	SELECTED	S5	poor	starved	Two	3278.04	0.228971	no
CDP-ETHANOLAMINE	AS430_48	SELECTED	S6	poor	starved	Two	3129.95	0.170285	no
CDP-ETHANOLAMINE	A101_1	CONTROL	C1	standard	fed	One	7439.23	0.595782	no
CDP-ETHANOLAMINE	A102_2	CONTROL	C2	standard	fed	One	6335.54	0.4067	no
CDP-ETHANOLAMINE	A103_3	CONTROL	C3	standard	fed	One	4037.05	-0.123911	no
CDP-ETHANOLAMINE	A104_4	CONTROL	C4	standard	fed	One	4816.02	0.0838249	no
CDP-ETHANOLAMINE	A105_5	CONTROL	C5	standard	fed	One	6254.17	0.39148	no
CDP-ETHANOLAMINE	A106_6	CONTROL	C6	standard	fed	One	5024.39	0.133693	no
CDP-ETHANOLAMINE	A125_7	SELECTED	S1	standard	fed	One	3904.49	-0.163222	no
CDP-ETHANOLAMINE	A126_8	SELECTED	S2	standard	fed	One	5733.06	0.289046	no
CDP-ETHANOLAMINE	A127_9	SELECTED	S3	standard	fed	One	7368.41	0.584521	no
CDP-ETHANOLAMINE	A128_10	SELECTED	S4	standard	fed	One	3774.07	-0.20322	no
CDP-ETHANOLAMINE	A129_11	SELECTED	S5	standard	fed	One	4430.32	-0.0144607	no
CDP-ETHANOLAMINE	A130_12	SELECTED	S6	standard	fed	One	3765.98	-0.205748	no
CDP-ETHANOLAMINE	A301_25	CONTROL	C1	poor	fed	One	4583.25	0.0254951	no
CDP-ETHANOLAMINE	A302_26	CONTROL	C2	poor	fed	One	4030.47	-0.12583	no
CDP-ETHANOLAMINE	A303_27	CONTROL	C3	poor	fed	One	3415.14	-0.320884	no
CDP-ETHANOLAMINE	A304_28	CONTROL	C4	poor	fed	One	2781.33	-0.562595	no
CDP-ETHANOLAMINE	A305_29	CONTROL	C5	poor	fed	One	2998.84	-0.473939	no
CDP-ETHANOLAMINE	A306_30	CONTROL	C6	poor	fed	One	3099.43	-0.435094	no
CDP-ETHANOLAMINE	A325_31	SELECTED	S1	poor	fed	One	3791.39	-0.19783	no
CDP-ETHANOLAMINE	A326_32	SELECTED	S2	poor	fed	One	3757.69	-0.208342	no
CDP-ETHANOLAMINE	A327_33	SELECTED	S3	poor	fed	One	2401.74	-0.73536	no
CDP-ETHANOLAMINE	A328_34	SELECTED	S4	poor	fed	One	2531.04	-0.673622	no
CDP-ETHANOLAMINE	A329_35	SELECTED	S5	poor	fed	One	3887.7	-0.168295	no
CDP-ETHANOLAMINE	A330_36	SELECTED	S6	poor	fed	One	3896.18	-0.165728	no
CDP-ETHANOLAMINE	AS101_13	CONTROL	C1	standard	starved	One	6533.93	0.443005	no
CDP-ETHANOLAMINE	AS102_14	CONTROL	C2	standard	starved	One	6788.32	0.487975	no
CDP-ETHANOLAMINE	AS103_15	CONTROL	C3	standard	starved	One	10165	0.963348	no
CDP-ETHANOLAMINE	AS104_16	CONTROL	C4	standard	starved	One	7554.29	0.613853	no
CDP-ETHANOLAMINE	AS105_17	CONTROL	C5	standard	starved	One	5448.42	0.229089	no
CDP-ETHANOLAMINE	AS106_18	CONTROL	C6	standard	starved	One	3488.32	-0.295921	no
CDP-ETHANOLAMINE	AS125_19	SELECTED	S1	standard	starved	One	4975.78	0.122246	no
CDP-ETHANOLAMINE	AS126_20	SELECTED	S2	standard	starved	One	5156.86	0.164336	no
CDP-ETHANOLAMINE	AS127_21	SELECTED	S3	standard	starved	One	7465.01	0.599856	no
CDP-ETHANOLAMINE	AS128_22	SELECTED	S4	standard	starved	One	6588.81	0.452851	no
CDP-ETHANOLAMINE	AS129_23	SELECTED	S5	standard	starved	One	4876.42	0.0984989	no
CDP-ETHANOLAMINE	AS130_24	SELECTED	S6	standard	starved	One	3697.82	-0.227251	no
CDP-ETHANOLAMINE	AS301_37	CONTROL	C1	poor	starved	One	4466.21	-0.00496204	no
CDP-ETHANOLAMINE	AS302_38	CONTROL	C2	poor	starved	One	5767.13	0.296023	no
CDP-ETHANOLAMINE	AS303_39	CONTROL	C3	poor	starved	One	5356.99	0.209163	no
CDP-ETHANOLAMINE	AS304_40	CONTROL	C4	poor	starved	One	3766.47	-0.205593	no
CDP-ETHANOLAMINE	AS305_41	CONTROL	C5	poor	starved	One	3968.44	-0.144091	no
CDP-ETHANOLAMINE	AS306_42	CONTROL	C6	poor	starved	One	4167.93	-0.0863446	no
CDP-ETHANOLAMINE	AS325_43	SELECTED	S1	poor	starved	One	3446.2	-0.310226	no
CDP-ETHANOLAMINE	AS326_44	SELECTED	S2	poor	starved	One	3209.69	-0.393937	no
CDP-ETHANOLAMINE	AS327_45	SELECTED	S3	poor	starved	One	3528.08	-0.282578	no
CDP-ETHANOLAMINE	AS328_46	SELECTED	S4	poor	starved	One	3675.7	-0.234316	no
CDP-ETHANOLAMINE	AS329_47	SELECTED	S5	poor	starved	One	3999.94	-0.134783	no
CDP-ETHANOLAMINE	AS330_48	SELECTED	S6	poor	starved	One	4145.48	-0.0927036	no
CHOLINE	A201_1	CONTROL	C1	standard	fed	Two	1.93573e+07	-0.0180783	no
CHOLINE	A202_2	CONTROL	C2	standard	fed	Two	2.36519e+07	0.226207	no
CHOLINE	A203_3	CONTROL	C3	standard	fed	Two	2.03277e+07	0.0415574	no
CHOLINE	A204_4	CONTROL	C4	standard	fed	Two	2.63654e+07	0.358615	no
CHOLINE	A205_5	CONTROL	C5	standard	fed	Two	1.9621e+07	-0.00158015	no
CHOLINE	A206_6	CONTROL	C6	standard	fed	Two	2.40552e+07	0.246817	no
CHOLINE	A225_7	SELECTED	S1	standard	fed	Two	2.85857e+07	0.457186	no
CHOLINE	A226_8	SELECTED	S2	standard	fed	Two	2.78598e+07	0.425828	no
CHOLINE	A227_9	SELECTED	S3	standard	fed	Two	2.30537e+07	0.194972	no
CHOLINE	A228_10	SELECTED	S4	standard	fed	Two	2.29668e+07	0.190369	no
CHOLINE	A229_11	SELECTED	S5	standard	fed	Two	2.07876e+07	0.0688304	no
CHOLINE	A230_12	SELECTED	S6	standard	fed	Two	2.69038e+07	0.383256	no
CHOLINE	A401_25	CONTROL	C1	poor	fed	Two	2.55103e+07	0.318419	no
CHOLINE	A402_26	CONTROL	C2	poor	fed	Two	2.03015e+07	0.0399872	no
CHOLINE	A403_27	CONTROL	C3	poor	fed	Two	2.1543e+07	0.112349	no
CHOLINE	A404_28	CONTROL	C4	poor	fed	Two	2.70838e+07	0.391388	no
CHOLINE	A405_29	CONTROL	C5	poor	fed	Two	1.64076e+07	-0.219631	no
CHOLINE	A406_30	CONTROL	C6	poor	fed	Two	3.26372e+07	0.618778	no
CHOLINE	A425_31	SELECTED	S1	poor	fed	Two	3.76532e+07	0.793069	no
CHOLINE	A426_32	SELECTED	S2	poor	fed	Two	2.99335e+07	0.513353	no
CHOLINE	A427_33	SELECTED	S3	poor	fed	Two	1.73751e+07	-0.14978	no
CHOLINE	A428_34	SELECTED	S4	poor	fed	Two	2.02775e+07	0.0385413	no
CHOLINE	A429_35	SELECTED	S5	poor	fed	Two	2.91258e+07	0.480004	no
CHOLINE	A430_36	SELECTED	S6	poor	fed	Two	2.86935e+07	0.461776	no
CHOLINE	AS201_13	CONTROL	C1	standard	starved	Two	1.11174e+07	-0.69415	no
CHOLINE	AS202_14	CONTROL	C2	standard	starved	Two	1.09332e+07	-0.714523	no
CHOLINE	AS203_15	CONTROL	C3	standard	starved	Two	1.40232e+07	-0.41107	no
CHOLINE	AS204_16	CONTROL	C4	standard	starved	Two	1.50775e+07	-0.322695	no
CHOLINE	AS205_17	CONTROL	C5	standard	starved	Two	1.25025e+07	-0.551007	no
CHOLINE	AS206_18	CONTROL	C6	standard	starved	Two	2.26766e+07	0.174869	no
CHOLINE	AS225_19	SELECTED	S1	standard	starved	Two	1.92959e+07	-0.0219507	no
CHOLINE	AS226_20	SELECTED	S2	standard	starved	Two	1.96264e+07	-0.00124352	no
CHOLINE	AS227_21	SELECTED	S3	standard	starved	Two	1.69476e+07	-0.180154	no
CHOLINE	AS228_22	SELECTED	S4	standard	starved	Two	1.62461e+07	-0.231692	no
CHOLINE	AS229_23	SELECTED	S5	standard	starved	Two	1.96048e+07	-0.00258649	no
CHOLINE	AS230_24	SELECTED	S6	standard	starved	Two	1.64453e+07	-0.216835	no
CHOLINE	AS401_37	CONTROL	C1	poor	starved	Two	1.44188e+07	-0.377157	no
CHOLINE	AS402_38	CONTROL	C2	poor	starved	Two	1.50493e+07	-0.32498	no
CHOLINE	AS403_39	CONTROL	C3	poor	starved	Two	1.30101e+07	-0.502489	no
CHOLINE	AS404_40	CONTROL	C4	poor	starved	Two	2.17188e+07	0.122258	no
CHOLINE	AS405_41	CONTROL	C5	poor	starved	Two	2.08842e+07	0.0744846	no
CHOLINE	AS406_42	CONTROL	C6	poor	starved	Two	2.02457e+07	0.0366302	no
CHOLINE	AS425_43	SELECTED	S1	poor	starved	Two	1.82233e+07	-0.0916755	no
CHOLINE	AS426_44	SELECTED	S2	poor	starved	Two	1.54877e+07	-0.289972	no
CHOLINE	AS427_45	SELECTED	S3	poor	starved	Two	1.47237e+07	-0.351646	no
CHOLINE	AS428_46	SELECTED	S4	poor	starved	Two	1.14852e+07	-0.654478	no
CHOLINE	AS429_47	SELECTED	S5	poor	starved	Two	1.86379e+07	-0.0642467	no
CHOLINE	AS430_48	SELECTED	S6	poor	starved	Two	1.44334e+07	-0.375923	no
CHOLINE	A101_1	CONTROL	C1	standard	fed	One	1.62398e+07	0.0244783	no
CHOLINE	A102_2	CONTROL	C2	standard	fed	One	1.33745e+07	-0.203908	no
CHOLINE	A103_3	CONTROL	C3	standard	fed	One	1.52636e+07	-0.048466	no
CHOLINE	A104_4	CONTROL	C4	standard	fed	One	1.91405e+07	0.217828	no
CHOLINE	A105_5	CONTROL	C5	standard	fed	One	2.04538e+07	0.295906	no
CHOLINE	A106_6	CONTROL	C6	standard	fed	One	2.49254e+07	0.528523	no
CHOLINE	A125_7	SELECTED	S1	standard	fed	One	1.34082e+07	-0.20095	no
CHOLINE	A126_8	SELECTED	S2	standard	fed	One	1.81238e+07	0.153613	no
CHOLINE	A127_9	SELECTED	S3	standard	fed	One	1.70556e+07	0.0821389	no
CHOLINE	A128_10	SELECTED	S4	standard	fed	One	1.03703e+07	-0.503224	no
CHOLINE	A129_11	SELECTED	S5	standard	fed	One	2.77568e+07	0.655113	no
CHOLINE	A130_12	SELECTED	S6	standard	fed	One	2.56702e+07	0.563167	no
CHOLINE	A301_25	CONTROL	C1	poor	fed	One	1.12661e+07	-0.405746	no
CHOLINE	A302_26	CONTROL	C2	poor	fed	One	1.49332e+07	-0.0742115	no
CHOLINE	A303_27	CONTROL	C3	poor	fed	One	1.98349e+07	0.259756	no
CHOLINE	A304_28	CONTROL	C4	poor	fed	One	2.22152e+07	0.393094	no
CHOLINE	A305_29	CONTROL	C5	poor	fed	One	1.89837e+07	0.208148	no
CHOLINE	A306_30	CONTROL	C6	poor	fed	One	2.18629e+07	0.374289	no
CHOLINE	A325_31	SELECTED	S1	poor	fed	One	2.25625e+07	0.411345	no
CHOLINE	A326_32	SELECTED	S2	poor	fed	One	3.05985e+07	0.769788	no
CHOLINE	A327_33	SELECTED	S3	poor	fed	One	2.18144e+07	0.371674	no
CHOLINE	A328_34	SELECTED	S4	poor	fed	One	1.70555e+07	0.0821366	no
CHOLINE	A329_35	SELECTED	S5	poor	fed	One	2.28009e+07	0.423712	no
CHOLINE	A330_36	SELECTED	S6	poor	fed	One	1.47501e+07	-0.0887222	no
CHOLINE	AS101_13	CONTROL	C1	standard	starved	One	1.16458e+07	-0.366739	no
CHOLINE	AS102_14	CONTROL	C2	standard	starved	One	1.23101e+07	-0.301476	no
CHOLINE	AS103_15	CONTROL	C3	standard	starved	One	1.55058e+07	-0.0299414	no
CHOLINE	AS104_16	CONTROL	C4	standard	starved	One	1.76726e+07	0.123953	no
CHOLINE	AS105_17	CONTROL	C5	standard	starved	One	1.33759e+07	-0.203785	no
CHOLINE	AS106_18	CONTROL	C6	standard	starved	One	10896562	-0.444979	no
CHOLINE	AS125_19	SELECTED	S1	standard	starved	One	1.49135e+07	-0.0757609	no
CHOLINE	AS126_20	SELECTED	S2	standard	starved	One	1.15841e+07	-0.372993	no
CHOLINE	AS127_21	SELECTED	S3	standard	starved	One	1.42368e+07	-0.130397	no
CHOLINE	AS128_22	SELECTED	S4	standard	starved	One	1.6367e+07	0.0336578	no
CHOLINE	AS129_23	SELECTED	S5	standard	starved	One	2.5264e+07	0.544402	no
CHOLINE	AS130_24	SELECTED	S6	standard	starved	One	1.47447e+07	-0.089153	no
CHOLINE	AS301_37	CONTROL	C1	poor	starved	One	6.93088e+06	-0.97731	no
CHOLINE	AS302_38	CONTROL	C2	poor	starved	One	8.44953e+06	-0.744213	no
CHOLINE	AS303_39	CONTROL	C3	poor	starved	One	1.30801e+07	-0.23009	no
CHOLINE	AS304_40	CONTROL	C4	poor	starved	One	1.87395e+07	0.192915	no
CHOLINE	AS305_41	CONTROL	C5	poor	starved	One	9.83302e+06	-0.565809	no
CHOLINE	AS306_42	CONTROL	C6	poor	starved	One	1.48653e+07	-0.0795728	no
CHOLINE	AS325_43	SELECTED	S1	poor	starved	One	1.49999e+07	-0.0689668	no
CHOLINE	AS326_44	SELECTED	S2	poor	starved	One	1.78267e+07	0.134165	no
CHOLINE	AS327_45	SELECTED	S3	poor	starved	One	1.72757e+07	0.0972256	no
CHOLINE	AS328_46	SELECTED	S4	poor	starved	One	1.30997e+07	-0.228335	no
CHOLINE	AS329_47	SELECTED	S5	poor	starved	One	1.57783e+07	-0.0094467	no
CHOLINE	AS330_48	SELECTED	S6	poor	starved	One	1.04267e+07	-0.496832	no
CITICOLINE	A201_1	CONTROL	C1	standard	fed	Two	2091.55	1.03148	no
CITICOLINE	A202_2	CONTROL	C2	standard	fed	Two	1252.24	0.47871	no
CITICOLINE	A203_3	CONTROL	C3	standard	fed	Two	1401.43	0.599997	no
CITICOLINE	A204_4	CONTROL	C4	standard	fed	Two	474.445	-0.567137	no
CITICOLINE	A205_5	CONTROL	C5	standard	fed	Two	736.107	-0.0938292	no
CITICOLINE	A206_6	CONTROL	C6	standard	fed	Two	1226.62	0.456435	no
CITICOLINE	A225_7	SELECTED	S1	standard	fed	Two	1016.47	0.253924	no
CITICOLINE	A226_8	SELECTED	S2	standard	fed	Two	1104.07	0.343005	no
CITICOLINE	A227_9	SELECTED	S3	standard	fed	Two	1005.69	0.24244	no
CITICOLINE	A228_10	SELECTED	S4	standard	fed	Two	1157.52	0.393946	no
CITICOLINE	A229_11	SELECTED	S5	standard	fed	Two	1366.64	0.572914	no
CITICOLINE	A230_12	SELECTED	S6	standard	fed	Two	748.42	-0.0759533	no
CITICOLINE	A401_25	CONTROL	C1	poor	fed	Two	805.356	0.00305544	no
CITICOLINE	A402_26	CONTROL	C2	poor	fed	Two	872.99	0.0899517	no
CITICOLINE	A403_27	CONTROL	C3	poor	fed	Two	729.405	-0.103685	no
CITICOLINE	A404_28	CONTROL	C4	poor	fed	Two	280.814	-1.13228	no
CITICOLINE	A405_29	CONTROL	C5	poor	fed	Two	478.112	-0.558841	no
CITICOLINE	A406_30	CONTROL	C6	poor	fed	Two	732.867	-0.0985827	no
CITICOLINE	A425_31	SELECTED	S1	poor	fed	Two	314.653	-1.00968	no
CITICOLINE	A426_32	SELECTED	S2	poor	fed	Two	692.792	-0.15918	no
CITICOLINE	A427_33	SELECTED	S3	poor	fed	Two	910.932	0.135797	no
CITICOLINE	A428_34	SELECTED	S4	poor	fed	Two	885.648	0.105464	no
CITICOLINE	A429_35	SELECTED	S5	poor	fed	Two	888.304	0.108691	no
CITICOLINE	A430_36	SELECTED	S6	poor	fed	Two	620.759	-0.277485	no
CITICOLINE	AS201_13	CONTROL	C1	standard	starved	Two	1234.8	0.463599	no
CITICOLINE	AS202_14	CONTROL	C2	standard	starved	Two	752.028	-0.0707709	no
CITICOLINE	AS203_15	CONTROL	C3	standard	starved	Two	1116.19	0.354767	no
CITICOLINE	AS204_16	CONTROL	C4	standard	starved	Two	858.485	0.0718968	no
CITICOLINE	AS205_17	CONTROL	C5	standard	starved	Two	654.427	-0.22057	no
CITICOLINE	AS206_18	CONTROL	C6	standard	starved	Two	652.101	-0.224407	no
CITICOLINE	AS225_19	SELECTED	S1	standard	starved	Two	727.518	-0.106477	no
CITICOLINE	AS226_20	SELECTED	S2	standard	starved	Two	704.866	-0.140562	no
CITICOLINE	AS227_21	SELECTED	S3	standard	starved	Two	919.839	0.146282	no
CITICOLINE	AS228_22	SELECTED	S4	standard	starved	Two	675.925	-0.18574	no
CITICOLINE	AS229_23	SELECTED	S5	standard	starved	Two	988.558	0.223921	no
CITICOLINE	AS230_24	SELECTED	S6	standard	starved	Two	826.925	0.0315356	no
CITICOLINE	AS401_37	CONTROL	C1	poor	starved	Two	1001.54	0.237975	no
CITICOLINE	AS402_38	CONTROL	C2	poor	starved	Two	696.043	-0.154135	no
CITICOLINE	AS403_39	CONTROL	C3	poor	starved	Two	793.378	-0.0130918	no
CITICOLINE	AS404_40	CONTROL	C4	poor	starved	Two	478.029	-0.559028	no
CITICOLINE	AS405_41	CONTROL	C5	poor	starved	Two	1252.4	0.478849	no
CITICOLINE	AS406_42	CONTROL	C6	poor	starved	Two	565.869	-0.377248	no
CITICOLINE	AS425_43	SELECTED	S1	poor	starved	Two	638.44	-0.247221	no
CITICOLINE	AS426_44	SELECTED	S2	poor	starved	Two	487.968	-0.536853	no
CITICOLINE	AS427_45	SELECTED	S3	poor	starved	Two	1123.83	0.36212	no
CITICOLINE	AS428_46	SELECTED	S4	poor	starved	Two	833.135	0.0395978	no
CITICOLINE	AS429_47	SELECTED	S5	poor	starved	Two	794.415	-0.0116842	no
CITICOLINE	AS430_48	SELECTED	S6	poor	starved	Two	606.846	-0.301912	no
CITICOLINE	A101_1	CONTROL	C1	standard	fed	One	3079.96	0.57392	no
CITICOLINE	A102_2	CONTROL	C2	standard	fed	One	3394.07	0.671642	no
CITICOLINE	A103_3	CONTROL	C3	standard	fed	One	1650.75	-0.0536849	no
CITICOLINE	A104_4	CONTROL	C4	standard	fed	One	2731.57	0.453125	no
CITICOLINE	A105_5	CONTROL	C5	standard	fed	One	3231.16	0.622147	no
CITICOLINE	A106_6	CONTROL	C6	standard	fed	One	2692.65	0.438684	no
CITICOLINE	A125_7	SELECTED	S1	standard	fed	One	2139.96	0.207502	no
CITICOLINE	A126_8	SELECTED	S2	standard	fed	One	1951.77	0.114872	no
CITICOLINE	A127_9	SELECTED	S3	standard	fed	One	3488.8	0.699345	no
CITICOLINE	A128_10	SELECTED	S4	standard	fed	One	1649.14	-0.0546694	no
CITICOLINE	A129_11	SELECTED	S5	standard	fed	One	1817.67	0.0432461	no
CITICOLINE	A130_12	SELECTED	S6	standard	fed	One	1870.92	0.0722977	no
CITICOLINE	A301_25	CONTROL	C1	poor	fed	One	1295.51	-0.297539	no
CITICOLINE	A302_26	CONTROL	C2	poor	fed	One	2437.38	0.338456	no
CITICOLINE	A303_27	CONTROL	C3	poor	fed	One	1255.5	-0.329105	no
CITICOLINE	A304_28	CONTROL	C4	poor	fed	One	1521.3	-0.135865	no
CITICOLINE	A305_29	CONTROL	C5	poor	fed	One	1303.89	-0.291047	no
CITICOLINE	A306_30	CONTROL	C6	poor	fed	One	1610.51	-0.0785204	no
CITICOLINE	A325_31	SELECTED	S1	poor	fed	One	1011.15	-0.546913	no
CITICOLINE	A326_32	SELECTED	S2	poor	fed	One	1291.28	-0.300826	no
CITICOLINE	A327_33	SELECTED	S3	poor	fed	One	1144.39	-0.422352	no
CITICOLINE	A328_34	SELECTED	S4	poor	fed	One	1472.14	-0.168919	no
CITICOLINE	A329_35	SELECTED	S5	poor	fed	One	1931.25	0.104239	no
CITICOLINE	A330_36	SELECTED	S6	poor	fed	One	2533.07	0.377205	no
CITICOLINE	AS101_13	CONTROL	C1	standard	starved	One	1813.76	0.0410752	no
CITICOLINE	AS102_14	CONTROL	C2	standard	starved	One	2822.81	0.486189	no
CITICOLINE	AS103_15	CONTROL	C3	standard	starved	One	3769.51	0.777218	no
CITICOLINE	AS104_16	CONTROL	C4	standard	starved	One	2500.12	0.36403	no
CITICOLINE	AS105_17	CONTROL	C5	standard	starved	One	1320.25	-0.278497	no
CITICOLINE	AS106_18	CONTROL	C6	standard	starved	One	1007.39	-0.55066	no
CITICOLINE	AS125_19	SELECTED	S1	standard	starved	One	1912.39	0.0943631	no
[truncated: 8,849 more rows]
